# Supplementary material for: Transcriptional Dynamics Uncover the Role of BNIP3 in Mitophagy during Muscle Remodeling in Drosophila
Source: bioRxiv preprint, doi:10.1101/2024.12.30.630714, version 2 (2025-06-11)
Supplement: Supplementary File 1 [file 630714_file06.xlsx]

## Sheet: DESeq2NormalizedCount
ens_gene	ext_gene	biotype	chr	ctrl_3IL_1	ctrl_3IL_2	ctrl_3IL_3	ctrl_3IL_4	ctrl_1dAPF_1	ctrl_1dAPF_2	ctrl_1dAPF_3	ctrl_1dAPF_4	ctrl_2dAPF_1	ctrl_2dAPF_2	ctrl_2dAPF_3	ctrl_2dAPF_4	ctrl_3dAPF_1	ctrl_3dAPF_2	ctrl_3dAPF_3	ctrl_3dAPF_4	ctrl_4dAPF_1	ctrl_4dAPF_2	ctrl_4dAPF_3	ctrl_4dAPF_4	IR-Atg18_3IL_1	IR-Atg18_3IL_2	IR-Atg18_3IL_3	IR-Atg18_3IL_4	IR-Atg18_1dAPF_1	IR-Atg18_1dAPF_2	IR-Atg18_1dAPF_3	IR-Atg18_1dAPF_4	IR-Atg18_2dAPF_1	IR-Atg18_2dAPF_2	IR-Atg18_2dAPF_3	IR-Atg18_2dAPF_4	IR-Atg18_3dAPF_1	IR-Atg18_3dAPF_2	IR-Atg18_3dAPF_3	IR-Atg18_3dAPF_4	IR-Atg18_4dAPF_1	IR-Atg18_4dAPF_2	IR-Atg18_4dAPF_3	IR-Atg18_4dAPF_4	IR-FIP200_3IL_1	IR-FIP200_3IL_2	IR-FIP200_3IL_3	IR-FIP200_3IL_4	IR-FIP200_1dAPF_1	IR-FIP200_1dAPF_2
FBgn0015380	drl	protein_coding	2L	0	0	0	0	2.23455	1.59532	0.784039	0.677411	10.5093	3.06888	3.58036	6.61482	0	0	0	0	7.34182	14.56	24.0652	9.7267	3.55261	5.10336	4.25852	0	0	0	1.76472	1.0212	1.06399	1.67578	1.16624	0.944461	0	0.674369	0	0	18.1874	5.28902	1.59918	2.6905	12.4127	1.68573	2.41439	0	2.8183	1.15538
FBgn0010356	Taf5	protein_coding	2R	7.45078	12.3118	13.0102	16.2885	34.2631	30.7099	21.9531	25.7416	24.7278	27.6199	21.4822	30.2392	15.1061	29.2204	14.2514	17.6607	17.3534	20.2222	10.3137	25.0115	6.21706	8.93088	2.12926	6.70872	30.6648	20.3985	12.353	17.3604	19.1518	10.0547	4.66495	14.1669	14.2374	14.1618	14.7321	5.2029	9.92039	10.578	6.39673	13.4525	17.0674	10.1144	12.0719	9.6063	23.9555	24.263
FBgn0250732	gfzf	protein_coding	3R	12.7728	3.07794	0	11.1448	2.9794	2.39298	7.84039	3.38705	6.80015	3.68265	2.86429	2.83492	10.7901	7.30511	9.5009	9.81149	10.679	14.56	14.8975	12.5058	6.21706	6.3792	6.38777	1.67718	5.57542	3.88544	1.76472	4.08479	6.38394	3.35157	9.32989	2.83338	8.54243	12.1386	18.1318	15.6087	9.92039	10.578	7.99592	8.07151	3.87895	4.49528	6.03597	4.11698	0.704574	2.31076
FBgn0033672	rho-7	protein_coding	2R	0	0	0	0	0	0	0	0	0	0	0	0	0	0	0	0	0	0	0	0	0	0	0	3.35436	0	0.971359	0	0	1.06399	0	0	0	0	0.674369	0	0	0	0	0	0	0	0	1.20719	0	0	0
FBgn0264879	lncRNA:CR44070	ncRNA	2R	0	0	0	0	0	0	0	0	0	0	0	0	0	0	0	0	0	0	0	0	0	1.27584	0	0	0	0	0	0	0	0	0	0	0	0	0	0	0	0	0	0	0	0	0	0	0	0
FBgn0263049	lncRNA:let7C	ncRNA	2L	1.0644	10.7728	0	0	2.23455	1.99415	1.56808	2.03223	0	0.613776	2.86429	0.944975	0	1.21752	0	0	0.667438	0.808887	0	0	4.44076	0	0	0	4.18157	3.88544	3.52944	2.04239	11.7039	3.35157	1.16624	0	1.13899	0	0	0	1.6534	0	4.79755	5.381	5.43054	1.12382	0	2.74466	1.40915	1.73307
FBgn0264618	lncRNA:CR43958	ncRNA	4	1.0644	0	0	0.857289	0.74485	0	0	0	0	0.613776	0	0.944975	1.07901	0	0	0	0	0	1.14596	0	0.888152	0	0	3.35436	0	0.971359	0.88236	0	0	0	0	0	0.569496	1.34874	0	0	0	1.0578	0	2.6905	0	1.12382	1.20719	0	0.704574	0.577689
FBgn0261786	mi	protein_coding	2R	0	0	0	0	0	0.39883	0	0	0	0.613776	0	0.944975	0	0	0	0	0	0	0	0	0	0	0	0	0	0	0	0	0	0	1.16624	0	0	0	0	0	0	0	0	0	0	0	0	0	0	0
FBgn0034138	RpS15	protein_coding	2R	359.766	273.936	375.851	264.902	84.168	71.3905	79.188	81.9667	361.026	354.762	294.306	349.641	285.938	340.905	304.029	372.837	252.959	301.715	334.621	337.655	407.662	427.407	657.941	498.122	104.539	118.506	111.177	113.353	392.612	304.992	387.191	360.784	376.437	455.874	436.297	632.153	330.68	356.48	339.027	382.051	555.466	579.33	719.487	477.57	229.691	196.992
FBgn0036451	Helz	protein_coding	3L	72.379	81.5654	105.527	103.732	76.7195	93.7249	91.7326	86.7086	121.166	126.438	120.3	144.581	75.5307	114.447	125.095	76.5296	69.4136	70.3732	59.59	94.488	120.789	57.4128	89.4288	75.4731	78.0559	72.8519	75.0006	82.717	101.079	150.82	86.3015	110.502	92.2583	102.504	84.9929	71.5399	84.3233	82.5087	57.5706	72.6436	99.3012	109.573	76.0532	144.094	72.5711	94.1634
FBgn0031250	Ent1	protein_coding	2L	0	0	0	0	0	0.39883	0	0	0	0	0	0	0	0	0	0	0	0	0	0	0	0	0	0	0	0	0	0	0	0	0	0	0	0	0	0	0	0	0	0	0	0	0	0	0	0
FBgn0037409	Osi24	protein_coding	3R	0	0	0	0	0	0.39883	0	0	0	0	0	0	1.07901	0	0	0	0	0	0	0	0	0	0	0	0	0	0	0	0	0	0	0	0	0	0	0	0	0	0	0	0	0.56191	0	1.37233	0	0
FBgn0027948	msps	protein_coding	3R	34.0607	35.3963	46.2586	42.0072	99.8098	87.7425	79.188	73.1604	57.4922	65.0602	47.9769	63.3133	39.9234	18.2628	19.0018	41.2083	21.358	13.7511	16.0435	22.2325	27.5327	17.8618	27.6804	25.1577	50.1788	64.1097	71.4712	52.0811	29.7917	28.4883	23.3247	38.7229	13.6679	17.5336	9.06591	7.80435	26.4544	11.6358	4.79755	2.6905	18.619	21.3526	15.6935	19.2126	40.8653	56.6136
FBgn0038675	CG6013	protein_coding	3R	2.12879	9.23381	13.0102	7.7156	8.19335	9.57191	13.3287	11.516	3.70917	8.59286	10.7411	3.7799	4.31604	2.43504	4.75045	7.84919	7.34182	10.5155	14.8975	16.6743	4.44076	10.2067	2.12926	5.03154	29.271	17.4845	20.2943	25.5299	14.8959	8.37891	10.4961	15.1114	7.40344	3.37185	10.1991	14.308	14.8806	6.34683	7.99592	13.4525	2.32737	5.6191	14.4863	9.6063	23.9555	27.1514
FBti0019591		transposable_element	X	0	0	0	0	0	0	0	0	0	0	0	0	0	0	0	0	0	0	0	0	0	0	2.12926	0	0	0	0	0	0	0	0	0	0	0.674369	0	0	0	0	0	0	0	0	0	0	0	0
FBgn0034315	CG5721	protein_coding	2R	7.45078	10.7728	7.2279	3.42916	12.6624	9.17308	16.4648	6.0967	5.56376	9.20664	5.01251	4.72487	4.31604	3.65256	3.16697	1.9623	9.34413	6.4711	5.72981	6.94764	16.8749	10.2067	14.9048	8.3859	15.3324	18.4558	19.4119	22.4663	12.7679	8.37891	6.99742	6.61123	17.6544	8.09243	5.66619	6.50363	3.3068	9.52024	4.79755	8.07151	18.619	12.9239	9.65755	12.351	26.0692	11.5538
FBgn0264900	lncRNA:CR44091	ncRNA	3R	0	0	0	0	0	0	0	0	0	0	0	0	0	0	0	0	0	0	0	0	0	0	0	0	0	0	0	0	0	0	0	0	0	0	0	0	0	0	0	0	0	0	0	0	0	0
FBgn0000500	Dsk	protein_coding	3R	0	0	0	0	0	0	0	0	0	0	0	0	0	0	0	0	0	0	0	0	0	0	0	0	0	0	0	0	0	0	0	0	0	0	0	0	0	0	0	0	0	0	0	0	0	0
FBgn0030319	CG2533	protein_coding	X	0	0	0	0	0	0	0	0	0	0.613776	0	0	0	0	0	0	0	0	0	0	0	0	0	0	0	0	0	0	0	0	0	0	0.569496	0	1.13324	0	0	0	0	0	0	0.56191	0	1.37233	0	0
FBgn0029878	Pat1	protein_coding	X	27.6743	23.0845	21.6837	20.5749	47.6704	45.0677	45.4743	50.8058	29.0552	29.4612	26.4947	23.6244	9.71109	18.2628	7.91742	13.7361	14.6836	10.5155	8.02173	13.8953	7.99337	10.2067	10.6463	10.0631	30.6648	38.8544	39.7062	35.7419	18.0878	10.0547	10.4961	8.50015	10.2509	6.74369	9.06591	10.4058	4.96019	10.578	14.3927	18.8335	23.2737	14.6097	9.65755	30.1912	28.8875	16.1753
FBgn0026324	Taf10b	protein_coding	2L	5.32199	3.07794	4.33674	5.14373	5.21395	3.19064	4.70424	6.0967	1.85459	2.4551	1.43215	5.66985	3.23703	1.21752	0	1.9623	2.66975	2.42666	4.58384	2.77906	2.66446	5.10336	6.38777	6.70872	5.57542	8.74223	7.05888	10.212	4.25596	5.02735	3.49871	3.77785	1.70849	2.69748	1.13324	2.60145	13.2272	3.17341	4.79755	5.381	4.65475	2.80955	3.62158	2.74466	7.75031	6.93227
FBgn0031255	BBS8	protein_coding	2L	0	0	0	0	0	0	0	0	0	0	0	0	0	0	0	0	0	0	0	0	0	0	0	0	0	0	0	0	0	0	0	0	0	0	0	0	0	0	0	0	0	0	0	0	0	0
FBgn0000566	Eip55E	protein_coding	2R	20.2235	1.53897	11.5646	8.57289	5.21395	2.79181	2.35212	4.06446	27.8188	19.6408	19.334	24.5693	12.9481	13.3927	14.2514	35.3214	4.67207	0.808887	9.16769	6.94764	9.76967	17.8618	8.51703	13.4174	2.78771	5.82815	3.52944	6.12718	27.6637	31.8399	18.6598	27.3894	19.3628	20.2311	18.1318	19.5109	4.96019	1.0578	1.59918	8.07151	3.10316	10.6763	14.4863	8.23397	4.93202	4.62152
FBti0020188		transposable_element	3L	0	0	0	0	0	0	0	0	0.618195	0	0	0	0	0	0	1.9623	0	0	0	0	0	0	0	0	0	0	0	0	0	0	0	0	0	0	0	1.30073	0	0	0	0	0	0	0	0	0	0
FBgn0036597	CG4962	protein_coding	3L	0	0	0	0	0	0	0	0	0	0	0	0	8.63208	10.9577	22.1688	19.623	6.67438	10.5155	6.87577	15.2848	0	0	0	0	0	0	0	0	0	0	0	0	9.68142	15.5105	10.1991	19.5109	33.068	12.6937	97.5502	29.5955	0	0	0	0	0	0
FBgn0033019	CG10395	protein_coding	2R	2.12879	3.07794	7.2279	4.28645	3.72425	5.58361	5.48828	3.38705	6.80015	7.97908	13.6054	4.72487	3.23703	3.65256	3.16697	5.8869	16.0185	8.08887	9.16769	5.55812	5.32891	1.27584	2.12926	0	2.78771	0.971359	3.52944	4.08479	1.06399	0	3.49871	6.61123	2.84748	1.34874	1.13324	2.60145	8.26699	11.6358	1.59918	0	2.32737	2.80955	1.20719	2.74466	2.8183	1.73307
FBgn0267986	lncRNA:CR46253	ncRNA	2L	0	0	0	0	0	0	0	0	0	0	0	0	0	0	0	0	0	0	0	0	0	0	0	0	0	0	0.88236	0	0	0	0	0	0	0	0	0	1.6534	0	0	0	0	0	0	0	0	0
FBgn0260986	mei-38	protein_coding	X	0	0	0	0	0	0	0	0	0	0	0	0	0	0	0	0	0	0	0	0	0	0	0	0	2.78771	0	0	0	0	0	0	0	0	0	0	0	0	0	0	0	0	0	0	0	0	0
FBti0062408		transposable_element	2R	0	0	0	0	0	0	0	0	0.618195	0	0	0.944975	0	0	0	0	0	0	0	0	0	0	0	0	0	0	0	0	0	0	0	0	0	0	0	0	0	0	0	0	0	0	0	0	0	0
FBti0061285		transposable_element	3L	0	0	0	0	0	0	0	0	0	0	0	0.944975	1.07901	0	0	0	0	0	0	0	0	0	0	0	0	0	0	0	0	0	0	0	0	0.674369	0	0	0	0	0	0	0	0	0	0	0	0
FBgn0035921	CG13305	protein_coding	3L	0	0	0	0	0	0	0	0	0	0	0	0	0	0	0	0	0	0	0	0	0	0	0	0	0	0	0	0	0	0	1.16624	0	0	0	1.13324	0	3.3068	0	0	0	0	0	0	0	0.704574	0.577689
FBgn0003448	sna	protein_coding	2L	0	0	0	0	0	0	0.784039	0	0	0	0	0	0	0	0	0	0	0	0	0	0	0	0	0	0	0	0	0	0	0	0	0	0	0	0	0	0	0	0	0	0	0	0	0	0	0
FBgn0040747	CG12853	protein_coding	2R	0	0	0	0	0	0	0	0	0	0	0	0	0	0	0	0	0.667438	0	0	0	0	0	0	0	0	0	0	0	0	0	0	0	0	0	0	0	0	0	0	0	0	0	0	0	0	0
FBgn0036211	CG5946	protein_coding	3L	10.644	0	2.89116	7.7156	8.93819	11.9649	14.8967	14.2256	34.6189	27.0061	27.2108	30.2392	50.7135	86.4438	45.921	70.6427	9.34413	10.5155	11.4596	13.8953	2.66446	6.3792	8.51703	25.1577	18.1201	18.4558	9.70596	16.3392	35.1117	23.461	18.6598	24.556	68.909	66.0882	73.6605	66.337	4.96019	9.52024	4.79755	16.143	6.20633	5.05719	10.8647	0	13.3869	15.0199
FBgn0036090	CG8009	protein_coding	3L	6.38638	3.07794	7.2279	3.42916	12.6624	6.7801	7.84039	5.41929	10.5093	6.75153	15.7536	14.1746	11.8691	14.6102	12.6679	9.81149	5.3395	8.08887	3.43788	12.5058	8.88152	8.93088	10.6463	6.70872	9.75699	9.71359	8.8236	16.3392	11.7039	8.37891	4.66495	9.44461	5.69496	8.7668	7.93267	9.10508	1.6534	4.23122	4.79755	2.6905	4.65475	6.18101	3.62158	8.23397	16.2052	10.3984
FBgn0020307	dve	protein_coding	2R	0	0	0	0	0	0	0	0	0	0	0	0	0	0	0	0	0	0	0	0	0	0	0	0	0	0	0	0	0	0	0	0	0	0	0	0	0	0	0	0	0	0	0	0	0	0
FBgn0031268	cold	protein_coding	2L	1.0644	3.07794	2.89116	6.85831	12.6624	13.1614	10.1925	14.903	1.23639	1.22755	1.43215	1.88995	0	1.21752	0	3.9246	1.33488	1.61777	6.87577	0	1.7763	2.55168	4.25852	0	1.39386	1.94272	1.76472	1.0212	1.06399	0	0	0.944461	0	0.674369	1.13324	0	1.6534	0	1.59918	0	1.55158	0.56191	0	1.37233	10.5686	5.77689
FBgn0027495	Smyd4-4	protein_coding	2R	6.38638	1.53897	4.33674	6.00102	20.1109	13.959	15.6808	16.9353	31.528	24.551	23.6304	24.5693	16.1852	10.9577	11.0844	5.8869	4.67207	8.08887	5.72981	5.55812	2.66446	2.55168	0	1.67718	8.36313	13.599	18.5296	15.318	19.1518	18.4336	11.6624	13.2225	11.3899	10.1155	15.8653	9.10508	1.6534	6.34683	3.19837	5.381	4.65475	5.6191	4.82878	0	4.22744	8.66534
FBgn0003378	Sgs8	protein_coding	3L	25.5455	0	0	0	0	0	0	0	0	0	0	0	0	0	0	0	0	0	0	0	0	0	0	0	0	0	0	0	0	0	0	0	0	0	0	0	0	0	0	0	0	0.56191	1.20719	0	0	0
FBti0060049		transposable_element	X	0	0	0	0	0	0	0	0	0	0	0	0	0	0	0	0	0	0	0	0	0	0	0	0	0	0	0	0	0	0	0	0	0	0	0	0	0	0	0	0	0	0	0	0	0	0
FBti0020084		transposable_element	3L	0	0	0	0	0.74485	0	0	0	0	0	0	0	0	0	0	0	0	0	0	0	0	0	0	0	0	0	0	0	0	0	0	0	0	0	0	0	0	0	0	0	0	0	0	0	0	0
FBgn0037610	CG8043	protein_coding	3R	0	0	2.89116	2.57187	1.4897	0	0	0	0	3.68265	0	0.944975	1.07901	0	1.58348	0	1.33488	2.42666	0	0	0	1.27584	0	0	4.18157	0.971359	0.88236	0	1.06399	0	0	0.944461	0.569496	0	1.13324	2.60145	0	1.0578	0	0	2.32737	0	0	1.37233	0.704574	0
FBti0063379		transposable_element	4	0	0	0	0	0	0	0	0	0	0	0	0	0	0	0	0	0	0	0	0	0	0	0	0	0	0	0	0	0	0	0	0	0	0	0	0	0	0	0	0	0	0	0	0	0	0
FBti0019585		transposable_element	X	0	0	0	0	0	0	0	0	0	0	0	0	0	0	0	0	0	0	0	0	0	0	0	0	0	0	0	0	0	0	0	0	0	0	0	0	0	0	0	0	0	0	0	0	0	0
FBgn0037120	CG11247	protein_coding	3L	4.25759	6.15588	1.44558	6.00102	5.9588	4.38712	6.27232	10.1612	11.1275	11.6617	7.8768	8.50477	2.15802	7.30511	6.33393	3.9246	6.00694	2.42666	5.72981	2.77906	6.21706	1.27584	2.12926	1.67718	6.96928	2.91408	7.94124	7.14838	18.0878	11.7305	9.32989	8.50015	3.98647	4.04622	4.53295	5.2029	4.96019	4.23122	1.59918	5.381	7.75791	6.74292	7.24316	8.23397	3.52287	4.04383
FBti0018872		transposable_element	2R	0	0	0	0	0	0	0	0	0	0	0	0	0	0	0	0	0	0	0	0	0	0	0	0	0	0	0	0	0	0	1.16624	0	0	0	0	0	0	0	0	0	0	0	0	0	0	0
FBgn0262111	f	protein_coding	X	0	0	0	0.857289	0	0	0	0	0.618195	0.613776	0.716073	0	0	0	0	0	0	0	0	0	0	0	0	0	0	1.94272	0	0	0	1.67578	0	0	0	0.674369	0	0	0	0	0	0	1.55158	0	0	2.74466	0	0.577689
FBgn0263855	BubR1	protein_coding	2R	0	0	0	0	0.74485	0.39883	0	2.03223	0	0.613776	0	0	0	0	0	0	0	0	0	0	0	0	0	0	1.39386	0	0	0	0	1.67578	0	0	0	0	0	1.30073	0	0	0	0	0	0	0	0	0.704574	0.577689
FBti0060942		transposable_element	2R	0	0	0	0	0	0	0	0	0	0	0	0	0	0	0	0	0	0	0	0	0	0	0	0	0	0.971359	0	0	0	0	0	0	0	0	0	0	0	0	0	0	0	0	0	0	0	0
FBgn0033247	Nup44A	protein_coding	2R	1.0644	4.61691	2.89116	2.57187	5.9588	5.98244	6.27232	12.8708	6.80015	13.5031	14.3215	15.1196	5.39505	4.87007	4.75045	5.8869	0.667438	2.42666	0	1.38953	4.44076	2.55168	4.25852	3.35436	13.9386	10.6849	4.4118	7.14838	15.9599	6.70313	8.16366	12.278	3.98647	6.74369	2.26648	7.80435	1.6534	6.34683	0	10.762	4.65475	3.37146	8.45036	2.74466	14.0915	11.5538
FBgn0031127	CG1835	protein_coding	X	1.0644	0	0	0	0.74485	0	1.56808	0	0	0	0	0	0	0	0	0	0	0	0	0	0	1.27584	0	0	1.39386	0	0	1.0212	0	0	0	0	0	0	0	0	0	0	0	2.6905	0.775791	0	0	0	0	0
FBgn0262896	CG43251	protein_coding	3L	0	0	0	0	0	0	0	0	0	0	0	0	0	0	0	0	0	0	0	0	0	0	0	0	0	0	0	0	0	0	0	0	0	0	0	0	0	2.11561	0	0	0	0	0	0	0	0
FBgn0053914	CG33914	protein_coding	2R	0	0	0	0	0	0	0	0	0	0	0	0	0	1.21752	0	0	0	0	0	0	0	0	0	0	0	0	0	0	0	0	0	0	0	0	0	0	0	0	0	0	0	0	0	0	0	0
FBgn0263802	lncRNA:CR43605	ncRNA	2R	0	0	0	0	0	0	0	0	0	0	0	0	0	0	0	0	0	0	0	0	0	0	0	0	0	0	0	0	0	0	0	0	0	0	0	0	0	0	0	0	0	0	0	0	0	0
FBgn0267590	asRNA:CR45928	ncRNA	2R	0	0	0	0	0	0	0	0	0	0	0	0	0	0	0	0	0	0	1.14596	0	0	0	0	0	0	0	0	0	0	0	0	0	0	0.674369	0	0	0	0	0	0	0	0	0	0	0	0
FBgn0033490	CG12917	protein_coding	2R	0	0	0	0	0	0.39883	0	0	0	0	0	0	0	0	0	0	0	0	0	0	0	0	0	0	0	0	0	0	0	0	0	0	0	0	0	0	1.6534	0	0	0	0	0	0	0	0	0
FBgn0038070	CG6753	protein_coding	3R	0	1.53897	0	0.857289	0	0	0	0	0	0	0	0.944975	0	0	4.75045	0	0	0	0	0	0.888152	0	2.12926	0	0	0	0	0	0	0	0	0	0	0	0	0	0	0	0	0	4.65475	2.80955	2.41439	2.74466	0	0
FBgn0085294	CG34265	protein_coding	3L	0	0	0	0	0.74485	0	1.56808	1.35482	0	0	0	0	0	0	0	0	0	0	0	0	0	1.27584	0	0	0	0.971359	0	0	0	0	0	0	0	0	0	0	0	0	0	0	0	0	0	0	0	0
FBti0061444		transposable_element	4	0	0	0	1.71458	0	0	0.784039	0	0	0.613776	0.716073	0	0	2.43504	0	0	0	0	0	0	0	0	0	0	0	0	0	0	0	0	0	0	0	0	0	0	0	0	0	0	0	0.56191	0	0	0	0
FBgn0030912	CG6023	protein_coding	X	3.19319	3.07794	1.44558	5.14373	0.74485	3.19064	0	0	1.85459	0.613776	0.716073	0.944975	1.07901	0	0	0	0	0	0	0	1.7763	0	0	3.35436	0	0.971359	0	1.0212	2.12798	0	0	0	0	0	0	0	0	0	0	0	0.775791	1.68573	1.20719	0	0	0
FBgn0261859	CG42788	protein_coding	3R	6.38638	3.07794	7.2279	6.85831	5.21395	5.18478	2.35212	6.77411	4.94556	6.75153	6.44466	5.66985	0	1.21752	1.58348	3.9246	0.667438	2.42666	5.72981	5.55812	5.32891	2.55168	0	0	2.78771	3.88544	3.52944	10.212	5.31995	5.02735	4.66495	11.3335	1.13899	0	1.13324	2.60145	1.6534	4.23122	4.79755	0	2.32737	5.05719	1.20719	4.11698	2.8183	5.77689
FBgn0034081	CG10731	protein_coding	2R	3.19319	0	2.89116	0	0.74485	0	0	0.677411	1.23639	0.613776	0	0.944975	2.15802	2.43504	1.58348	1.9623	0	0.808887	0	1.38953	1.7763	1.27584	4.25852	0	1.39386	0	0.88236	0	4.25596	1.67578	1.16624	1.88892	3.98647	4.04622	1.13324	1.30073	1.6534	1.0578	0	0	1.55158	3.93337	8.45036	0	1.40915	2.88845
FBgn0037363	Atg17	protein_coding	3R	25.5455	63.0977	50.5953	53.1519	63.3122	65.8069	70.5635	69.7733	15.4549	15.9582	18.6179	17.0095	11.8691	14.6102	15.8348	5.8869	110.127	89.7865	76.7794	95.8775	39.0787	38.2752	23.4218	25.1577	37.6341	23.3126	26.4708	24.5087	5.31995	5.02735	11.6624	6.61123	10.8204	11.4643	11.3324	6.50363	127.312	103.665	91.1535	83.4056	10.0853	7.86674	4.82878	15.0956	2.8183	8.08765
FBgn0267581	lncRNA:CR45921	ncRNA	3L	0	0	0	0	0	0	0	0	0	0	0	0	0	0	0	0	0	0	0	0	1.7763	0	0	0	0	0	0	0	0	0	0	0	0	0	0	0	0	0	0	0	0	0	0	0	0	0
FBti0061606		transposable_element	X	0	0	0	0	0	1.19649	0	0	0.618195	0.613776	0	0	0	2.43504	0	0	0	0	1.14596	0	1.7763	0	0	1.67718	1.39386	1.94272	0	1.0212	3.19197	0	0	0.944461	3.41697	2.69748	0	0	0	0	0	0	0	2.24764	2.41439	4.11698	4.93202	3.46614
FBgn0032929	Mcm10	protein_coding	2L	0	0	0	0	0	0	0	0	0	0	0	0	0	0	0	0	0.667438	0	0	1.38953	0	0	0	0	0	0	0	0	0	0	0	0	0	0	0	0	0	0	0	0	0	0	0	0	0	0
FBgn0024179	wit	protein_coding	3L	0	0	0	0	2.23455	0.797659	1.56808	0	4.32737	3.68265	2.86429	6.61482	0	0	0	0	0.667438	0	1.14596	0	0	1.27584	0	0	1.39386	1.94272	0.88236	1.0212	1.06399	3.35157	2.33247	0	2.27798	0	0	0	0	0	0	0	0	0	0	1.37233	0	2.31076
FBti0019502		transposable_element	4	0	0	0	0	0	0	0.784039	0	0	0	0	0.944975	0	0	0	0	0.667438	0	0	0	0	0	0	0	0	0	0.88236	0	0	0	0	0	0	0	0	0	0	0	1.59918	0	0	0	1.20719	0	0	0
FBgn0283471	wupA	protein_coding	X	13169.8	3887.44	6892.53	5178.03	23.0903	20.7391	10.9766	13.5482	1448.43	1315.32	1394.19	1560.15	11765.5	13088.3	11879.3	9729.08	2348.05	3439.39	5796.27	3322.36	662.561	2087.27	764.404	1990.81	32.0587	47.5966	37.0591	27.5723	640.522	521.168	629.768	514.731	3078.12	3278.11	2980.42	3427.41	4244.27	3508.74	5961.76	3562.22	444.528	809.713	2421.63	318.38	86.6626	45.0598
FBgn0034785	CG3649	protein_coding	2R	0	0	0	0	2.9794	2.39298	1.56808	0.677411	0	0	0	0	0	0	0	0	0	0	0	0	0	0	0	0	1.39386	1.94272	2.64708	1.0212	0	0	0	0	0	0	0	0	0	0	0	0	0.775791	0	1.20719	0	1.40915	0
FBgn0039732	CG15525	protein_coding	3R	1.0644	0	0	1.71458	2.9794	1.99415	0.784039	3.38705	0	0	0.716073	0	1.07901	1.21752	1.58348	0	2.00231	0	3.43788	0	0.888152	0	4.25852	0	4.18157	0.971359	0.88236	3.06359	0	0	1.16624	0.944461	1.13899	0.674369	0	0	0	0	0	0	1.55158	0	1.20719	0	5.63659	2.88845
FBgn0038224	ATPsynE	protein_coding	3R	216.073	43.0911	106.973	70.2977	14.897	7.97659	6.27232	12.1934	58.1104	52.7847	56.5698	68.0382	174.8	159.495	155.181	194.268	72.7507	114.862	176.478	133.395	31.0853	113.55	36.1974	144.237	11.1508	3.88544	2.64708	6.12718	40.4316	36.8672	37.3196	51.9454	150.916	174.662	147.321	214.62	49.6019	51.8324	94.3518	83.4056	13.9642	34.2765	79.6748	9.6063	10.5686	8.08765
FBgn0040393	CG14265	protein_coding	X	0	0	0	0.857289	0	0	0	0	0	0	0	0	0	0	3.16697	0	0	0	0	0	0	0	0	0	0	0	0	0	0	0	0	0	0.569496	1.34874	0	2.60145	0	0	0	0	0	1.12382	0	0	0	0
FBti0019146		transposable_element	2L	0	0	0	0	0	0	0	0	0	0	0	0	0	0	1.58348	0	0	0.808887	0	0	0	0	0	0	0	0	0	0	0	0	0	0	0	0	0	0	0	0	0	2.6905	0	0	0	0	0.704574	0
FBgn0264776	CG44014	protein_coding	3R	0	0	0	0	0	0	0	0	0	0	0	0	6.47406	0	1.58348	3.9246	8.00926	15.3689	13.7515	11.1162	0	0	0	0	0	0	0	0	0	0	0	0	4.55596	2.02311	1.13324	1.30073	0	2.11561	0	29.5955	0	0	0	0	0	0
RR48340_transposable_element		transposable_element	2R	1.0644	0	1.44558	0	0.74485	0.797659	0.784039	0	1.23639	0.613776	0	0	5.39505	0	0	0	0	0.808887	0	0	0.888152	0	0	5.03154	4.18157	0	0.88236	0	1.06399	0	1.16624	2.83338	1.70849	1.34874	1.13324	0	1.6534	2.11561	1.59918	0	3.87895	0	0	6.86164	4.22744	0
FBgn0025643	CG3588	protein_coding	X	5.32199	1.53897	5.78232	17.1458	0	0	0	0	0	0	0	0	0	0	0	0	0	0	0	0	1.7763	20.4134	6.38777	6.70872	0	0	0	1.0212	0	0	0	0	0	0	0	0	0	0	0	0	0.775791	2.24764	0	1.37233	0	0
FBgn0020906	Jon25Bi	protein_coding	2L	0	0	0	0	0	0	0	0	0	0	0	0	0	0	0	0	0	0	0	0	0	0	0	0	0	0	0	0	0	0	0	0	0	0	0	0	0	0	0	0	0.775791	0	0	0	0	0
FBti0061813		transposable_element	X	0	0	0	0	0	0	0	0	0	0	0	0	0	0	0	0	0	0	0	0	0	0	0	0	0	0	0	0	0	0	0	0	0	0	0	0	0	0	0	0	0	0	0	0	0	0
FBgn0086078	snoRNA:Me28S-A774b	snoRNA	3L	0	0	0	0	0	0	0	0	0.618195	0	0	0	0	0	0	0	0	0	0	0	0	0	0	0	0	0	0	0	0	0	0	0	0	0	0	0	0	0	0	0	0	0	0	0	0	0
FBgn0035510	Cpr64Aa	protein_coding	3L	0	0	0	0	0	0	0	0	0	0	0	0.944975	11.8691	7.30511	7.91742	13.7361	16.0185	32.3555	40.1086	33.3487	0	0	0	0	0	0	0	0	0	0	0	0	4.55596	4.72059	9.06591	13.0073	38.0281	42.3122	84.7567	59.191	0	0	0	0	0.704574	1.15538
FBgn0034366	Atg7	protein_coding	2R	7.45078	138.507	26.0204	26.576	23.8352	21.9356	17.2489	17.6127	3.09098	1.22755	1.43215	1.88995	0	0	0	0	1.33488	3.23555	0	0	127.006	6.3792	53.2314	11.7403	29.271	39.8257	29.1179	35.7419	2.12798	1.67578	2.33247	0.944461	1.70849	2.69748	2.26648	1.30073	0	2.11561	3.19837	5.381	150.503	23.0383	22.9367	94.6906	21.1372	32.3506
FBti0019351		transposable_element	3R	0	0	0	0	0	0	0	0	0	0	0	0.944975	0	0	0	0	0	0	0	0	0	0	0	0	0	0	0	0	0	0	0	0	0	0	0	0	0	0	0	0	0	0	0	0	0	0
FBti0063660		transposable_element	3L	0	0	0	0	0	0	0	0	0	0	0	0	0	0	0	0	0.667438	0	0	1.38953	0	0	0	0	0	0	0	0	0	0	0	0	0	0	0	0	0	0	0	0	0	0	0	0	0	0
FBgn0265982	lncRNA:CR44761	ncRNA	2R	0	0	0	0	0	0	0	0	0	0	0	0	0	0	0	0	0	0	0	0	0	0	0	0	0	0	0	0	0	0	0	0	0	0	0	0	0	0	0	0	0	0	0	0	0	0
FBgn0034470	Obp56d	protein_coding	2R	17.0304	424.755	93.9627	402.926	0	0	0	0	0	0	0	2.83492	1.07901	0	0	0	0	0	0	0	15.9867	42.1027	8.51703	1.67718	0	0	0	0	0	0	1.16624	0	0	0	0	0	0	0	0	0	6.98212	5.05719	12.0719	2.74466	0	0
FBgn0261436	DhpD	protein_coding	3R	0	0	1.44558	0	0.74485	1.59532	2.35212	2.03223	0	3.68265	0.716073	0	1.07901	0	3.16697	0	8.00926	19.4133	12.6056	12.5058	0	0	2.12926	0	0	0	1.76472	6.12718	0	0	2.33247	0	4.55596	0.674369	4.53295	0	0	8.46244	0	0	0	0	0	1.37233	0	1.15538
FBgn0034666	CG9294	protein_coding	2R	0	0	0	0	0	0	0	0	0	0	0	0	0	0	0	0	0	0	0	0	0	0	0	0	0	0	0	0	0	0	0	0	0	0	0	0	0	0	0	0	0	0.56191	0	0	0	0
FBgn0033869	Cpr50Cb	protein_coding	2R	0	0	0	0	0	0	0	0	0	0	0	0	0	0	0	0	0	0	0	0	0	0	0	0	0	0	0	0	0	0	0	0	0	0	0	1.30073	0	1.0578	0	0	0	0	0	0	0	0
FBti0062678		transposable_element	4	0	0	0	0	0	0	0	0	0	0	0	0	0	0	0	0	0	0	0	0	0	0	0	0	0	0	0.88236	0	0	0	0	0	0	0	0	0	0	0	0	0	0	0	0	0	0	0.577689
FBgn0266929	lncRNA:CR45380	ncRNA	3L	0	0	0	0.857289	0	0	0	0	0	0	0	0	0	0	0	0	0	0	0	0	0	0	0	0	0	0	0	0	0	0	0	0.944461	0	0	0	0	0	1.0578	1.59918	0	0	0.56191	0	0	0	0
FBgn0031238	CG3645	protein_coding	2L	0	0	0	0.857289	1.4897	1.99415	3.13616	2.03223	11.1275	3.68265	7.8768	2.83492	4.31604	0	3.16697	1.9623	0	0	1.14596	0	0	5.10336	0	3.35436	2.78771	0.971359	4.4118	0	7.44793	1.67578	2.33247	5.66677	3.41697	1.34874	1.13324	0	1.6534	0	0	0	3.87895	1.68573	0	0	2.11372	1.73307
FBgn0037151	CG7130	protein_coding	3L	2.12879	3.07794	5.78232	11.1448	0.74485	0.39883	0	2.70964	0.618195	0.613776	0	0.944975	0	0	0	0	6.67438	8.08887	2.29192	6.94764	2.66446	6.3792	4.25852	1.67718	0	0	1.76472	0	0	3.35157	2.33247	1.88892	0	0.674369	1.13324	0	14.8806	23.2717	9.5951	24.2145	2.32737	11.8001	6.03597	4.11698	0.704574	2.88845
FBgn0036242	CG6793	protein_coding	3L	0	0	0	0	0	0.797659	0	0	0	0	0	0	0	0	0	0	0	0	0	0	0	0	0	0	0	0	0	0	0	0	0	0	0	0	0	0	0	0	0	0	0	0	0	0	0.704574	0.577689
FBgn0032744	Ttc19	protein_coding	2L	2.12879	1.53897	1.44558	0	0	0	0	0.677411	0	0	1.43215	0	6.47406	3.65256	4.75045	0	0	0	0	0	0	0	0	0	1.39386	0	0	1.0212	3.19197	1.67578	1.16624	0	1.70849	2.02311	0	0	0	0	0	0	0	0	0	0	0.704574	0
FBgn0033192	Corin	protein_coding	2R	0	0	0	0	0	1.19649	0	0.677411	0.618195	0	2.14822	0	0	0	0	1.9623	0	0	0	0	0	0	0	0	1.39386	1.94272	0.88236	2.04239	2.12798	3.35157	1.16624	2.83338	1.70849	0	3.39972	0	0	0	1.59918	0	0	0	0	0	2.8183	2.88845
FBti0019805		transposable_element	2L	0	0	0	0	0	0	0	0	0	0	0	0	0	0	0	0	0	0	0	0	0	0	0	0	0	0	0	0	0	0	0	0	0	0	0	0	0	0	0	0	0	0	0	0	0	0
FBgn0010314	Cks30A	protein_coding	2L	0	0	0	0	2.9794	2.39298	1.56808	2.03223	0.618195	0	0	0	0	0	0	3.9246	0	0	0	0	0	0	0	0	1.39386	0.971359	2.64708	1.0212	0	0	0	0	0	0	0	0	0	0	0	0	1.55158	0	2.41439	1.37233	2.11372	0.577689
FBgn0038814	CG15923	protein_coding	3R	0	0	0	0	0	0	0	0	0	0	0	0	0	0	0	0	0	0	0	0	0	0	0	0	0	0	0	0	0	0	0	0	0	0	0	0	0	0	0	0	0	0	0	0	0	0
FBgn0027496	epsilonCOP	protein_coding	2L	1.0644	1.53897	7.2279	3.42916	4.4691	4.38712	2.35212	2.70964	0.618195	0	2.86429	1.88995	0	2.43504	6.33393	3.9246	15.3511	12.9422	10.3137	9.7267	7.99337	1.27584	8.51703	1.67718	2.78771	5.82815	7.05888	7.14838	2.12798	3.35157	1.16624	1.88892	2.84748	6.06932	1.13324	5.2029	6.61359	11.6358	9.5951	2.6905	3.87895	1.68573	2.41439	2.74466	3.52287	5.1992
FBgn0030616	RpL37a	protein_coding	X	371.475	241.618	303.572	198.034	61.0777	83.7542	80.7561	75.1926	280.661	227.711	280.701	327.906	252.488	294.639	281.86	341.44	248.287	291.199	332.329	327.929	443.188	469.509	702.655	610.493	151.93	158.332	164.119	124.586	525.611	395.485	558.627	498.676	378.145	442.386	458.962	645.16	424.923	373.405	406.193	470.838	545.381	522.015	720.695	467.964	317.763	314.263
FBgn0265575	yin	protein_coding	X	2.12879	52.3249	11.5646	19.7176	0	0.797659	0	0.677411	0	0	0	0	0	0	0	0	0	0	0	0	25.7564	12.7584	17.0341	3.35436	1.39386	0	1.76472	0	0	0	1.16624	0	0	0	0	0	0	0	0	0	1.55158	2.80955	2.41439	2.74466	0.704574	0
FBgn0286871	lncRNA:CR46393	ncRNA	3R	0	0	0	0	0	0	0	0	0	0	0	0	0	0	0	0	0	0.808887	0	0	0	0	0	0	0	0	0	0	0	0	0	0	0	0	0	0	0	0	0	0	0	0	0	0	0	0
FBgn0058298	CG40298	protein_coding	3L	8.51518	0	2.89116	0.857289	0	0	0	0	0	0.613776	1.43215	0.944975	6.47406	7.30511	9.5009	13.7361	0	0	0	0	0	7.65504	0	1.67718	0	0	1.76472	1.0212	2.12798	1.67578	2.33247	0	6.26445	11.4643	1.13324	10.4058	0	1.0578	0	2.6905	0.775791	0.56191	1.20719	0	0.704574	0
FBgn0267809	asRNA:CR46134	ncRNA	3R	0	0	0	0	0	0	0	0	0.618195	0	0	0	0	0	0	0	0	0	0	0	0	0	0	0	0	0	0	0	0	0	0	0	0	0	0	0	0	0	0	0	0	0	0	0	0	0
FBgn0001987	Gli	protein_coding	2L	3.19319	4.61691	2.89116	12.002	46.1807	44.6689	30.5775	46.0639	0.618195	0.613776	0	0.944975	0	0	1.58348	1.9623	1.33488	1.61777	1.14596	4.16859	5.32891	5.10336	6.38777	0	4.18157	9.71359	11.4707	4.08479	0	0	4.66495	0.944461	0	0.674369	0	1.30073	0	2.11561	3.19837	0	6.20633	0.56191	1.20719	1.37233	11.9778	7.50996
FBgn0038279	Sdr	protein_coding	3R	0	0	0	0	0	0	0	0	0	0	0	0	0	0	0	0	0	0	0	0	0	0	0	0	0	0	0	0	0	0	0	0	0	0	0	0	0	0	0	0	0	0	0	0	0	0
FBgn0031306	CG4577	protein_coding	2L	0	1.53897	0	1.71458	0	0	0	0	0	0	0	0	0	0	0	0	0	0	0	0	5.32891	0	0	0	0	0	0	0	1.06399	0	0	0	0	0.674369	0	0	0	0	0	0	2.32737	0	0	1.37233	0.704574	0
FBgn0025807	Rad9	protein_coding	3L	0	0	0	0	0	0	0.784039	0.677411	1.23639	1.84133	1.43215	0	0	0	0	0	0.667438	0	0	0	0	0	0	0	2.78771	0.971359	0.88236	1.0212	0	1.67578	0	0	0	0	0	1.30073	0	0	0	0	0.775791	0	0	1.37233	1.40915	1.15538
FBgn0264501	lncRNA:CR43900	ncRNA	2R	1.0644	0	1.44558	0	0	0.39883	0.784039	0	0	0	0	0	0	0	0	0	0	0	0	0	0	1.27584	0	0	0	0	0	0	1.06399	1.67578	1.16624	1.88892	0	1.34874	0	0	0	0	0	0	0.775791	0	0	0	0	0
FBgn0028421	Kap3	protein_coding	X	2.12879	4.61691	8.67348	4.28645	5.9588	3.58947	7.05635	3.38705	3.09098	3.68265	3.58036	0	0	1.21752	0	5.8869	4.00463	8.08887	4.58384	0	9.76967	5.10336	4.25852	1.67718	6.96928	2.91408	9.70596	7.14838	6.38394	6.70313	3.49871	4.72231	4.55596	6.74369	6.79943	2.60145	3.3068	16.9249	11.1943	5.381	10.8611	6.74292	8.45036	13.7233	11.9778	3.46614
FBgn0001108	DCTN1-p150	protein_coding	3L	10.644	9.23381	11.5646	11.1448	6.70365	7.97659	9.40847	9.48375	3.09098	4.29643	6.44466	3.7799	6.47406	4.87007	6.33393	3.9246	15.3511	15.3689	19.4813	11.1162	26.6446	31.896	10.6463	5.03154	5.57542	8.74223	7.94124	5.10599	20.2158	10.0547	13.9948	11.3335	17.0849	19.5567	22.6648	24.7138	38.0281	32.7919	35.182	29.5955	16.2916	20.7907	16.9007	19.2126	6.34117	5.1992
FBgn0011741	Arp6	protein_coding	X	11.7084	3.07794	11.5646	6.85831	11.1727	8.37542	12.5446	9.48375	11.7457	14.1168	10.7411	15.1196	4.31604	9.74015	9.5009	7.84919	6.00694	3.23555	8.02173	1.38953	5.32891	14.0342	6.38777	11.7403	11.1508	11.6563	11.4707	11.2332	11.7039	10.0547	13.9948	13.2225	10.8204	9.44117	6.79943	9.10508	3.3068	5.28902	4.79755	0	7.75791	10.6763	16.9007	13.7233	11.9778	20.7968
FBgn0053093	CG33093	protein_coding	3R	0	0	0	0	0	0.39883	0	0	0	0	0	0	0	0	0	0	0	0	0	0	0	0	0	0	0	0	0.88236	0	0	0	0	0	0	0	0	0	0	0	0	0	0	0	0	0	0	0
FBgn0032169	CG4709	protein_coding	2L	0	1.53897	0	0.857289	0.74485	0.797659	0	0.677411	1.23639	0.613776	0.716073	0	0	0	0	0	0.667438	0	0	0	0	0	0	0	0	0.971359	2.64708	1.0212	1.06399	1.67578	0	0	1.13899	1.34874	0	0	0	1.0578	0	0	1.55158	0.56191	0	0	0.704574	2.88845
FBgn0263647	CG43638	protein_coding	3L	0	0	0	0	0	0	0	0	0	0	0	0	0	0	0	0	0	0	0	0	0	0	0	0	0	1.94272	0	2.04239	0	0	0	0	0	0	0	0	0	0	0	0	0	0	0	0	0	0.577689
FBgn0035642	CG18586	protein_coding	3L	0	0	0	0	0	0	0	0	0	0	0	0	0	0	0	0	0	0	0	0	0	0	0	0	1.39386	0	0	0	1.06399	0	0	0	0.569496	0	0	1.30073	1.6534	0	0	0	0	0	0	0	0	0
FBgn0014032	Sptr	protein_coding	X	1.0644	0	1.44558	4.28645	0	0.39883	0	0	0	0	0	0	0	0	0	0	3.33719	8.08887	8.02173	2.77906	2.66446	1.27584	2.12926	1.67718	0	0	0	0	0	0	0	0	0	0	0	1.30073	0	2.11561	3.19837	10.762	0	0	0	0	0	0
FBgn0030716	CG9170	protein_coding	X	0	0	0	1.71458	0.74485	3.19064	3.13616	2.70964	7.41834	3.68265	5.01251	5.66985	0	1.21752	0	0	2.00231	2.42666	3.43788	2.77906	0	0	0	3.35436	1.39386	2.91408	2.64708	1.0212	1.06399	1.67578	5.83118	2.83338	1.13899	0.674369	0	1.30073	0	0	0	0	1.55158	1.68573	0	1.37233	2.11372	1.15538
FBgn0028663	VhaM9.7-b	protein_coding	3L	47.8979	50.786	43.3674	55.7238	26.0697	19.9415	30.5775	18.2901	27.8188	23.3235	29.359	26.4593	20.5012	25.5679	36.4201	37.2837	61.4043	69.5643	63.0279	63.9183	35.5261	42.1027	25.5511	20.1262	26.4833	41.7684	23.8237	25.5299	35.1117	30.1641	32.6546	26.4449	25.0578	28.9979	21.5315	35.1196	31.4146	28.5607	31.9837	51.1195	32.5832	30.9051	42.2518	26.0742	31.0013	21.3745
FBti0019436		transposable_element	3R	0	0	0	0	0	0	0	0	0	0	0	0	0	0	0	0	0	0	0	0	0	0	0	0	0	0	0	1.0212	0	0	0	0	0	0	0	0	0	0	0	0	0	0	0	0	0.704574	0
FBgn0027574	CG5815	protein_coding	3R	2.12879	6.15588	1.44558	2.57187	4.4691	4.38712	1.56808	6.0967	5.56376	4.91021	3.58036	2.83492	1.07901	3.65256	0	7.84919	6.00694	7.27999	12.6056	5.55812	2.66446	1.27584	8.51703	0	1.39386	4.85679	7.05888	4.08479	4.25596	8.37891	6.99742	4.72231	5.69496	6.74369	2.26648	0	6.61359	5.28902	9.5951	2.6905	7.75791	2.80955	2.41439	10.9786	3.52287	5.1992
FBgn0000546	EcR	protein_coding	2R	74.5078	33.8573	104.082	166.314	83.4232	82.1589	60.371	62.9992	18.5459	19.027	22.1983	15.1196	16.1852	25.5679	26.9192	21.5853	4.00463	3.23555	0	1.38953	69.2759	142.894	140.531	127.466	96.176	73.8233	52.9416	78.6322	18.0878	21.7852	33.8209	22.6671	42.1427	33.0441	39.6633	42.9239	4.96019	6.34683	0	2.6905	7.75791	118.001	83.2964	10.9786	57.0705	54.8805
FBgn0045852	ham	protein_coding	2L	0	0	0	0	0	0	0.784039	0.677411	0	0	0	0	0	0	0	0	0.667438	0	0	0	0	0	0	0	0	2.91408	1.76472	2.04239	0	0	1.16624	0	0	0	2.26648	0	0	0	0	0	0.775791	0.56191	0	0	0	1.15538
FBgn0002930	nec	protein_coding	2R	0	3.07794	4.33674	4.28645	8.19335	5.58361	3.9202	8.12893	0.618195	2.4551	0.716073	0.944975	39.9234	21.9153	26.9192	72.605	86.0995	145.6	115.742	144.511	0	1.27584	0	0	1.39386	2.91408	0.88236	2.04239	1.06399	0	0	2.83338	25.6273	18.8823	18.1318	19.5109	21.4942	43.37	49.5747	161.43	0.775791	1.68573	1.20719	0	9.86404	7.50996
FBgn0260746	Ect3	protein_coding	3R	0	0	0	0.857289	1.4897	2.79181	7.05635	0.677411	0.618195	0.613776	0.716073	0.944975	1.07901	1.21752	1.58348	0	6.00694	1.61777	3.43788	6.94764	0	0	0	0	16.7263	9.71359	10.5883	6.12718	2.12798	5.02735	3.49871	0.944461	0	4.72059	5.66619	5.2029	1.6534	4.23122	3.19837	0	0.775791	0	2.41439	1.37233	4.93202	2.31076
FBgn0037930	CG14715	protein_coding	3R	1.0644	0	4.33674	2.57187	5.9588	4.78595	8.62443	11.516	4.94556	4.91021	7.16073	4.72487	11.8691	8.52263	12.6679	19.623	14.0162	6.4711	22.9192	25.0115	1.7763	2.55168	6.38777	0	18.1201	14.5704	15.8825	6.12718	12.7679	6.70313	16.3273	11.3335	10.2509	10.7899	7.93267	6.50363	8.26699	8.46244	3.19837	24.2145	6.20633	2.80955	1.20719	2.74466	11.9778	9.82072
FBgn0053552	CG33552	protein_coding	2L	0	0	0	0	0	0	0	0	0	0	0	0	0	0	0	0	0	0	0	0	0	0	0	0	0	0	0.88236	0	0	0	0	0	0	0	0	0	0	0	0	0	0	0	0	0	0	0.577689
FBgn0038709	CG15025	protein_coding	3R	0	0	0	0	0	0	0	0	0	0	0.716073	0	0	0	0	0	0	0	0	0	0	0	0	0	0	0.971359	0	0	0	0	0	0	0	0	0	0	0	0	0	0	0	0	0	0	0	0
FBti0020435		transposable_element	4	0	0	0	0	0	0	0	0	0	0	0	0	0	0	0	0	0	0	0	0	0	0	0	0	0	0	0	0	0	1.67578	0	0	0	0	0	0	0	0	0	0	0	0	0	0	0	0
FBti0063940		transposable_element	3L	0	0	0	0	0	0	0	1.35482	0	0	0	0	0	0	0	0	0	0	0	0	0	0	0	0	0	0	0	0	0	0	0	0	0	0	0	0	0	0	0	0	0	0	0	0	0	0
FBgn0027095	Manf	protein_coding	3R	10.644	10.7728	13.0102	10.2875	17.8764	14.7567	15.6808	22.3546	17.3095	14.7306	22.1983	19.8445	35.6073	15.8277	22.1688	45.1329	6.00694	4.04444	5.72981	4.16859	2.66446	10.2067	10.6463	3.35436	13.9386	10.6849	7.94124	5.10599	9.57591	15.082	18.6598	6.61123	18.2239	12.813	9.06591	20.8116	0	2.11561	0	8.07151	10.0853	6.18101	15.6935	5.48931	11.9778	12.1315
FBgn0031231	mRpL10	protein_coding	2L	1.0644	1.53897	2.89116	2.57187	4.4691	1.59532	5.48828	3.38705	4.32737	1.84133	4.29644	3.7799	9.71109	9.74015	9.5009	7.84919	2.00231	0.808887	2.29192	1.38953	0	0	4.25852	1.67718	1.39386	2.91408	0.88236	1.0212	5.31995	3.35157	2.33247	1.88892	5.12546	5.39495	4.53295	10.4058	0	3.17341	0	0	0.775791	1.12382	1.20719	1.37233	4.22744	0.577689
RR41993_transposable_element		transposable_element	3L	0	0	0	0	0	0	0	0	0	0	0	0	0	0	0	0	0	0	0	0	0	0	0	0	1.39386	0	0	0	0	0	0	0.944461	0.569496	0	0	0	0	0	0	0	0	0	0	0	0	0.577689
FBgn0028645	beat-Ib	protein_coding	2L	0	0	0	0	0	0	0	0	0	0	0	0	0	0	0	0	0	0	0	0	0	0	0	0	0	0	0	0	0	0	0	0	0	0	0	0	0	0	0	0	0	0	0	0	0	0
FBgn0032363	Dlg5	protein_coding	2L	1.0644	0	1.44558	6.85831	2.23455	3.58947	3.13616	1.35482	1.85459	1.22755	2.86429	0.944975	2.15802	2.43504	0	0	2.66975	4.04444	1.14596	2.77906	0.888152	0	0	1.67718	0	0	0.88236	0	2.12798	0	3.49871	0	2.27798	0.674369	1.13324	1.30073	0	1.0578	4.79755	2.6905	2.32737	0.56191	2.41439	4.11698	0	2.31076
FBgn0031875	CG3430	protein_coding	2L	0	0	0	0	2.23455	0	0.784039	0	1.85459	0	0.716073	0	0	0	1.58348	0	1.33488	0	0	1.38953	0	0	0	0	1.39386	2.91408	2.64708	1.0212	0	0	2.33247	1.88892	0	0	2.26648	0	0	0	0	0	0	0	0	0	0	0.577689
FBgn0036207	CG10907	protein_coding	3L	3.19319	3.07794	2.89116	1.71458	5.9588	1.19649	7.84039	4.06446	2.47278	2.4551	3.58036	1.88995	3.23703	2.43504	1.58348	1.9623	2.66975	6.4711	4.58384	4.16859	7.10522	6.3792	4.25852	6.70872	12.5447	3.88544	7.05888	8.16958	2.12798	6.70313	4.66495	2.83338	1.13899	2.69748	6.79943	2.60145	16.534	9.52024	0	0	3.87895	7.30483	2.41439	4.11698	7.75031	8.66534
FBgn0052438	SMC5	protein_coding	3L	0	0	0	0	1.4897	1.19649	0.784039	1.35482	0.618195	0.613776	0.716073	0	0	1.21752	0	1.9623	0	0	0	0	0	0	0	0	2.78771	2.91408	0.88236	3.06359	0	1.67578	1.16624	0	0	0.674369	0	0	0	0	0	0	0.775791	0	0	0	2.11372	2.31076
FBgn0052189	CG32189	protein_coding	3L	0	0	0	0	0	0	0	0	0	0	0	0	0	0	0	0	0	0	0	0	0	0	0	0	0	0	0	0	0	0	0	0	0	0	0	0	0	0	0	0	0	0	0	0	0	0
FBgn0030385	Ir11a	protein_coding	X	0	0	0	0	0	0	0	0	0	0	0	0	0	0	0	0	0	0	0	0	0	0	0	0	0	0	0	0	0	0	0	0	0	0	0	0	0	0	0	0	0	0	0	0	0	0
FBgn0036428	Gbs-70E	protein_coding	3L	36.1895	7.69484	36.1395	36.0061	5.21395	5.58361	7.84039	1.35482	2.47278	0.613776	0.716073	1.88995	29.1333	14.6102	19.0018	27.4722	60.0694	54.1955	40.1086	45.8544	26.6446	31.896	53.2314	78.8274	1.39386	3.88544	5.29416	2.04239	9.57591	0	3.49871	4.72231	27.9053	26.3004	16.9986	19.5109	8.26699	20.0983	11.1943	64.5721	10.0853	112.944	38.6302	15.0956	17.6144	5.77689
FBgn0034631	TAF1C-like	protein_coding	2R	0	0	0	1.71458	2.9794	0.797659	0.784039	2.70964	4.32737	3.06888	2.14822	2.83492	0	2.43504	1.58348	0	2.66975	0.808887	0	2.77906	0.888152	0	0	0	0	0	0	0	0	1.67578	1.16624	2.83338	2.27798	1.34874	1.13324	0	1.6534	0	0	0	0	1.12382	1.20719	0	3.52287	0.577689
FBgn0265810	asRNA:CR44599	ncRNA	2L	0	0	0	0	0	0	0	0	0	0	0	0	0	0	0	0	0	0	0	0	0	0	0	0	0	0	0	0	0	0	0	0	0	0	0	0	0	0	0	0	0	0	0	0	0	0
FBgn0051450	mRpS18A	protein_coding	3R	1.0644	1.53897	1.44558	2.57187	4.4691	2.39298	6.27232	3.38705	12.9821	9.20664	13.6054	12.2847	14.0271	13.3927	20.5853	33.3591	2.66975	0.808887	2.29192	5.55812	2.66446	0	0	0	2.78771	7.77087	9.70596	9.19078	15.9599	11.7305	15.1611	12.278	13.0984	9.44117	6.79943	5.2029	0	3.17341	1.59918	10.762	0	0.56191	0	2.74466	9.15946	9.82072
FBgn0028979	tio	protein_coding	2L	4.25759	0	4.33674	1.71458	0	1.59532	3.9202	2.03223	30.9098	23.3235	27.2108	43.4688	14.0271	18.2628	20.5853	15.6984	14.6836	16.9866	41.2546	12.5058	0	5.10336	10.6463	6.70872	2.78771	1.94272	1.76472	3.06359	13.8319	11.7305	17.4936	12.278	11.3899	6.06932	4.53295	9.10508	18.1874	8.46244	22.3886	24.2145	0.775791	2.80955	1.20719	1.37233	4.22744	2.88845
FBti0019221		transposable_element	2L	0	0	0	0	0	0	0	0	0	0	0	0	0	0	0	0	0	0	0	0	0	0	0	0	0	0	0	0	0	0	0	0	0	0	0	0	0	0	0	0	0	0	0	0	0	0
FBgn0034392	MFS15	protein_coding	2R	3.19319	4.61691	1.44558	4.28645	0	4.38712	5.48828	5.41929	1.23639	0.613776	0.716073	0.944975	1.07901	0	1.58348	0	5.3395	6.4711	8.02173	5.55812	5.32891	0	2.12926	3.35436	5.57542	5.82815	1.76472	5.10599	2.12798	1.67578	2.33247	0	2.27798	2.69748	4.53295	2.60145	9.92039	14.8093	4.79755	2.6905	0.775791	3.93337	4.82878	1.37233	3.52287	4.62152
FBgn0032030	Wdr82	protein_coding	2L	1.0644	0	0	1.71458	1.4897	1.99415	1.56808	1.35482	0.618195	1.22755	0.716073	0.944975	0	2.43504	1.58348	0	0.667438	0.808887	1.14596	2.77906	0	2.55168	2.12926	1.67718	0	0.971359	0.88236	3.06359	3.19197	3.35157	0	2.83338	0	1.34874	0	1.30073	3.3068	1.0578	0	0	0	0	0	2.74466	1.40915	2.88845
FBgn0052570	TwdlY	protein_coding	X	1.0644	0	0	0	0	0	0	0	0.618195	0	0	0	0	0	0	0	0	0	0	0	0	0	0	0	0	0	0	0	1.06399	0	0	0	0	0	0	0	0	1.0578	0	0	0	0	0	0	0	0
FBgn0038774	CG5023	protein_coding	3R	1045.24	447.84	579.678	534.948	0.74485	0	0	0	1.85459	3.68265	27.9268	53.8636	182.353	198.455	226.438	145.21	1015.17	1358.12	1862.19	1268.64	47.9602	183.721	59.6192	142.56	2.78771	0	0	0	13.8319	8.37891	15.1611	12.278	38.7257	43.1596	37.3969	68.9385	1326.03	1058.86	1730.32	1065.44	12.4127	59.5625	178.665	21.9572	2.11372	1.15538
FBgn0050291	CG30291	protein_coding	2R	2.12879	4.61691	2.89116	4.28645	2.9794	3.58947	4.70424	2.70964	3.70917	6.75153	7.16073	5.66985	4.31604	10.9577	7.91742	1.9623	2.66975	3.23555	3.43788	4.16859	5.32891	10.2067	2.12926	3.35436	11.1508	5.82815	4.4118	4.08479	5.31995	5.02735	2.33247	3.77785	5.12546	8.7668	4.53295	5.2029	8.26699	10.578	1.59918	8.07151	2.32737	5.05719	4.82878	1.37233	8.45489	6.93227
FBgn0025638	Roc1a	protein_coding	X	46.8335	44.6301	46.2586	36.8634	28.3043	31.1087	36.8499	30.4835	22.8732	24.551	20.7661	25.5143	17.2642	34.0905	23.7523	25.5099	56.0648	46.9155	72.1956	69.4764	49.7365	42.1027	59.6192	33.5436	82.2375	67.0238	62.6476	73.5262	38.3037	30.1641	37.3196	43.4452	29.6138	39.1134	36.2636	22.1123	66.1359	75.1041	57.5706	48.429	64.3906	64.0578	76.0532	48.0315	89.4809	83.1873
FBgn0037794	CG6254	protein_coding	3R	2.12879	4.61691	0	0.857289	2.23455	5.58361	0.784039	4.06446	0.618195	3.06888	0.716073	0	1.07901	0	0	0	1.33488	2.42666	2.29192	2.77906	0.888152	1.27584	0	1.67718	4.18157	1.94272	2.64708	10.212	0	0	0	0.944461	0	0	0	1.30073	0	0	1.59918	0	2.32737	1.68573	0	0	5.63659	5.1992
FBgn0039229	Saf-B	protein_coding	3R	24.4811	18.4676	20.2381	19.7176	63.3122	43.4724	42.3381	47.4187	89.0201	79.1771	65.1626	98.2774	70.1357	63.311	55.4219	60.8313	12.6813	8.08887	25.2111	6.94764	15.0986	26.7926	29.8096	15.0946	27.8771	30.1121	16.7648	18.3816	52.1355	43.5703	55.9794	51.9454	31.3223	41.1365	26.0645	29.9167	4.96019	21.1561	12.7935	21.524	11.6369	11.8001	14.4863	12.351	26.0692	25.996
FBgn0065064	snoRNA:Psi28S-291	snoRNA	3R	0	0	0	0	0	0	0.784039	0	0	0	0	0	0	0	0	0	0	0	0	0	0	0	0	0	0	0	0	0	0	0	0	0	0	0	0	0	0	0	0	0	0	0	0	0	0	0
FBgn0017482	T3dh	protein_coding	2R	0	0	0	0	0	0	0	0	0	0	0	0.944975	0	0	0	0	2.00231	0.808887	1.14596	0	0	0	0	0	0	0	0	0	0	0	0	0	0.569496	0	1.13324	1.30073	1.6534	0	0	0	0	1.12382	0	0	0	0.577689
FBgn0031675	CG9121	protein_coding	2L	0	0	0	0	0	0	0	0	0	0	0	0	0	0	0	0	0	0	0	0	0.888152	0	0	0	0	0	0	0	0	0	0	0	0	0	0	0	0	0	0	0	0	0	0	2.74466	0	0.577689
FBgn0032348	CG4751	protein_coding	2L	1.0644	3.07794	1.44558	4.28645	7.4485	9.17308	10.1925	2.03223	6.18195	1.84133	2.14822	1.88995	3.23703	3.65256	0	3.9246	2.00231	0.808887	0	4.16859	0.888152	6.3792	0	3.35436	1.39386	4.85679	6.17652	6.12718	3.19197	3.35157	2.33247	4.72231	1.13899	4.04622	1.13324	1.30073	6.61359	1.0578	6.39673	0	3.87895	1.68573	4.82878	0	3.52287	8.66534
FBgn0032973	CG6675	protein_coding	2L	0	0	0	0	0	0	0	0	0	0	0	0	0	0	0	0	0	0	0	0	0	0	0	0	0	0	0	0	0	0	0	0	0	0	0	0	0	3.17341	1.59918	0	0	0	0	0	0	0
FBgn0013772	Cyp6a8	protein_coding	2R	0	0	0	0	0	0	0	0	0	0	0	0	0	0	0	0	0	0	0	0	0	0	0	0	0	0	0	0	0	0	0	0	0	0	0	0	0	0	0	5.381	0	0	0	0	0	0.577689
FBgn0015286	Rala	protein_coding	X	7.45078	40.0132	28.9116	24.0041	23.8352	19.5426	32.1456	31.8383	7.41834	7.97908	5.01251	8.50477	1.07901	4.87007	1.58348	5.8869	30.0347	21.84	16.0435	36.1277	17.763	12.7584	23.4218	10.0631	15.3324	24.284	23.8237	26.5511	11.7039	25.1367	22.1585	18.8892	2.84748	4.04622	3.39972	9.10508	29.7612	32.7919	14.3927	10.762	26.3769	14.6097	10.8647	26.0742	23.2509	16.753
FBgn0051643	CG31643	protein_coding	2L	0	0	0	0	0	0	0	0.677411	0	0	0	0	0	0	0	0	1.33488	0	1.14596	0	0	1.27584	0	1.67718	1.39386	0	1.76472	0	4.25596	0	0	1.88892	0	0	0	0	0	0	0	0	0	0	1.20719	1.37233	0	0
FBgn0035142	Hipk	protein_coding	3L	36.1895	323.183	53.4865	75.4414	105.024	100.505	85.4603	96.8697	72.3289	75.4944	63.0144	57.6435	43.1604	60.8759	72.8402	52.9821	393.788	159.351	97.4067	187.586	264.669	70.1712	78.7825	68.7644	69.6928	73.8233	74.1183	63.3142	65.9674	83.7891	61.8105	60.4455	64.9225	55.2983	77.0602	59.8334	251.316	340.613	156.72	139.906	570.982	75.8579	61.5669	620.292	83.1397	86.0757
FBgn0022724	Taf8	protein_coding	X	1.0644	3.07794	1.44558	2.57187	1.4897	1.59532	0.784039	5.41929	4.94556	3.06888	5.72858	1.88995	2.15802	1.21752	0	3.9246	5.3395	6.4711	0	4.16859	0.888152	1.27584	0	0	0	0	1.76472	0	0	0	2.33247	1.88892	2.27798	0.674369	1.13324	1.30073	3.3068	2.11561	3.19837	2.6905	0.775791	0	0	0	0	1.73307
FBgn0038737	CG11447	protein_coding	3R	0	0	0	0	0.74485	0	0	0	1.23639	0	0	0.944975	1.07901	1.21752	1.58348	0	1.33488	0	1.14596	0	3.55261	1.27584	2.12926	5.03154	1.39386	0.971359	2.64708	4.08479	2.12798	1.67578	0	0	1.13899	4.72059	1.13324	3.90218	1.6534	0	0	0	3.87895	2.24764	0	1.37233	2.11372	1.15538
FBti0061294		transposable_element	2R	0	0	0	1.71458	0.74485	0.39883	0	0	0	0	0	0	0	0	0	0	0	0	0	0	0	0	0	0	0	0	0	0	0	0	0	0	0	0	0	0	0	0	0	0	0	0	0	1.37233	0.704574	0
FBgn0262787	CG43168	protein_coding	3L	0	0	0	0	0	0	0	0	0	0	0	0.944975	0	0	0	0	0	0	0	0	0	0	0	0	0	0	0	0	0	0	0	0	0	0	0	0	0	0	0	0	0	0	0	0	0	0
FBgn0036004	Jarid2	protein_coding	3L	21.2879	10.7728	15.9014	20.5749	20.1109	21.9356	11.7606	16.2579	16.6913	14.1168	11.4572	9.44975	12.9481	12.1752	11.0844	9.81149	26.6975	25.8844	12.6056	31.9592	20.4275	33.1719	12.7755	25.1577	13.9386	8.74223	21.1766	15.318	20.2158	8.37891	9.32989	15.1114	9.68142	10.7899	7.93267	7.80435	36.3748	34.9075	17.591	26.905	17.0674	20.2288	14.4863	28.8189	11.2732	11.5538
FBti0019526		transposable_element	X	0	0	0	0	0	0.39883	0.784039	0	0	0	0	0	0	0	0	0	0	0	0	0	0	0	0	0	1.39386	0	0	0	0	0	0	0	0	0	0	0	0	0	0	0	0	0	0	0	0	0
FBti0063180		transposable_element	2R	0	0	0	0	0	0	0	0	0	0	0	0	0	0	0	0	0	0	0	0	0	0	0	0	0	0	0	0	0	0	0	0	0	0	0	0	0	0	0	0	0	0	0	0	0	0
FBti0019053		transposable_element	X	0	0	0	0	0	0	0	0	0	0	0	0	0	0	0	0	0	0	0	0	0	0	0	0	0	0	0	1.0212	0	0	0	0	0	0	0	0	0	0	0	0	0	0	0	0	0	0
FBgn0025454	Cyp6g1	protein_coding	2R	0	0	0	0	0	0	0	0	0.618195	0	0	0	2.15802	0	0	1.9623	5.3395	4.85332	9.16769	2.77906	0	0	0	0	0	0	0	0	0	0	0	0.944461	0	0.674369	0	0	1.6534	3.17341	14.3927	0	0	0	0	0	0	0
FBgn0034000	CG11808	protein_coding	2R	0	0	0	0.857289	1.4897	0.797659	0.784039	0.677411	1.23639	0.613776	2.86429	1.88995	0	0	0	0	0.667438	0.808887	0	0	0	0	0	0	1.39386	0	0	1.0212	1.06399	0	1.16624	0.944461	0	0	1.13324	0	0	0	0	0	0.775791	0	1.20719	2.74466	3.52287	3.46614
FBgn0023529	CG2918	protein_coding	X	4.25759	21.5456	13.0102	18.0031	32.7734	41.0794	41.5541	33.8705	24.1096	27.6199	27.2108	17.9545	15.1061	8.52263	17.4183	41.2083	6.00694	8.08887	8.02173	8.33717	39.0787	14.0342	25.5511	8.3859	36.2402	33.0262	30.8826	23.4875	22.3438	20.1094	32.6546	28.3338	13.0984	16.8592	12.4656	7.80435	3.3068	3.17341	0	24.2145	48.8748	21.3526	14.4863	37.0529	47.911	47.9482
FBgn0265688	lncRNA:CR44495	ncRNA	2L	0	0	0	0	0	0	0	0	0	0	0	0	0	0	0	0	0	0	0	0	0	0	0	0	0	0	0	0	0	0	0	0	0	0	0	0	0	0	0	0	0	0	0	0	0	0
FBti0019411		transposable_element	3R	0	0	0	0	0	0	0	0	0	0	0	0	0	0	0	0	0	0	0	0	0	0	0	0	0	0	0	1.0212	0	0	0	0	0	0.674369	0	0	0	0	0	0	0	0	0	0	0	0
FBgn0036031	CG6761	protein_coding	3L	0	0	0	0	0	0	0	0	0	0	0	0	0	0	0	0	0	0	0	0	0	0	0	0	2.78771	0.971359	0	1.0212	0	0	0	0	0	0	0	0	0	0	0	0	0	0	0	0	0	0
FBti0020393		transposable_element	3R	0	0	0	0	0	0.39883	0	0	0	0	0	0	0	0	0	0	0	0	0	0	0	0	2.12926	0	0	0	0	0	0	0	0	0	0	0	0	1.30073	0	0	0	0	0	0.56191	0	0	0	0
FBgn0266222	lncRNA:CR44917	ncRNA	2L	0	0	0	0	0	0.39883	0	0	0	0	0	0	0	0	0	0	0	0	0	1.38953	0.888152	0	0	0	0	0	0	0	0	0	0	0	0	0	0	0	0	0	0	0	0	0	0	0	0	0
FBgn0033875	CG6357	protein_coding	2R	0	0	0	0	25.3249	19.1438	15.6808	23.032	0	0.613776	1.43215	0.944975	0	0	0	0	1.33488	2.42666	2.29192	13.8953	0	0	0	0	12.5447	15.5417	16.7648	5.10599	1.06399	0	4.66495	1.88892	1.13899	2.02311	2.26648	1.30073	11.5738	2.11561	1.59918	0	1.55158	0	1.20719	1.37233	22.5464	13.2869
FBgn0039291	CG13663	protein_coding	3R	1.0644	0	4.33674	0.857289	2.23455	1.59532	0.784039	0.677411	0	0.613776	1.43215	0	0	0	0	0	0.667438	0	0	1.38953	1.7763	2.55168	4.25852	0	2.78771	2.91408	0.88236	0	0	1.67578	0	0.944461	1.13899	2.69748	0	0	0	2.11561	1.59918	0	0	0	0	1.37233	1.40915	1.15538
FBgn0032084	CG13101	protein_coding	2L	0	0	1.44558	0	0	0	0	0	0	0	0	0	0	0	1.58348	0	0	1.61777	0	0	0	0	0	0	0	0	0	0	0	0	0	0	0	0.674369	0	0	0	1.0578	3.19837	0	0	0.56191	0	0	0	0
FBgn0037547	CG7910	protein_coding	3R	0	0	0	0	0	0	0	0	0.618195	0	0.716073	0.944975	0	0	0	0	2.00231	3.23555	0	0	0	0	0	0	0	0	0	0	0	0	0	0	0	0	0	0	0	2.11561	0	2.6905	0	0.56191	0	0	0	0
FBgn0038966	pinta	protein_coding	3R	2.12879	27.7014	8.67348	9.43018	11.1727	9.97074	18.8169	16.9353	3.70917	1.84133	4.29644	0	11.8691	13.3927	11.0844	13.7361	36.0417	27.5022	24.0652	20.8429	5.32891	1.27584	8.51703	3.35436	25.0894	18.4558	17.6472	18.3816	0	0	0	0.944461	1.70849	6.06932	4.53295	1.30073	21.4942	16.9249	11.1943	40.3575	14.74	5.6191	3.62158	4.11698	23.2509	20.2191
FBgn0036255	Atg12	protein_coding	3L	1.0644	0	1.44558	0	0.74485	0.797659	0.784039	0	0.618195	0	0	0	1.07901	0	0	0	1.33488	0	1.14596	1.38953	1.7763	0	0	0	0	0.971359	0.88236	0	2.12798	0	1.16624	0	0	0.674369	0	0	1.6534	0	1.59918	0	0.775791	1.12382	0	2.74466	1.40915	0.577689
FBgn0264815	Pde1c	protein_coding	2L	0	10.7728	1.44558	0.857289	0	0.39883	0	0.677411	3.70917	1.84133	4.29644	0.944975	5.39505	3.65256	3.16697	7.84919	18.0208	14.56	33.2329	15.2848	5.32891	6.3792	0	5.03154	0	1.94272	4.4118	1.0212	2.12798	1.67578	1.16624	0	1.70849	10.1155	1.13324	1.30073	31.4146	39.1388	19.1902	26.905	1.55158	1.68573	0	1.37233	0	0
FBgn0037690	Task7	protein_coding	3R	0	0	0	0	0	0	0	0	0	0	0	0	0	0	0	0	0	0	0	0	0	0	0	0	0	0	0	0	0	0	0	0	0	0	0	0	0	0	0	0	0	0	0	0	0	0
FBgn0262572	CG43112	protein_coding	2R	0	0	0	0.857289	0	0	0	0	0	0	0	0	0	0	0	0	0	0	0	0	0	0	0	0	0	0	0	0	0	0	0	0	0	0	0	0	0	0	0	0	0	0	0	0	0	0
FBgn0259145	CG42260	protein_coding	2R	0	0	0	0	0	0	0.784039	0	0	0	0	0	0	0	0	0	0	0	0	0	0	0	0	0	0	0	0	0	0	0	1.16624	0	0	1.34874	0	0	0	0	0	0	0	0	0	0	0	0.577689
FBgn0034540	Lrt	protein_coding	2R	4.25759	1.53897	5.78232	5.14373	8.93819	6.7801	10.9766	4.06446	0	1.22755	1.43215	0	0	1.21752	6.33393	0	5.3395	3.23555	5.72981	2.77906	1.7763	7.65504	8.51703	6.70872	2.78771	5.82815	1.76472	0	0	0	1.16624	0	1.13899	0.674369	1.13324	1.30073	13.2272	6.34683	9.5951	13.4525	3.87895	4.49528	2.41439	1.37233	2.8183	2.88845
FBgn0033191	CG1598	protein_coding	2R	11.7084	13.8507	21.6837	12.8593	15.6418	9.17308	10.9766	12.1934	12.9821	13.5031	11.4572	11.3397	24.8172	21.9153	17.4183	13.7361	61.4043	42.0621	36.6708	38.9068	22.2038	17.8618	14.9048	13.4174	18.1201	17.4845	11.4707	14.2968	5.31995	13.4063	11.6624	7.55569	15.3764	25.626	27.1977	16.9094	33.068	46.5434	27.1861	24.2145	20.9464	17.4192	27.7655	20.5849	10.5686	14.4422
FBgn0033555	RpS15Ab	protein_coding	2R	10.644	1.53897	5.78232	4.28645	5.9588	3.58947	2.35212	3.38705	11.1275	12.2755	12.1732	17.0095	7.55307	7.30511	9.5009	5.8869	3.33719	4.04444	0	11.1162	0.888152	10.2067	4.25852	6.70872	1.39386	0.971359	2.64708	4.08479	15.9599	6.70313	4.66495	9.44461	8.54243	10.7899	9.06591	11.7065	3.3068	3.17341	1.59918	0	2.32737	3.37146	9.65755	1.37233	2.8183	8.08765
FBti0059954		transposable_element	3L	0	0	0	0	0.74485	0	0	0	0	0	0	0	0	0	0	0	0	0	0	0	0	0	0	0	0	0	0	0	0	0	0	0	0.569496	0	0	0	0	0	0	0	0	0	0	0	0	0
FBti0019321		transposable_element	3R	0	0	0	0	0	0.39883	0.784039	0	0	0	0	0	0	0	0	0	0.667438	0.808887	1.14596	0	1.7763	0	0	0	1.39386	0.971359	0.88236	0	0	1.67578	1.16624	1.88892	0.569496	0.674369	0	0	0	0	0	0	0	0	0	0	0.704574	1.15538
FBgn0266778	lncRNA:CR45243	ncRNA	3L	0	0	0	0	0	0	0	0	0	0	0	0	0	0	0	0	0	0	0	0	0	0	0	0	0	0	0	0	0	0	0	0	0	0	0	0	0	0	0	0	0	0	0	0	0	0
FBgn0036266	Tsen54	protein_coding	3L	0	0	0	0.857289	0.74485	0.797659	0.784039	0	1.23639	4.91021	0.716073	3.7799	1.07901	1.21752	0	0	0	0	0	0	0	0	0	0	0	2.91408	0	0	3.19197	0	1.16624	8.50015	0.569496	0.674369	0	1.30073	0	1.0578	1.59918	0	0	0.56191	0	0	3.52287	4.04383
FBti0060253		transposable_element	2R	0	0	0	0	0	0.39883	0	0	0.618195	0	0	0	0	0	0	0	0	0	0	0	0	0	0	0	0	0	0	0	0	0	1.16624	0	0	0	0	0	0	0	0	0	0	0	0	0	0	0
FBgn0025630	Rtca	protein_coding	X	0	1.53897	0	0	0.74485	0.797659	0	0	0	0	0	0	0	1.21752	3.16697	0	0	0	0	0	0	3.82752	0	1.67718	0	0	0	2.04239	1.06399	0	2.33247	1.88892	3.98647	3.37185	2.26648	6.50363	0	0	0	0	0.775791	0.56191	1.20719	1.37233	1.40915	1.15538
FBgn0035708	axed	protein_coding	3L	1.0644	0	2.89116	1.71458	0.74485	0.797659	0	0.677411	4.32737	4.29643	3.58036	2.83492	3.23703	2.43504	1.58348	7.84919	0.667438	0	0	0	5.32891	8.93088	2.12926	10.0631	1.39386	2.91408	5.29416	3.06359	12.7679	11.7305	8.16366	5.66677	18.7934	18.8823	14.7321	16.9094	9.92039	0	1.59918	0	0.775791	5.05719	1.20719	0	4.93202	1.73307
FBgn0259226	CG42326	protein_coding	2R	0	1.53897	0	0	0	0	0	0	0.618195	0	0	0	0	0	0	0	0	0	0	0	0	0	0	0	0	0	0	0	0	0	0	0	0	0	0	0	0	0	0	0	0	0	1.20719	4.11698	0	0
FBgn0023388	Dap160	protein_coding	2L	11.7084	6.15588	10.1191	12.002	9.68304	15.9532	10.1925	4.74187	9.89112	7.97908	10.025	14.1746	16.1852	7.30511	14.2514	11.7738	7.34182	12.1333	8.02173	8.33717	7.10522	10.2067	6.38777	6.70872	16.7263	10.6849	11.4707	11.2332	7.44793	10.0547	12.8286	9.44461	10.8204	8.09243	14.7321	5.2029	9.92039	9.52024	7.99592	16.143	7.75791	8.42866	9.65755	10.9786	4.93202	4.62152
FBgn0024806	DIP2	protein_coding	3L	2.12879	16.9287	5.78232	5.14373	41.7116	22.3345	22.7371	18.2901	4.32737	8.59286	3.58036	4.72487	2.15802	2.43504	1.58348	3.9246	21.358	15.3689	5.72981	12.5058	8.88152	1.27584	4.25852	5.03154	16.7263	27.1981	18.5296	20.4239	7.44793	5.02735	4.66495	3.77785	2.84748	2.69748	2.26648	5.2029	19.8408	17.9827	7.99592	8.07151	6.98212	1.12382	3.62158	2.74466	8.45489	10.3984
FBgn0050419	CG30419	protein_coding	2R	0	0	0	0	0	0	0	0	0	0	0	0	0	0	0	1.9623	0	0	1.14596	0	0	0	0	0	0	0	1.76472	0	0	0	0	0	0	0	0	0	0	0	3.19837	0	0	0	0	0	0	0
FBgn0029958	Pdp	protein_coding	X	28.7387	12.3118	14.4558	12.8593	5.21395	7.17893	7.05635	6.0967	8.65473	11.048	12.8893	5.66985	30.2123	17.0453	22.1688	15.6984	4.67207	6.4711	5.72981	4.16859	13.3223	19.1376	21.2926	31.8664	6.96928	8.74223	10.5883	10.212	17.0238	30.1641	15.1611	17.0003	26.7663	26.9748	26.0645	32.5181	4.96019	8.46244	11.1943	8.07151	5.43054	18.543	21.7295	16.4679	8.45489	9.24303
FBgn0003386	Shaw	protein_coding	2L	0	1.53897	1.44558	0	0	0	0.784039	0	0	0.613776	0	0	0	0	0	0	4.00463	3.23555	3.43788	1.38953	0	2.55168	0	0	0	0	0.88236	0	0	0	0	0.944461	0	0	0	0	4.96019	8.46244	1.59918	10.762	1.55158	2.24764	0	1.37233	1.40915	0
FBgn0039914	mav	protein_coding	4	30.8675	12.3118	10.1191	24.8614	23.8352	23.1321	18.8169	27.7738	32.7644	52.1709	49.409	49.1387	19.4222	28.0029	12.6679	11.7738	4.67207	5.66221	8.02173	6.94764	5.32891	7.65504	8.51703	20.1262	16.7263	14.5704	15.0001	19.4028	22.3438	30.1641	20.9923	19.8337	17.0849	12.1386	22.6648	20.8116	8.26699	7.40463	3.19837	5.381	10.8611	15.1716	24.1439	9.6063	14.7961	13.8645
FBgn0085482	CG34453	protein_coding	3L	0	0	0	0	0	0	0	0	0	0	0	0	0	0	0	0	0	0.808887	0	2.77906	0	0	0	0	0	0	0	0	0	0	0	0	0	0	0	0	0	0	0	0	0	0	0	0	0	0
FBgn0260442	rhea	protein_coding	3L	36.1895	32.3183	40.4762	30.0051	53.6292	47.4607	39.202	41.9995	21.0186	28.2337	24.3465	31.1842	28.0543	28.0029	23.7523	15.6984	8.67669	6.4711	9.16769	11.1162	27.5327	45.9303	17.0341	30.1892	32.0587	25.2553	15.0001	21.4451	17.0238	11.7305	16.3273	19.8337	45.5596	26.9748	29.4642	28.616	9.92039	7.40463	9.5951	8.07151	3.87895	18.543	14.4863	8.23397	31.0013	21.9522
FBti0061766		transposable_element	2R	0	0	0	0	0	0	0	0	0	0	0	0	0	1.21752	0	0	0	0	0	0	0	0	0	0	0	0	0	0	0	0	0	0	0	0	0	0	0	0	0	0	0.775791	0	0	0	0	0
FBti0062433		transposable_element	2R	0	0	0	0	0.74485	0.39883	0	0.677411	0.618195	1.22755	0	0	0	0	0	0	1.33488	0	0	0	0	0	0	0	0	0	0	0	0	0	0	0	0	0	0	0	0	0	0	0	0	0	0	0	0	0
FBgn0087011	CG41520	protein_coding	2R	0	0	0	0	2.9794	5.18478	1.56808	4.06446	0	0.613776	2.86429	0	1.07901	1.21752	3.16697	0	4.00463	2.42666	3.43788	1.38953	0	0	0	0	0	1.94272	2.64708	0	0	0	0	0	0.569496	0	0	0	0	1.0578	0	0	0	1.12382	0	0	2.11372	4.62152
FBgn0264952	lncRNA:CR44121	ncRNA	2L	0	0	0	0	0	0	0	0	0	0	0	0	0	0	0	0	0	0	0	0	0	0	0	0	0	0	0	0	0	0	0	0	0	0	0	0	0	0	0	0	0	0	0	0	0	0
FBgn0034093	CG15706	protein_coding	2R	17.0304	36.9353	28.9116	25.7187	8.19335	10.7684	6.27232	11.516	0.618195	1.22755	0	4.72487	2.15802	6.08759	1.58348	5.8869	26.6975	29.9288	17.1894	50.023	16.8749	7.65504	10.6463	23.4805	2.78771	11.6563	13.2354	17.3604	0	3.35157	4.66495	3.77785	6.83395	5.39495	0	3.90218	38.0281	25.3873	35.182	40.3575	27.9285	24.7241	16.9007	45.2868	8.45489	9.24303
FBgn0283503	Neurl4	protein_coding	3L	4.25759	4.61691	7.2279	2.57187	26.8146	16.7508	19.601	19.6449	11.7457	14.7306	13.6054	7.5598	6.47406	8.52263	6.33393	9.81149	4.67207	0	0	1.38953	5.32891	3.82752	0	5.03154	19.514	26.2267	21.1766	23.4875	10.6399	5.02735	11.6624	10.3891	1.13899	4.04622	7.93267	2.60145	3.3068	7.40463	1.59918	2.6905	7.75791	3.93337	1.20719	1.37233	18.3189	15.0199
FBgn0034937	fzr2	protein_coding	2R	0	0	0	0	0	0	0	0	0	0	0	0	0	0	0	0	0	0	0	0	0	0	0	0	0	0	0	0	0	0	0	0	0	0	0	0	0	0	0	0	0	0	0	0	0	0
FBgn0035934	TrpA1	protein_coding	3L	0	0	0	0	0	0	0	0	0	0	0	0	0	0	0	0	0	0	0	0	0	0	0	0	0	0	0	0	0	0	0	0	0	0	0	0	0	0	0	2.6905	0	0	0	0	0.704574	0
FBgn0264503	CG43902	protein_coding	X	0	0	0	0	0	0.39883	0.784039	0	0.618195	0.613776	0.716073	0	0	0	0	0	0	0	0	0	0	1.27584	0	0	1.39386	0	0	0	0	1.67578	0	0	0	0	1.13324	0	0	0	0	0	0	0	0	0	0.704574	0
FBgn0025809	Paf-AHalpha	protein_coding	X	7.45078	15.3897	10.1191	10.2875	56.6086	61.0209	45.4743	40.6446	46.9828	41.123	47.9769	57.6435	15.1061	13.3927	6.33393	11.7738	2.66975	1.61777	0	0	5.32891	5.10336	0	1.67718	69.6928	51.482	54.7063	42.8903	28.7277	48.5977	34.9871	43.4452	4.55596	11.4643	4.53295	5.2029	1.6534	3.17341	3.19837	8.07151	11.6369	8.99057	9.65755	17.8403	54.9568	51.4144
FBgn0035756	unc-13-4A	protein_coding	3L	3.19319	3.07794	2.89116	2.57187	7.4485	2.39298	3.9202	3.38705	4.94556	4.29643	4.29644	3.7799	3.23703	4.87007	0	0	1.33488	0	2.29192	0	5.32891	2.55168	2.12926	5.03154	1.39386	0.971359	3.52944	2.04239	11.7039	5.02735	6.99742	3.77785	3.98647	7.41806	10.1991	2.60145	4.96019	12.6937	1.59918	0	3.10316	3.93337	2.41439	5.48931	0	1.73307
FBgn0036990	mRpL15	protein_coding	3L	0	0	0	0	1.4897	3.58947	3.13616	4.74187	16.0731	15.3444	20.05	17.0095	15.1061	19.4803	28.5027	25.5099	2.66975	0.808887	5.72981	0	0	0	2.12926	0	0	2.91408	4.4118	0	11.7039	8.37891	12.8286	16.0558	11.9594	16.8592	12.4656	15.6087	0	1.0578	0	0	0	1.12382	0	1.37233	5.63659	2.88845
FBgn0038055	trus	protein_coding	3R	0	1.53897	0	1.71458	0.74485	0.39883	0	0	4.32737	2.4551	1.43215	0	0	1.21752	1.58348	5.8869	1.33488	0	0	0	0	0	0	0	1.39386	0.971359	1.76472	0	0	0	1.16624	1.88892	0.569496	0	0	0	0	0	0	0	1.55158	0.56191	1.20719	0	0	0.577689
FBgn0085211	RpS28-like	protein_coding	2L	0	0	0	0	0	0	0	0	0	0	0	0	0	0	0	0	0	0	0	0	0	0	0	0	0	0	0	0	0	0	0	0	0	0	0	0	0	0	0	0	0	0	0	0	0.704574	0
FBgn0031488	Ccdc85	protein_coding	2L	0	0	0	0.857289	2.9794	3.58947	1.56808	4.06446	0.618195	0	0.716073	0.944975	0	0	0	0	8.67669	1.61777	2.29192	1.38953	0.888152	1.27584	0	1.67718	1.39386	0	2.64708	2.04239	1.06399	0	2.33247	0.944461	0	1.34874	2.26648	0	1.6534	4.23122	0	5.381	0	1.12382	0	1.37233	1.40915	4.62152
FBgn0262679	CG43149	protein_coding	3L	0	0	0	0	0	0	0	0	0	0	0	0	0	0	0	0	0	0	0	0	0	0	0	0	0	0	0	0	0	0	0	0	0	0	0	0	0	0	0	0	0	0	0	0	0	0
FBgn0033979	Cyp6a19	protein_coding	2R	0	0	0	0	0	0	0	0	0	0	0	0	0	0	0	0	0	0	0	0	0	0	0	0	0	0	0	0	0	0	0	0	0.569496	0	0	0	0	0	0	0	0	0	0	0	0	0
FBgn0033097	Zip42C.2	protein_coding	2R	0	0	0	0	0	0	0	0	0	0.613776	0	0	0	0	0	0	0	0	0	0	0	0	0	0	0	0	0	0	0	0	0	0	0	0	0	0	0	0	0	0	0	0	0	0	0	0
FBgn0085397	Fili	protein_coding	2R	0	0	0	0	33.5182	38.2876	15.6808	23.032	25.346	25.1648	22.1983	29.2942	2.15802	1.21752	3.16697	0	2.66975	2.42666	3.43788	1.38953	0	0	0	0	25.0894	11.6563	28.2355	15.318	24.4718	21.7852	13.9948	18.8892	1.70849	0.674369	0	5.2029	1.6534	0	0	0	1.55158	0	2.41439	1.37233	16.9098	16.753
FBgn0263144	bin3	protein_coding	2R	6.38638	0	5.78232	7.7156	23.8352	29.5134	22.7371	20.9997	29.6734	37.4403	28.6429	40.6339	15.1061	15.8277	9.5009	11.7738	8.00926	5.66221	1.14596	6.94764	7.99337	21.6893	10.6463	13.4174	16.7263	20.3985	21.1766	24.5087	23.4078	36.8672	41.9845	43.4452	22.7798	18.8823	30.5974	18.2102	8.26699	13.7515	9.5951	24.2145	6.98212	15.1716	6.03597	8.23397	19.0235	23.6853
FBgn0036188	CG7339	protein_coding	3L	2.12879	1.53897	1.44558	1.71458	2.23455	1.59532	2.35212	0.677411	5.56376	7.36531	7.16073	4.72487	0	1.21752	0	3.9246	18.6883	21.84	29.795	19.4534	1.7763	2.55168	0	0	1.39386	3.88544	5.29416	1.0212	8.51192	6.70313	6.99742	11.3335	0	2.02311	2.26648	2.60145	52.9087	31.7341	62.3682	48.429	5.43054	1.12382	1.20719	1.37233	8.45489	5.1992
FBgn0036677	CG13023	protein_coding	3L	2.12879	0	1.44558	12.8593	7622.79	6635.73	5117.43	5206.58	20.4004	2.4551	11.4572	25.5143	0	1.21752	91.842	1.9623	0	0	1.14596	0	0	0	0	1.67718	1874.74	1137.46	1366.78	672.969	9.57591	8.37891	37.3196	14.1669	0.569496	0	7.93267	2.60145	0	1.0578	0	0	1.55158	0	2.41439	2.74466	3003.6	1551.1
FBgn0086347	Myo31DF	protein_coding	2L	23.4167	16.9287	28.9116	23.1468	40.2219	39.883	41.5541	53.5154	17.3095	19.6408	15.7536	18.8995	57.1875	60.8759	41.1706	68.6804	2.00231	0	0	1.38953	17.763	8.93088	23.4218	15.0946	93.3883	99.0786	105.883	125.607	14.8959	10.0547	16.3273	11.3335	78.5904	66.0882	63.4613	53.3297	9.92039	2.11561	0	5.381	9.30949	12.362	7.24316	19.2126	90.1855	57.1912
FBgn0086601	snoRNA:Psi28S-3327c	snoRNA	3L	0	0	0	0	0	0	0	0	0	0	0	0	0	0	0	0	0	0	0	0	0	0	0	0	0	0	0	0	0	0	0	0	0	0	0	0	0	0	0	0	0	0	0	0	0	0
FBgn0020300	geko	protein_coding	3L	1.0644	3.07794	0	3.42916	0	0	0	0	0	0	0	0	0	0	0	0	0.667438	0.808887	0	0	5.32891	3.82752	4.25852	1.67718	0	0	0	0	0	0	0	0	0	0.674369	0	2.60145	0	0	0	0	0.775791	1.12382	0	1.37233	0	0
FBgn0037082	CG5664	protein_coding	3L	0	0	0	0	4.4691	1.99415	0.784039	2.03223	3.70917	1.84133	1.43215	2.83492	0	1.21752	0	0	0	0.808887	0	0	0.888152	0	0	0	0	4.85679	3.52944	5.10599	2.12798	3.35157	8.16366	3.77785	1.13899	1.34874	1.13324	5.2029	0	0	0	0	0.775791	0	0	1.37233	1.40915	0
FBgn0053514	CG33514	protein_coding	3L	0	0	0	0	0	0	0	0	0	0	0	0	0	0	0	0	0	0	0	0	0	0	0	0	0	0	0	0	0	0	0	0	0	0	0	0	0	0	0	0	0	0	0	0	0	0
FBgn0261792	snRNP-U1-C	protein_coding	3R	2.12879	3.07794	1.44558	2.57187	3.72425	7.17893	4.70424	4.74187	3.70917	4.91021	7.16073	1.88995	6.47406	2.43504	4.75045	5.8869	2.66975	3.23555	1.14596	4.16859	2.66446	2.55168	0	0	5.57542	1.94272	6.17652	5.10599	5.31995	6.70313	6.99742	4.72231	4.55596	7.41806	5.66619	3.90218	4.96019	1.0578	1.59918	0	0.775791	1.68573	7.24316	0	4.93202	6.35458
FBgn0052452	CG32452	protein_coding	3L	1.0644	0	0	0	2.23455	2.79181	5.48828	1.35482	4.32737	4.29643	4.29644	2.83492	3.23703	3.65256	1.58348	1.9623	3.33719	0	0	1.38953	0	0	0	0	0	0	3.52944	4.08479	5.31995	1.67578	3.49871	1.88892	2.27798	0.674369	1.13324	0	1.6534	0	0	0	0	0	2.41439	1.37233	0.704574	1.73307
FBgn0051663	CG31663	protein_coding	2L	0	0	0	0	0	0	0	0	0	0	0	0	0	0	0	0	0	0	0	0	0	0	0	0	0	0	0	0	0	0	1.16624	0	0	0	0	0	1.6534	0	0	0	0	0	0	0	0	1.15538
FBgn0040606	CG6503	protein_coding	3R	0	0	0	0	0	0	0	0	0	0	0	0	1.07901	0	3.16697	0	12.6813	10.5155	25.2111	9.7267	0	0	0	0	0	0	0	0	0	0	0	0	7.40344	3.37185	3.39972	9.10508	0	6.34683	0	26.905	0	0	0	0	0	0
FBgn0037709	CG8199	protein_coding	3R	4.25759	6.15588	0	0	3.72425	1.59532	0.784039	0.677411	9.27293	5.52398	4.29644	3.7799	4.31604	8.52263	0	3.9246	2.00231	0.808887	4.58384	0	5.32891	0	2.12926	5.03154	0	0.971359	1.76472	3.06359	4.25596	3.35157	4.66495	1.88892	5.12546	4.72059	7.93267	5.2029	0	1.0578	1.59918	2.6905	1.55158	2.24764	0	2.74466	2.11372	3.46614
FBgn0030870	CG6398	protein_coding	X	2.12879	1.53897	2.89116	4.28645	33.5182	31.5075	18.8169	24.3868	0	0.613776	0.716073	0	2.15802	1.21752	1.58348	1.9623	4.67207	3.23555	1.14596	2.77906	4.44076	7.65504	2.12926	3.35436	13.9386	9.71359	6.17652	2.04239	0	0	0	0	2.27798	1.34874	0	0	1.6534	5.28902	3.19837	2.6905	1.55158	1.68573	2.41439	2.74466	16.2052	8.08765
FBgn0034687	CG11475	protein_coding	2R	0	0	0	0	0.74485	0	0	0	0	0	0	0	0	0	0	0	0	0	0	0	0	0	0	0	0	0	0	0	0	0	0	0	0	0	0	0	0	0	0	0	0	0	0	1.37233	0	0
FBgn0034527	CG9945	protein_coding	2R	0	1.53897	4.33674	3.42916	4.4691	4.38712	0.784039	0	1.85459	2.4551	0	2.83492	0	2.43504	1.58348	1.9623	8.67669	4.04444	2.29192	2.77906	1.7763	2.55168	0	0	4.18157	3.88544	2.64708	1.0212	1.06399	0	3.49871	1.88892	0.569496	0.674369	3.39972	2.60145	6.61359	4.23122	1.59918	0	3.10316	0.56191	0	2.74466	0.704574	3.46614
FBgn0039131	CG12268	protein_coding	3R	0	0	0	0	5.9588	2.39298	2.35212	2.70964	0	0	0	0	0	0	0	0	23.3603	28.3111	21.7733	29.1801	0	0	0	0	1.39386	4.85679	0	0	0	0	0	0	0	0	1.13324	0	14.8806	16.9249	22.3886	21.524	0.775791	0	0	1.37233	2.8183	3.46614
FBgn0000179	bi	protein_coding	X	0	0	1.44558	0	0.74485	0.39883	0	0	0	0	0	0	0	0	0	0	0	0	0	0	0	0	0	0	0	0	0	0	0	0	0	0	0	0	0	0	0	0	0	0	0.775791	1.12382	0	0	0	0.577689
FBti0063125		transposable_element	2R	0	0	0	0	0	0	0	0	0	0	0	0	0	0	0	0	0	0	0	0	0.888152	0	0	0	0	0	0	0	0	0	0	0	0	0	0	0	0	0	0	0	0	0	0	0	0	0
FBgn0032124	CG17855	protein_coding	2L	0	0	1.44558	0	0	0.39883	0.784039	1.35482	0	0	0	0	0	0	0	0	0	0	0	0	0	0	0	0	0	0	0	0	0	0	0	0	0	0	0	0	0	0	0	0	0	0	0	0	0	0.577689
FBti0062985		transposable_element	2L	0	0	0	0	0	0	0	0	0	1.22755	0	0	0	0	3.16697	1.9623	0	0	0	0	0	0	0	0	1.39386	1.94272	0.88236	0	0	0	1.16624	0	2.84748	2.02311	0	0	0	0	0	0	0	0	0	0	0	0
FBgn0003162	Pu	protein_coding	2R	1.0644	47.708	7.2279	15.4312	1.4897	0.797659	0	0.677411	0	0	0	0	4.31604	0	1.58348	0	5.3395	4.04444	1.14596	0	16.8749	8.93088	6.38777	3.35436	1.39386	0	0	1.0212	0	0	0	0	1.70849	2.02311	1.13324	0	1.6534	3.17341	1.59918	0	6.20633	2.80955	2.41439	10.9786	0.704574	0
FBgn0000810	fs(1)K10	protein_coding	X	1.0644	0	0	0.857289	1.4897	2.39298	0.784039	0.677411	1.23639	1.22755	1.43215	1.88995	4.31604	2.43504	1.58348	3.9246	0.667438	0.808887	1.14596	0	0	0	2.12926	0	2.78771	0.971359	0.88236	3.06359	1.06399	0	3.49871	2.83338	1.13899	3.37185	1.13324	2.60145	0	0	0	0	0.775791	1.12382	2.41439	0	1.40915	1.73307
FBgn0013323	Ptth	protein_coding	2L	0	0	0	0	1.4897	0	0.784039	0.677411	0.618195	0	0	0	0	0	0	0	0	0	0	0	0	0	0	0	2.78771	1.94272	0.88236	2.04239	0	0	4.66495	2.83338	0	0	0	0	0	0	0	0	0	0	0	0	2.8183	4.04383
FBgn0030725	CG8958	protein_coding	X	0	0	0	0	0	0.39883	0	0	0	0	0	0	1.07901	0	1.58348	1.9623	0	0	0	0	0	0	0	0	0	0	0	0	0	0	2.33247	1.88892	0.569496	0	0	0	0	0	0	0	0	0	0	0	0	0
FBgn0003046	Pcp	protein_coding	2L	20.2235	784.874	118.538	135.452	1.4897	0.39883	2.35212	0.677411	0	0	0	0.944975	0	0	0	0	0	0	0	0	638.581	164.583	321.518	72.1187	2.78771	0	1.76472	1.0212	0	0	0	0	0	0	0	0	0	0	0	0	105.508	60.1244	60.3597	164.679	1.40915	1.15538
FBgn0035139	CG13891	protein_coding	3L	0	0	0	0	0	0	0	0	0	0	0	0	0	0	0	0	0	0	0	0	0	0	0	0	0	0	0	0	0	0	0	0	0	0	0	0	0	0	0	0	0	0.56191	0	0	0	0
FBgn0033214	CG1941	protein_coding	2R	0	1.53897	1.44558	0.857289	0	0	0	0	0	0	0	0	0	0	1.58348	0	1.33488	4.04444	2.29192	1.38953	3.55261	0	0	0	0	0	0	0	0	0	0	0	0	0	0	0	1.6534	1.0578	3.19837	2.6905	0.775791	0.56191	0	0	0	0
FBti0062552		transposable_element	3R	0	0	0	0	0	0	0	0	0	0	0	0	0	0	0	0	0	0	0	0	0	1.27584	0	0	0	0	0	0	0	0	0	0	0	0	0	0	0	0	0	0	0	0	0	0	0	0
FBgn0033392	CG8027	protein_coding	2R	0	0	0	0	0.74485	0	0	0	0	0	0	0	0	1.21752	0	0	0	0.808887	0	0	0	0	2.12926	0	0	0	0.88236	0	0	0	0	0	0	0	1.13324	1.30073	0	2.11561	3.19837	0	0	0	0	2.74466	0	0
FBgn0265910	lncRNA:CR44699	ncRNA	2L	0	0	0	0	0	0	0	0	0	0	0	0	0	0	0	0	0	0	0	0	0	0	0	0	0	0	0	0	0	0	0	0	0	0	0	0	0	0	0	0	0	0	1.20719	0	0	0
FBgn0266901	lncRNA:CR45361	ncRNA	2L	8.51518	3.07794	0	2.57187	2.23455	4.38712	0.784039	1.35482	9.89112	15.9582	17.9018	19.8445	12.9481	20.6978	30.0862	17.6607	0	1.61777	0	1.38953	7.99337	3.82752	0	5.03154	9.75699	8.74223	6.17652	12.2544	26.5998	31.8399	38.4858	18.8892	40.4342	37.0903	49.8625	24.7138	3.3068	2.11561	0	0	10.0853	1.12382	0	5.48931	6.34117	8.66534
FBgn0050187	CG30187	protein_coding	2R	0	0	1.44558	0	2.23455	1.99415	3.13616	1.35482	0	2.4551	0.716073	0	0	0	0	0	0	0	0	0	0	0	0	0	4.18157	11.6563	1.76472	2.04239	0	0	1.16624	0	0.569496	0	1.13324	0	0	0	3.19837	0	1.55158	0	1.20719	1.37233	4.22744	4.04383
FBgn0031018	narya	protein_coding	X	0	0	0	0	0.74485	0	0	0	0	0	0.716073	0	0	0	0	0	0	0	0	0	0	0	0	0	0	0	0	0	0	1.67578	0	0	0	0	0	0	0	0	0	0	0	0	0	0	0	0
FBgn0037777	CG11722	protein_coding	3R	1.0644	0	0	0.857289	0	0.39883	0.784039	0.677411	2.47278	3.68265	2.14822	0	3.23703	2.43504	0	3.9246	0	0	0	2.77906	0.888152	1.27584	2.12926	0	0	0	0.88236	1.0212	3.19197	1.67578	4.66495	5.66677	1.70849	3.37185	2.26648	6.50363	0	1.0578	0	0	0.775791	1.12382	3.62158	1.37233	2.8183	2.31076
FBgn0046685	Wsck	protein_coding	3R	1.0644	0	0	0	8.19335	6.38127	3.13616	5.41929	0	1.22755	0	0	1.07901	0	0	0	1.33488	0	2.29192	0	0	0	4.25852	0	5.57542	1.94272	3.52944	0	0	0	0	0	0.569496	0.674369	0	0	0	3.17341	0	0	0	0	0	1.37233	3.52287	2.31076
FBgn0022942	Cbp80	protein_coding	X	17.0304	20.0066	27.466	28.2905	29.794	34.2993	30.5775	24.3868	51.9284	55.2398	42.9644	41.5789	11.8691	12.1752	17.4183	25.5099	23.3603	19.4133	14.8975	26.401	23.9801	5.10336	14.9048	6.70872	25.0894	25.2553	21.1766	27.5723	19.1518	21.7852	12.8286	28.3338	7.40344	8.7668	12.4656	9.10508	13.2272	10.578	6.39673	8.07151	20.1706	26.4098	16.9007	24.7019	21.1372	24.8406
FBgn0034380	Vps51	protein_coding	2R	0	0	0	0	0.74485	1.19649	0.784039	0.677411	0.618195	0.613776	2.14822	0	0	1.21752	0	0	0.667438	0	2.29192	1.38953	0.888152	1.27584	0	0	0	1.94272	5.29416	4.08479	0	1.67578	0	0	0	1.34874	3.39972	0	0	1.0578	0	0	1.55158	0	2.41439	1.37233	1.40915	1.15538
FBgn0266388	asRNA:CR45028	ncRNA	3R	0	0	0	0	0	0	0	0	0	0	0	0	0	0	0	0	0	0	0	0	0	0	0	0	0	0	0	0	0	0	0	0	0	0	0	0	0	0	0	0	0	0	0	0	0	0
FBgn0029830	Grip	protein_coding	X	0	1.53897	0	1.71458	54.374	51.449	43.1222	57.5799	43.8919	39.8954	57.2858	46.3038	7.55307	17.0453	25.3357	9.81149	6.67438	1.61777	3.43788	1.38953	0.888152	0	0	0	39.0279	47.5966	48.5298	66.3778	25.5358	36.8672	23.3247	21.7226	6.26445	6.74369	13.5989	5.2029	1.6534	12.6937	11.1943	2.6905	12.4127	3.93337	6.03597	17.8403	39.4561	59.502
FBgn0040235	c12.1	protein_coding	X	12.7728	13.8507	7.2279	9.43018	26.0697	26.3227	18.8169	22.3546	16.6913	27.0061	12.8893	29.2942	15.1061	7.30511	17.4183	11.7738	14.0162	16.1777	14.8975	9.7267	8.88152	2.55168	6.38777	1.67718	30.6648	11.6563	13.2354	20.4239	18.0878	20.1094	12.8286	15.1114	7.40344	4.72059	1.13324	3.90218	3.3068	4.23122	4.79755	2.6905	9.30949	8.99057	3.62158	8.23397	16.2052	14.4422
FBgn0004396	CrebA	protein_coding	3L	17.0304	10.7728	36.1395	24.0041	9.68304	31.1087	21.1691	19.6449	23.4914	21.4822	20.05	17.9545	22.6592	21.9153	15.8348	31.3968	4.67207	1.61777	2.29192	2.77906	19.5393	38.2752	23.4218	16.7718	45.9972	37.883	44.118	41.8691	18.0878	20.1094	17.4936	20.7782	17.0849	15.5105	10.1991	13.0073	4.96019	1.0578	1.59918	2.6905	13.9642	15.1716	21.7295	10.9786	24.6601	27.7291
FBgn0040817	CG14132	protein_coding	3L	3.19319	98.494	10.1191	6.00102	15.6418	10.3696	6.27232	14.2256	1.23639	2.4551	2.86429	0.944975	0	0	3.16697	0	12.0139	22.6488	24.0652	31.9592	40.855	3.82752	4.25852	11.7403	41.8157	87.4223	87.3537	58.2083	0	0	2.33247	0	0.569496	2.02311	0	0	16.534	12.6937	17.591	18.8335	3.87895	5.6191	7.24316	16.4679	15.5006	17.9084
FBgn0027594	drpr	protein_coding	3L	8.51518	29.2404	8.67348	9.43018	23.8352	18.745	26.6573	29.1287	6.80015	8.59286	4.29644	2.83492	4.31604	1.21752	11.0844	5.8869	20.0231	12.9422	10.3137	11.1162	32.8616	17.8618	17.0341	6.70872	30.6648	29.1408	33.5297	33.6995	15.9599	10.0547	12.8286	5.66677	13.0984	8.09243	2.26648	13.0073	24.801	32.7919	20.7894	21.524	81.458	17.4192	6.03597	68.6164	36.6378	28.3068
FBgn0050360	Mal-A6	protein_coding	2R	0	0	0	0	0	0	0	0	0.618195	0	0	0	0	0	0	0	0	0	0	0	0	0	0	0	0	0	0	0	0	0	0	0	0	0	0	0	0	0	0	0	0	0	0	0	0	0
FBgn0029856	CG11700	protein_coding	X	0	0	1.44558	3.42916	0	0.39883	0.784039	0.677411	0	0	0	0	0	1.21752	0	0	1.33488	4.85332	2.29192	4.16859	0	1.27584	2.12926	0	0	0	0.88236	0	0	0	0	0	0	0	0	0	4.96019	4.23122	1.59918	0	1.55158	0	0	1.37233	0	0
FBgn0038993	CG13843	protein_coding	3R	0	0	0	0	0	0	0	0	0	0	0	0	0	0	0	0	0	0	0	0	0	0	0	0	0	0	0	0	0	0	0	0	0	0	0	0	0	0	0	0	0	0	0	0	0	0
FBgn0011566	Smyd3	protein_coding	X	3.19319	1.53897	0	5.14373	0.74485	0.797659	3.13616	1.35482	1.23639	1.22755	0.716073	0.944975	7.55307	2.43504	1.58348	0	0	0	0	0	0	7.65504	0	1.67718	1.39386	1.94272	0.88236	1.0212	0	0	0	1.88892	1.70849	0	1.13324	1.30073	0	0	0	0	0	1.68573	4.82878	0	2.8183	1.15538
FBgn0032785	CG10026	protein_coding	2L	1.0644	0	0	4.28645	7.4485	6.7801	3.9202	2.70964	1.23639	0.613776	0	0	5.39505	4.87007	9.5009	9.81149	0	0	1.14596	2.77906	5.32891	7.65504	4.25852	3.35436	5.57542	7.77087	7.05888	2.04239	1.06399	1.67578	1.16624	0	6.26445	3.37185	3.39972	2.60145	1.6534	0	0	0	0.775791	0.56191	2.41439	0	9.15946	2.31076
FBgn0033431	CG1827	protein_coding	2R	10.644	4.61691	8.67348	5.14373	17.1315	21.5368	28.2254	23.032	2.47278	4.29643	5.01251	1.88995	3.23703	1.21752	6.33393	7.84919	2.66975	1.61777	1.14596	4.16859	7.10522	6.3792	14.9048	13.4174	33.4525	34.9689	27.3532	22.4663	7.44793	6.70313	11.6624	5.66677	5.12546	2.69748	2.26648	10.4058	0	0	0	5.381	10.0853	7.30483	10.8647	6.86164	32.4104	21.9522
FBgn0264556	Gr39a	protein_coding	2L	0	0	0	0	0	0	0	0	0	0	0	0	1.07901	0	0	0	0	0	0	0	0	0	0	0	0	0	0	0	0	0	0	0	0	0	0	0	0	0	0	0	0	0	0	0	0	0
FBgn0264273	Sema2b	protein_coding	2R	0	1.53897	0	1.71458	32.0285	43.0736	21.9531	18.2901	0.618195	0	0	0	0	0	1.58348	0	0	0	1.14596	0	0	2.55168	2.12926	1.67718	6.96928	3.88544	10.5883	4.08479	0	0	0	0	0	0.674369	0	1.30073	0	0	0	0	2.32737	0.56191	0	0	23.9555	8.08765
FBti0018962		transposable_element	2R	0	0	0	0	0	0	0	0	0	0.613776	0	0	0	0	0	0	0	0	0	0	0	0	0	0	0	0	0	0	0	0	0	0	0	0	0	0	0	0	0	0	0	0	0	0	0	0
FBgn0004611	Plc21C	protein_coding	2L	12.7728	24.6235	37.5851	39.4353	1.4897	0	2.35212	0.677411	8.65473	7.36531	2.14822	2.83492	2.15802	2.43504	1.58348	3.9246	6.67438	5.66221	2.29192	0	51.5128	42.1027	70.2655	43.6067	1.39386	0	1.76472	0	2.12798	1.67578	4.66495	0.944461	1.70849	6.06932	4.53295	2.60145	6.61359	5.28902	3.19837	2.6905	85.337	52.2577	48.2878	130.371	1.40915	1.15538
FBgn0004395	unk	protein_coding	3R	25.5455	10.7728	39.0307	32.577	35.0079	32.704	29.0095	27.7738	9.89112	7.97908	5.01251	6.61482	2.15802	1.21752	0	5.8869	40.0463	46.9155	29.795	31.9592	12.4341	47.2061	46.8437	58.7013	47.3911	43.7112	37.9415	43.9115	8.51192	11.7305	8.16366	5.66677	5.12546	4.72059	3.39972	0	82.6699	72.9885	63.9673	78.0246	44.2201	65.7435	22.9367	32.9359	31.0013	37.5498
FBgn0263510	nclb	protein_coding	2R	0	0	1.44558	3.42916	10.4279	7.57776	14.8967	9.48375	55.6376	47.8745	47.9769	38.744	5.39505	2.43504	7.91742	21.5853	3.33719	0.808887	4.58384	4.16859	1.7763	1.27584	0	1.67718	1.39386	3.88544	12.353	5.10599	35.1117	35.1914	59.4781	59.5011	5.69496	4.04622	3.39972	1.30073	0	1.0578	0	0	3.87895	8.99057	2.41439	0	9.86404	5.77689
FBgn0030556	mRNA-cap	protein_coding	X	22.3523	20.0066	18.7925	19.7176	23.8352	24.7274	35.2818	23.7094	32.7644	27.0061	36.5197	22.6794	20.5012	32.873	33.2532	25.5099	14.6836	19.4133	16.0435	19.4534	14.2104	20.4134	25.5511	20.1262	15.3324	17.4845	26.4708	25.5299	11.7039	18.4336	13.9948	27.3894	19.9323	15.5105	19.2651	13.0073	19.8408	16.9249	15.9918	21.524	27.1527	25.8479	16.9007	24.7019	21.8418	24.263
FBti0019171		transposable_element	2L	0	0	0	0	0	0	0	0	0	0	0	0	0	1.21752	0	0	0	0	0	0	0	0	0	0	0	0	0	0	0	0	1.16624	0	0	0.674369	0	0	0	0	1.59918	0	0	0.56191	0	0	0	0
FBgn0033934	CG17385	protein_coding	2R	21.2879	12.3118	17.347	12.8593	17.1315	14.7567	14.8967	10.8386	16.6913	25.1648	24.3465	32.1291	20.5012	26.7854	20.5853	19.623	9.34413	11.3244	21.7733	16.6743	21.3157	15.3101	27.6804	33.5436	23.6955	24.284	21.1766	29.6147	40.4316	31.8399	45.4832	36.834	25.6273	24.2773	28.331	28.616	9.92039	12.6937	7.99592	18.8335	42.6685	34.2765	42.2518	24.7019	37.3424	28.8845
FBti0060132		transposable_element	2R	0	0	0	0	0	0	0	0.677411	0	0	0	0	0	0	0	0	0	0	0	0	0	0	0	0	0	0	0	0	0	0	0	0	0	0	0	0	0	0	0	0	0	0	0	0	0	0
FBgn0004574	Rop	protein_coding	3L	6.38638	24.6235	17.347	22.2895	13.4073	15.9532	15.6808	17.6127	4.94556	7.36531	7.8768	4.72487	19.4222	13.3927	9.5009	9.81149	28.6998	21.84	21.7733	18.0639	4.44076	6.3792	8.51703	5.03154	11.1508	11.6563	16.7648	4.08479	10.6399	3.35157	10.4961	5.66677	7.40344	14.1618	6.79943	11.7065	33.068	37.0232	17.591	32.286	15.5158	14.6097	6.03597	15.0956	13.3869	10.9761
FBgn0051201	GluRIIE	protein_coding	3R	41.5115	12.3118	33.2483	30.8624	0.74485	3.19064	2.35212	2.03223	9.27293	9.82041	10.025	17.9545	35.6073	40.1781	31.6697	41.2083	2.00231	1.61777	1.14596	4.16859	10.6578	43.3786	17.0341	20.1262	6.96928	5.82815	7.05888	2.04239	19.1518	13.4063	17.4936	17.9448	50.6851	72.1575	47.596	81.9457	23.1476	20.0983	25.5869	10.762	10.0853	14.0478	35.0086	5.48931	3.52287	2.88845
FBgn0266674	Sec15	protein_coding	3R	7.45078	4.61691	2.89116	6.85831	2.9794	2.39298	3.9202	5.41929	3.70917	1.84133	6.44466	5.66985	1.07901	4.87007	1.58348	0	6.00694	1.61777	4.58384	1.38953	6.21706	2.55168	6.38777	0	5.57542	2.91408	3.52944	4.08479	4.25596	5.02735	4.66495	6.61123	1.70849	4.04622	3.39972	1.30073	4.96019	8.46244	7.99592	5.381	2.32737	4.49528	8.45036	4.11698	2.8183	2.31076
FBti0062477		transposable_element	X	0	0	0	0	0	0	0	0	0	0	0	0	0	0	0	0	0.667438	0.808887	0	0	0	0	0	0	0	0	0	0	0	0	1.16624	0	0	0	0	0	0	0	0	0	0	0	0	0	0	0
FBgn0266871	lncRNA:CR45332	ncRNA	2L	0	0	0	0	0	0	0	0	0	0	0	0	0	0	0	0	0	0	0	0	0	0	0	0	0	0	0	0	0	0	0	0	0	0	0	0	0	0	0	2.6905	0	0	0	0	0	0
FBgn0050172	CG30172	protein_coding	2R	0	0	0	0	0	0	1.56808	0	0	0	0	0	0	0	0	0	0	0	0	0	0	1.27584	0	0	0	0	0	0	0	0	1.16624	0	0	0	0	0	0	0	0	0	0	0.56191	0	1.37233	0	0
FBgn0046706	Haspin	protein_coding	2R	3.19319	0	1.44558	0.857289	2.23455	2.39298	2.35212	2.70964	2.47278	2.4551	4.29644	1.88995	0	1.21752	0	1.9623	0	0.808887	0	0	1.7763	2.55168	0	1.67718	1.39386	3.88544	3.52944	5.10599	0	0	1.16624	0	1.13899	0	0	0	0	0	0	0	1.55158	1.12382	0	1.37233	1.40915	0
FBgn0039019	HP1c	protein_coding	3R	0	0	0	0.857289	1.4897	1.19649	0.784039	1.35482	1.23639	1.22755	1.43215	1.88995	0	1.21752	1.58348	0	0	0	3.43788	2.77906	1.7763	1.27584	0	0	6.96928	0	0.88236	2.04239	0	1.67578	2.33247	0.944461	0.569496	0.674369	0	0	0	0	1.59918	0	0	0	0	0	0.704574	0.577689
FBgn0010612	ATPsynG	protein_coding	2L	209.686	69.2536	132.993	77.156	12.6624	11.1672	14.8967	13.5482	66.1469	59.5362	63.0144	71.8181	134.876	154.625	125.095	184.456	122.141	161.777	255.549	243.168	41.7432	127.584	63.8777	162.686	19.514	12.6277	26.4708	24.5087	74.4793	51.9493	64.143	83.1126	123.581	149.036	114.457	212.018	52.9087	86.74	124.736	137.216	63.6149	81.477	147.278	41.1698	33.8196	27.1514
FBgn0039172	Spase22-23	protein_coding	3R	11.7084	10.7728	14.4558	14.5739	6.70365	10.7684	10.9766	12.8708	6.18195	6.75153	6.44466	4.72487	6.47406	4.87007	12.6679	29.4345	7.34182	6.4711	6.87577	5.55812	15.0986	16.5859	10.6463	8.3859	9.75699	5.82815	7.05888	7.14838	9.57591	8.37891	15.1611	15.1114	7.97294	8.09243	15.8653	7.80435	1.6534	3.17341	6.39673	13.4525	8.5337	8.99057	15.6935	5.48931	7.75031	3.46614
FBti0020163		transposable_element	3L	0	0	0	0	0	0	0	0	0	0	0	0	0	0	0	0	0	0	0	0	0	0	0	0	0	0	0	0	0	0	1.16624	0	0	0	0	0	0	0	0	0	0	0	0	0	0	0
RR46358_transposable_element		transposable_element	3R	0	0	0	0	0	0	0	0	0	0	0	0	0	1.21752	0	0	0	0	0	0	0	0	0	0	0	0	0	0	0	0	0	0	0	0.674369	0	0	0	0	0	0	0	0	0	0	0	0
FBti0020148		transposable_element	3L	0	0	0	0	0	0	0	0	0	0	0	0	0	0	0	0	0	0	0	0	0	0	0	0	0	0	0	0	0	0	0	0	0	0	0	0	0	0	0	0	0	0	0	0	0	0
FBgn0033539	Git	protein_coding	2R	14.9016	9.23381	10.1191	10.2875	30.5388	30.311	21.1691	24.3868	42.6555	38.6679	37.2358	35.909	19.4222	21.9153	15.8348	15.6984	10.679	5.66221	14.8975	6.94764	9.76967	11.4826	6.38777	16.7718	36.2402	24.284	22.059	34.7207	24.4718	28.4883	26.8234	32.1117	8.54243	27.6491	20.3983	32.5181	16.534	24.3295	25.5869	26.905	9.30949	14.6097	18.1079	15.0956	37.3424	40.4383
FBgn0264441	lncRNA:CR43859	ncRNA	2L	9.57958	3.07794	0	1.71458	0	0	0.784039	0	0	0.613776	0	0	1.07901	0	3.16697	1.9623	0	0	0	1.38953	0	2.55168	2.12926	8.3859	1.39386	0	0.88236	0	0	0	0	0.944461	1.13899	0	0	0	0	5.28902	0	0	0	1.12382	1.20719	0	2.11372	0
FBgn0029113	Uba2	protein_coding	3L	9.57958	7.69484	11.5646	12.002	17.1315	15.5544	11.7606	18.9675	18.5459	24.551	13.6054	23.6244	3.23703	3.65256	3.16697	11.7738	3.33719	4.04444	2.29192	4.16859	8.88152	11.4826	4.25852	10.0631	19.514	18.4558	16.7648	27.5723	13.8319	26.8125	19.826	19.8337	2.27798	3.37185	5.66619	0	4.96019	3.17341	1.59918	5.381	14.74	14.6097	21.7295	10.9786	25.3647	23.6853
FBgn0002945	nkd	protein_coding	3L	6.38638	16.9287	5.78232	6.85831	17.1315	23.5309	13.3287	14.2256	1.23639	0.613776	2.14822	1.88995	2.15802	1.21752	7.91742	0	16.0185	25.0755	8.02173	20.8429	11.546	8.93088	19.1633	10.0631	12.5447	9.71359	21.1766	12.2544	3.19197	1.67578	1.16624	2.83338	3.98647	4.04622	3.39972	2.60145	11.5738	6.34683	7.99592	5.381	9.30949	5.05719	3.62158	2.74466	17.6144	19.6414
FBti0019528		transposable_element	X	0	0	0	0	0	0	0	0	0	0	0	0	0	0	0	0	0	0	0	0	0	0	0	0	0	0	0	0	0	0	0	0	0	0	0	0	0	0	0	0	0	0	0	0	0	0
FBgn0035287	CG13937	protein_coding	3L	0	0	0	0	0	0.39883	0	0	0.618195	0	0.716073	0	3.23703	2.43504	3.16697	1.9623	2.00231	0	0	1.38953	0	3.82752	0	0	0	0	1.76472	0	2.12798	1.67578	3.49871	0	1.70849	2.69748	9.06591	1.30073	0	0	1.59918	0	0.775791	0	0	0	0.704574	0
FBgn0011290	Taf12	protein_coding	3R	1.0644	4.61691	4.33674	1.71458	4.4691	9.17308	7.05635	7.45152	7.41834	12.8893	8.59287	9.44975	3.23703	6.08759	1.58348	1.9623	12.6813	9.70665	12.6056	9.7267	9.76967	7.65504	2.12926	5.03154	4.18157	6.79951	5.29416	7.14838	17.0238	5.02735	12.8286	12.278	7.97294	8.09243	9.06591	3.90218	21.4942	15.8671	12.7935	26.905	9.30949	7.30483	10.8647	6.86164	9.86404	5.1992
FBgn0082998	snoRNA:Psi28S-1192d	snoRNA	X	0	0	0	0	0	0	0	0	0.618195	0	0	0.944975	0	0	0	0	0	0	0	0	0	0	0	0	0	0	0	0	0	0	0	0	0	0	0	0	0	0	0	0	0	0	0	0	0	0
FBgn0035868	CG7194	protein_coding	3L	0	0	4.33674	0	0.74485	1.99415	2.35212	1.35482	0.618195	0	1.43215	0.944975	0	0	0	0	0	0	0	0	0	1.27584	0	0	0	0	0.88236	1.0212	1.06399	0	1.16624	0.944461	0	1.34874	0	0	1.6534	0	0	0	0	1.12382	1.20719	0	2.8183	4.04383
FBgn0040907	mRpL33	protein_coding	X	3.19319	0	1.44558	0.857289	1.4897	1.19649	0.784039	0	1.85459	2.4551	5.01251	2.83492	1.07901	2.43504	3.16697	5.8869	2.00231	3.23555	0	4.16859	1.7763	1.27584	2.12926	3.35436	5.57542	6.79951	6.17652	3.06359	4.25596	5.02735	4.66495	5.66677	6.26445	4.04622	7.93267	7.80435	0	0	1.59918	0	0.775791	0.56191	8.45036	0	2.8183	2.31076
FBti0063807		transposable_element	3L	0	0	1.44558	0	0	0.39883	0	0.677411	0	0	0	0	0	0	0	0	0	0	0	0	0	0	0	0	0	0	0	0	0	0	0	0	0	0	0	0	0	0	0	0	0.775791	0	0	0	0	0
FBgn0011723	byn	protein_coding	3L	0	0	0	0	0	0	0	0	0	0	0	0	0	0	0	0	0	0	0	0	0	0	0	0	0	0	0	0	0	0	0	0	0	0	0	0	0	0	0	0	0	0	0	0	0	0
FBgn0036680	Cpr73D	protein_coding	3L	0	0	0	0	0	0	0	0	0	0	0	0	0	0	0	0	0	0	0	0	0.888152	0	0	1.67718	0	0.971359	0	0	0	0	0	0	0.569496	0	0	0	0	0	1.59918	0	0	0.56191	0	0	0	0.577689
FBgn0037747	Naa80	protein_coding	3R	14.9016	1.53897	15.9014	1.71458	2.9794	3.19064	3.9202	0	0	0	0	0	3.23703	0	0	0	24.6952	20.2222	50.4223	31.9592	1.7763	15.3101	2.12926	30.1892	2.78771	1.94272	2.64708	2.04239	0	0	1.16624	0.944461	0.569496	0	1.13324	0	74.4029	51.8324	78.36	53.81	0.775791	3.37146	9.65755	0	0.704574	1.73307
FBgn0039486	CAH9	protein_coding	3R	0	0	0	0.857289	0	0	0	0	0	0	0	0	0	0	0	0	0.667438	1.61777	0	4.16859	0	0	0	0	0	0	0	0	0	0	0	0	0	0	0	0	3.3068	1.0578	3.19837	8.07151	0	0	1.20719	0	0	0
FBgn0053252	CG33252	protein_coding	X	0	0	0	0	0	0	0	0	0	0	0	0	0	0	0	0	0	0	0	0	0	0	0	0	0	0	0	0	0	0	0	0	0	0	0	0	0	0	0	0	0	0	0	0	0	0
FBgn0039228	CG6980	protein_coding	3R	0	0	0	0	0	0	0	0	0	0	0	0	0	0	0	0	0	0	0	0	0.888152	0	0	0	0	0	0	0	0	0	1.16624	0	0	0	0	0	0	0	0	0	0	0	0	0	0.704574	0
FBgn0039073	CG4408	protein_coding	3R	0	1.53897	0	0	1.4897	0.39883	0	2.03223	0	0	0	0	0	0	0	0	0.667438	0.808887	0	0	0	0	0	0	0	0	0	1.0212	0	0	1.16624	0	0	0	0	0	0	0	0	0	1.55158	0	0	2.74466	1.40915	2.88845
FBgn0027779	VhaSFD	protein_coding	2L	173.497	147.741	118.538	135.452	88.6371	94.1238	88.5965	102.289	82.22	90.225	87.3609	102.057	120.849	120.534	95.009	104.002	101.451	101.111	132.931	105.604	64.8351	56.137	55.3607	63.7328	64.1173	81.5942	77.6477	57.1871	56.3915	46.9219	38.4858	34.9451	69.4785	61.3676	66.8611	83.2464	89.2835	62.4105	97.5502	75.3341	70.597	54.5053	72.4316	64.4994	64.8208	64.1235
FBgn0040256	Ugt35C1	protein_coding	3R	0	0	0	0	0	0	0	0	0	0	0	0	0	0	0	0	4.67207	2.42666	0	1.38953	0	0	0	0	0	0	0	0	0	0	0	0	0	0	0	0	0	0	3.19837	0	0	0	0	0	0	0
FBgn0263667	Lpt	protein_coding	2R	1.0644	3.07794	4.33674	0	1.4897	3.19064	0.784039	5.41929	1.23639	4.29643	2.86429	1.88995	0	1.21752	0	1.9623	4.00463	1.61777	3.43788	5.55812	0.888152	2.55168	2.12926	6.70872	2.78771	2.91408	3.52944	6.12718	0	5.02735	2.33247	3.77785	3.41697	0.674369	0	1.30073	6.61359	5.28902	1.59918	2.6905	5.43054	2.24764	1.20719	2.74466	4.93202	4.04383
FBgn0039404	CG14543	protein_coding	3R	0	1.53897	0	0.857289	0.74485	0.39883	1.56808	2.03223	0.618195	6.13776	2.14822	1.88995	2.15802	2.43504	0	0	1.33488	1.61777	1.14596	0	0	0	0	0	2.78771	0	1.76472	2.04239	3.19197	3.35157	6.99742	3.77785	0.569496	0.674369	0	1.30073	0	0	0	0	0.775791	0.56191	1.20719	0	0.704574	1.73307
FBgn0264905	lncRNA:CR44096	ncRNA	3R	0	0	0	0	0	0	0	0	0	0	0	0	0	0	0	0	0	0	0	0	0	0	0	0	0	0	0	0	0	0	0	0	0	0	0	0	0	0	0	0	0	0	0	0	0	0
FBgn0263133	mEFG1	protein_coding	2L	1.0644	4.61691	2.89116	0.857289	6.70365	5.98244	4.70424	6.0967	68.0015	61.9914	58.0019	43.4688	96.0319	96.184	85.5081	98.1149	10.0116	12.1333	11.4596	13.8953	0	1.27584	0	5.03154	8.36313	6.79951	5.29416	3.06359	45.7516	55.3008	37.3196	69.8901	58.658	51.2521	44.1963	53.3297	1.6534	5.28902	0	13.4525	1.55158	0.56191	0	0	5.63659	6.93227
FBgn0029708	CG3556	protein_coding	X	0	0	0	0	0.74485	0.39883	0	0.677411	0	1.22755	3.58036	2.83492	0	0	0	0	0	0	0	0	0	0	0	0	1.39386	0	2.64708	0	3.19197	0	0	0	0	0	1.13324	0	0	0	0	0	0	1.12382	0	0	0	0
FBti0061946		transposable_element	X	0	0	0	0	0	0	0	0	0	0	0.716073	0	0	0	0	0	0	0	0	0	0	0	0	0	0	0	0	0	0	0	0	0	0	0	0	0	0	0	0	0	0	0	0	0	0	0
FBgn0033480	mRpL42	protein_coding	2R	13.8372	0	15.9014	6.85831	5.21395	3.9883	3.13616	2.03223	13.6003	12.2755	10.025	17.9545	29.1333	32.873	38.0036	31.3968	3.33719	4.85332	3.43788	6.94764	3.55261	5.10336	2.12926	10.0631	5.57542	6.79951	7.05888	6.12718	15.9599	10.0547	25.6572	25.5005	24.4883	29.6723	32.8639	29.9167	3.3068	3.17341	6.39673	13.4525	3.87895	6.74292	7.24316	8.23397	9.15946	9.82072
FBgn0038342	B9d1	protein_coding	3R	0	0	0	0	0	0	0	0	0	0	0.716073	0	0	0	0	0	0	0	0	0	0	0	0	0	0	0	0	0	0	0	0	0	0	0	0	0	0	0	0	0	0	0.56191	0	0	0	0
FBgn0005674	GluProRS	protein_coding	3R	12.7728	0	4.33674	5.14373	22.3455	24.3286	16.4648	15.5804	74.1834	65.0602	47.9769	76.543	21.5802	35.308	30.0862	27.4722	5.3395	7.27999	5.72981	9.7267	1.7763	7.65504	0	3.35436	12.5447	8.74223	12.353	12.2544	46.8156	70.3829	79.3041	85.0015	27.3358	28.3235	24.9312	29.9167	1.6534	1.0578	4.79755	10.762	2.32737	5.6191	12.0719	1.37233	15.5006	12.1315
FBgn0011768	Fdh	protein_coding	3R	59.6062	32.3183	33.2483	37.7207	26.0697	17.5485	29.0095	25.0642	55.0194	52.1709	47.9769	51.9736	85.2418	86.4438	66.5063	86.3411	78.0902	70.3732	87.093	56.9707	32.8616	30.6202	46.8437	55.3469	23.6955	34.9689	30.0002	35.7419	46.8156	35.1914	44.317	45.3341	69.4785	68.1113	88.3926	70.2392	28.1078	35.9653	30.3845	53.81	33.359	50.5719	82.0892	50.7761	60.5934	48.5259
FBgn0030344	Nrd1	protein_coding	X	4.25759	0	0	0.857289	1.4897	6.7801	1.56808	1.35482	3.70917	1.84133	2.86429	5.66985	1.07901	0	3.16697	1.9623	1.33488	0.808887	2.29192	1.38953	0	1.27584	0	1.67718	6.96928	1.94272	3.52944	4.08479	1.06399	1.67578	1.16624	6.61123	2.84748	2.69748	4.53295	0	1.6534	0	0	2.6905	1.55158	0	1.20719	2.74466	1.40915	2.31076
FBti0059660		transposable_element	2R	0	0	0	0	0	0	0	0	0	0	0	0	0	0	0	0	0	0	0	0	0	0	0	0	0	0	0	0	0	0	0	0	0	0	0	0	0	0	0	0	0.775791	0	0	0	0	0
FBgn0030520	Pdcd4	protein_coding	X	206.493	143.124	229.847	173.172	190.681	175.485	185.033	176.127	203.386	190.884	171.141	168.206	24.8172	35.308	28.5027	17.6607	42.716	46.1066	49.2763	47.244	124.341	195.204	140.531	221.388	142.173	114.62	172.943	171.561	261.742	323.426	215.754	190.781	59.797	82.2731	67.9943	75.4421	36.3748	68.7573	47.9755	34.9765	93.8707	144.973	133.999	126.254	157.12	143.845
FBgn0005648	Pabp2	protein_coding	2R	5.32199	29.2404	13.0102	19.7176	40.9667	39.0853	52.5306	43.3543	55.0194	41.7368	30.0751	44.4138	45.3184	28.0029	30.0862	7.84919	4.67207	6.4711	5.72981	8.33717	8.88152	10.2067	10.6463	6.70872	40.4218	31.0835	30.0002	30.6359	21.2798	33.5157	25.6572	24.556	8.54243	11.4643	5.66619	5.2029	4.96019	3.17341	0	2.6905	16.2916	15.1716	7.24316	9.6063	20.4326	22.5299
FBgn0017561	Ork1	protein_coding	X	0	0	0	0	0	0	0	0	0	0.613776	0	0	0	0	3.16697	5.8869	0.667438	2.42666	0	2.77906	0	0	0	0	0	0	0	0	0	0	0	0	2.84748	1.34874	1.13324	2.60145	0	0	0	0	0	0	0	0	0	0
FBgn0037917	wkd	protein_coding	3R	13.8372	18.4676	14.4558	11.1448	11.1727	15.1555	13.3287	13.5482	4.32737	6.13776	5.01251	1.88995	1.07901	2.43504	4.75045	5.8869	20.0231	25.0755	25.2111	8.33717	10.6578	28.0685	21.2926	25.1577	16.7263	7.77087	14.1178	9.19078	5.31995	3.35157	8.16366	6.61123	3.41697	2.69748	4.53295	2.60145	16.534	23.2717	30.3845	10.762	23.2737	17.9811	24.1439	27.4466	10.5686	10.3984
RR48342_transposable_element		transposable_element	2R	0	0	0	0	0	0	0	0	0	0	0	0	0	0	0	0	0	0	0	0	0	0	0	0	0	0	0	0	0	0	0	0.944461	0	0	0	0	0	1.0578	0	0	0	0	0	0	0	0
FBgn0086365	Orct2	protein_coding	3R	0	0	1.44558	0	1.4897	0.39883	0	0.677411	0	0	0	0	0	1.21752	0	0	0	0	0	0	0	3.82752	0	0	0	0	0	0	0	0	0	1.88892	0	2.02311	0	0	0	0	0	0	2.32737	0	0	0	0	0
FBgn0017567	ND-23	protein_coding	3R	67.057	12.3118	26.0204	20.5749	8.19335	11.1672	7.05635	9.48375	64.2923	58.3087	45.1126	69.9281	199.617	217.936	220.104	200.154	25.3626	21.84	36.6708	26.401	11.546	17.8618	4.25852	10.0631	4.18157	8.74223	13.2354	4.08479	46.8156	46.9219	59.4781	67.0568	95.1058	124.084	111.057	135.275	11.5738	13.7515	19.1902	18.8335	6.98212	8.99057	9.65755	2.74466	12.6823	12.7092
FBgn0035398	Cht7	protein_coding	3L	29.8031	16.9287	17.347	15.4312	5.9588	8.77425	10.1925	7.45152	0	0	2.14822	0.944975	3.23703	17.0453	7.91742	21.5853	6.67438	3.23555	1.14596	9.7267	9.76967	34.4477	17.0341	25.1577	2.78771	6.79951	6.17652	1.0212	1.06399	0	2.33247	1.88892	6.26445	6.74369	10.1991	3.90218	1.6534	3.17341	0	0	6.20633	6.74292	6.03597	15.0956	6.34117	0.577689
FBgn0032549	CG4650	protein_coding	2L	0	0	0	0	0	0	0	0	0	0	0	0	0	0	0	0	0	0	0	0	0	0	0	0	0	0.971359	1.76472	1.0212	0	0	0	0	0	0	0	0	0	0	0	0	0	0	0	0	1.40915	1.15538
FBgn0004552	Akh	protein_coding	3L	4.25759	0	4.33674	4.28645	0	0	0	0	0	0	0	0	1.07901	0	0	0	0.667438	0	1.14596	0	5.32891	8.93088	2.12926	0	0	0	0	0	0	0	0	0	1.13899	1.34874	1.13324	1.30073	0	0	1.59918	0	1.55158	1.68573	3.62158	1.37233	0	0
FBgn0020412	JIL-1	protein_coding	3L	26.6099	73.8705	59.2688	56.5811	9.68304	5.98244	9.40847	14.2256	17.3095	14.7306	16.4697	17.9545	7.55307	13.3927	12.6679	0	2.66975	6.4711	1.14596	2.77906	99.473	52.3095	63.8777	28.5121	9.75699	5.82815	8.8236	7.14838	12.7679	5.02735	8.16366	19.8337	10.8204	6.06932	13.5989	6.50363	9.92039	4.23122	7.99592	10.762	26.3769	30.3432	48.2878	39.7975	7.04574	6.93227
FBgn0039290	CG13654	protein_coding	3R	0	0	0	0	0.74485	1.59532	0.784039	0	0	0	0	0	1.07901	0	0	0	0	0.808887	1.14596	0	1.7763	1.27584	2.12926	0	0	1.94272	0	0	1.06399	0	0	0	2.84748	0	0	1.30073	0	0	0	0	1.55158	1.12382	0	1.37233	1.40915	0
FBgn0051287	CG31287	protein_coding	3R	0	0	0	0	0	0	0	0	0	0	0	0	0	0	0	0	0	0	0	0	0	0	0	0	0	0	0	0	0	0	0	0	0	0	0	0	0	0	0	0	0	0	0	0	0	0
FBgn0036977	CG5665	protein_coding	3L	0	0	0	0	0	0	0	0	0	0	0	0	0	0	0	0	0	0	0	0	0	0	0	0	0	0	0	0	0	0	0	0	0	0	0	0	0	0	0	0	0	0	0	0	0	0
FBgn0029959	Rab39	protein_coding	X	35.1251	49.247	49.1497	52.2946	13.4073	15.5544	18.0329	8.12893	30.2916	34.9852	41.5322	49.1387	86.3208	104.707	76.0072	82.4165	42.716	42.871	27.5031	51.4126	28.4209	35.7235	59.6192	38.5751	9.75699	4.85679	4.4118	5.10599	29.7917	13.4063	25.6572	34.0006	44.9901	37.7647	38.5301	37.721	14.8806	22.2139	19.1902	16.143	31.8074	45.5147	36.2158	45.2868	14.0915	8.66534
FBgn0015010	Ag5r	protein_coding	X	0	0	0	0	0.74485	0.39883	3.13616	0	0.618195	0	0	0	0	0	0	0	0	0	0	0	0	0	0	0	0	0	0	0	0	1.67578	0	0.944461	0	0	0	0	0	0	0	0	0	0	0	0	0	0.577689
FBgn0030054	Caf1-180	protein_coding	X	0	0	0	0	10.4279	9.17308	10.1925	7.45152	1.85459	2.4551	2.14822	1.88995	2.15802	3.65256	0	1.9623	0.667438	0.808887	2.29192	5.55812	2.66446	1.27584	0	1.67718	16.7263	16.5131	12.353	16.3392	3.19197	1.67578	11.6624	4.72231	1.13899	2.69748	0	1.30073	1.6534	2.11561	0	2.6905	4.65475	1.12382	3.62158	2.74466	8.45489	7.50996
FBgn0032420	CG6583	protein_coding	2L	2.12879	0	0	0.857289	12.6624	10.3696	10.9766	11.516	0.618195	0	0.716073	0	1.07901	0	0	0	0.667438	0	1.14596	1.38953	2.66446	0	0	0	1.39386	0	1.76472	2.04239	0	0	2.33247	0.944461	0	0	1.13324	0	0	0	0	5.381	0	0.56191	0	0	7.04574	2.88845
FBgn0038577	CG12321	protein_coding	3R	5.32199	0	10.1191	11.1448	3.72425	1.99415	3.13616	2.70964	0.618195	0	2.86429	0.944975	0	2.43504	0	3.9246	38.7114	40.4444	45.8384	58.3602	23.092	6.3792	34.0681	8.3859	2.78771	2.91408	5.29416	10.212	1.06399	0	4.66495	3.77785	5.12546	6.74369	0	3.90218	28.1078	49.7168	35.182	26.905	11.6369	16.2954	12.0719	17.8403	6.34117	5.1992
FBgn0052240	CG32240	protein_coding	3L	0	0	0	0	0	0	0	0	0	0	0	0	0	0	0	0	0	0	0	1.38953	0	0	0	0	0	0	0	0	0	0	0	0	0	0	0	0	1.6534	2.11561	3.19837	2.6905	1.55158	0	0	0	0.704574	0
FBgn0003415	skd	protein_coding	3L	8.51518	13.8507	23.1293	15.4312	23.8352	26.7216	25.8733	24.3868	9.89112	12.8893	11.4572	15.1196	12.9481	13.3927	9.5009	15.6984	9.34413	12.1333	12.6056	11.1162	28.4209	15.3101	12.7755	30.1892	30.6648	27.1981	27.3532	23.4875	13.8319	11.7305	16.3273	17.9448	11.9594	18.8823	19.2651	7.80435	44.6417	41.2544	27.1861	45.7385	33.359	15.7335	22.9367	24.7019	22.5464	22.5299
FBgn0037720	CG8312	protein_coding	3R	9.57958	1.53897	7.2279	9.43018	11.9176	12.3637	6.27232	10.1612	1.23639	0.613776	0	0.944975	8.63208	7.30511	4.75045	0	1.33488	2.42666	3.43788	0	2.66446	6.3792	6.38777	5.03154	1.39386	0.971359	1.76472	1.0212	0	0	0	0	2.27798	3.37185	3.39972	2.60145	0	0	0	0	2.32737	7.30483	0	1.37233	2.8183	3.46614
FBgn0034623	CG9822	protein_coding	2R	10.644	258.547	2.89116	6.00102	0	0	0	0	0	0	0	0	0	0	0	0	0	0	0	0	84.3745	3.82752	21.2926	8.3859	0	0	2.64708	0	0	0	0	0	0	0.674369	1.13324	0	0	0	0	2.6905	7.75791	1.12382	4.82878	35.6805	0	0
FBgn0036101	NijA	protein_coding	3L	38.3183	147.741	93.9627	61.7248	17.1315	13.959	12.5446	13.5482	8.65473	5.52398	7.16073	8.50477	2.15802	3.65256	6.33393	1.9623	225.594	152.88	142.099	179.249	121.677	61.2403	110.721	43.6067	29.271	20.3985	12.353	21.4451	1.06399	10.0547	9.32989	7.55569	8.54243	6.06932	10.1991	2.60145	181.874	223.197	135.931	153.359	62.8391	65.7435	63.9813	72.7334	24.6601	25.4183
FBgn0001112	Gld	protein_coding	3R	2.12879	106.189	17.347	63.4394	0	0	0.784039	0	0.618195	0.613776	1.43215	1.88995	0	0	0	0	0	0	0	0	55.0654	28.0685	34.0681	16.7718	2.78771	0	0	1.0212	2.12798	3.35157	1.16624	0.944461	1.13899	4.04622	1.13324	0	0	0	0	0	24.0495	12.9239	6.03597	32.9359	0	0
FBgn0038344	obe	protein_coding	3R	2.12879	0	0	0.857289	0.74485	1.19649	0	0.677411	1.23639	1.22755	1.43215	0	2.15802	0	1.58348	0	0	1.61777	1.14596	0	0.888152	0	0	1.67718	0	0	0.88236	1.0212	0	0	3.49871	0.944461	1.70849	0.674369	3.39972	0	0	0	0	0	0	0.56191	1.20719	1.37233	1.40915	0.577689
FBgn0024184	unc-4	protein_coding	X	0	0	0	0	0	0	0	0	1.23639	0	0	0	1.07901	4.87007	0	0	0	0	0	0	0	0	0	0	0	0	0	0	0	0	2.33247	0	0.569496	0.674369	1.13324	1.30073	0	0	0	0	0	0	0	0	0	0
FBgn0031264	CG11835	protein_coding	2L	215.008	67.7146	115.646	183.46	331.458	337.011	283.038	239.126	1039.19	1146.53	907.264	1074.44	474.765	533.273	425.957	345.365	1.33488	2.42666	4.58384	0	100.361	188.824	104.334	194.553	228.592	156.389	137.648	206.282	517.099	630.094	521.308	522.287	235.202	182.08	214.182	235.431	1.6534	1.0578	1.59918	0	119.472	109.573	237.817	145.467	216.304	260.538
FBgn0052982	CG32982	protein_coding	2L	3.19319	73.8705	15.9014	22.2895	23.0903	29.5134	27.4414	31.8383	9.89112	6.75153	10.7411	6.61482	32.3703	35.308	39.5871	23.5476	122.809	143.173	122.618	122.279	62.1706	31.896	36.1974	16.7718	39.0279	40.7971	34.412	24.5087	15.9599	16.7578	17.4936	6.61123	24.4883	26.9748	13.5989	29.9167	190.141	129.052	156.72	180.264	25.6011	15.1716	14.4863	59.0101	55.6613	45.0598
FBgn0037678	CG16749	protein_coding	3R	0	1.53897	0	0	0	0.797659	0	0	0.618195	0	0	1.88995	0	0	0	0	0	0	0	0	0.888152	0	2.12926	1.67718	0	0	0	0	1.06399	0	0	0.944461	0.569496	0.674369	0	0	0	0	0	0	0	0	0	0	0	0
FBti0060340		transposable_element	2L	0	0	0	0	0	0.797659	0	0	0	0	0	0	0	0	0	0	0	0	0	0	0	0	0	0	0	0	0	0	0	0	0	0	0	0	0	0	0	0	0	0	0	0	0	0	0	0
FBgn0000108	Appl	protein_coding	X	0	0	0	0	0	0	0	0	0	0	0	0	0	0	0	0	0	0	0	1.38953	0	0	0	0	0	0	0	0	0	0	0	0	0	0	0	0	0	0	0	0	0.775791	0	0	0	0	0
FBgn0010414	SerT	protein_coding	2R	0	3.07794	4.33674	2.57187	0.74485	0	0	0	0	0	0	0	1.07901	0	0	0	12.0139	4.85332	2.29192	4.16859	5.32891	1.27584	19.1633	5.03154	0	0	0	0	0	0	0	0	2.84748	2.02311	2.26648	1.30073	9.92039	8.46244	7.99592	2.6905	7.75791	14.6097	3.62158	4.11698	0	0.577689
FBti0061274		transposable_element	3L	0	0	0	0	0	0	0	0	0	0	0	0	0	0	0	0	0	0	0	0	0	0	0	0	0	0	0	0	0	0	0	0	0	0	0	0	0	0	0	0	0	0.56191	0	0	0	0
FBgn0083983	mRpL34	protein_coding	2R	2.12879	0	0	0	0.74485	0	0.784039	0	1.23639	1.22755	2.86429	0	3.23703	2.43504	4.75045	1.9623	0.667438	0	0	2.77906	0.888152	0	0	0	0	0.971359	0	1.0212	2.12798	0	8.16366	2.83338	3.98647	2.69748	4.53295	2.60145	1.6534	0	0	0	0	0	1.20719	0	0.704574	0.577689
FBgn0041194	Prat2	protein_coding	3L	0	0	0	0	0	0	0	0	0	0	0	0	3.23703	2.43504	4.75045	3.9246	6.00694	6.4711	17.1894	11.1162	0	0	0	0	0	0	0	0	0	0	0	0	4.55596	9.44117	3.39972	2.60145	0	6.34683	0	10.762	0	0	0	0	0	0
FBgn0036334	CG11267	protein_coding	3L	4.25759	6.15588	4.33674	6.00102	5.9588	5.18478	5.48828	4.74187	105.093	93.2939	99.5341	101.112	66.8986	77.9212	63.3393	139.323	33.3719	38.8266	30.941	31.9592	3.55261	7.65504	6.38777	6.70872	11.1508	7.77087	7.05888	6.12718	79.7993	73.7344	108.46	128.447	72.3259	74.855	86.1261	93.6522	8.26699	6.34683	0	43.048	6.20633	2.24764	7.24316	0	7.04574	5.77689
RR48352_transposable_element		transposable_element	3R	0	0	0	1.71458	2.9794	0.39883	0.784039	2.03223	0.618195	1.22755	0	0	0	0	0	0	1.33488	1.61777	0	0	0	0	0	0	0	0	0	0	0	0	0	0	0	0	0	0	0	0	0	0	0	0	0	0	0	0.577689
FBgn0260484	HIP	protein_coding	X	51.0911	78.4874	41.9218	51.4373	140.777	103.297	101.141	88.7408	186.695	189.043	154.672	181.435	84.1628	86.4438	80.7577	51.0198	37.3765	29.1199	33.2329	33.3487	92.3678	75.2746	110.721	53.6697	224.411	189.415	137.648	146.031	141.511	127.359	134.117	157.725	130.414	144.315	165.453	136.576	46.2951	42.3122	31.9837	32.286	74.4759	16.2954	47.0806	16.4679	19.7281	24.8406
FBgn0264448	asRNA:CR43866	ncRNA	2L	1.0644	0	0	0	0	0	0	0	0	0	0	0	0	0	0	0	0	0	0	0	0	0	0	0	0	0.971359	0	0	0	0	0	0	0	0	0	0	0	0	0	0	0	0	0	0	0	0
FBgn0051072	Lerp	protein_coding	3R	17.0304	6.15588	26.0204	18.8604	6.70365	4.78595	2.35212	4.74187	2.47278	1.84133	1.43215	1.88995	2.15802	2.43504	1.58348	1.9623	6.00694	7.27999	0	2.77906	10.6578	20.4134	17.0341	45.2838	0	1.94272	0	0	6.38394	3.35157	2.33247	3.77785	1.13899	2.02311	0	0	1.6534	1.0578	3.19837	0	3.87895	30.9051	24.1439	10.9786	1.40915	0.577689
FBgn0013277	Hsp70Ba	protein_coding	3R	0	0	1.44558	0	0	0.39883	0.784039	0.677411	1.23639	1.84133	0.716073	0	0	0	1.58348	1.9623	12.6813	0.808887	4.58384	6.94764	0	0	0	0	0	0	0	0	0	0	0	0	0.569496	0	1.13324	0	0	1.0578	1.59918	0	0.775791	0	0	1.37233	0	0
FBgn0037718	P58IPK	protein_coding	3R	2.12879	6.15588	1.44558	12.002	3.72425	11.1672	5.48828	6.77411	5.56376	6.13776	7.8768	5.66985	7.55307	4.87007	4.75045	17.6607	3.33719	4.85332	6.87577	6.94764	6.21706	1.27584	2.12926	1.67718	4.18157	1.94272	9.70596	3.06359	1.06399	3.35157	3.49871	4.72231	3.41697	5.39495	7.93267	3.90218	4.96019	6.34683	0	10.762	1.55158	2.80955	4.82878	2.74466	7.75031	2.88845
FBgn0031286	CG3862	protein_coding	2L	4.25759	0	1.44558	1.71458	6.70365	3.58947	3.13616	2.03223	6.18195	5.52398	3.58036	3.7799	1.07901	6.08759	1.58348	1.9623	0.667438	0.808887	0	0	0.888152	3.82752	2.12926	1.67718	1.39386	2.91408	5.29416	2.04239	1.06399	1.67578	2.33247	2.83338	1.13899	4.04622	3.39972	2.60145	0	1.0578	0	0	0.775791	3.93337	3.62158	8.23397	4.93202	6.35458
FBgn0053117	Victoria	protein_coding	2L	0	0	0	0	0	0	0	0	0	0	0	0	0	0	0	0	0	0	0	0	0	0	0	0	0	0	0	0	0	0	0	0	0	0	0	0	0	0	0	0	0	0	0	0	0	0
FBgn0031873	Gas41	protein_coding	2L	0	3.07794	1.44558	0.857289	3.72425	2.79181	3.9202	2.03223	1.85459	1.84133	4.29644	0.944975	0	1.21752	3.16697	1.9623	0	0	1.14596	0	0	0	0	0	0	2.91408	0.88236	5.10599	1.06399	5.02735	1.16624	1.88892	0.569496	0	1.13324	1.30073	0	1.0578	0	0	0.775791	0.56191	0	1.37233	2.11372	5.77689
FBgn0050109	CG30109	protein_coding	2R	0	0	1.44558	0	2.23455	1.19649	0.784039	1.35482	0.618195	1.22755	1.43215	1.88995	3.23703	2.43504	3.16697	7.84919	1.33488	1.61777	1.14596	0	0	1.27584	0	0	0	0	0	0	4.25596	3.35157	3.49871	1.88892	2.84748	2.69748	5.66619	3.90218	0	0	0	0	0.775791	0	0	0	0	1.73307
FBgn0264385	lncRNA:CR43837	ncRNA	X	0	0	0	0	0.74485	0	0	0	0	0	0	0	0	0	0	0	0	0	0	0	0	0	0	0	0	0	0	0	0	0	0	0	0	0	0	0	0	0	0	0	0	0	0	0	0	0
FBti0062070		transposable_element	3R	0	0	0	0	0	0.39883	0	0	0	0	0	0	0	0	0	0	0	0	0	0	0	0	0	0	0	0	0	0	0	0	0	0	0	0	0	0	0	0	0	0	0	0	0	0	0	0
FBgn0015295	Shark	protein_coding	2R	1.0644	6.15588	1.44558	0.857289	5.9588	2.39298	7.84039	6.77411	3.70917	5.52398	2.14822	2.83492	2.15802	4.87007	1.58348	0	3.33719	4.85332	1.14596	5.55812	0.888152	0	0	0	6.96928	3.88544	1.76472	3.06359	1.06399	0	3.49871	4.72231	0.569496	1.34874	1.13324	1.30073	1.6534	2.11561	0	0	0.775791	0	0	0	2.11372	1.15538
FBgn0286071	AdamTS-A	protein_coding	3R	4.25759	38.4742	1.44558	10.2875	8.93819	10.7684	8.62443	7.45152	9.89112	2.4551	7.16073	9.44975	24.8172	25.5679	26.9192	23.5476	2.66975	4.85332	2.29192	0	11.546	8.93088	8.51703	5.03154	8.36313	1.94272	1.76472	1.0212	9.57591	10.0547	6.99742	9.44461	10.8204	11.4643	20.3983	10.4058	1.6534	10.578	9.5951	2.6905	44.9959	4.49528	6.03597	24.7019	1.40915	4.04383
FBgn0036040	CG6749	protein_coding	3L	0	1.53897	0	0.857289	2.9794	2.39298	3.9202	5.41929	1.23639	0.613776	0.716073	0	0	1.21752	0	1.9623	0	0	0	0	0.888152	3.82752	0	1.67718	0	3.88544	1.76472	0	2.12798	0	1.16624	1.88892	4.55596	2.02311	3.39972	3.90218	0	3.17341	0	0	0.775791	0.56191	0	0	1.40915	1.15538
FBti0018904		transposable_element	2R	0	0	0	0	0	0	0	0	0	0	0	0	0	0	0	0	0	0	0	0	0	0	0	0	0	0	0.88236	1.0212	1.06399	0	0	0	0.569496	0	0	0	0	1.0578	0	0	0	0	0	0	0	0
FBgn0023479	teq	protein_coding	3L	2.12879	0	0	0.857289	1.4897	1.19649	0	0.677411	0.618195	0	0.716073	0	24.8172	20.6978	22.1688	27.4722	20.6906	21.0311	16.0435	41.6859	0	0	0	0	5.57542	0	1.76472	1.0212	0	0	1.16624	0	41.0037	33.0441	13.5989	31.2174	1.6534	17.9827	3.19837	48.429	0	0	1.20719	0	0	1.15538
FBgn0050015	CG30015	protein_coding	2R	0	3.07794	4.33674	2.57187	6.70365	6.38127	5.48828	13.5482	15.4549	8.59286	11.4572	17.0095	3.23703	2.43504	6.33393	5.8869	2.66975	4.04444	0	1.38953	0.888152	2.55168	4.25852	1.67718	6.96928	5.82815	10.5883	6.12718	25.5358	21.7852	17.4936	24.556	8.54243	4.72059	12.4656	3.90218	1.6534	3.17341	1.59918	5.381	6.98212	6.18101	0	6.86164	9.86404	6.35458
FBgn0003002	opa	protein_coding	3R	0	0	0	0	0	0	0	0	0	0	0	0	0	0	0	0	0	0	0	0	0	0	0	0	0	0	0	0	0	0	0	0	0	0	0	0	0	0	0	0	0	0	0	1.37233	0	0
FBgn0066114	GlcAT-I	protein_coding	X	4.25759	6.15588	2.89116	5.14373	5.21395	3.58947	3.9202	2.70964	3.09098	1.84133	2.86429	4.72487	2.15802	0	0	0	0.667438	4.85332	2.29192	5.55812	3.55261	1.27584	2.12926	1.67718	1.39386	0.971359	2.64708	1.0212	0	0	1.16624	0	2.27798	0.674369	0	0	4.96019	2.11561	1.59918	2.6905	2.32737	5.05719	6.03597	1.37233	7.04574	3.46614
FBgn0037070	CG11309	protein_coding	3L	0	1.53897	0	0.857289	1.4897	0.797659	0	0	1.85459	2.4551	2.14822	1.88995	2.15802	6.08759	4.75045	1.9623	2.00231	1.61777	3.43788	1.38953	0	0	0	0	1.39386	1.94272	1.76472	0	4.25596	1.67578	1.16624	5.66677	3.41697	2.02311	0	6.50363	1.6534	0	1.59918	5.381	0	0	0	0	1.40915	1.15538
FBgn0032377	CG14937	protein_coding	2L	0	1.53897	1.44558	0	0.74485	0	0	0	0.618195	0	0.716073	0.944975	0	0	0	0	0	1.61777	0	0	0	0	0	0	0	1.94272	0	0	0	0	1.16624	0	0	0.674369	0	0	0	0	0	0	0	0	1.20719	1.37233	0	0
FBgn0267180	asRNA:CR45620	ncRNA	X	0	0	1.44558	0	1.4897	0.797659	0	0.677411	0	3.06888	1.43215	0	0	0	0	0	0	0.808887	3.43788	1.38953	0	0	0	0	4.18157	0.971359	0.88236	5.10599	1.06399	0	0	0	0	0.674369	0	0	0	1.0578	3.19837	5.381	0.775791	0	0	0	0.704574	0
FBgn0027363	Stam	protein_coding	2L	21.2879	138.507	37.5851	34.2916	58.0983	60.2233	69.7795	56.2251	6.18195	6.13776	9.30895	4.72487	2.15802	2.43504	3.16697	3.9246	53.395	38.0177	41.2546	36.1277	121.677	70.1712	95.8166	62.0556	104.539	82.5655	93.5302	113.353	19.1518	21.7852	19.826	28.3338	23.9188	31.6954	20.3983	20.8116	52.9087	69.8151	47.9755	51.1195	79.9065	57.8768	41.0446	101.552	85.958	111.494
FBgn0031492	CG3542	protein_coding	2L	3.19319	4.61691	0	2.57187	2.23455	6.38127	6.27232	4.74187	3.09098	7.36531	7.8768	4.72487	3.23703	1.21752	3.16697	0	0	1.61777	0	0	1.7763	1.27584	0	5.03154	2.78771	3.88544	2.64708	5.10599	0	5.02735	8.16366	1.88892	1.70849	3.37185	3.39972	0	0	2.11561	0	0	2.32737	2.80955	2.41439	0	2.8183	4.04383
FBgn0032598	ChLD3	protein_coding	2L	0	0	0	0	0	0	0	0	0	0	0	0	0	0	0	0	0	0	0	0	0	0	0	0	0	0	0.88236	0	0	0	0	0	0	0	0	0	0	0	0	0	0	0	0	0	0	0
FBgn0021875	Zfrp8	protein_coding	2R	0	0	0	0.857289	0.74485	1.99415	1.56808	0.677411	2.47278	2.4551	1.43215	0.944975	1.07901	1.21752	1.58348	0	0.667438	0	2.29192	1.38953	0	1.27584	2.12926	0	2.78771	0.971359	0	0	0	5.02735	2.33247	3.77785	1.13899	0.674369	1.13324	1.30073	0	2.11561	0	2.6905	0	0.56191	1.20719	1.37233	1.40915	0.577689
FBgn0086254	Akr1B	protein_coding	3L	102.182	21.5456	37.5851	25.7187	39.477	43.8712	39.986	39.2898	31.528	31.9163	20.7661	44.4138	155.377	114.447	114.011	196.23	208.908	245.093	145.537	201.482	7.10522	22.9651	2.12926	16.7718	51.5726	63.1383	54.7063	58.2083	31.9197	30.1641	51.3144	28.3338	123.581	116.666	83.8596	110.562	44.6417	94.1446	51.1739	153.359	10.8611	5.05719	31.387	13.7233	63.4117	58.3466
FBgn0040900	CG17777	protein_coding	X	0	0	0	0	0	0.39883	0	0	0	0	0	0	0	0	0	0	0	0	0	0	0	0	0	0	0	0	0	0	0	0	0	0	0	0	0	0	0	0	0	0	0	1.12382	0	0	0.704574	0
FBgn0032020	strat	protein_coding	2L	2.12879	0	0	0.857289	4.4691	1.59532	1.56808	0.677411	0.618195	0.613776	0.716073	2.83492	0	0	3.16697	0	0.667438	0.808887	0	4.16859	2.66446	0	0	0	2.78771	0	1.76472	1.0212	1.06399	0	0	0	1.13899	0	0	2.60145	1.6534	2.11561	0	0	0	0	0	1.37233	2.11372	0.577689
FBgn0032601	yellow-b	protein_coding	2L	6.38638	13.8507	4.33674	16.2885	5.9588	4.38712	6.27232	12.1934	0	0	0	0.944975	3.23703	1.21752	0	0	0.667438	0.808887	0	0	15.9867	8.93088	8.51703	5.03154	5.57542	0	1.76472	1.0212	0	0	1.16624	0	0.569496	0	2.26648	2.60145	4.96019	1.0578	0	0	3.10316	2.80955	2.41439	1.37233	5.63659	4.62152
FBgn0266399	lncRNA:CR45039	ncRNA	3R	0	0	0	0	0	0	0	0	0	0	0	0	0	0	0	0	0	0	0	0	0	0	0	0	0	0	0	0	0	0	0	0	0	0	0	0	0	0	0	0	0	0	0	0	0	0
FBti0060557		transposable_element	2L	0	0	0	0	0	0	0	0	0	0.613776	0	0	0	0	0	0	0	0	0	0	0	0	0	0	0	0	0	0	1.06399	0	0	0.944461	0	0	0	0	0	0	0	0	0	0	0	0	0.704574	1.15538
FBgn0034660	Loxl2	protein_coding	2R	0	0	0	0	0	0.797659	0	0	0	0	0	0	0	0	0	0	0	0	0	0	0	0	0	0	0	0	0	0	0	0	0	0	0	0	0	0	0	0	0	0	0	0	0	0	0	0
FBgn0023521	CG3587	protein_coding	X	1.0644	4.61691	1.44558	1.71458	3.72425	5.18478	6.27232	6.0967	3.09098	5.52398	6.44466	3.7799	0	2.43504	0	1.9623	0	0.808887	0	1.38953	1.7763	3.82752	8.51703	1.67718	4.18157	3.88544	2.64708	8.16958	6.38394	8.37891	6.99742	9.44461	2.27798	2.02311	3.39972	2.60145	0	1.0578	1.59918	10.762	3.87895	0	0	1.37233	2.11372	5.1992
FBgn0032336	AstC	protein_coding	2L	0	0	0	0	0	0	0	0	0	0	0	0	0	0	0	0	0	0	0	0	0	0	0	0	0	0	0	0	0	0	0	0	0	0	0	0	0	0	0	0	0	0.56191	0	0	0	0
FBgn0031143	CG1532	protein_coding	X	17.0304	44.6301	50.5953	40.2926	7.4485	8.77425	8.62443	9.48375	43.8919	24.551	27.2108	30.2392	1.07901	8.52263	4.75045	1.9623	12.0139	12.9422	14.8975	9.7267	29.309	31.896	29.8096	31.8664	16.7263	9.71359	14.1178	14.2968	15.9599	13.4063	9.32989	15.1114	2.84748	6.74369	7.93267	1.30073	21.4942	28.5607	25.5869	10.762	26.3769	43.2671	32.5942	49.4038	19.7281	21.9522
FBgn0085276	CG34247	protein_coding	3L	0	0	0	0	0.74485	0.797659	0	2.70964	0	0	0	0	0	0	0	0	0	0	0	0	0	0	0	0	1.39386	0	0	0	0	0	0	0	0	0	0	1.30073	0	0	0	0	0	0	0	0	0.704574	0
FBti0060514		transposable_element	2R	0	0	0	0	0	0.39883	0	0	0	0	0	0	1.07901	0	0	0	0	0	0	0	0	1.27584	0	0	0	0	0	0	0	0	0	0	0	0	0	0	0	0	0	0	0	0	0	0	0	0
FBgn0041588	eIF2D	protein_coding	3R	4.25759	1.53897	4.33674	0.857289	3.72425	4.38712	4.70424	5.41929	8.65473	5.52398	5.72858	6.61482	6.47406	4.87007	6.33393	3.9246	2.66975	0.808887	2.29192	2.77906	2.66446	5.10336	6.38777	3.35436	11.1508	3.88544	14.1178	13.2756	6.38394	5.02735	5.83118	12.278	9.11193	4.72059	4.53295	2.60145	1.6534	0	0	2.6905	7.75791	7.86674	6.03597	0	4.22744	9.82072
FBgn0037094	CG7611	protein_coding	3L	67.057	104.65	66.4967	81.4425	128.859	131.614	148.967	148.353	44.5101	50.9434	55.8537	52.9186	31.2913	42.6131	42.7541	37.2837	118.804	43.6799	52.7142	98.6565	134.999	59.9645	91.5581	70.4415	174.232	171.931	155.295	216.494	43.6236	36.8672	47.8157	61.39	46.6986	53.9495	36.2636	36.4203	110.778	85.6822	68.7649	59.191	125.678	91.5914	53.1165	160.562	140.21	164.064
FBgn0032721	CG10602	protein_coding	2L	50.0267	43.0911	52.0409	66.0113	8.93819	14.7567	9.40847	18.9675	21.0186	20.2546	14.3215	28.3492	32.3703	21.9153	25.3357	17.6607	126.146	93.022	107.72	122.279	83.4863	49.7578	59.6192	58.7013	15.3324	10.6849	20.2943	25.5299	10.6399	30.1641	26.8234	29.2783	40.4342	33.0441	38.5301	55.9312	82.6699	85.6822	70.3641	34.9765	62.8391	92.7152	67.6029	79.595	19.0235	23.1076
FBgn0039557	CG12259	protein_coding	3R	4.25759	1.53897	2.89116	2.57187	3.72425	3.19064	0.784039	4.74187	1.85459	3.68265	5.72858	0.944975	3.23703	1.21752	4.75045	0	1.33488	0.808887	0	1.38953	0.888152	2.55168	0	1.67718	11.1508	5.82815	7.05888	3.06359	1.06399	1.67578	1.16624	0.944461	0.569496	1.34874	1.13324	0	1.6534	2.11561	0	0	1.55158	2.24764	1.20719	0	2.11372	7.50996
FBgn0033502	CG12910	protein_coding	2R	3.19319	0	8.67348	5.14373	0.74485	0	0	0	2.47278	1.22755	1.43215	0	0	0	1.58348	0	0	0	0	0	1.7763	11.4826	8.51703	3.35436	1.39386	0	0	0	2.12798	0	3.49871	0.944461	2.27798	1.34874	1.13324	0	0	0	0	0	0	3.93337	12.0719	0	2.8183	0.577689
FBti0020309		transposable_element	3R	0	1.53897	1.44558	0	0	0	0	0	0	0.613776	0	0	0	0	0	0	0.667438	0	0	0	0.888152	0	2.12926	0	0	0	0	0	1.06399	0	0	0	0	0	0	0	0	0	0	0	0.775791	0	0	0	0	0
FBgn0051028	CG31028	protein_coding	3R	1.0644	1.53897	2.89116	0	2.23455	1.59532	1.56808	3.38705	0.618195	0	0	0	0	1.21752	0	0	0.667438	0	0	0	0	0	0	1.67718	0	1.94272	3.52944	0	2.12798	0	1.16624	0	0.569496	0	1.13324	0	0	0	0	0	0	0.56191	0	0	2.8183	0
FBgn0033673	CG8298	protein_coding	2R	5.32199	6.15588	1.44558	6.00102	5.21395	6.7801	5.48828	4.06446	8.03654	7.36531	9.30895	7.5598	9.71109	9.74015	6.33393	5.8869	5.3395	7.27999	5.72981	2.77906	4.44076	2.55168	2.12926	3.35436	0	1.94272	1.76472	3.06359	8.51192	5.02735	3.49871	15.1114	9.68142	5.39495	2.26648	9.10508	6.61359	3.17341	1.59918	0	4.65475	11.8001	0	2.74466	2.11372	2.88845
FBgn0024293	Spn43Ab	protein_coding	2R	0	0	0	0.857289	0	0	0	0	0	0	0	0.944975	10.7901	2.43504	6.33393	7.84919	56.7322	70.3732	104.282	86.1508	0	0	0	1.67718	0	0	0	0	0	0	2.33247	0.944461	7.40344	15.5105	3.39972	6.50363	4.96019	14.8093	4.79755	110.311	0	0	0	0	0.704574	0
FBgn0266598	Kmn2	protein_coding	3R	0	0	0	0	0.74485	0	0	0	0	0	0	0.944975	0	0	0	0	0	0	0	0	0	0	0	0	0	0	0	0	0	1.67578	0	0	0	0	0	0	0	0	0	0	0	0	0	0	0	0
FBgn0036030	Prps	protein_coding	3L	69.1858	55.4029	37.5851	48.8655	49.1601	61.0209	82.3241	52.838	190.404	185.36	149.659	149.306	107.901	84.0088	80.7577	102.04	270.312	375.324	269.301	330.708	13.3223	7.65504	21.2926	18.449	20.9078	24.284	29.1179	40.8479	69.1594	56.9766	62.9768	50.0565	48.4071	40.4622	24.9312	26.0145	41.3349	124.821	46.3763	212.55	26.3769	21.3526	15.6935	23.3296	38.7516	41.0159
FBgn0036299	Tsf2	protein_coding	3L	2.12879	6.15588	2.89116	6.85831	40.9667	28.7157	31.3616	25.0642	0.618195	0	1.43215	1.88995	1.07901	2.43504	0	3.9246	0.667438	1.61777	0	4.16859	3.55261	6.3792	2.12926	3.35436	5.57542	2.91408	7.94124	2.04239	1.06399	0	4.66495	0	1.13899	3.37185	1.13324	1.30073	3.3068	1.0578	0	0	6.98212	3.93337	8.45036	4.11698	23.2509	10.3984
FBgn0037424	Osi15	protein_coding	3R	0	0	0	0.857289	2.23455	0.39883	0	1.35482	0	0	0	0	438.078	265.419	292.944	1049.83	0	0	0	0	0	1.27584	4.25852	1.67718	0	0	0	0	0	0	0	0	91.1193	217.147	100.858	83.2464	0	0	0	0	0	0	0	0	0	2.31076
FBgn0030645	Alg14	protein_coding	X	1.0644	1.53897	0	0	1.4897	1.19649	0	4.06446	0.618195	0	0.716073	0.944975	0	0	1.58348	0	0	0	0	2.77906	0	1.27584	2.12926	0	1.39386	0.971359	0	2.04239	1.06399	1.67578	0	0.944461	0	1.34874	0	0	0	0	1.59918	0	0.775791	0.56191	2.41439	0	1.40915	1.73307
FBgn0031876	Atac1	protein_coding	2L	0	1.53897	2.89116	0	1.4897	0.39883	0.784039	1.35482	0.618195	0.613776	1.43215	0	0	0	0	0	2.66975	0.808887	1.14596	0	0.888152	1.27584	6.38777	0	1.39386	1.94272	3.52944	5.10599	1.06399	0	1.16624	0.944461	1.13899	0	1.13324	0	0	1.0578	0	0	0	0.56191	0	0	0	2.88845
FBgn0035855	CG7366	protein_coding	3L	0	0	0	0	0	0	0	0	0	0	0.716073	0	0	0	0	0	0	0	0	0	0	0	0	0	0	0	0	0	0	0	0	0	0	0	0	0	0	0	0	0	0	0	0	0	0	0
FBgn0262560	wcd	protein_coding	2R	0	0	0	0.857289	0.74485	3.58947	6.27232	2.70964	16.6913	14.7306	15.0375	3.7799	1.07901	2.43504	0	0	0	0.808887	1.14596	0	0	0	0	0	1.39386	0.971359	1.76472	2.04239	9.57591	8.37891	4.66495	14.1669	1.70849	3.37185	1.13324	0	0	0	0	2.6905	0	1.12382	2.41439	1.37233	0	5.1992
FBgn0052675	Tango5	protein_coding	X	2.12879	21.5456	5.78232	10.2875	7.4485	9.17308	14.1127	8.80634	9.27293	9.82041	4.29644	4.72487	7.55307	4.87007	1.58348	3.9246	56.7322	37.2088	17.1894	34.7382	4.44076	3.82752	2.12926	0	1.39386	5.82815	7.05888	7.14838	2.12798	5.02735	4.66495	1.88892	0.569496	4.72059	2.26648	3.90218	36.3748	40.1966	20.7894	37.667	4.65475	2.80955	4.82878	9.6063	9.15946	6.35458
FBgn0267488	Mcr	protein_coding	2L	1.0644	16.9287	2.89116	6.85831	13.4073	18.745	13.3287	20.3223	4.94556	4.29643	2.86429	3.7799	1.07901	1.21752	0	0	1.33488	1.61777	0	1.38953	14.2104	14.0342	29.8096	1.67718	5.57542	10.6849	4.4118	6.12718	4.25596	8.37891	3.49871	3.77785	2.84748	2.02311	3.39972	3.90218	0	1.0578	1.59918	0	7.75791	3.37146	2.41439	4.11698	12.6823	6.35458
FBgn0035016	CG4612	protein_coding	2R	15.966	30.7794	23.1293	20.5749	67.7813	70.194	61.1551	73.8378	48.2192	34.9852	50.8412	46.3038	26.9753	24.3504	26.9192	21.5853	22.0255	19.4133	28.649	20.8429	46.1839	17.8618	21.2926	13.4174	51.5726	83.5369	90.0007	55.1447	44.6876	63.6797	41.9845	28.3338	36.4477	28.9979	35.1304	20.8116	26.4544	38.081	38.3804	24.2145	41.8927	21.3526	21.7295	39.7975	52.1385	74.5219
FBgn0032262	CG7384	protein_coding	2L	0	0	0	0	0	0	0	0	0	0	0	0	0	0	0	0	0	2.42666	3.43788	2.77906	0	0	0	0	0	0	0	0	0	0	0	0	0	0	0	0	0	1.0578	0	0	0	0	0	0	0	0
FBgn0267304	lncRNA:CR45740	ncRNA	3L	0	0	0	0.857289	0	0.39883	0	0	0	0	0	0.944975	0	0	0	0	0	0	0	0	0	0	0	0	0	0	0	3.06359	0	0	0	0	0	0	0	1.30073	0	0	0	0	0.775791	0.56191	0	0	0	0
FBgn0035555	CG13720	protein_coding	3L	0	0	0	0	0	0	0	0	3.09098	0	0.716073	0	0	0	0	0	0	0	0	0	0	0	0	0	0	0	0	0	0	0	0	0	0	0	1.13324	0	1.6534	0	3.19837	0	0	0	0	4.11698	0	0
FBgn0039277	Nepl16	protein_coding	3R	0	0	1.44558	0	0	0	0	0	0	0	0	0	0	0	0	0	0.667438	0	0	1.38953	0.888152	0	0	0	0	0	0	0	0	0	0	0	0	0	0	0	0	0	0	0	0.775791	0.56191	0	0	0	0
FBgn0039302	Nup358	protein_coding	3R	4.25759	3.07794	11.5646	6.85831	7.4485	6.38127	5.48828	13.5482	7.41834	12.8893	10.7411	5.66985	5.39505	6.08759	4.75045	0	22.6929	19.4133	26.3571	23.622	12.4341	7.65504	4.25852	16.7718	11.1508	8.74223	8.8236	9.19078	13.8319	30.1641	19.826	12.278	9.68142	4.04622	4.53295	7.80435	51.2553	31.7341	30.3845	21.524	8.5337	10.6763	2.41439	5.48931	4.22744	6.93227
FBgn0031837	DIP-iota	protein_coding	2L	2.12879	0	0	0	0	0	0	0	0	0	0	0	0	0	0	0	0	0	0	0	0	0	0	0	0	0	0	0	0	0	0	0	0	0.674369	0	0	0	0	1.59918	0	0	0.56191	0	0	0	0
FBgn0033404	Or45a	protein_coding	2R	0	0	0	0	0	0.39883	0	0	0	0	0	0	0	0	0	0	0	0	0	0	0	0	0	0	0	0	0	0	0	0	0	0	0	0	0	0	0	0	0	0	0	0	0	0	0	0
FBgn0037199	EMC4	protein_coding	3L	3.19319	0	1.44558	4.28645	5.9588	3.19064	0.784039	2.03223	1.85459	4.29643	3.58036	1.88995	7.55307	3.65256	7.91742	11.7738	4.67207	2.42666	1.14596	11.1162	0	0	0	1.67718	1.39386	1.94272	0.88236	3.06359	2.12798	0	4.66495	5.66677	8.54243	7.41806	6.79943	6.50363	1.6534	2.11561	1.59918	2.6905	3.87895	1.12382	3.62158	1.37233	2.8183	2.31076
FBti0020113		transposable_element	3L	0	0	0	0	0	0	0	0	0	0	0	0	0	0	0	0	0	0	0	0	0	0	0	0	0	0	0	0	0	0	0	0	0	0	0	0	0	0	0	0	0.775791	0	0	0	0	0
FBgn0051755	SoYb	protein_coding	2L	0	0	0	0	0	0.39883	0	0	0	0	0	0.944975	0	0	0	1.9623	0	0.808887	0	0	0	0	0	0	2.78771	0.971359	0.88236	0	0	0	0	0	0	0	0	0	0	0	0	0	0	0	0	0	0	0
FBgn0039461	CG5500	protein_coding	3R	12.7728	6.15588	15.9014	5.14373	1.4897	3.9883	3.9202	4.06446	6.80015	2.4551	4.29644	3.7799	7.55307	19.4803	17.4183	17.6607	6.00694	7.27999	8.02173	9.7267	3.55261	5.10336	8.51703	5.03154	1.39386	0.971359	4.4118	4.08479	5.31995	10.0547	4.66495	3.77785	6.26445	8.09243	9.06591	3.90218	9.92039	2.11561	11.1943	2.6905	4.65475	9.55248	7.24316	8.23397	11.9778	4.04383
FBgn0030542	CG12481	protein_coding	X	0	1.53897	0	0	0	0	0	0	0	0	0	0	0	0	0	0	0	0	0	0	0.888152	0	0	0	0	0	0	0	0	0	0	0	0	0	0	0	0	0	0	0	0	0	1.20719	0	0	1.15538
FBgn0037894	Ranbp9	protein_coding	3R	2.12879	10.7728	1.44558	6.00102	14.897	12.7625	10.1925	15.5804	43.8919	44.8056	35.0876	32.1291	5.39505	10.9577	11.0844	9.81149	7.34182	1.61777	2.29192	5.55812	1.7763	3.82752	0	3.35436	25.0894	12.6277	8.8236	10.212	18.0878	23.461	19.826	30.2228	11.9594	6.74369	5.66619	6.50363	0	2.11561	0	0	7.75791	5.6191	12.0719	10.9786	10.5686	10.3984
FBgn0034406	Jheh3	protein_coding	2R	0	0	0	0	0	0	0	0	0	0	0	0	0	0	0	0	0	0	0	0	0	0	0	0	0	0	0	0	0	0	0	0	0	0	0	0	0	0	0	0	0	0	1.20719	0	0	0
FBgn0029676	HIP-R	protein_coding	X	151.144	161.592	122.874	192.033	332.948	325.046	296.367	280.448	467.356	506.365	414.606	490.442	282.701	321.425	302.445	288.458	103.453	102.729	101.991	91.7089	139.44	146.722	191.633	115.725	429.307	408.942	366.18	312.486	273.446	341.86	297.39	366.451	350.24	374.275	420.431	369.406	112.431	87.7978	127.935	121.073	189.293	169.135	165.386	256.625	547.454	407.849
FBgn0031389	CG4259	protein_coding	2L	0	0	1.44558	0.857289	0.74485	0.797659	0	1.35482	1.23639	0	2.14822	0	5.39505	1.21752	3.16697	7.84919	1.33488	1.61777	2.29192	1.38953	0	0	2.12926	0	5.57542	4.85679	1.76472	5.10599	1.06399	0	6.99742	0.944461	0.569496	1.34874	4.53295	0	1.6534	4.23122	0	0	1.55158	0	0	2.74466	7.04574	4.04383
FBgn0031695	Cyp4ac3	protein_coding	2L	12.7728	0	0	0	0	0	0	0	0	0	0	0	1.07901	0	3.16697	3.9246	19.3557	8.89776	5.72981	13.8953	1.7763	20.4134	6.38777	48.6382	0	0	0	0	0	0	0	0	0	0	0	0	19.8408	11.6358	3.19837	5.381	0.775791	5.05719	1.20719	0	0	0
FBgn0261270	Sps1	protein_coding	2R	1.0644	4.61691	0	6.85831	6.70365	5.18478	7.05635	11.516	12.3639	12.8893	13.6054	7.5598	6.47406	4.87007	1.58348	0	7.34182	6.4711	4.58384	9.7267	3.55261	8.93088	4.25852	8.3859	4.18157	0.971359	3.52944	7.14838	12.7679	6.70313	11.6624	15.1114	10.2509	9.44117	12.4656	15.6087	11.5738	5.28902	4.79755	10.762	6.20633	5.05719	8.45036	2.74466	6.34117	2.88845
FBgn0050345	CG30345	protein_coding	2R	1.0644	3.07794	7.2279	2.57187	0	0.39883	0	0.677411	0	0	0	0	0	0	0	0	3.33719	4.04444	1.14596	1.38953	5.32891	1.27584	4.25852	5.03154	1.39386	0.971359	0	0	0	0	0	0	0	0	0	0	0	4.23122	3.19837	5.381	0	5.05719	1.20719	9.6063	0.704574	0.577689
FBti0061408		transposable_element	4	0	0	0	0	0	0	0	0	0	0	0	0	0	0	0	0	0	0	0	0	0	0	0	0	1.39386	0	0	1.0212	0	0	0	0	0	0	0	0	0	0	0	0	0	0	0	0	0	0
FBgn0030151	CG1354	protein_coding	X	93.667	41.5522	75.1702	42.8645	21.6006	17.5485	25.8733	15.5804	177.422	187.202	140.35	151.196	71.2147	63.311	93.4255	66.7181	15.3511	14.56	10.3137	11.1162	64.8351	82.9296	102.204	110.694	37.6341	40.7971	33.5297	30.6359	185.134	157.524	164.439	181.337	74.6039	82.2731	79.3267	71.5399	41.3349	33.8497	49.5747	16.143	103.18	153.963	153.314	109.786	58.4796	39.2829
FBgn0039799	CG15543	protein_coding	3R	0	0	0	0	0	0	0	0	0	0	0	0	0	0	0	0	0	0	0	0	0	0	0	0	0	0	0	0	0	0	0	0	0	0	0	0	0	0	0	0	0	0	0	0	0	0
FBgn0035257	CG12011	protein_coding	3L	0	0	0	0	0.74485	0	0	1.35482	0	0	0	0	0	0	0	0	0	0	0	0	0	0	0	0	1.39386	0	0	0	0	0	0	0	0	0	0	0	0	0	0	0	0	0	0	0	0	0
FBgn0039817	CG15553	protein_coding	3R	0	0	0	0.857289	0	0	0	0	0	0	0	0	0	0	0	0	0	0.808887	0	0	0	0	0	0	0	0	0	0	0	0	0	0	0	0	0	0	1.6534	1.0578	0	0	0	0	0	0	0	0
FBgn0051224	CG31224	protein_coding	3R	6.38638	32.3183	13.0102	17.1458	11.9176	15.5544	17.2489	12.1934	9.27293	10.4342	8.59287	6.61482	7.55307	6.08759	19.0018	7.84919	8.00926	15.3689	21.7733	6.94764	31.9735	16.5859	10.6463	8.3859	15.3324	16.5131	8.8236	11.2332	6.38394	8.37891	4.66495	4.72231	10.2509	8.7668	9.06591	5.2029	47.9485	22.2139	43.178	21.524	31.8074	11.2382	8.45036	28.8189	7.75031	8.66534
FBgn0054008	CG34008	protein_coding	3R	0	0	0	0	0.74485	0.39883	0.784039	0.677411	0	0	0	0.944975	0	0	0	0	0	0	0	0	0.888152	0	0	0	1.39386	0	0	2.04239	1.06399	1.67578	0	0	0	0	1.13324	0	0	0	0	0	0	0	0	0	0.704574	1.73307
FBti0062310		transposable_element	2R	0	0	0	0	0	0	0	0	0	0	0	0	0	0	0	0	0	0	0	0	0	0	0	0	0	0	0.88236	0	0	0	0	0	0	0	0	0	0	0	0	0	0	0	0	0	0	0
FBgn0267915	lncRNA:CR46196	ncRNA	2L	0	0	0	0	0	0	0	0	0	0	0	0	0	0	0	0	0	0	0	0	0	0	0	0	0	0	0	0	0	0	0	0	0	0	0	0	0	0	0	0	0	0	0	0	0	0
FBti0062658		transposable_element	4	0	0	0	0	0	0	0	0	0	0	0	0	0	0	0	0	0	0	0	0	0	0	0	0	0	0	0	0	0	0	0	0	0	0	0	0	0	0	0	0	0	0.56191	0	0	0	0
FBgn0013276	Hsp70Ab	protein_coding	3R	0	0	0	0	0	0	0	0	0	0.613776	0	0.944975	0	0	0	0	0	0	1.14596	0	0	0	0	0	0	0	0	0	0	0	0	0	0	0	0	0	0	0	0	0	0	0	0	0	0	0
FBgn0039714	Zip99C	protein_coding	3R	1.0644	1.53897	1.44558	2.57187	2.23455	1.59532	3.13616	4.06446	0	0.613776	0.716073	0.944975	0	0	1.58348	0	10.0116	4.04444	2.29192	1.38953	2.66446	0	2.12926	3.35436	0	0.971359	1.76472	1.0212	1.06399	1.67578	0	0	0	0	0	0	1.6534	2.11561	6.39673	2.6905	1.55158	1.68573	2.41439	1.37233	0.704574	2.31076
FBgn0037832	Desi	protein_coding	3R	0	1.53897	0	0	0	0	0	0	0	0	0	0	0	0	0	0	0.667438	0	2.29192	2.77906	0.888152	8.93088	2.12926	10.0631	0	0	0.88236	0	0	0	2.33247	0.944461	3.41697	1.34874	2.26648	3.90218	6.61359	1.0578	4.79755	0	0.775791	1.12382	0	0	0	0
FBgn0054054	CG34054	protein_coding	2R	0	0	0	0	0	0	0	0	0	0	0	0	0	0	0	3.9246	3.33719	1.61777	1.14596	2.77906	0	0	0	0	0	0	0	0	0	0	0	0	0	0.674369	0	1.30073	0	0	0	0	0	0	0	0	0	0
FBgn0020503	CLIP-190	protein_coding	2L	26.6099	7.69484	15.9014	14.5739	12.6624	11.5661	11.7606	10.1612	24.7278	34.3714	17.9018	39.6889	26.9753	48.7007	31.6697	29.4345	62.0717	86.5509	53.8602	65.3079	7.10522	25.5168	14.9048	13.4174	6.96928	6.79951	8.8236	12.2544	20.2158	31.8399	16.3273	14.1669	21.6408	20.9054	18.1318	18.2102	51.2553	47.6012	78.36	59.191	6.20633	11.2382	7.24316	9.6063	14.0915	6.35458
FBgn0033020	COX4L	protein_coding	2R	0	0	0	0	0	0	0	0	0	0	0	0	0	0	0	0	0	0	0	0	0	0	0	0	0	0	0	0	0	0	0	0.944461	0	0	0	0	0	0	0	0	0	0	0	0	0	0
FBgn0033355	CG13748	protein_coding	2R	0	0	0	0	5.21395	1.19649	6.27232	2.70964	15.4549	3.68265	2.86429	0.944975	0	0	0	1.9623	2.66975	0	0	0	0	0	0	0	12.5447	5.82815	9.70596	4.08479	1.06399	1.67578	3.49871	0.944461	0.569496	0	0	0	0	0	0	0	0	0	0	2.74466	0.704574	2.31076
FBgn0265728	lncRNA:CR44535	ncRNA	3L	0	0	0	0	0	0	0	0	0	0	0	0	0	0	0	0	0	0	0	0	0	0	0	0	0	0	0	0	0	0	0	0	0	0	0	0	0	0	0	0	0	0	0	0	0	0
FBgn0267627	lncRNA:CR45965	ncRNA	3L	0	0	0	0	0.74485	0	0	0.677411	0	0	0	0	0	0	0	0	0	0	0	0	0	0	0	0	0	0	0	0	0	1.67578	0	0	0	0	0	0	0	0	0	0	0	0	0	0	0	0
FBgn0003977	vir	protein_coding	2R	1.0644	1.53897	2.89116	0	1.4897	5.18478	2.35212	4.06446	1.85459	3.68265	2.86429	0.944975	3.23703	1.21752	0	1.9623	3.33719	0.808887	2.29192	0	5.32891	2.55168	0	0	1.39386	1.94272	0.88236	4.08479	0	0	1.16624	1.88892	1.13899	0.674369	0	1.30073	1.6534	2.11561	1.59918	0	3.10316	1.12382	2.41439	0	1.40915	2.88845
FBgn0037802	Sirt6	protein_coding	3R	0	0	0	0	0	0	1.56808	0	0.618195	0	0.716073	0	0	0	0	0	0	0	0	0	0	0	0	0	0	0	0.88236	0	0	1.67578	0	0	0	0	0	0	0	0	0	0	0	0	0	0	0	0
FBgn0023550	FarO	protein_coding	X	0	0	0	0	0	0	0	0	0	0	0	0	0	0	0	0	0	0	0	0	0	0	0	1.67718	1.39386	0	0	0	0	0	0	0	0.569496	0	1.13324	0	0	0	0	0	0	0.56191	0	0	0	0.577689
FBgn0053263	CG33263	protein_coding	3L	0	0	0	0	0	0	0	0	0	0	0	0	0	0	0	0	0	0	0	0	0	0	0	0	0	0	0	0	0	0	0	0.944461	0	0	0	0	0	0	0	0	0	0	0	0	0	0
FBti0062181		transposable_element	2L	0	0	0	0	0	0	0	0	0	0	0	0	0	0	0	0	0.667438	0	0	0	0	0	0	0	0	0	0	0	0	0	0	0	0	0.674369	0	0	0	0	0	0	0	0	0	0	0	0
FBgn0053642	CG33642	protein_coding	2L	0	0	0	0	0	0	0	0	0	0	0	0	0	0	0	0	0	0	0	0	0	0	0	0	0	0	0	0	0	0	0	0	0	0	0	0	0	0	0	0	0	0	0	0	0	0
FBgn0010263	Rbp9	protein_coding	2L	324.641	150.819	268.878	275.19	40.9667	25.1263	28.2254	29.1287	148.367	166.947	132.473	128.517	206.091	191.15	150.431	125.587	8.00926	16.1777	32.0869	5.55812	239.801	302.374	227.831	348.853	30.6648	32.0548	38.8239	40.8479	160.663	207.797	150.445	164.336	267.663	258.283	240.247	222.424	23.1476	14.8093	38.3804	24.2145	248.253	466.386	290.934	267.604	58.4796	58.3466
FBgn0032285	CG17108	protein_coding	2L	0	0	0	0.857289	1.4897	0.797659	0	0	0	0	0	0.944975	1.07901	1.21752	4.75045	5.8869	98.1134	152.071	260.133	277.906	0	0	0	1.67718	1.39386	0.971359	3.52944	0	0	0	0	2.83338	0.569496	2.02311	0	1.30073	9.92039	32.7919	6.39673	357.837	0	0	0	0	3.52287	1.73307
FBgn0035144	Kah	protein_coding	3L	9.57958	73.8705	50.5953	50.5801	143.756	143.579	160.728	157.837	42.0373	38.0541	55.1376	61.4234	4.31604	4.87007	4.75045	5.8869	134.822	139.129	135.223	120.889	69.2759	12.7584	40.4559	16.7718	98.9637	112.678	102.354	154.201	17.0238	10.0547	18.6598	20.7782	2.27798	3.37185	4.53295	2.60145	190.141	144.919	121.538	78.0246	76.0275	26.9717	24.1439	63.1271	137.392	142.112
FBgn0030257	SmydA-4	protein_coding	X	6.38638	0	8.67348	1.71458	0	0.39883	0	0	4.32737	3.06888	5.72858	8.50477	17.2642	15.8277	12.6679	21.5853	1.33488	2.42666	2.29192	1.38953	0.888152	10.2067	4.25852	13.4174	0	0	0	0	18.0878	10.0547	15.1611	12.278	31.8917	25.626	38.5301	36.4203	1.6534	4.23122	1.59918	2.6905	0.775791	1.12382	4.82878	1.37233	0	0.577689
FBgn0000157	Dll	protein_coding	2R	0	0	0	0	0	0	0	0	0	0	0	0	0	0	0	0	0	0	0	0	0	0	0	1.67718	0	0	0	0	0	0	0	0	0	0	0	0	0	0	0	0	0	0	0	0	0	0
FBgn0035924	CG6576	protein_coding	3L	0	0	0	0	0	0	0	0	0	0	0	0	1.07901	0	0	0	0	0	0	0	0	0	0	0	0	0	0	1.0212	1.06399	0	0	0	0	0	0	0	0	0	0	0	0	0	0	0	0	0
FBgn0030830	CG5172	protein_coding	X	0	0	0	0	0	0	0	0	0	0	0	0	0	0	0	0	0	0.808887	0	0	0	0	0	0	0	0	0	0	0	0	0	0	0	0	0	0	0	0	0	0	0	0	0	0	0	0
FBgn0030174	CG15312	protein_coding	X	0	0	0	0	1.4897	0.797659	0.784039	0.677411	0.618195	1.84133	2.14822	0	1.07901	2.43504	1.58348	5.8869	0.667438	0	0	0	0	1.27584	0	1.67718	9.75699	0.971359	5.29416	1.0212	0	5.02735	1.16624	0	1.13899	0.674369	1.13324	0	0	0	0	2.6905	0.775791	0	0	0	0.704574	4.04383
FBgn0039328	CHKov2	protein_coding	3R	3.19319	3.07794	1.44558	4.28645	0.74485	0.797659	0.784039	1.35482	1.23639	0	2.14822	0	1.07901	1.21752	0	0	4.67207	4.04444	0	0	2.66446	0	4.25852	3.35436	0	2.91408	4.4118	3.06359	1.06399	0	2.33247	0.944461	0.569496	0.674369	3.39972	0	1.6534	0	0	0	0.775791	4.49528	3.62158	0	3.52287	4.04383
FBgn0036850	Gem2	protein_coding	3L	0	0	0	0	2.23455	0	0	3.38705	0	0.613776	0	0	0	0	1.58348	0	0	0	1.14596	1.38953	0	0	0	0	2.78771	0	2.64708	4.08479	2.12798	3.35157	1.16624	0.944461	0.569496	0	2.26648	1.30073	1.6534	0	0	0	0.775791	0.56191	0	0	2.8183	2.88845
FBgn0262732	mbf1	protein_coding	3L	8.51518	1.53897	4.33674	6.85831	25.3249	20.3403	23.5212	29.1287	69.8561	68.7429	60.1501	60.4784	67.9776	57.2234	53.8384	68.6804	12.6813	3.23555	6.87577	13.8953	5.32891	5.10336	6.38777	6.70872	18.1201	20.3985	26.4708	13.2756	95.7591	107.25	82.8028	91.6128	81.4379	90.3655	79.3267	93.6522	9.92039	5.28902	7.99592	13.4525	0	8.42866	12.0719	5.48931	24.6601	25.4183
FBti0059674		transposable_element	X	0	0	0	0	0	0	0	0	0	0	0	0	0	0	0	0	0	0	0	0	0	0	0	0	0	0	0	0	0	0	0	0	0	0	0	0	0	0	0	0	0	0	0	0	0	0
FBgn0031089	CG9572	protein_coding	X	110.697	124.656	140.221	286.335	306.878	324.647	216.395	249.965	0	0.613776	0	0.944975	0	0	3.16697	0	13.3488	7.27999	16.0435	8.33717	37.3024	110.998	89.4288	51.9926	105.933	83.5369	112.942	35.7419	3.19197	0	1.16624	2.83338	0	0	1.13324	0	24.801	6.34683	47.9755	40.3575	10.8611	10.1144	54.3237	27.4466	106.391	58.9243
FBgn0285912	mah	protein_coding	3R	0	0	0	0	0	0	0	0	0	0	0	0	0	0	0	0	0	0	0	0	0	0	0	0	0	0	0	0	0	0	0	0	0	0	0	0	0	0	0	0	0	0	0	0	0	0
FBgn0051116	ClC-a	protein_coding	3R	4.25759	1.53897	1.44558	6.85831	0	1.59532	1.56808	1.35482	0.618195	0.613776	2.14822	1.88995	4.31604	7.30511	7.91742	3.9246	26.6975	26.6933	65.3198	27.7906	0.888152	10.2067	0	11.7403	0	0	0.88236	1.0212	5.31995	1.67578	9.32989	2.83338	10.8204	4.04622	11.3324	11.7065	54.5621	78.2775	79.9592	43.048	1.55158	1.12382	4.82878	0	0.704574	2.31076
FBgn0266672	Sec8	protein_coding	3R	18.0948	38.4742	14.4558	21.4322	17.1315	15.9532	16.4648	23.7094	11.1275	16.5719	15.7536	13.2296	14.0271	12.1752	12.6679	9.81149	12.6813	12.1333	14.8975	13.8953	35.5261	29.3443	31.9389	31.8664	19.514	19.4272	19.4119	15.318	5.31995	15.082	16.3273	13.2225	9.68142	12.1386	11.3324	15.6087	8.26699	14.8093	11.1943	8.07151	45.7717	20.7907	31.387	41.1698	17.6144	21.3745
FBgn0037292	plh	protein_coding	3R	0	0	0	0	0	0	0	0	0	0	0	0	0	0	0	0	8.67669	13.7511	14.8975	15.2848	0	0	0	0	0	0	0	0	0	0	0	0	0	0	0	0	14.8806	20.0983	12.7935	8.07151	0	0	0	0	0	0
FBti0062566		transposable_element	X	0	0	0	0	0	0	0	0	0	0	0	0	0	0	0	0	0	0	0	0	0	0	0	0	0	0	0	0	0	0	0	0	0	0	0	0	0	0	0	0	0	0	0	0	0	0
FBgn0027599	CG2790	protein_coding	2R	2.12879	0	0	4.28645	0.74485	3.19064	2.35212	3.38705	5.56376	1.84133	2.14822	2.83492	1.07901	1.21752	3.16697	0	1.33488	1.61777	0	0	0.888152	1.27584	4.25852	1.67718	4.18157	3.88544	1.76472	4.08479	11.7039	1.67578	3.49871	2.83338	1.13899	3.37185	1.13324	2.60145	0	0	0	2.6905	0	1.12382	6.03597	1.37233	4.22744	5.77689
FBgn0264911	CG44102	protein_coding	2R	0	0	0	0	0	0.39883	0	0	0.618195	0	0	0	1.07901	0	0	0	0	0	0	0	0	0	0	0	0	0	0	1.0212	0	1.67578	0	0	0.569496	0	1.13324	1.30073	0	0	0	0	0	0	0	0	0	0
FBgn0001170	H2.0	protein_coding	2L	0	0	0	0	0	0	0	0	0	0	0	0	0	0	0	0	0	0	0	0	0	0	0	0	0	0	0	0	0	0	0	0	0	0	0	0	0	0	0	0	0	0	0	0	0	0
FBgn0036235	CG6938	protein_coding	3L	0	0	0	0	0	0	0	0	0	0	0	0	0	0	0	0	0	0	0	0	0	0	0	0	0	0	0	0	0	0	0	0	0	0	0	0	0	0	0	0	0	0	0	0	0	0
FBgn0034543	galla-1	protein_coding	2R	3.19319	12.3118	10.1191	6.85831	3.72425	3.9883	5.48828	2.70964	4.32737	8.59286	5.01251	5.66985	6.47406	6.08759	6.33393	9.81149	8.67669	0.808887	1.14596	11.1162	28.4209	6.3792	23.4218	8.3859	5.57542	5.82815	5.29416	3.06359	10.6399	5.02735	13.9948	6.61123	14.2374	14.1618	11.3324	11.7065	3.3068	7.40463	6.39673	13.4525	17.0674	4.49528	9.65755	20.5849	3.52287	4.04383
FBgn0037117	CG11248	protein_coding	3L	1.0644	0	0	0.857289	0.74485	0.797659	0.784039	0	0.618195	0.613776	0.716073	0	0	0	0	0	1.33488	0	1.14596	1.38953	0	0	0	0	0	0	0	0	0	0	0	0	0	0	0	0	1.6534	2.11561	1.59918	2.6905	0	0	0	0	2.11372	0
FBgn0250830	CG12547	protein_coding	2R	10.644	1.53897	7.2279	5.14373	17.8764	14.3579	8.62443	12.8708	8.65473	8.59286	8.59287	5.66985	9.71109	15.8277	7.91742	11.7738	6.67438	5.66221	17.1894	2.77906	0.888152	7.65504	6.38777	3.35436	9.75699	4.85679	7.94124	12.2544	5.31995	20.1094	5.83118	4.72231	17.0849	10.1155	7.93267	2.60145	3.3068	10.578	12.7935	8.07151	3.10316	7.30483	4.82878	9.6063	10.5686	11.5538
FBgn0002735	E(spl)mgamma-HLH	protein_coding	3R	0	0	0	0	0	0	0.784039	0	0	0	0	0	0	0	0	0	0	0	0	0	0	0	0	0	1.39386	0	0	0	0	0	0	0	0	0.674369	0	0	0	0	0	0	0	0	0	0	0	0
FBgn0021795	Tapdelta	protein_coding	2R	19.1592	9.23381	8.67348	17.1458	23.0903	16.7508	18.0329	20.9997	26.5824	19.027	21.4822	31.1842	19.4222	10.9577	31.6697	56.9067	10.0116	19.4133	25.2111	22.2325	13.3223	10.2067	21.2926	8.3859	16.7263	13.599	18.5296	19.4028	41.4956	18.4336	26.8234	25.5005	29.6138	14.8361	21.5315	23.4131	4.96019	2.11561	3.19837	24.2145	11.6369	14.0478	16.9007	8.23397	23.2509	16.1753
FBgn0017550	Rga	protein_coding	3R	34.0607	61.5588	40.4762	66.8685	58.8431	66.2057	75.2678	65.0314	24.1096	33.1439	30.0751	22.6794	21.5802	17.0453	28.5027	29.4345	45.3858	38.0177	33.2329	38.9068	69.2759	25.5168	44.7144	33.5436	55.7542	81.5942	66.177	66.3778	25.5358	33.5157	24.491	28.3338	38.1562	20.9054	27.1977	16.9094	47.9485	48.659	47.9755	64.5721	75.2517	48.8862	30.1798	74.1057	81.7306	84.3427
FBgn0261439	SdhA	protein_coding	2R	348.058	66.1757	118.538	78.8706	23.0903	18.3462	17.2489	16.9353	240.478	273.744	198.352	217.344	571.875	564.929	568.471	398.347	37.3765	45.2977	59.59	50.023	35.5261	104.619	31.9389	182.813	19.514	12.6277	18.5296	18.3816	155.343	154.172	139.948	122.78	306.958	320.325	250.446	310.873	24.801	33.8497	67.1657	59.191	41.8927	62.372	88.1251	49.4038	19.0235	15.5976
FBti0062066		transposable_element	3R	0	0	0	0	0	0	0	0	0	0	0	0	0	0	0	0	0	0	0	0	0	0	0	0	0	0	0	0	0	0	0	0	0	0	0	0	0	0	0	0	0	0	0	0	0	0
FBti0059750		transposable_element	3R	0	0	0	0	0	0	0	0	0	0	0	0	0	0	0	0	0	0	0	0	0	0	0	0	0	0	0	0	0	0	0	0	0	0	0	0	0	0	0	0	0	0	0	0	0	0
FBgn0266594	lncRNA:CR45119	ncRNA	3L	0	0	0	0	0	0	0	0	0	0	0	0	0	0	0	0	0	0.808887	0	0	0	0	0	0	0	0	0	0	0	0	0	0	0	0	0	0	0	0	0	0	0	0	0	0	0	0
FBgn0052523	CG32523	protein_coding	X	0	0	0	0	0	0	0	0	0	0	0	0	0	0	0	0	0	0	0	0	0	0	0	0	0	0.971359	0	0	0	0	0	0	0	0	0	0	0	0	0	0	0	0	0	0	0	0
FBgn0025790	TBPH	protein_coding	2R	3.19319	4.61691	5.78232	4.28645	14.1521	5.58361	17.2489	7.45152	11.7457	4.29643	10.7411	8.50477	1.07901	2.43504	6.33393	5.8869	4.67207	3.23555	5.72981	6.94764	13.3223	7.65504	6.38777	0	15.3324	11.6563	15.8825	12.2544	6.38394	20.1094	15.1611	17.9448	13.6679	8.7668	6.79943	7.80435	9.92039	4.23122	1.59918	8.07151	13.9642	10.1144	8.45036	10.9786	9.86404	13.8645
FBgn0033777	CG17574	protein_coding	2R	4.25759	6.15588	8.67348	9.43018	8.19335	14.7567	14.8967	12.8708	6.18195	2.4551	5.72858	3.7799	4.31604	4.87007	1.58348	1.9623	10.0116	10.5155	6.87577	4.16859	11.546	8.93088	4.25852	6.70872	9.75699	7.77087	10.5883	9.19078	10.6399	5.02735	11.6624	8.50015	4.55596	4.72059	1.13324	1.30073	9.92039	11.6358	4.79755	8.07151	9.30949	7.86674	4.82878	5.48931	7.75031	13.8645
FBti0062911		transposable_element	2L	0	0	0	0	0.74485	0	0	0	0	0	0	0	0	0	0	0	0.667438	0	1.14596	0	0	0	0	0	0	0	0	0	0	0	0	0	0	0	0	0	0	0	0	0	0	0	0	0	0	0
FBgn0004872	piwi	protein_coding	2L	0	0	0	0	0	0	0	0	0	0	0.716073	0	0	0	0	0	0.667438	0	0	0	0	0	0	0	0	0	0	0	0	0	0	0	0	0	0	0	0	0	0	0	0.775791	0.56191	0	0	0	0
FBgn0037679	Aduk	protein_coding	3R	4.25759	23.0845	11.5646	18.8604	5.21395	5.98244	4.70424	8.80634	4.32737	0.613776	3.58036	0.944975	1.07901	0	0	3.9246	7.34182	4.85332	4.58384	6.94764	5.32891	3.82752	17.0341	6.70872	2.78771	3.88544	0.88236	0	1.06399	5.02735	2.33247	3.77785	0.569496	1.34874	1.13324	0	1.6534	9.52024	6.39673	0	5.43054	17.4192	9.65755	8.23397	2.11372	6.35458
FBgn0032513	CG6565	protein_coding	2L	4.25759	0	0	0	0	1.59532	1.56808	0	25.9642	25.7786	25.7786	27.4043	21.5802	17.0453	26.9192	11.7738	0.667438	5.66221	5.72981	0	0	1.27584	2.12926	0	0	0	0	3.06359	20.2158	10.0547	24.491	18.8892	6.26445	10.1155	12.4656	7.80435	0	4.23122	1.59918	8.07151	0	1.12382	2.41439	1.37233	0.704574	0.577689
FBgn0037837	CG14693	protein_coding	3R	0	0	0	0	0	0	0	0	0	0	0	0	0	0	0	0	0	0	0	0	0	0	0	0	0	0	0	0	0	0	0	0	0	0	0	0	0	0	1.59918	0	0	0	0	0	0	0
FBgn0033929	Tfb1	protein_coding	2R	4.25759	1.53897	4.33674	2.57187	10.4279	6.7801	3.9202	6.77411	6.18195	3.68265	2.86429	2.83492	1.07901	2.43504	0	0	5.3395	4.04444	2.29192	5.55812	10.6578	12.7584	14.9048	25.1577	18.1201	10.6849	6.17652	9.19078	8.51192	5.02735	13.9948	13.2225	1.70849	4.72059	5.66619	2.60145	6.61359	5.28902	7.99592	0	7.75791	23.0383	16.9007	15.0956	7.75031	12.7092
FBgn0040609	CG3348	protein_coding	3R	0	0	0	0.857289	0	0	0	0.677411	0	0	0	0	0	0	0	0	0	0	0	1.38953	0	1.27584	0	0	0	0	0	0	0	0	0	0	0	0	0	0	1.6534	0	0	0	0	0	0	1.37233	0	0
FBgn0263380	lncRNA:CR43432	ncRNA	3L	0	1.53897	0	0	21.6006	15.1555	27.4414	39.2898	1.23639	0	2.86429	0.944975	1.07901	0	1.58348	0	0	0	0	0	0	0	0	0	12.5447	27.1981	14.1178	16.3392	4.25596	1.67578	3.49871	3.77785	0	1.34874	2.26648	3.90218	0	0	1.59918	2.6905	0	0	0	1.37233	28.183	10.3984
FBti0020280		transposable_element	3L	0	0	0	0	0	0	0	0	0	0.613776	0	0	0	0	0	0	0	0	0	0	0	0	0	0	0	0	0	0	1.06399	0	0	0	0	0	0	0	0	0	1.59918	0	0.775791	0.56191	0	0	0	0
FBgn0028685	Rpt4	protein_coding	X	35.1251	106.189	88.1804	94.3018	60.3328	35.097	51.7466	77.9022	5.56376	7.36531	9.30895	15.1196	25.8962	25.5679	50.6715	33.3591	405.802	285.537	317.431	315.423	248.683	139.067	342.811	162.686	135.204	102.964	138.531	126.628	11.7039	18.4336	24.491	27.3894	77.4514	66.7626	80.4599	101.457	411.696	403.023	462.164	333.622	337.469	269.717	217.295	310.146	111.323	119.582
FBgn0033316	Gle1	protein_coding	2R	3.19319	1.53897	1.44558	2.57187	7.4485	2.79181	3.9202	2.70964	8.65473	4.29643	3.58036	5.66985	3.23703	2.43504	1.58348	1.9623	0	0.808887	1.14596	0	0.888152	1.27584	0	1.67718	1.39386	1.94272	1.76472	5.10599	4.25596	0	1.16624	2.83338	2.84748	2.02311	2.26648	3.90218	0	1.0578	0	0	0.775791	2.24764	3.62158	1.37233	1.40915	4.04383
FBti0018964		transposable_element	2R	0	0	0	0	0	0	0	0	0	0	0	0	0	0	0	0	0	0	0	0	0	0	0	0	0	0	0	0	0	0	0	0	0	1.34874	0	0	0	0	0	0	0.775791	0	0	0	0.704574	0
FBgn0287187	mRpS5	protein_coding	3L	2.12879	1.53897	0	1.71458	2.9794	0.39883	0.784039	0	3.09098	1.22755	1.43215	0	4.31604	2.43504	3.16697	3.9246	2.00231	3.23555	0	1.38953	0.888152	0	0	0	4.18157	1.94272	1.76472	1.0212	0	1.67578	1.16624	3.77785	2.84748	2.69748	2.26648	5.2029	3.3068	3.17341	3.19837	0	0	0.56191	0	1.37233	0.704574	0.577689
FBgn0038113	CG11668	protein_coding	3R	0	0	0	0	0	0	0	0	0	0	0	0	0	0	0	0	0	0	0	0	0	1.27584	0	0	0	0	0	0	0	0	0	0	0	0	0	0	0	0	0	0	0	0	0	0	0	0
FBgn0036104	CG6418	protein_coding	3L	10.644	4.61691	0	1.71458	11.9176	10.3696	12.5446	8.12893	8.65473	8.59286	12.1732	7.5598	4.31604	6.08759	12.6679	3.9246	3.33719	1.61777	2.29192	2.77906	0	1.27584	2.12926	1.67718	6.96928	7.77087	3.52944	6.12718	8.51192	3.35157	4.66495	3.77785	2.27798	2.69748	0	5.2029	3.3068	5.28902	1.59918	2.6905	2.32737	2.80955	2.41439	1.37233	9.15946	6.93227
FBgn0003997	hid	protein_coding	3L	1.0644	0	0	0	21.6006	35.097	36.8499	20.9997	4.94556	1.84133	6.44466	0	0	1.21752	0	1.9623	4.00463	0.808887	0	0	5.32891	0	0	0	18.1201	17.4845	15.0001	20.4239	6.38394	1.67578	3.49871	0.944461	0	0.674369	0	0	0	1.0578	0	0	2.32737	0	0	1.37233	14.0915	17.9084
FBgn0031239	CG17075	protein_coding	2L	0	0	1.44558	0	0	0	0	0	0	0.613776	0	0	0	0	0	0	0	0	0	0	0	0	0	0	0	0	0	0	0	0	0	0	0	0	0	0	0	0	0	0	0	0	0	0	0	0
FBgn0028903	CG13243	protein_coding	2L	0	0	0	0	0	0	0	0	0	0	0	0	0	0	0	0	0	0	0	0	0	0	0	0	0	0	0	0	0	0	0	0	0	0	0	0	0	0	0	0	0	0	0	0	0	0
FBgn0027587	CG7028	protein_coding	3L	4.25759	1.53897	2.89116	0.857289	3.72425	3.58947	3.13616	6.77411	11.1275	7.97908	5.72858	5.66985	4.31604	6.08759	3.16697	0	2.00231	0.808887	0	1.38953	1.7763	0	2.12926	1.67718	5.57542	1.94272	3.52944	1.0212	5.31995	0	2.33247	7.55569	3.41697	4.72059	2.26648	2.60145	3.3068	1.0578	3.19837	0	3.10316	1.68573	1.20719	0	4.93202	2.88845
FBti0018951		transposable_element	2R	0	0	0	0	0	0	0	0.677411	0	0	0	0	3.23703	2.43504	1.58348	3.9246	5.3395	3.23555	5.72981	2.77906	0	0	0	0	0	0	0	0	0	0	0	0	2.84748	1.34874	0	0	0	0	0	0	0	0	0	0	0	2.31076
FBgn0003741	tra	protein_coding	3L	1.0644	1.53897	1.44558	6.00102	5.9588	2.79181	3.13616	1.35482	3.70917	3.68265	0.716073	5.66985	3.23703	1.21752	0	0	8.00926	8.89776	5.72981	1.38953	0	3.82752	2.12926	3.35436	4.18157	4.85679	2.64708	3.06359	2.12798	1.67578	3.49871	0.944461	0.569496	3.37185	1.13324	1.30073	1.6534	1.0578	7.99592	2.6905	3.87895	1.12382	1.20719	1.37233	2.8183	3.46614
FBgn0014931	CG2678	protein_coding	3R	0	0	0	0	0	0.39883	0	1.35482	0	0.613776	0	0	0	0	0	0	0	1.61777	0	0	0	0	0	0	0	0	1.76472	0	0	0	0	0	0.569496	0.674369	0	0	0	1.0578	0	0	0	0	0	0	0	0
FBgn0001253	ImpE1	protein_coding	3L	1.0644	1.53897	0	0	0	2.39298	3.9202	0	0	0	0	0	1.07901	4.87007	3.16697	3.9246	0	0	0	0	0	1.27584	0	3.35436	0	0	0	1.0212	1.06399	0	0	0	0	0	0	1.30073	0	0	6.39673	2.6905	0	0	0	0	5.63659	9.82072
FBgn0036666	TSG101	protein_coding	3L	9.57958	24.6235	17.347	15.4312	8.93819	20.3403	26.6573	26.419	8.65473	3.68265	3.58036	3.7799	5.39505	10.9577	4.75045	7.84919	34.7068	29.9288	37.8167	27.7906	28.4209	12.7584	34.0681	31.8664	25.0894	23.3126	30.8826	27.5723	7.44793	11.7305	15.1611	13.2225	18.2239	12.813	11.3324	15.6087	46.2951	39.1388	35.182	26.905	21.7221	21.9145	12.0719	23.3296	27.4784	28.8845
FBgn0267408	AOX1	protein_coding	3R	1.0644	4.61691	1.44558	5.14373	0	0.39883	1.56808	0	0	0	0	0	0	0	0	0	21.358	9.70665	6.87577	20.8429	1.7763	2.55168	2.12926	10.0631	0	0	0	0	0	0	0	0	0	0	0	0	0	2.11561	0	2.6905	0	5.6191	4.82878	0	0	0
FBgn0250871	pot	protein_coding	X	24.4811	13.8507	7.2279	16.2885	40.9667	38.6865	21.9531	25.7416	0	0	0.716073	0	2.15802	1.21752	0	0	24.0278	18.6044	10.3137	20.8429	9.76967	16.5859	6.38777	6.70872	15.3324	6.79951	22.9414	7.14838	0	0	1.16624	0.944461	1.70849	0.674369	3.39972	1.30073	24.801	15.8671	15.9918	13.4525	5.43054	6.74292	4.82878	13.7233	15.5006	9.82072
FBti0060436		transposable_element	3L	0	0	0	0	0	0	0.784039	0	0	0	0	0	0	0	0	0	0	0	0	0	0	0	0	0	0	0	0	0	0	0	0	0	0.569496	0	0	0	0	0	0	0	0	0	0	1.37233	0	0
FBgn0263831	Gen	protein_coding	3L	0	0	0	0	2.9794	0.797659	3.13616	2.03223	0.618195	0	0	0	0	1.21752	0	0	0	0	0	0	0	0	0	0	4.18157	2.91408	1.76472	1.0212	0	0	0	0	0	0	0	0	0	0	0	0	0	0	0	0	2.11372	2.31076
FBgn0261445	sgl	protein_coding	3L	1.0644	27.7014	0	3.42916	15.6418	13.959	15.6808	13.5482	7.41834	3.68265	5.01251	5.66985	10.7901	6.08759	4.75045	5.8869	3.33719	7.27999	2.29192	5.55812	14.2104	0	8.51703	1.67718	16.7263	14.5704	5.29416	7.14838	1.06399	1.67578	6.99742	2.83338	0.569496	4.04622	1.13324	3.90218	3.3068	1.0578	0	5.381	11.6369	0.56191	1.20719	5.48931	3.52287	6.93227
FBgn0000181	bic	protein_coding	2R	485.365	321.644	332.483	300.051	134.818	174.687	150.536	127.353	630.559	632.803	622.983	614.234	577.271	616.064	612.808	700.541	228.264	255.608	273.885	251.505	424.537	452.923	476.954	523.28	232.774	182.615	189.707	148.074	809.697	841.243	917.828	885.905	526.214	583.329	516.757	619.145	456.338	373.405	401.395	395.504	486.421	492.795	642.227	413.071	287.466	296.355
FBgn0052195	CG32195	protein_coding	3L	0	1.53897	0	0	0	0	0	0	0	0	0	0	0	0	1.58348	0	0	0	0	0	0	0	0	0	0	0	0	0	0	0	1.16624	0	0	0	0	1.30073	1.6534	0	0	0	0	0	0	0	0	0
FBgn0038115	CG7966	protein_coding	3R	0	4.61691	2.89116	7.7156	1.4897	1.59532	0.784039	1.35482	1.85459	0	0.716073	0	1.07901	2.43504	1.58348	5.8869	4.00463	3.23555	6.87577	4.16859	3.55261	0	4.25852	3.35436	0	0	0.88236	0	1.06399	0	4.66495	1.88892	5.69496	4.04622	2.26648	3.90218	0	1.0578	1.59918	0	2.32737	1.68573	9.65755	1.37233	0	2.88845
FBgn0022960	vimar	protein_coding	2R	3.19319	6.15588	2.89116	3.42916	11.9176	13.959	10.9766	18.2901	8.03654	9.82041	5.72858	5.66985	2.15802	4.87007	1.58348	0	7.34182	8.08887	11.4596	9.7267	11.546	7.65504	2.12926	6.70872	16.7263	13.599	19.4119	12.2544	12.7679	13.4063	9.32989	7.55569	4.55596	6.06932	4.53295	2.60145	28.1078	5.28902	12.7935	13.4525	18.619	7.86674	4.82878	19.2126	9.15946	20.2191
FBgn0038745	CG4538	protein_coding	3R	20.2235	86.1823	62.1599	44.579	8.19335	9.17308	7.84039	8.80634	3.09098	3.06888	3.58036	5.66985	15.1061	19.4803	7.91742	3.9246	62.0717	44.4888	44.6925	68.0869	87.0389	31.896	42.5852	33.5436	13.9386	11.6563	2.64708	12.2544	7.44793	6.70313	8.16366	1.88892	10.2509	10.1155	5.66619	6.50363	54.5621	47.6012	35.182	40.3575	69.0454	49.4481	30.1798	56.2655	9.86404	16.753
FBti0020144		transposable_element	3L	0	0	0	0	0	0	0	0	0	0	0	0	0	0	0	0	0	0	0	0	0	0	0	0	0	0	0.88236	1.0212	0	0	0	0	0.569496	0	0	0	0	0	0	0	0	0	0	0	0	0
FBgn0267363	JYalpha	protein_coding	4	0	0	0	0	0	0	0	0	0	0	0	0	0	0	0	0	0	0	0	0	0	0	0	0	0	0	0	0	0	0	0	0	0	0	0	1.30073	0	0	0	0	0	0	0	0	0	0
FBgn0033401	Cog6	protein_coding	2R	0	1.53897	0	0.857289	1.4897	0.797659	0.784039	1.35482	0	0	2.14822	0.944975	0	1.21752	0	3.9246	1.33488	0	0	0	0.888152	0	0	1.67718	2.78771	1.94272	0.88236	0	1.06399	0	3.49871	0	0	0	0	0	0	0	3.19837	0	0.775791	1.12382	0	0	0	5.77689
FBgn0033761	CG8778	protein_coding	2R	3.19319	6.15588	1.44558	7.7156	4.4691	3.9883	7.84039	7.45152	51.3102	41.123	49.409	38.744	9.71109	10.9577	14.2514	29.4345	4.67207	5.66221	9.16769	2.77906	4.44076	16.5859	8.51703	16.7718	4.18157	3.88544	5.29416	4.08479	15.9599	15.082	18.6598	37.7785	6.83395	10.1155	9.06591	7.80435	0	0	1.59918	2.6905	3.87895	6.18101	15.6935	0	2.8183	7.50996
FBgn0038321	CG6218	protein_coding	3R	0	0	0	0	0.74485	0	0	0	0	0.613776	0	0	2.15802	0	0	1.9623	0	6.4711	0	0	0	0	0	0	0	0	0	0	0	1.67578	0	0	0	0.674369	2.26648	1.30073	0	1.0578	1.59918	2.6905	0	0	0	0	0.704574	0
FBgn0263594	lost	protein_coding	3R	221.395	76.9484	127.211	144.025	101.3	122.042	123.878	106.353	170.004	277.427	166.845	185.215	246.014	242.286	251.774	180.531	34.7068	48.5332	55.0061	22.2325	57.7299	107.171	61.7485	60.3785	58.5419	51.482	48.5298	50.0387	59.5835	67.0313	90.9665	89.7238	199.323	168.592	176.785	107.96	41.3349	37.0232	62.3682	34.9765	47.3232	61.2482	63.9813	43.9145	65.5254	62.3905
FBgn0083984	CG34148	protein_coding	3R	0	0	0	0	0	0.39883	0	0	0	0	0	0	0	0	0	0	0	0	0	0	0	0	0	0	0	0.971359	0	0	0	0	2.33247	0	1.70849	0.674369	2.26648	0	0	0	0	0	0	0.56191	0	0	0	1.15538
FBgn0026160	tna	protein_coding	3L	108.569	226.228	192.262	232.325	65.5468	65.0092	72.1316	93.4827	72.947	62.6051	52.2733	77.4879	50.7135	59.6584	34.8366	47.0952	22.0255	29.1199	33.2329	43.0754	277.992	156.928	289.579	135.852	135.204	137.933	177.354	122.544	63.8394	33.5157	38.4858	46.2786	30.7528	41.8109	26.0645	26.0145	14.8806	25.3873	12.7935	26.905	114.041	146.659	149.692	109.786	107.8	92.4303
FBgn0082940	snoRNA:Me28S-C3227a	snoRNA	2R	0	0	0	0	0	0	0	0	0	0	0	0	0	0	0	0	0	0	0	0	0	0	0	0	0	0	0	0	0	0	0	0	0	0	0	0	0	0	0	0	0	0	0	0	0	0
FBgn0015568	alpha-Est1	protein_coding	3R	1.0644	0	1.44558	0	0.74485	0.39883	0	2.03223	1.23639	0.613776	0	0	1.07901	3.65256	3.16697	5.8869	8.00926	3.23555	12.6056	12.5058	0	1.27584	2.12926	0	4.18157	0.971359	3.52944	2.04239	4.25596	1.67578	4.66495	0	3.98647	2.02311	5.66619	3.90218	1.6534	4.23122	0	16.143	0.775791	0	0	0	1.40915	6.35458
FBgn0267107	lncRNA:CR45547	ncRNA	3R	0	0	0	0	0	0	0	0.677411	0	0	0	0	0	0	0	0	0	0	0	0	0	0	0	0	0	0	0	0	0	0	0	0	0	0	0	0	0	0	0	0	0	0	0	0	0	0
FBgn0267759	lncRNA:CR46090	ncRNA	3R	0	0	0	0	0	0	0	0	0	0	0	0	0	0	0	0	0	0	0	0	0	0	0	0	0	0	0	0	0	0	0	0	0	0	0	0	0	0	0	0	0	0.56191	0	0	0	0
FBgn0038881	CG16791	protein_coding	3R	3.19319	9.23381	11.5646	12.8593	19.3661	20.7391	20.385	20.9997	21.0186	21.4822	21.4822	24.5693	5.39505	9.74015	7.91742	9.81149	5.3395	0.808887	4.58384	4.16859	6.21706	5.10336	4.25852	0	25.0894	25.2553	23.8237	24.5087	6.38394	8.37891	8.16366	4.72231	7.40344	12.813	9.06591	11.7065	8.26699	0	7.99592	5.381	18.619	15.1716	10.8647	20.5849	30.2967	21.9522
FBti0063191		transposable_element	3L	0	0	0	0	0	0	0	0	0	0	0	0	0	0	0	0	0	0	0	0	0	0	0	0	0	0	0	0	0	0	0	0	0	0	0	0	0	0	0	5.381	0	0	0	0	0	0
FBgn0032219	CG4995	protein_coding	2L	0	0	0	0	0	0	0.784039	0	0	0	0	0.944975	4.31604	2.43504	4.75045	7.84919	8.67669	11.3244	14.8975	9.7267	0	1.27584	0	0	0	0	0	0	0	0	1.16624	0	5.12546	5.39495	1.13324	2.60145	0	2.11561	0	5.381	0	0	0	0	0	0
FBgn0259139	glo	protein_coding	3R	12.7728	36.9353	21.6837	22.2895	32.0285	23.9298	25.8733	26.419	27.8188	24.551	17.9018	17.9545	17.2642	14.6102	12.6679	13.7361	13.3488	10.5155	5.72981	11.1162	19.5393	5.10336	8.51703	5.03154	16.7263	6.79951	14.1178	11.2332	9.57591	13.4063	12.8286	14.1669	8.54243	7.41806	4.53295	11.7065	14.8806	2.11561	19.1902	10.762	10.0853	8.42866	12.0719	9.6063	11.9778	11.5538
FBgn0022702	Cht2	protein_coding	3L	0	18.4676	2.89116	5.14373	7.4485	12.7625	17.2489	12.1934	0.618195	1.22755	0	0	0	0	0	0	9.34413	14.56	4.58384	8.33717	14.2104	3.82752	4.25852	3.35436	5.57542	3.88544	7.05888	1.0212	0	0	3.49871	0	0.569496	0	0	0	1.6534	8.46244	7.99592	2.6905	9.30949	2.24764	3.62158	5.48931	7.75031	5.1992
FBgn0030969	Usp39	protein_coding	X	1.0644	1.53897	1.44558	0.857289	5.21395	4.78595	3.13616	4.74187	4.94556	4.91021	5.72858	4.72487	3.23703	2.43504	1.58348	3.9246	2.00231	0	0	6.94764	0	0	2.12926	3.35436	6.96928	5.82815	13.2354	6.12718	6.38394	18.4336	4.66495	11.3335	2.84748	1.34874	1.13324	2.60145	0	0	1.59918	0	2.32737	3.93337	0	2.74466	7.75031	12.7092
FBgn0036485	FucTA	protein_coding	3L	0	0	0	0	0	0	0	0	0	0	0	0	0	0	0	0	0	0	0	0	0	0	0	0	0	0	0	0	0	0	0	0	0	0	0	0	0	0	0	0	0	0	0	0	0	0
FBgn0051849	CG31849	protein_coding	2L	1.0644	0	0	0.857289	0.74485	0.797659	0	1.35482	1.85459	5.52398	2.14822	1.88995	2.15802	1.21752	0	1.9623	0	0	0	0	1.7763	0	0	1.67718	0	0.971359	0	0	1.06399	1.67578	4.66495	3.77785	2.27798	2.02311	1.13324	2.60145	0	0	0	0	2.32737	0.56191	1.20719	0	0	0.577689
FBti0062337		transposable_element	2R	0	0	0	0	0.74485	0	0	0.677411	0	0	0	0	0	0	0	0	0	0	0	0	0	0	0	0	0	0	0	0	0	0	0	0	0	0	0	0	0	0	0	2.6905	0	0	0	0	0	0
FBgn0265345	lncRNA:CR44299	ncRNA	2R	1.0644	0	0	0	0.74485	0	0	0	0	0	0	0	0	0	0	0	0	0	2.29192	0	0	1.27584	0	1.67718	0	0	0	0	0	0	0	0	0	0	0	0	0	0	0	0	0	0	0	0	0	0
FBgn0035815	Snmp2	protein_coding	3L	0	0	0	2.57187	0	0	0	0.677411	0	0	0	0	0	0	0	0	0.667438	0	2.29192	0	0.888152	1.27584	0	1.67718	0	0	0	0	0	0	0	0	0	0	0	0	0	1.0578	0	0	0	0	0	0	0	0
FBgn0262739	AGO1	protein_coding	2R	87.2806	201.605	91.0715	90.8726	173.55	179.074	153.672	155.804	220.696	232.621	205.513	244.749	152.14	161.93	123.512	117.738	65.4089	76.8443	75.6334	77.8136	137.664	114.826	142.66	90.5677	142.173	103.935	119.119	119.48	148.959	192.715	131.785	140.725	117.886	130.153	164.32	114.464	105.817	98.3758	81.5584	61.8815	138.091	141.601	90.5395	190.754	143.029	108.606
FBgn0263379	lncRNA:CR43431	ncRNA	3L	0	0	0	0	0	0	0	0	0	0	0	0	0	0	0	0	0	0	0	0	0	0	0	0	0	0	0	0	0	0	0	0	0	0	0	0	0	0	0	0	0	0	0	0	0.704574	0
FBgn0033887	St4	protein_coding	2R	0	0	1.44558	0	0	0	0.784039	0	0	0	0	0	0	0	0	0	0	0	0	0	0.888152	0	0	0	0	0	0.88236	0	0	0	0	0	0	0.674369	0	0	3.3068	0	0	0	0.775791	0	0	1.37233	1.40915	0
FBgn0267159	lncRNA:CR45599	ncRNA	3R	0	0	0	0	0	0	0	0	0	0	0	0	0	0	0	0	0	0	0	0	0	0	0	0	0	0	0	0	0	0	0	0	0	0	0	0	0	0	0	0	0	0	0	0	0	0.577689
FBgn0005613	Sox15	protein_coding	2R	0	0	0	0	0	0	0	0	0	0	0	0	0	0	0	0	0	0	0	0	0	0	0	0	0	0	0	0	0	0	0	0	0	0	0	0	0	0	0	0	0	0	0	0	0	0
FBgn0011559	Acp36DE	protein_coding	2L	0	0	0	0	0	0	0	0	0	0	0	0	0	0	0	0	0	0	0	0	0	0	0	0	0	0	0.88236	0	0	0	0	0	0	0	0	0	0	0	0	0	0	0	0	0	0	0
FBti0020185		transposable_element	3L	0	0	0	0	0	0	0	0	0	0	0	0	0	0	0	0	0	0	0	0	0	0	0	0	0	0	0	0	0	0	0	0	0	0	0	0	0	0	0	0	0	0.56191	0	0	0	0
FBgn0029999	CG1575	protein_coding	X	0	0	0	0.857289	0	2.39298	0.784039	0.677411	2.47278	4.91021	3.58036	2.83492	0	0	0	0	0	1.61777	0	0	0	0	0	0	0	0	3.52944	0	2.12798	5.02735	4.66495	10.3891	2.27798	0.674369	1.13324	0	3.3068	0	0	0	1.55158	1.68573	1.20719	0	0	1.73307
FBgn0262112	sro	protein_coding	3R	0	1.53897	1.44558	2.57187	0	0	0.784039	0	0.618195	0.613776	0	0	0	0	0	0	0	0	0	0	0	1.27584	0	0	0	0.971359	0	0	1.06399	1.67578	0	0.944461	0	0	0	0	0	0	0	0	0.775791	1.68573	1.20719	0	0	0
FBgn0004419	me31B	protein_coding	2L	12.7728	32.3183	24.5749	27.4332	32.0285	38.6865	38.4179	42.6769	33.3825	31.3026	40.8162	19.8445	29.1333	21.9153	23.7523	23.5476	76.7554	91.4043	97.4067	72.2555	47.9602	21.6893	42.5852	18.449	29.271	34.9689	37.9415	35.7419	34.0477	30.1641	36.1533	28.3338	41.0037	43.834	48.7292	46.8261	82.6699	89.9134	54.3722	69.9531	39.5653	28.6574	21.7295	46.6592	31.0013	22.5299
FBgn0040732	CG16926	protein_coding	2R	1.0644	0	0	0	3.72425	2.39298	2.35212	1.35482	1.23639	0.613776	2.86429	0.944975	26.9753	20.6978	17.4183	29.4345	52.0602	80.0798	63.0279	66.6974	0	0	0	0	2.78771	2.91408	9.70596	1.0212	3.19197	1.67578	4.66495	0	13.0984	16.8592	21.5315	15.6087	3.3068	16.9249	1.59918	86.0961	0	0	0	1.37233	2.8183	3.46614
FBgn0265182	CG44247	protein_coding	2R	0	0	0	0	0	0	0	0	0	0.613776	0	0	0	0	0	0	0	0	0	0	0	2.55168	0	0	2.78771	0	0	0	0	0	0	0	0	0	0	0	0	0	1.59918	0	0	0	0	0	0	0
FBti0062737		transposable_element	3R	0	0	0	0	0	0	0	0	0	0	0	0	0	0	0	0	0	0	0	0	0	0	0	0	0	0	0	0	0	0	0	0	0	0	0	0	0	0	0	0	0	0	0	0	0	0
FBti0060988		transposable_element	3L	0	0	0	0	0	0	0	0	0	0	0	0	0	0	0	0	0	0	0	0	0	0	0	0	0	0.971359	0	0	0	0	0	0	0	0	0	0	0	0	0	0	0	0	0	0	0	0
FBti0019144		transposable_element	2L	0	0	0	0	0	0	0	0	0	0	0	0	0	0	0	0	0	0	0	0	0	0	0	0	0	0	0	0	0	0	0	0.944461	0	0	0	0	0	0	0	0	0	0	0	0	0	0
FBgn0039258	beta4GalT7	protein_coding	3R	0	0	0	0	0.74485	0.39883	0.784039	0.677411	1.23639	1.22755	1.43215	1.88995	0	1.21752	0	1.9623	0.667438	0	0	0	0.888152	1.27584	2.12926	0	4.18157	0	1.76472	1.0212	1.06399	1.67578	2.33247	0.944461	0.569496	2.02311	0	0	0	0	0	0	0	0	1.20719	1.37233	0.704574	1.15538
FBgn0030465	CG15743	protein_coding	X	1.0644	0	0	0.857289	1.4897	2.79181	0.784039	5.41929	6.80015	1.84133	1.43215	2.83492	1.07901	0	3.16697	1.9623	0	0.808887	2.29192	0	0.888152	1.27584	0	0	4.18157	1.94272	3.52944	2.04239	2.12798	3.35157	1.16624	1.88892	0	0.674369	1.13324	2.60145	0	0	3.19837	0	0	1.12382	1.20719	1.37233	4.22744	2.31076
FBgn0031320	CG5126	protein_coding	2L	0	0	0	0	0.74485	0.797659	0.784039	0	0	1.84133	0.716073	0	0	0	0	1.9623	0	0	0	0	0	0	0	0	0	0.971359	1.76472	1.0212	1.06399	1.67578	1.16624	0	0.569496	0	1.13324	0	0	0	0	0	0	0	0	0	1.40915	0.577689
FBgn0032100	CG13108	protein_coding	2L	0	0	0	0	0	0	0	0	0	0	0	0	0	1.21752	0	0	0	0	0	0	0.888152	0	0	1.67718	0	0	0	0	0	0	1.16624	0	0.569496	0.674369	0	0	0	0	1.59918	0	0	0	0	0	0.704574	0
FBgn0036992	Hpd	protein_coding	3L	0	0	0	0	0	0	0	0	0	0	0	0	0	0	0	0	3.33719	0	0	0	0	0	0	0	0	0	0	0	0	3.35157	0	0	0	0	0	0	0	1.0578	0	0	0	0	0	0	0	0.577689
FBgn0036446	CG9384	protein_coding	3L	3.19319	4.61691	4.33674	3.42916	5.21395	5.18478	3.13616	6.77411	10.5093	3.06888	4.29644	5.66985	2.15802	4.87007	11.0844	9.81149	2.00231	4.85332	4.58384	4.16859	10.6578	5.10336	0	5.03154	11.1508	6.79951	10.5883	13.2756	9.57591	18.4336	9.32989	5.66677	7.97294	12.1386	10.1991	3.90218	8.26699	9.52024	14.3927	0	2.32737	6.18101	1.20719	8.23397	6.34117	8.08765
FBgn0039415	CG6142	protein_coding	3R	0	0	0	0	0	0.797659	0	1.35482	0	0	0	0	0	0	0	0	0	0	1.14596	1.38953	0	0	0	0	1.39386	0.971359	1.76472	0	0	0	0	0	0	0	0	0	0	0	1.59918	0	0	0.56191	0	0	0	0
FBgn0039325	CG10560	protein_coding	3R	0	0	0	0	0	0	0	0	0	0	0	0	0	0	0	0	0	1.61777	2.29192	0	0	0	0	0	0	0	0	0	0	0	0	0	0	0	0	0	0	1.0578	0	0	0	0	0	0	0	0
FBgn0037102	CRIF	protein_coding	3L	4.25759	4.61691	4.33674	0.857289	3.72425	3.9883	6.27232	2.03223	11.7457	7.97908	10.025	12.2847	19.4222	19.4803	44.3375	35.3214	5.3395	7.27999	4.58384	5.55812	2.66446	0	4.25852	8.3859	1.39386	1.94272	3.52944	5.10599	5.31995	8.37891	12.8286	18.8892	25.6273	30.3466	22.6648	36.4203	0	3.17341	1.59918	8.07151	4.65475	5.6191	6.03597	1.37233	4.93202	5.1992
FBgn0260635	Diap1	protein_coding	3L	64.9282	135.429	91.0715	96.0164	67.0365	94.5226	82.3241	104.999	82.8382	78.5633	98.818	70.8731	22.6592	19.4803	22.1688	29.4345	26.6975	18.6044	17.1894	12.5058	114.572	48.4819	72.3948	55.3469	61.3296	102.964	103.236	88.8442	81.9273	87.1407	67.6417	91.6128	22.7798	28.9979	28.331	20.8116	11.5738	9.52024	7.99592	16.143	141.97	88.2199	65.1885	115.276	69.0483	80.2988
FBgn0035046	ND-19	protein_coding	2R	83.023	30.7794	37.5851	20.5749	8.93819	8.77425	7.84039	7.45152	46.3646	36.2128	32.9393	33.0741	157.536	169.235	202.686	176.607	19.3557	29.1199	43.5465	31.9592	11.546	12.7584	10.6463	46.961	18.1201	19.4272	8.8236	9.19078	26.5998	16.7578	32.6546	33.0561	95.1058	84.2962	90.6591	123.569	3.3068	6.34683	17.591	13.4525	3.87895	20.2288	25.3511	15.0956	11.2732	11.5538
FBgn0034840	CG3124	protein_coding	2R	0	0	0	0	0	0	0	0	0	0	0	0	0	0	0	0	0	0	0	0	0	0	0	0	0	0	0	0	0	0	0	0	0	0	0	0	0	0	0	0	0	0	0	0	0	0
FBgn0052707	APC4	protein_coding	X	0	1.53897	1.44558	0	1.4897	4.38712	2.35212	3.38705	1.85459	4.29643	2.14822	3.7799	1.07901	0	0	0	0	0	0	1.38953	0.888152	3.82752	2.12926	0	4.18157	0.971359	1.76472	3.06359	3.19197	1.67578	1.16624	4.72231	0	0	0	0	1.6534	0	0	0	0.775791	5.05719	3.62158	1.37233	0.704574	0.577689
FBgn0030503	Tango2	protein_coding	X	1.0644	6.15588	2.89116	4.28645	6.70365	7.97659	4.70424	7.45152	0.618195	1.84133	2.14822	2.83492	0	0	0	0	3.33719	4.04444	0	4.16859	7.99337	1.27584	6.38777	3.35436	9.75699	13.599	12.353	16.3392	0	1.67578	4.66495	1.88892	1.13899	2.69748	0	2.60145	3.3068	2.11561	4.79755	0	3.10316	3.37146	4.82878	1.37233	11.2732	16.753
FBgn0031734	CG11147	protein_coding	2L	1.0644	0	1.44558	1.71458	1.4897	0.39883	0	0	0	0.613776	0	0	2.15802	3.65256	4.75045	5.8869	2.00231	1.61777	0	5.55812	0.888152	0	0	0	1.39386	0	0	1.0212	0	0	2.33247	0.944461	2.27798	4.04622	0	0	0	0	0	0	0	0	0	0	0.704574	0.577689
FBgn0011205	fbl	protein_coding	3L	0	0	0	0	0.74485	0	0	0.677411	0	0	0	0	0	0	1.58348	1.9623	6.00694	2.42666	1.14596	1.38953	1.7763	3.82752	0	0	0	0	0.88236	2.04239	0	1.67578	0	0	0	0	1.13324	0	4.96019	8.46244	6.39673	2.6905	0	0	0	0	0.704574	0.577689
FBgn0035533	Cip4	protein_coding	3L	34.0607	6.15588	2.89116	8.57289	23.8352	25.1263	35.2818	25.0642	24.7278	31.3026	30.7911	31.1842	16.1852	6.08759	28.5027	25.5099	10.0116	10.5155	5.72981	1.38953	4.44076	7.65504	6.38777	5.03154	30.6648	20.3985	21.1766	24.5087	46.8156	48.5977	45.4832	59.5011	35.3087	31.6954	26.0645	28.616	16.534	13.7515	11.1943	8.07151	6.98212	6.18101	4.82878	8.23397	14.7961	11.5538
FBgn0030360	CG1806	protein_coding	X	0	0	0	0	2.23455	0.39883	0	0	0.618195	0	0	0	0	0	0	1.9623	2.66975	3.23555	5.72981	2.77906	0	0	0	0	0	0	0	0	0	0	1.16624	0	0	0	1.13324	0	0	1.0578	4.79755	2.6905	0	0.56191	0	0	0	0
FBgn0001233	Hsp83	protein_coding	3L	17.0304	38.4742	10.1191	33.4343	103.534	103.297	104.277	134.805	223.787	239.986	222.699	214.509	200.696	216.718	248.607	208.004	49.3904	69.5643	77.9254	44.4649	34.6379	26.7926	42.5852	16.7718	34.8464	35.9403	33.5297	40.8479	158.535	169.254	178.434	207.782	103.079	81.5987	72.5273	66.337	137.232	26.4451	28.7853	32.286	54.3054	24.1621	28.9727	48.0315	39.4561	37.5498
FBti0019345		transposable_element	3R	0	0	0	0	0	0	0	0	0	0	0	0	0	0	0	0	0	0	0	0	0	0	0	0	0	0	0	0	0	0	0	0	0	0	0	0	0	0	0	0	0	0	0	0	0	0
FBgn0040321	GNBP3	protein_coding	3L	1.0644	0	1.44558	2.57187	23.8352	20.3403	14.8967	23.7094	0.618195	0	0	0	5.39505	1.21752	1.58348	0	16.0185	8.89776	13.7515	15.2848	1.7763	3.82752	0	0	6.96928	3.88544	5.29416	1.0212	0	0	0	0	1.13899	0.674369	1.13324	2.60145	1.6534	4.23122	3.19837	10.762	2.32737	0.56191	0	1.37233	7.04574	6.35458
FBgn0028430	He	protein_coding	2L	0	0	0	0	0	0	0	0	0	0	0	0	0	0	1.58348	0	0	0	0	0	0	0	0	0	0	0	0	0	0	0	0	0	0	0	0	0	0	0	0	0	0	0	0	0	0	0
FBti0060304		transposable_element	2L	0	0	0	0	0	0	0	0	0.618195	0	0.716073	0.944975	0	1.21752	0	0	0	0	0	0	1.7763	0	0	0	0	0	0	0	1.06399	0	0	0	0	0.674369	0	0	0	0	0	0	0	0	0	0	0	0
FBgn0033483	egr	protein_coding	2R	0	0	0	0	5.21395	3.58947	2.35212	6.0967	0	0	0	0	3.23703	0	3.16697	1.9623	3.33719	0	3.43788	1.38953	0	0	2.12926	0	2.78771	1.94272	3.52944	4.08479	1.06399	0	2.33247	0	0	0	0	1.30073	14.8806	2.11561	22.3886	8.07151	1.55158	0	0	0	4.93202	6.93227
FBgn0003410	sina	protein_coding	3L	35.1251	26.1625	15.9014	18.8604	49.1601	32.3052	42.3381	30.4835	55.6376	44.8056	49.409	67.0932	61.5036	73.0511	55.4219	47.0952	24.6952	12.9422	12.6056	6.94764	15.0986	24.241	6.38777	21.8033	26.4833	27.1981	25.5884	22.4663	27.6637	43.5703	34.9871	47.2231	39.8647	55.9727	39.6633	49.4276	14.8806	20.0983	11.1943	16.143	10.8611	17.9811	30.1798	17.8403	25.3647	30.0398
FBgn0036689	CG7730	protein_coding	3L	0	0	0	0	0	0	0	0	0	0	0	0	0	0	0	0	0	0	0	0	0	0	0	0	0	0	0	0	0	3.35157	0	0	0	0	0	0	0	0	0	0	0	0	0	0	0	0
FBgn0015664	Dref	protein_coding	2L	17.0304	12.3118	10.1191	10.2875	19.3661	11.1672	15.6808	12.8708	21.0186	19.027	11.4572	7.5598	11.8691	13.3927	9.5009	5.8869	12.6813	7.27999	1.14596	2.77906	22.2038	14.0342	29.8096	11.7403	8.36313	9.71359	2.64708	4.08479	12.7679	8.37891	10.4961	15.1114	5.12546	10.7899	3.39972	6.50363	6.61359	2.11561	4.79755	2.6905	20.9464	24.1621	12.0719	16.4679	7.04574	10.3984
FBgn0002924	ncd	protein_coding	3R	0	0	0	0	0.74485	1.59532	0.784039	0.677411	0	0	0	0	0	0	0	0	0	0	0	0	0	0	0	1.67718	0	0.971359	0.88236	0	0	0	0	0	0	0	0	0	0	0	0	0	0	0	0	0	0	0.577689
FBgn0263765	lncRNA:CR43682	ncRNA	2L	0	0	0	0	0	0	0	0	0	0	0	0	0	0	0	0	0	0	0	0	0	0	0	0	0	0	0	0	0	0	0	0	0.569496	0	0	0	0	0	0	0	0	0	0	0	0	0
FBgn0035853	UbcE2M	protein_coding	3L	42.5759	26.1625	28.9116	36.0061	38.7322	42.6748	42.3381	38.6124	37.0917	31.9163	30.0751	43.4688	49.6345	41.3956	33.2532	37.2837	66.7438	59.0488	67.6117	91.7089	38.1905	21.6893	27.6804	33.5436	82.2375	108.792	81.1771	70.4626	21.2798	16.7578	25.6572	30.2228	21.0713	32.3697	29.4642	40.3225	49.6019	37.0232	51.1739	56.5005	34.9106	34.8384	32.5942	45.2868	88.0718	78.5658
FBgn0013773	Cyp6a22	protein_coding	2R	0	0	0	0	0	0	0	0	0	0	0	0	1.07901	1.21752	3.16697	3.9246	2.66975	4.85332	1.14596	2.77906	0	0	0	0	0	0	0.88236	1.0212	1.06399	0	0	0.944461	3.98647	0.674369	0	3.90218	1.6534	2.11561	0	0	0	0	0	0	0	0.577689
FBgn0011509	SrpRbeta	protein_coding	3L	8.51518	6.15588	11.5646	9.43018	11.9176	10.3696	10.1925	14.2256	15.4549	15.3444	14.3215	12.2847	8.63208	7.30511	14.2514	13.7361	10.679	19.4133	21.7733	18.0639	7.10522	8.93088	10.6463	1.67718	5.57542	4.85679	4.4118	6.12718	13.8319	16.7578	9.32989	4.72231	17.0849	8.7668	4.53295	11.7065	9.92039	9.52024	9.5951	10.762	10.8611	10.1144	2.41439	9.6063	15.5006	5.77689
FBgn0035251	Vta1	protein_coding	3L	9.57958	24.6235	20.2381	22.2895	22.3455	22.3345	15.6808	20.9997	8.03654	5.52398	12.8893	9.44975	1.07901	8.52263	4.75045	1.9623	25.3626	15.3689	13.7515	11.1162	28.4209	21.6893	31.9389	10.0631	36.2402	30.1121	29.1179	29.6147	11.7039	10.0547	8.16366	10.3891	7.40344	5.39495	3.39972	5.2029	11.5738	9.52024	4.79755	21.524	17.0674	21.3526	18.1079	17.8403	35.2287	21.9522
FBti0019086		transposable_element	X	0	0	0	0	0	0	0	0	0	0	0	0	0	0	0	0	0	0	0	0	0	0	0	0	0	0	0	0	0	0	0	0	0.569496	0	0	0	0	0	0	0	0	0	0	0	0	0
FBgn0000228	Bsg25D	protein_coding	2L	7.45078	3.07794	14.4558	18.0031	5.9588	7.97659	17.2489	10.1612	8.65473	4.91021	6.44466	6.61482	2.15802	2.43504	0	3.9246	21.358	12.1333	3.43788	22.2325	10.6578	6.3792	6.38777	16.7718	8.36313	4.85679	8.8236	0	3.19197	5.02735	3.49871	0.944461	6.26445	6.74369	4.53295	7.80435	16.534	3.17341	11.1943	2.6905	2.32737	5.05719	6.03597	8.23397	2.8183	4.62152
FBgn0039008	CG6972	protein_coding	3R	8.51518	55.4029	17.347	3.42916	21.6006	23.5309	21.1691	22.3546	34.0007	41.123	47.9769	48.1937	6.47406	21.9153	12.6679	15.6984	4.00463	4.85332	0	0	12.4341	1.27584	0	0	8.36313	10.6849	3.52944	9.19078	12.7679	11.7305	19.826	15.1114	6.83395	5.39495	9.06591	7.80435	3.3068	1.0578	7.99592	2.6905	12.4127	0	2.41439	12.351	6.34117	4.62152
FBgn0010052	Jhe	protein_coding	2R	0	0	0	0	0	0.797659	0	0.677411	0	1.22755	1.43215	1.88995	0	0	0	0	5.3395	10.5155	10.3137	6.94764	0	0	0	0	1.39386	0	0	1.0212	0	0	0	0	0	0	0	0	1.6534	5.28902	14.3927	0	0	0.56191	1.20719	2.74466	0	1.15538
FBgn0027291	Idh3a	protein_coding	X	620.544	66.1757	222.619	140.595	36.4976	39.4841	44.6902	44.7091	280.661	317.322	290.009	299.557	913.922	1083.59	913.67	643.634	112.797	241.857	421.714	200.092	45.2958	302.374	83.0411	379.043	52.9665	56.3388	51.1769	59.2294	202.158	248.016	200.593	236.115	596.262	587.376	536.022	567.116	257.93	194.636	387.002	263.669	24.8253	44.9528	136.413	27.4466	35.2287	46.7928
FBgn0051211	CG31211	protein_coding	3R	13.8372	3.07794	5.78232	5.14373	29.794	24.7274	25.8733	22.3546	31.528	46.0332	31.5072	36.854	24.8172	32.873	17.4183	29.4345	8.67669	10.5155	5.72981	15.2848	7.99337	14.0342	8.51703	1.67718	30.6648	33.9976	20.2943	21.4451	27.6637	23.461	25.6572	19.8337	18.2239	12.1386	10.1991	11.7065	4.96019	16.9249	11.1943	24.2145	7.75791	7.86674	13.2791	13.7233	27.4784	18.4861
FBgn0010620	CG10939	protein_coding	2R	7.45078	15.3897	0	13.7166	46.1807	40.2818	31.3616	32.5157	2.47278	0.613776	0	2.83492	5.39505	1.21752	3.16697	7.84919	5.3395	10.5155	8.02173	1.38953	6.21706	2.55168	0	3.35436	18.1201	11.6563	15.0001	7.14838	1.06399	1.67578	1.16624	2.83338	1.70849	1.34874	1.13324	2.60145	4.96019	3.17341	3.19837	5.381	10.8611	3.93337	2.41439	16.4679	16.2052	12.1315
FBgn0283680	IP3K2	protein_coding	X	5.32199	1.53897	1.44558	8.57289	17.8764	17.9473	7.84039	14.2256	0	0.613776	0.716073	0	6.47406	8.52263	12.6679	7.84919	2.00231	4.85332	5.72981	6.94764	4.44076	2.55168	2.12926	10.0631	12.5447	5.82815	7.05888	7.14838	1.06399	1.67578	0	0	5.12546	6.06932	5.66619	2.60145	0	2.11561	0	2.6905	3.87895	2.24764	4.82878	2.74466	21.8418	8.08765
FBgn0086672	snoRNA:Or-aca5	snoRNA	2R	0	0	0	0	0	0	0	0	0	0	0	0	0	0	0	0	0	0	0	0	0	0	0	0	0	0	0	0	0	0	0	0	0	0	0	0	0	0	0	0	0	0	0	0	0	0
FBgn0015371	chn	protein_coding	2R	3.19319	0	2.89116	6.85831	12.6624	19.5426	7.84039	9.48375	11.1275	11.6617	7.16073	16.0646	1.07901	0	1.58348	3.9246	4.67207	2.42666	1.14596	0	2.66446	6.3792	0	0	1.39386	7.77087	5.29416	7.14838	6.38394	5.02735	13.9948	5.66677	2.84748	3.37185	3.39972	2.60145	0	0	0	0	0.775791	3.37146	1.20719	0	8.45489	2.31076
FBgn0035268	CG8001	protein_coding	3L	2.12879	1.53897	1.44558	0.857289	13.4073	8.77425	6.27232	11.516	8.03654	8.59286	9.30895	6.61482	6.47406	7.30511	9.5009	7.84919	5.3395	2.42666	1.14596	1.38953	1.7763	0	4.25852	1.67718	11.1508	8.74223	4.4118	9.19078	5.31995	11.7305	4.66495	11.3335	1.70849	5.39495	3.39972	7.80435	0	0	0	0	0	1.68573	4.82878	0	4.93202	14.4422
FBgn0035505	Teh2	protein_coding	3L	0	0	0	0	0	0	0	0	0	0	0	0	0	1.21752	0	1.9623	0	0	0	0	0	0	0	0	0	0	0	0	0	0	0	0	0	0	0	0	0	0	0	0	0	0	0	0	0	0
FBgn0038717	CG17751	protein_coding	3R	0	1.53897	0	0.857289	0	0	0	0	0	0	0	0	0	0	0	0	0	0	0	0	0.888152	0	0	0	0	0	0	0	0	0	0	0	0	0.674369	0	0	0	0	0	0	1.55158	1.68573	0	2.74466	0	0
FBgn0030304	Cyp4g15	protein_coding	X	0	0	0	0	0	0	0	0	0	0	0	0	8.63208	20.6978	17.4183	17.6607	2.00231	3.23555	3.43788	2.77906	0	0	0	0	0	0.971359	0	0	0	0	0	0	11.3899	10.7899	5.66619	2.60145	1.6534	2.11561	3.19837	5.381	0	0	0	0	0	0
FBgn0032850	Kua	protein_coding	2L	0	0	0	0	0	0	0	0	1.23639	0.613776	0	0	0	0	0	0	0	0	0	0	0	0	0	0	1.39386	0	0	0	0	0	0	0	0	0	0	0	0	0	0	0	0	0	0	0	0	0
FBgn0033190	Gpo2	protein_coding	2R	0	0	1.44558	0.857289	0	0.39883	0	0	0	0	1.43215	0.944975	0	0	0	0	0	0	0	1.38953	0	0	2.12926	0	0	0.971359	0	0	0	0	0	0	1.13899	0	0	1.30073	3.3068	4.23122	1.59918	2.6905	2.32737	0.56191	0	0	0	0.577689
FBgn0033658	Twdlbeta	protein_coding	2R	1.0644	0	1.44558	0.857289	0	0	0	0	0.618195	0	0	0	97.1109	87.6613	190.018	351.251	0	0	0	0	0.888152	0	0	1.67718	8.36313	6.79951	1.76472	3.06359	0	0	0	0	42.1427	103.179	31.7307	49.4276	0	0	0	0	0	0	6.03597	1.37233	0.704574	2.31076
FBgn0030872	Ucp4A	protein_coding	X	6.38638	3.07794	4.33674	0.857289	6.70365	3.58947	7.05635	4.06446	9.27293	8.59286	12.1732	9.44975	15.1061	7.30511	6.33393	5.8869	6.00694	1.61777	5.72981	5.55812	3.55261	5.10336	6.38777	1.67718	2.78771	9.71359	9.70596	6.12718	4.25596	8.37891	6.99742	7.55569	10.2509	14.1618	10.1991	10.4058	0	1.0578	0	10.762	3.87895	5.05719	6.03597	5.48931	5.63659	4.04383
FBgn0283479	Alp1	protein_coding	3L	19.1592	24.6235	33.2483	55.7238	0	0	0	0	0	0	0	0	0	0	0	0	0	0	0	0	36.4142	62.5162	23.4218	16.7718	0	0	0	0	0	0	0	0	0	0	0	0	0	0	0	0	0	14.6097	12.0719	2.74466	0	0
FBgn0052112	CG32112	protein_coding	3L	3.19319	0	0	0	2.9794	2.79181	2.35212	6.0967	7.41834	8.59286	12.1732	9.44975	15.1061	17.0453	26.9192	13.7361	3.33719	0.808887	1.14596	1.38953	1.7763	2.55168	0	0	2.78771	7.77087	1.76472	4.08479	4.25596	10.0547	16.3273	8.50015	20.5018	12.1386	18.1318	15.6087	0	1.0578	1.59918	0	0.775791	0.56191	2.41439	1.37233	2.8183	4.04383
FBgn0032143	CG4017	protein_coding	2L	0	0	0	0	0	0	0	0	0	0	0	0	0	0	0	0	0	0	0	0	0	0	0	0	0	0	0	0	0	0	0	0	0	0	0	0	0	0	0	0	0	0	0	0	0	0
FBgn0083120	Uhg8	ncRNA	3L	0	0	0	0	0	0	0	0	0	0	0	0	0	0	0	0	0	0	0	0	0	0	0	0	0	0	0	0	0	0	1.16624	0.944461	0	0	0	0	0	0	0	0	0	0	0	0	0	0
FBgn0002121	l(2)gl	protein_coding	2L	11.7084	4.61691	17.347	24.8614	18.6212	26.3227	26.6573	12.8708	12.3639	14.7306	7.8768	17.0095	3.23703	8.52263	1.58348	7.84919	20.0231	12.9422	9.16769	5.55812	17.763	22.9651	12.7755	25.1577	6.96928	9.71359	8.8236	13.2756	11.7039	20.1094	11.6624	9.44461	5.12546	7.41806	5.66619	2.60145	24.801	6.34683	3.19837	2.6905	9.30949	20.7907	13.2791	4.11698	11.2732	12.7092
FBgn0003044	Pcl	protein_coding	2R	2.12879	0	2.89116	5.14373	32.7734	29.1146	33.7137	27.0964	15.4549	15.3444	17.9018	13.2296	2.15802	1.21752	3.16697	0	10.0116	0.808887	5.72981	5.55812	0.888152	1.27584	8.51703	3.35436	36.2402	38.8544	46.7651	57.1871	3.19197	21.7852	9.32989	12.278	1.13899	2.02311	0	3.90218	1.6534	4.23122	1.59918	8.07151	10.0853	5.05719	4.82878	4.11698	26.7738	25.996
FBti0020023		transposable_element	3L	0	0	0	0	0	0	0	0	0	0	0.716073	0	0	0	0	0	0	0	0	0	0	0	0	0	0	0	0	0	0	0	0	0	0	0	0	0	0	0	0	2.6905	0	1.12382	0	0	0	0.577689
FBgn0047205	lncRNA:CR32385	ncRNA	3L	0	0	0	0	0	0.797659	1.56808	0.677411	0	0.613776	0	0	1.07901	0	0	0	0	0	1.14596	2.77906	0	0	0	0	0	2.91408	0	1.0212	1.06399	3.35157	0	0.944461	0.569496	0.674369	0	1.30073	0	0	1.59918	0	0.775791	0.56191	0	0	0	1.73307
FBgn0004584	Rrp1	protein_coding	2L	1.0644	0	1.44558	0	8.19335	9.17308	10.9766	12.1934	4.94556	0	5.72858	8.50477	4.31604	0	3.16697	5.8869	0	0	0	0	4.44076	3.82752	6.38777	1.67718	2.78771	7.77087	10.5883	4.08479	3.19197	0	4.66495	2.83338	0	1.34874	1.13324	1.30073	0	2.11561	0	0	3.87895	1.68573	3.62158	1.37233	9.15946	4.62152
FBgn0259111	Ndae1	protein_coding	2L	0	1.53897	0	0	2.23455	1.59532	2.35212	4.06446	1.23639	0.613776	0.716073	0	6.47406	4.87007	1.58348	3.9246	1.33488	4.85332	3.43788	2.77906	0.888152	2.55168	2.12926	0	6.96928	7.77087	14.1178	10.212	4.25596	0	4.66495	4.72231	3.41697	10.1155	4.53295	13.0073	0	2.11561	4.79755	8.07151	0	0	1.20719	0	12.6823	7.50996
FBti0020426		transposable_element	4	0	0	0	0	0	0	0	0	0	0	0	0	0	0	0	0	0	0	0	0	0	0	0	0	0	0	0	0	0	0	0	0	0	0.674369	0	0	0	0	0	0	0	0	0	0	0	0
FBgn0043854	slam	protein_coding	2L	0	0	0	0	0	0	0	0	0	0	0	0	0	0	0	0	1.33488	0	0	0	0	0	0	0	0	0	0	0	0	0	0	0	0	0	0	0	0	0	0	0	0	0	0	0	0	0
FBgn0033479	PIG-N	protein_coding	2R	0	0	0	0	0	0.39883	0	0	0	0	0	0	0	0	0	0	0.667438	0	0	0	0	0	0	0	0	0	0	0	1.06399	0	0	0	0	0	0	0	0	1.0578	0	0	0	0.56191	0	0	0	0
FBgn0265703	lncRNA:CR44510	ncRNA	3L	0	0	0	0	0	0	0	0	0	0	0	0	0	0	0	0	0	0	0	0	0	0	0	0	0	0	0	0	0	0	0	0	0	0	0	0	0	0	0	0	0	0	0	0	1.40915	0
FBgn0260764	CG42562	protein_coding	2R	0	1.53897	0	0	0	0	0	0	0.618195	0	0	0	0	0	0	0	0	0	0	0	0	0	0	0	0	0	0	0	0	0	0	0	0	0	0	0	0	0	0	0	0	0	1.20719	0	0.704574	0
FBgn0032899	CG9338	protein_coding	2L	65.9926	26.1625	46.2586	40.2926	10.4279	14.3579	15.6808	20.9997	3.09098	0	0.716073	0.944975	22.6592	32.873	25.3357	5.8869	3.33719	4.04444	5.72981	5.55812	20.4275	38.2752	36.1974	36.8979	39.0279	43.7112	30.8826	32.6783	2.12798	3.35157	2.33247	0	6.83395	9.44117	9.06591	11.7065	8.26699	8.46244	11.1943	13.4525	12.4127	23.6002	33.8014	12.351	34.5241	28.8845
FBgn0030033	CG1387	protein_coding	X	0	0	0	0	0	0	0	0	0	0	0	0	0	0	0	0	0	0	0	0	0	0	0	0	0	0	0	0	0	0	0	0	0	0	0	0	0	0	1.59918	0	0	0	0	0	0	0
FBgn0005655	PCNA	protein_coding	2R	3.19319	1.53897	1.44558	3.42916	5.9588	9.97074	5.48828	12.8708	11.7457	4.29643	2.14822	3.7799	8.63208	1.21752	1.58348	11.7738	12.0139	9.70665	3.43788	22.2325	1.7763	3.82752	2.12926	6.70872	6.96928	12.6277	7.05888	3.06359	7.44793	1.67578	6.99742	6.61123	3.41697	2.69748	1.13324	1.30073	1.6534	1.0578	1.59918	18.8335	6.98212	3.93337	3.62158	2.74466	2.8183	3.46614
FBgn0002535	Lcp4	protein_coding	2R	1220.86	641.75	1561.23	1648.57	2.9794	0.797659	0	0.677411	0	0	0.716073	2.83492	0	0	0	0	0	0	0	0	625.259	2546.58	632.39	583.658	0	0	0	0	0	0	0	0.944461	0	0.674369	0	0	0	0	0	0	87.6644	155.649	560.138	67.2441	0	1.15538
FBgn0263916	Ent2	protein_coding	2L	1.0644	1.53897	1.44558	0.857289	7.4485	6.7801	6.27232	10.8386	4.32737	4.29643	5.01251	5.66985	6.47406	4.87007	4.75045	13.7361	0.667438	2.42666	2.29192	1.38953	0.888152	0	0	1.67718	4.18157	2.91408	1.76472	4.08479	5.31995	3.35157	4.66495	2.83338	4.55596	1.34874	0	1.30073	1.6534	2.11561	1.59918	2.6905	0	0	0	0	2.8183	2.31076
FBgn0003545	sub	protein_coding	2R	0	0	0	0	0	0	0	0	0	0	0	0	0	0	0	0	0	0	0	0	0	0	0	0	0	0	0.88236	0	0	0	0	0	0	0	0	1.30073	0	0	0	0	0	0	1.20719	0	0	0
FBgn0265830	lncRNA:CR44619	ncRNA	X	0	0	0	0	0	0	0	0	0	0	0	0	0	0	0	0	0	0	0	0	0	0	0	0	0	0	0	0	0	0	0	0	0.569496	0	0	0	0	0	0	0	0	0	0	0	0.704574	0
FBti0061590		transposable_element	X	0	0	0	0	0	0	0	0	0	0	0	0	0	0	0	0	0	0.808887	0	0	0	0	0	0	0	0	0	0	0	0	0	0	0	0	0	0	0	0	0	0	0	0	0	0	0	0
FBgn0030351	CG1840	protein_coding	X	2.12879	0	2.89116	0.857289	3.72425	2.39298	3.13616	6.0967	4.94556	1.84133	4.29644	0.944975	3.23703	2.43504	1.58348	0	2.66975	1.61777	1.14596	4.16859	0	0	0	0	2.78771	4.85679	8.8236	7.14838	2.12798	1.67578	3.49871	0.944461	0.569496	2.69748	4.53295	3.90218	3.3068	1.0578	1.59918	0	1.55158	0.56191	1.20719	1.37233	0.704574	2.31076
FBgn0036447	CG17173	protein_coding	3L	0	0	0	0	0	0	0	0	0	0	0	0	0	0	0	0	0	0	0	0	0	0	0	0	0	0	0	0	0	0	0	0	0	0	0	0	0	0	0	0	0	0	0	0	0	0
FBgn0000153	b	protein_coding	2L	2.12879	75.4095	15.9014	14.5739	0.74485	0.39883	3.9202	3.38705	1.23639	0	0	1.88995	0	0	0	0	22.6929	50.9599	48.1304	45.8544	74.6048	19.1376	31.9389	15.0946	8.36313	15.5417	8.8236	8.16958	2.12798	0	0	0.944461	1.70849	4.04622	0	1.30073	59.5223	31.7341	76.7608	43.048	129.557	17.9811	27.7655	159.19	34.5241	34.6614
FBgn0262962	CG43273	protein_coding	3R	0	3.07794	0	1.71458	0	1.19649	0.784039	1.35482	0	0.613776	0	0	0	1.21752	0	1.9623	0.667438	0.808887	2.29192	2.77906	0	0	2.12926	1.67718	0	0.971359	0.88236	3.06359	1.06399	0	1.16624	0	0.569496	0.674369	1.13324	0	0	1.0578	0	0	0.775791	0.56191	0	0	2.11372	1.15538
FBgn0038049	Srlp	protein_coding	3R	7.45078	4.61691	1.44558	6.85831	6.70365	4.38712	6.27232	4.06446	9.89112	9.82041	10.025	11.3397	10.7901	7.30511	9.5009	23.5476	4.00463	3.23555	1.14596	4.16859	3.55261	5.10336	6.38777	8.3859	9.75699	7.77087	7.05888	5.10599	11.7039	16.7578	16.3273	9.44461	6.83395	4.04622	12.4656	6.50363	0	2.11561	0	2.6905	6.20633	6.18101	7.24316	0	6.34117	5.77689
FBgn0005777	PpD3	protein_coding	3R	4.25759	4.61691	2.89116	9.43018	9.68304	11.9649	10.9766	14.903	22.255	22.7097	17.9018	10.3947	15.1061	18.2628	3.16697	7.84919	12.0139	12.1333	9.16769	9.7267	5.32891	3.82752	10.6463	3.35436	19.514	14.5704	14.1178	15.318	11.7039	20.1094	17.4936	17.9448	12.5289	11.4643	10.1991	9.10508	8.26699	6.34683	3.19837	10.762	10.0853	10.6763	7.24316	13.7233	11.9778	7.50996
FBti0062928		transposable_element	2L	0	0	0	0	0	0	0	0	0	0	0	0	0	0	0	0	0	0	0	0	0	0	0	0	0	0	0	0	0	0	0	0	0	0	0	0	0	0	0	0	0	0.56191	0	0	0	0
FBgn0026749	Yippee	protein_coding	X	5.32199	3.07794	10.1191	6.00102	10.4279	7.17893	7.84039	2.70964	5.56376	1.22755	7.8768	5.66985	9.71109	7.30511	12.6679	11.7738	10.0116	4.04444	4.58384	6.94764	7.10522	17.8618	12.7755	21.8033	13.9386	8.74223	7.94124	9.19078	6.38394	8.37891	4.66495	7.55569	14.2374	25.626	14.7321	26.0145	9.92039	4.23122	6.39673	5.381	6.98212	9.55248	19.3151	13.7233	7.04574	8.66534
FBgn0034240	MESR4	protein_coding	2R	1.0644	3.07794	1.44558	3.42916	2.23455	4.78595	8.62443	9.48375	6.80015	9.20664	5.01251	4.72487	1.07901	4.87007	4.75045	0	7.34182	12.1333	13.7515	4.16859	13.3223	6.3792	14.9048	3.35436	2.78771	1.94272	0.88236	4.08479	1.06399	6.70313	11.6624	17.0003	1.70849	3.37185	2.26648	3.90218	16.534	11.6358	11.1943	13.4525	10.8611	12.362	3.62158	0	2.8183	5.77689
FBgn0261238	Alh	protein_coding	3R	7.45078	6.15588	5.78232	1.71458	11.1727	13.5602	15.6808	10.1612	11.7457	13.5031	15.7536	14.1746	1.07901	3.65256	1.58348	1.9623	0	1.61777	3.43788	1.38953	4.44076	5.10336	2.12926	1.67718	9.75699	10.6849	16.7648	12.2544	7.44793	13.4063	17.4936	16.0558	1.70849	2.02311	4.53295	1.30073	1.6534	1.0578	3.19837	0	5.43054	2.24764	0	4.11698	7.04574	2.88845
FBgn0036834	CG6836	protein_coding	3L	0	0	0	0	0	0	0	0.677411	0	0	0.716073	0	3.23703	4.87007	7.91742	7.84919	0	2.42666	2.29192	0	0	1.27584	0	1.67718	0	0	0	0	0	0	0	0	8.54243	15.5105	11.3324	9.10508	4.96019	4.23122	20.7894	5.381	0	0	0	0	0	0
FBgn0036621	roq	protein_coding	3L	17.0304	20.0066	11.5646	6.85831	16.3867	15.5544	10.9766	18.2901	13.6003	19.027	10.025	14.1746	9.71109	9.74015	7.91742	7.84919	22.0255	29.9288	32.0869	12.5058	19.5393	15.3101	10.6463	13.4174	8.36313	10.6849	18.5296	16.3392	14.8959	13.4063	12.8286	9.44461	15.9459	18.8823	14.7321	9.10508	24.801	20.0983	23.9878	13.4525	24.0495	14.6097	9.65755	21.9572	7.75031	4.04383
FBgn0042101	CG18744	protein_coding	3R	0	0	0	0	0.74485	0	0.784039	0.677411	0	0	0	0	0	0	0	0	0	0	0	0	0	2.55168	0	0	1.39386	0	0.88236	1.0212	1.06399	0	0	0.944461	0	2.02311	0	0	0	0	0	0	0	1.12382	2.41439	0	2.11372	0.577689
FBgn0010350	Cds	protein_coding	3L	4.25759	0	5.78232	3.42916	0.74485	0	0.784039	2.03223	1.23639	1.22755	0.716073	0.944975	1.07901	6.08759	3.16697	1.9623	1.33488	0.808887	0	1.38953	0	0	0	0	0	0	0	0	0	1.67578	1.16624	2.83338	0	0.674369	3.39972	1.30073	0	3.17341	1.59918	0	0	2.24764	0	0	0.704574	0.577689
FBgn0036842	Ugt316A1	protein_coding	3L	13.8372	12.3118	2.89116	12.002	11.9176	14.3579	14.1127	13.5482	6.18195	7.36531	6.44466	8.50477	1.07901	1.21752	4.75045	3.9246	41.3812	78.4621	85.9471	52.8021	8.88152	7.65504	6.38777	3.35436	2.78771	2.91408	6.17652	8.16958	13.8319	11.7305	5.83118	10.3891	5.12546	0.674369	3.39972	2.60145	67.7893	72.9885	102.348	64.5721	17.0674	10.1144	10.8647	5.48931	15.5006	5.77689
FBgn0035431	CG14968	protein_coding	3L	0	0	0	0	0	0	0	0	0	0	0	0	0	0	0	0	0.667438	0	0	0	0	0	0	0	0	0	0	1.0212	0	0	0	0	0	0	0	0	0	0	0	0	0	0	0	0	0	0.577689
FBgn0037891	CG5214	protein_coding	3R	222.459	21.5456	89.626	49.7228	10.4279	11.5661	8.62443	5.41929	57.4922	63.8327	65.8787	58.5884	173.721	203.326	201.102	184.456	42.0486	63.0932	129.494	68.0869	11.546	90.5847	21.2926	114.048	8.36313	11.6563	5.29416	7.14838	40.4316	51.9493	54.8131	58.5566	145.221	168.592	167.719	191.207	34.7214	38.081	99.1494	67.2626	4.65475	11.2382	60.3597	10.9786	11.2732	9.24303
FBgn0028425	JhI-21	protein_coding	2L	1.0644	1.53897	0	0	0	0	0	0	0	0	0	0	0	1.21752	1.58348	0	0	0.808887	1.14596	0	0	0	0	0	0	0.971359	0	0	0	0	0	0	1.13899	0	0	0	0	0	0	0	0	0	0	0	0.704574	0
FBgn0029131	Debcl	protein_coding	2R	0	1.53897	2.89116	3.42916	2.23455	5.18478	0.784039	4.06446	0	0	0	0.944975	1.07901	1.21752	1.58348	3.9246	6.00694	7.27999	6.87577	4.16859	2.66446	6.3792	0	0	2.78771	1.94272	2.64708	2.04239	1.06399	0	0	0	0.569496	0	1.13324	2.60145	0	1.0578	0	0	0.775791	1.12382	0	1.37233	1.40915	1.15538
FBti0062333		transposable_element	2R	0	0	0	0	0.74485	1.99415	1.56808	3.38705	0.618195	0	0.716073	0.944975	0	0	0	0	0	0	0	0	0	0	0	0	2.78771	3.88544	2.64708	0	2.12798	0	3.49871	1.88892	1.70849	0	0	0	0	0	0	0	0	0	0	1.37233	0.704574	0.577689
FBgn0039182	CG5728	protein_coding	3R	2.12879	0	0	0	0.74485	1.19649	0.784039	2.03223	3.70917	6.13776	7.16073	0.944975	0	1.21752	0	0	0.667438	0	1.14596	0	0.888152	0	0	0	2.78771	0.971359	0.88236	1.0212	5.31995	1.67578	9.32989	8.50015	2.84748	0.674369	2.26648	0	1.6534	0	0	0	0	0.56191	0	0	3.52287	1.73307
FBgn0034231	APC10	protein_coding	2R	0	0	0	0	0	0.797659	0	0.677411	0.618195	0	0	0	0	0	0	0	0	0	0	0	0	0	0	0	1.39386	2.91408	0	0	0	0	1.16624	0	0.569496	0.674369	0	0	0	0	0	0	0	0	1.20719	0	0	0.577689
FBgn0036725	CG18265	protein_coding	3L	0	0	0	0	0	0	0	0	0	0	0	0	0	0	0	0	0	0	0	0	0	0	0	0	0	0	0	0	0	0	0	0	0	0	0	0	0	0	0	0	0	0	0	0	0	0
FBgn0262808	CG43179	protein_coding	3R	0	0	0	0	0	0	0	0	0.618195	0	0	0	0	0	0	0	0	0	0	0	0	0	0	0	0	0	0	0	0	0	0	0	0	0.674369	0	0	0	0	0	0	0	0	0	0	0	0
FBgn0083990	lncRNA:sphinx	ncRNA	4	0	0	0	0	0	0	0	0	0	0	0	0	0	1.21752	0	0	0	0	0	0	0	0	0	0	0	0	0	0	0	0	0	0	0	0	0	0	0	0	0	0	0	0	0	0	0	0
FBgn0085345	CG34316	protein_coding	3R	0	0	0	0	0	0	0	0	0.618195	0	0	0	0	0	0	0	0	0	0	0	0	0	0	0	0	0	0	0	1.06399	0	0	0.944461	0.569496	0	0	0	0	0	0	0	0	0	0	0	0	0
FBgn0085383	CG34354	protein_coding	3R	0	0	0	0	0	0.797659	0	0	0	0	0	0	0	0	0	0	0	0	0	0	0	0	0	0	0	0	0	1.0212	0	0	1.16624	0	0	0	0	0	0	1.0578	0	0	0	0	0	0	0	0
FBti0062026		transposable_element	4	0	3.07794	0	0	0	0	0.784039	0	0	0	0	0	0	0	1.58348	0	0	0.808887	0	0	0	1.27584	0	0	0	0	0.88236	0	1.06399	0	0	0	0	0	0	0	0	0	0	0	0	0	0	0	0	0
FBgn0033362	CG8172	protein_coding	2R	0	0	0	0	0	0	0	0	0	0.613776	0	0.944975	16.1852	13.3927	15.8348	37.2837	0	0.808887	0	0	0	0	0	0	0	0	0	0	5.31995	0	0	2.83338	0.569496	4.04622	3.39972	3.90218	0	0	0	0	0	0	0	0	0	0
FBgn0262743	Fs(2)Ket	protein_coding	2L	51.0911	35.3963	37.5851	65.154	148.97	130.018	143.479	141.579	107.566	128.279	105.263	118.122	76.6097	80.3562	76.0072	92.228	33.3719	35.591	29.795	31.9592	55.0654	58.6887	48.9729	40.2523	143.567	169.988	142.942	145.01	155.343	180.985	111.959	123.724	69.4785	51.2521	56.6619	65.0363	41.3349	32.7919	25.5869	61.8815	58.9601	48.3243	37.423	80.9674	142.324	194.681
FBgn0266549	lncRNA:CR45102	ncRNA	X	17.0304	4.61691	20.2381	16.2885	2.23455	12.3637	10.9766	6.0967	3.70917	7.36531	2.86429	2.83492	9.71109	7.30511	6.33393	9.81149	4.00463	7.27999	11.4596	6.94764	12.4341	11.4826	14.9048	18.449	6.96928	4.85679	8.8236	7.14838	3.19197	15.082	2.33247	3.77785	14.8069	15.5105	13.5989	5.2029	18.1874	8.46244	15.9918	16.143	7.75791	16.2954	8.45036	5.48931	4.93202	6.93227
FBgn0036263	thoc6	protein_coding	3L	1.0644	0	1.44558	0	2.23455	1.19649	2.35212	3.38705	1.85459	2.4551	0.716073	0.944975	1.07901	0	0	0	0	0	0	0	0.888152	0	0	0	5.57542	7.77087	2.64708	7.14838	5.31995	3.35157	2.33247	0	0	0	0	2.60145	0	0	0	0	1.55158	1.12382	2.41439	1.37233	4.22744	2.31076
FBgn0261089	Sytalpha	protein_coding	2L	0	0	0	0	0	0	0	0	0	0	0	0	0	0	0	0	0	0	0	0	0	0	0	0	0	0	0	0	0	0	0	0	0	0	0	0	1.6534	0	0	0	0	0	0	0	0	0
FBgn0010830	l(3)04053	protein_coding	3L	7.45078	4.61691	5.78232	2.57187	5.9588	2.39298	6.27232	4.74187	3.70917	6.75153	4.29644	6.61482	4.31604	1.21752	1.58348	3.9246	10.0116	5.66221	9.16769	2.77906	5.32891	6.3792	6.38777	0	5.57542	2.91408	2.64708	5.10599	8.51192	1.67578	3.49871	2.83338	2.27798	2.02311	2.26648	2.60145	1.6534	3.17341	0	2.6905	2.32737	6.18101	10.8647	4.11698	0.704574	2.31076
FBgn0264087	Slob	protein_coding	2L	0	0	0	0	0	0	0	0	0	0	0	0	0	0	0	0	0	0	0	0	0	0	0	0	0	0	0	0	0	0	0	0	0	0	0	0	0	1.0578	0	0	0	0	0	0	0	0
FBgn0031893	MICU1	protein_coding	2L	20.2235	13.8507	20.2381	19.7176	7.4485	7.97659	5.48828	8.80634	16.0731	12.8893	18.6179	11.3397	30.2123	38.9606	33.2532	15.6984	18.0208	23.4577	16.0435	19.4534	5.32891	2.55168	2.12926	1.67718	2.78771	0.971359	1.76472	2.04239	6.38394	8.37891	8.16366	5.66677	9.68142	5.39495	6.79943	11.7065	8.26699	7.40463	1.59918	8.07151	3.10316	3.93337	0	2.74466	0.704574	0
FBgn0040080	pins	protein_coding	3R	7.45078	1.53897	5.78232	8.57289	8.93819	17.9473	14.1127	10.8386	8.03654	7.97908	4.29644	3.7799	2.15802	4.87007	3.16697	0	6.00694	1.61777	2.29192	4.16859	8.88152	8.93088	6.38777	5.03154	16.7263	7.77087	10.5883	13.2756	3.19197	8.37891	3.49871	8.50015	2.27798	4.04622	4.53295	2.60145	6.61359	10.578	1.59918	2.6905	6.98212	3.37146	6.03597	8.23397	7.75031	6.93227
FBgn0031134	CG1314	protein_coding	X	0	0	0	0	0	0	0	0	0	0	0	0	0	0	0	0	0	0	0	0	0	0	0	0	0	0	0	0	0	0	0	0	0	0	0	0	0	0	1.59918	0	0	0	0	0	0	0
FBgn0037383	Sec20	protein_coding	3R	0	6.15588	2.89116	4.28645	0.74485	0.797659	0	0	0	0	0	0	1.07901	1.21752	0	0	13.3488	8.08887	3.43788	13.8953	2.66446	2.55168	4.25852	0	0	0	0	0	0	0	0	0	0	0	0	0	8.26699	9.52024	11.1943	13.4525	3.87895	3.37146	2.41439	2.74466	0.704574	0.577689
FBgn0000635	Fas2	protein_coding	X	18.0948	43.0911	17.347	19.7176	89.3819	88.939	85.4603	114.482	25.346	22.7097	20.05	22.6794	14.0271	17.0453	22.1688	31.3968	14.0162	8.89776	8.02173	1.38953	62.1706	21.6893	48.9729	15.0946	91.9945	102.964	69.7065	75.5686	19.1518	21.7852	34.9871	16.0558	17.0849	12.1386	19.2651	18.2102	11.5738	7.40463	11.1943	5.381	49.6506	23.6002	19.3151	80.9674	113.436	101.673
FBgn0002284	Prosbeta6	protein_coding	3L	70.2502	123.118	101.191	105.447	49.1601	37.8888	59.587	60.967	9.89112	8.59286	15.7536	13.2296	28.0543	37.7431	64.9228	31.3968	240.278	202.222	230.338	254.284	183.847	118.653	289.579	124.111	167.263	169.988	134.119	161.349	21.2798	41.8946	48.9819	35.8895	74.0344	56.647	82.7264	94.953	266.197	252.815	270.262	263.669	205.585	190.488	173.836	211.339	108.504	124.781
FBgn0029936	CG4617	protein_coding	X	1.0644	0	0	0	2.23455	2.79181	3.9202	2.70964	1.85459	1.84133	2.14822	2.83492	0	0	0	3.9246	2.00231	3.23555	3.43788	1.38953	0.888152	1.27584	0	0	0	0	1.76472	6.12718	2.12798	0	2.33247	0.944461	1.70849	0.674369	0	1.30073	4.96019	4.23122	3.19837	0	0.775791	0	0	1.37233	0	2.88845
FBgn0016034	mael	protein_coding	3L	0	0	0	0	3.72425	1.59532	0.784039	3.38705	4.32737	6.13776	3.58036	3.7799	0	1.21752	0	0	0	0	0	0	0	0	0	0	0	0	0	0	1.06399	1.67578	5.83118	0	3.41697	0.674369	2.26648	1.30073	0	2.11561	0	0	0	0	0	0	2.8183	2.31076
FBgn0037779	CG12811	protein_coding	3R	1.0644	4.61691	2.89116	0	11.1727	7.17893	9.40847	3.38705	1.23639	0.613776	0.716073	0.944975	12.9481	8.52263	11.0844	17.6607	6.00694	11.3244	8.02173	12.5058	0.888152	1.27584	2.12926	0	13.9386	8.74223	11.4707	11.2332	1.06399	1.67578	0	0.944461	7.97294	8.09243	12.4656	5.2029	0	2.11561	0	8.07151	1.55158	1.12382	1.20719	0	12.6823	12.7092
FBti0020219		transposable_element	3L	0	0	0	0	0	0	0	0	1.23639	1.22755	0	0.944975	1.07901	0	0	1.9623	0	0	0	0	1.7763	0	0	1.67718	0	0	0	0	1.06399	1.67578	2.33247	3.77785	0	0	0	0	0	0	0	0	0	1.12382	0	0	0	0
FBgn0050042	Cpr49Ab	protein_coding	2R	0	7.69484	0	0	0	0.39883	0	0	0	0	0	0	15.1061	24.3504	19.0018	33.3591	8.67669	4.04444	0	8.33717	6.21706	1.27584	6.38777	3.35436	0	0	0	0	0	0	0	0	19.9323	10.1155	10.1991	5.2029	1.6534	7.40463	0	0	1.55158	0	1.20719	0	0.704574	0
FBgn0283473	S6KL	protein_coding	X	0	0	1.44558	0	0.74485	0	0	0	0	0	0	0	0	0	0	0	3.33719	0	0	0	1.7763	0	0	0	1.39386	0	0	2.04239	0	0	0	0	0.569496	0	0	0	1.6534	4.23122	0	0	0	0	0	2.74466	0	0
FBgn0035519	CG1309	protein_coding	3L	2.12879	3.07794	2.89116	0.857289	1.4897	0.797659	0.784039	0.677411	1.85459	0	1.43215	0	0	1.21752	0	3.9246	2.66975	0	0	4.16859	0	0	2.12926	1.67718	2.78771	0	1.76472	3.06359	0	0	0	1.88892	0	0	1.13324	0	0	0	0	0	0.775791	0	2.41439	0	0.704574	0.577689
FBgn0031456	Tnpo-SR	protein_coding	2L	4.25759	1.53897	2.89116	4.28645	5.21395	4.38712	2.35212	3.38705	1.23639	7.36531	4.29644	2.83492	2.15802	2.43504	0	5.8869	1.33488	1.61777	1.14596	5.55812	1.7763	1.27584	6.38777	1.67718	8.36313	3.88544	7.05888	6.12718	7.44793	6.70313	8.16366	12.278	0.569496	0	1.13324	0	4.96019	5.28902	6.39673	2.6905	6.20633	3.37146	3.62158	2.74466	6.34117	6.93227
FBgn0052407	CG32407	protein_coding	3L	3.19319	1.53897	4.33674	1.71458	1.4897	3.58947	2.35212	0	0	0	0	0.944975	4.31604	3.65256	4.75045	3.9246	4.67207	9.70665	2.29192	0	0	7.65504	4.25852	8.3859	2.78771	9.71359	2.64708	10.212	1.06399	0	0	1.88892	1.70849	0.674369	2.26648	0	9.92039	7.40463	4.79755	2.6905	0	1.68573	0	0	2.8183	6.35458
FBgn0000533	ea	protein_coding	3R	0	0	0	0.857289	0	0	0	0.677411	0	0	0	0	0	0	0	0	0	0	0	0	0	3.82752	0	0	0	0	0	0	0	0	0	0	0	0	0	0	0	0	0	0	0	0.56191	1.20719	0	0.704574	0
FBgn0025720	Ate1	protein_coding	2R	4.25759	10.7728	4.33674	5.14373	10.4279	6.38127	10.9766	8.12893	8.03654	7.36531	12.8893	4.72487	7.55307	6.08759	7.91742	9.81149	16.0185	7.27999	13.7515	13.8953	7.99337	2.55168	8.51703	3.35436	9.75699	14.5704	4.4118	7.14838	12.7679	6.70313	5.83118	11.3335	3.98647	2.02311	7.93267	2.60145	3.3068	9.52024	6.39673	13.4525	3.87895	6.74292	4.82878	5.48931	4.22744	2.88845
FBgn0263025	HSPBAP1	protein_coding	3R	2.12879	0	1.44558	0.857289	0.74485	0	0.784039	0	0	0	0	0	2.15802	7.30511	1.58348	1.9623	0	0.808887	0	1.38953	0	1.27584	0	1.67718	0	0.971359	0.88236	0	0	0	0	0.944461	2.27798	4.04622	1.13324	0	1.6534	0	0	0	1.55158	0.56191	0	0	0	1.15538
FBgn0035371	AhcyL1	protein_coding	3L	26.6099	18.4676	15.9014	25.7187	75.2298	75.7776	79.972	96.8697	17.3095	23.9373	25.7786	13.2296	22.6592	23.1328	23.7523	11.7738	39.3788	30.7377	16.0435	30.5696	21.3157	19.1376	21.2926	20.1262	87.8129	77.7087	94.4125	102.12	24.4718	28.4883	38.4858	20.7782	26.1968	28.3235	22.6648	23.4131	39.6815	31.7341	38.3804	18.8335	27.1527	20.7907	24.1439	26.0742	90.8901	99.3626
FBti0062902		transposable_element	4	0	0	0	0	0	0	0	0	0	0	0	0	0	0	0	0	0	0	0	0	0	0	0	0	0	0	0	0	0	0	0	0	0	0	0	0	0	0	0	0	0	0	0	0	0	0
FBgn0264291	Det	protein_coding	3R	1.0644	0	0	0	0	0	0.784039	0	0	0	0	0	0	0	0	0	0	0	0	0	0	1.27584	0	0	0	0	0	0	0	0	0	0	0	0.674369	0	0	0	0	0	0	0	0	0	0	0.704574	0
FBti0019286		transposable_element	3R	2.12879	0	1.44558	0	0.74485	3.58947	4.70424	3.38705	0.618195	3.06888	3.58036	0.944975	2.15802	4.87007	4.75045	7.84919	2.00231	4.04444	4.58384	2.77906	0	0	0	0	1.39386	0	1.76472	1.0212	0	1.67578	1.16624	0	3.98647	2.02311	6.79943	7.80435	0	0	0	0	0	0.56191	0	0	0.704574	0
FBgn0263843	lncRNA:CR43704	ncRNA	2L	0	0	0	0	0	0.39883	0	0	0	0	0	0	0	0	0	1.9623	0	0	0	0	0	0	0	0	0	0	0	0	0	0	0	0	0	0	0	0	0	0	0	0	0	0	0	0	0	0
FBgn0003218	rdgB	protein_coding	X	19.1592	4.61691	14.4558	15.4312	10.4279	7.57776	10.1925	10.8386	7.41834	9.20664	10.025	7.5598	10.7901	12.1752	12.6679	11.7738	21.358	36.3999	32.0869	19.4534	10.6578	17.8618	6.38777	28.5121	15.3324	20.3985	16.7648	19.4028	6.38394	8.37891	1.16624	2.83338	23.9188	19.5567	19.2651	20.8116	41.3349	25.3873	30.3845	16.143	9.30949	21.3526	10.8647	6.86164	12.6823	16.1753
FBgn0010340	140up	protein_coding	3R	1.0644	3.07794	0	0.857289	0	1.19649	0	1.35482	3.09098	1.22755	4.29644	1.88995	7.55307	7.30511	1.58348	1.9623	0	0.808887	2.29192	0	0.888152	2.55168	0	0	2.78771	4.85679	0.88236	3.06359	3.19197	0	2.33247	3.77785	7.40344	12.1386	4.53295	5.2029	0	0	0	0	1.55158	1.68573	1.20719	0	0	0.577689
FBgn0085356	CG34327	protein_coding	X	0	0	0	0	0	0	0	0	0	0	0	0	1.07901	0	0	0	3.33719	1.61777	0	1.38953	0	0	0	0	0	0	0	0	0	0	0	0	1.13899	1.34874	0	0	6.61359	4.23122	6.39673	8.07151	0	0	0	0	0	0
FBti0060513		transposable_element	2R	0	0	0	0	0.74485	0	0	0	0	0	0	0	0	0	0	0	0	0	0	0	0	0	0	0	0	0	0	0	0	0	0	0	0	0	0	0	0	0	0	0	0	0	0	0	0	0
FBgn0034999	Fatp3	protein_coding	2R	1.0644	3.07794	4.33674	0	2.23455	2.39298	0.784039	4.74187	0	0	0	0	3.23703	2.43504	1.58348	0	4.00463	0.808887	1.14596	1.38953	0	0	0	0	6.96928	1.94272	1.76472	6.12718	0	0	2.33247	0	2.27798	2.02311	1.13324	1.30073	0	0	0	0	3.10316	1.12382	0	5.48931	3.52287	4.62152
FBgn0267023	asRNA:CR45467	ncRNA	2R	0	0	0	0	0	0	0	0	0	0	0	0	0	0	0	0	0	0	0	0	0	0	0	0	0	0	0	0	0	0	0	0	0	0	0	0	0	0	0	0	0	0	0	0	0	0
FBgn0015582	dare	protein_coding	2R	1.0644	0	2.89116	0.857289	0	0	0	1.35482	2.47278	1.84133	0	0	1.07901	1.21752	1.58348	3.9246	4.00463	2.42666	2.29192	1.38953	1.7763	0	4.25852	3.35436	0	0	0.88236	0	0	0	1.16624	3.77785	0.569496	2.02311	1.13324	2.60145	3.3068	4.23122	0	2.6905	1.55158	2.80955	4.82878	1.37233	0	0.577689
FBti0059769		transposable_element	3L	0	1.53897	0	0	0	0	0.784039	0	0	0	0	0	0	0	0	0	0	0	0	0	0	0	0	0	0	0	0.88236	0	0	0	0	0	0	0	0	0	0	0	0	0	0	0	0	0	0	0.577689
FBgn0039722	Capa	protein_coding	3R	0	0	0	0	0	0	0	0	0	0	0	0	0	0	0	0	0	0	0	0	0	0	0	0	2.78771	3.88544	0	4.08479	0	0	0	0.944461	0	0	0	1.30073	0	0	0	0	0	0	0	0	2.11372	2.88845
FBgn0053710	CG33710	protein_coding	3L	0	0	0	0	0	0	0	0	0	0	0	0	0	0	0	0	0	0	0	0	0	0	0	0	1.39386	0	0	0	0	0	0	0	0	0	0	0	0	0	0	0	0	0	0	0	0	0
FBgn0036577	CG13073	protein_coding	3L	0	0	0	0	0	0	0	0.677411	0	0	0	0	0	0	0	0	0	0	0	0	0	0	0	0	0	0	0	0	0	0	0	0	0	0	0	0	0	0	0	0	0	0	0	0	0	0
FBti0061058		transposable_element	2R	0	0	0	0	0	0	0	0	0	0	0	0	0	0	0	0	0	0	0	0	0	0	0	0	0	0	0	0	0	0	0	0	0	0	0	0	0	0	0	0	0	0	0	0	0	0
FBgn0030460	Coq5	protein_coding	X	3.19319	0	0	2.57187	0.74485	0.797659	0.784039	1.35482	3.09098	5.52398	5.72858	2.83492	5.39505	1.21752	1.58348	0	0	0.808887	0	1.38953	1.7763	2.55168	0	0	0	0.971359	0.88236	1.0212	7.44793	5.02735	5.83118	4.72231	5.12546	3.37185	3.39972	1.30073	0	0	0	0	1.55158	1.12382	2.41439	0	2.8183	1.15538
FBti0061716		transposable_element	2R	0	0	0	0	0	0	0	0	0.618195	0	0	0	0	0	0	0	0	0	0	0	0.888152	0	0	0	0	0	0	0	0	0	0	0	0	0	0	0	0	0	0	0	0	0	0	0	0	0
FBgn0265447	lncRNA:CR44347	ncRNA	3L	0	0	0	0	0	0	0	0	0	0	0	0	0	0	0	0	0	0	0	0	0	0	0	0	0	0	0	0	0	0	0	0	0	0	0	0	0	0	0	0	0	0	0	0	0	0
FBti0019877		transposable_element	2L	0	0	0	0	0	0.39883	0	0	0	0	0	0	0	0	0	0	0	0	0	0	0	0	0	0	0	0	0	0	0	0	0	0	0	0	0	0	0	0	0	0	0	0	0	0	0	0
FBgn0053462	CG33462	protein_coding	2R	0	0	0	0	0	0	0	0	0	0	0	0	0	0	0	0	0.667438	0	0	0	0	0	0	0	0	0	0	0	0	0	0	0	0	0	0	0	0	0	0	0	0	0	0	0	0	0
FBti0102119		transposable_element	4	0	0	0	0.857289	0	0	0	0	0	0	0	0	0	0	0	0	4.00463	1.61777	0	0	0.888152	0	0	0	0	0	0.88236	0	0	0	0	0	0	0	0	0	3.3068	2.11561	3.19837	0	0.775791	0.56191	0	0	0.704574	1.73307
FBgn0283659	THG	protein_coding	2L	0	0	0	0	0.74485	1.59532	2.35212	1.35482	0	0.613776	0.716073	0	2.15802	0	1.58348	0	0.667438	0	0	0	0.888152	2.55168	0	0	2.78771	2.91408	1.76472	1.0212	4.25596	0	4.66495	3.77785	0.569496	0.674369	3.39972	1.30073	0	0	0	0	0.775791	0	1.20719	1.37233	3.52287	1.15538
FBgn0038490	CG5285	protein_coding	3R	0	0	0	0	0	0.39883	0	0	0	0	0	0	0	0	0	0	0	0	0	0	0	0	0	0	0	0	0.88236	0	0	0	0	0	0	0	0	0	0	0	0	0	0	0	0	0	0	0
FBgn0035587	Gdap1	protein_coding	3L	0	0	0	0	0	0	0	0	0	0	0	0	0	0	0	0	0	0	0	0	0	0	0	0	0	0	0.88236	1.0212	0	0	0	0	0	0	0	0	0	0	0	0	0	0	0	0	0	0
FBgn0031542	CG15414	protein_coding	2L	3.19319	0	0	4.28645	0	0	0	0	0	0	0	0	1.07901	2.43504	1.58348	5.8869	0	2.42666	1.14596	1.38953	0	1.27584	4.25852	0	0	0	0	0	0	0	0	0	0.569496	0	2.26648	2.60145	3.3068	1.0578	1.59918	10.762	0	1.12382	1.20719	0	0	0
FBgn0033315	beta3GalTII	protein_coding	2R	0	0	1.44558	1.71458	0	1.59532	1.56808	2.03223	0	0	0	0	1.07901	0	0	0	0.667438	0	1.14596	0	0	0	0	3.35436	0	2.91408	1.76472	0	1.06399	3.35157	0	0.944461	0.569496	0.674369	2.26648	0	1.6534	0	0	0	0.775791	1.68573	1.20719	1.37233	1.40915	1.73307
FBgn0264617	asRNA:CR43957	ncRNA	4	0	0	0	0	0.74485	0	0	0.677411	0	0	0	0	0	0	0	0	0	0	0	0	0.888152	0	0	0	0	1.94272	0	0	0	1.67578	1.16624	0	1.13899	0	0	0	0	0	0	2.6905	0	0	0	0	0.704574	0
FBgn0265276	l(3)neo38	protein_coding	3R	1.0644	46.1691	1.44558	6.00102	85.6577	105.291	82.3241	95.5149	37.0917	27.6199	18.6179	43.4688	2.15802	6.08759	6.33393	3.9246	42.716	35.591	37.8167	33.3487	24.8683	0	6.38777	1.67718	72.4805	66.0524	82.0595	83.7382	22.3438	16.7578	13.9948	17.0003	2.84748	1.34874	4.53295	0	44.6417	28.5607	49.5747	18.8335	32.5832	13.4858	4.82878	21.9572	54.9568	79.7211
FBgn0030007	alpha-PheRS	protein_coding	X	3.19319	1.53897	1.44558	2.57187	8.19335	6.7801	5.48828	6.0967	7.41834	12.2755	10.7411	10.3947	1.07901	4.87007	9.5009	3.9246	2.66975	2.42666	5.72981	4.16859	4.44076	2.55168	2.12926	3.35436	11.1508	10.6849	7.05888	8.16958	12.7679	16.7578	12.8286	16.0558	5.12546	6.06932	11.3324	20.8116	0	3.17341	1.59918	8.07151	4.65475	4.49528	1.20719	0	20.4326	10.9761
FBgn0030661	Alp11	protein_coding	X	0	0	0	0	0	0	0	0	0	0	0	0	0	0	0	0	0	0	0	0	0	0	0	0	0	0	0	0	0	0	0	0	0	0	0	0	0	0	0	0	0	0	0	0	0	0
FBgn0014930	CG2846	protein_coding	3R	10.644	6.15588	2.89116	4.28645	3.72425	2.39298	2.35212	4.74187	6.18195	11.048	6.44466	7.5598	11.8691	6.08759	9.5009	13.7361	2.00231	1.61777	0	4.16859	0.888152	5.10336	2.12926	5.03154	1.39386	3.88544	2.64708	2.04239	5.31995	0	5.83118	9.44461	10.2509	14.1618	10.1991	9.10508	0	1.0578	0	0	3.10316	3.93337	9.65755	0	5.63659	1.73307
FBgn0267315	lncRNA:TS16	ncRNA	3R	0	0	0	0	0	0	0	0	0	0	0	0	0	0	0	0	0	0	0	0	0	0	0	0	0	0	0	0	0	0	0	0	0	0	0	0	0	0	0	0	0	0	0	0	0	0
FBti0020448		transposable_element	4	0	0	0	0	0	0	0	0	0	0	0	0	0	0	0	0	0	0	0	0	0	0	0	0	0	0	0	0	0	0	0	0	0.569496	0	0	0	1.6534	0	0	0	0	0	0	0	0	0
FBti0062802		transposable_element	2L	0	0	0	0	0	0	0	0	0	0	0	0	0	0	0	0	0	0	0	0	0	0	0	0	0	0	0	0	0	1.67578	0	0	0	0	0	0	0	0	0	0	0	0	0	0	0	0
FBgn0038809	CG16953	protein_coding	3R	71.3146	121.579	91.0715	91.7299	56.6086	52.2467	54.8828	58.9347	8.65473	7.36531	12.1732	16.0646	15.1061	14.6102	17.4183	5.8869	58.0671	50.9599	42.4006	30.5696	162.532	94.4122	142.66	83.859	45.9972	42.7398	45.0004	53.1023	12.7679	26.8125	12.8286	27.3894	22.2103	18.8823	21.5315	22.1123	74.4029	65.5839	46.3763	24.2145	166.019	241.621	103.819	188.009	62.7071	64.7012
FBgn0052412	QC	protein_coding	3L	0	0	0	0	0.74485	1.59532	3.13616	2.03223	0	0.613776	1.43215	0.944975	1.07901	0	0	0	2.00231	0.808887	2.29192	0	0.888152	0	0	0	0	0.971359	0	0	0	0	0	0.944461	1.70849	0	0	1.30073	0	1.0578	3.19837	2.6905	0.775791	0.56191	0	0	5.63659	1.73307
FBgn0027600	obst-B	protein_coding	2L	3.19319	1.53897	1.44558	6.85831	29.794	29.1146	29.7935	33.1931	3.09098	4.91021	5.01251	1.88995	1.07901	2.43504	6.33393	7.84919	10.679	8.08887	6.87577	12.5058	2.66446	5.10336	8.51703	3.35436	19.514	13.599	14.1178	9.19078	4.25596	3.35157	8.16366	0.944461	1.70849	4.04622	2.26648	0	4.96019	3.17341	6.39673	8.07151	3.10316	0.56191	6.03597	6.86164	23.2509	17.9084
FBgn0028572	qtc	protein_coding	2L	0	0	0	0	0	0	0	0	0	0	0	0.944975	5.39505	0	1.58348	1.9623	1.33488	1.61777	2.29192	0	0	0	0	0	0	0	0	0	0	0	0	0	2.84748	3.37185	3.39972	1.30073	0	0	1.59918	0	0	0	0	0	0	0
FBgn0030481	CG1662	protein_coding	X	10.644	3.07794	2.89116	8.57289	1.4897	1.59532	0.784039	0.677411	5.56376	8.59286	5.01251	0.944975	5.39505	9.74015	6.33393	3.9246	10.679	15.3689	6.87577	11.1162	0.888152	5.10336	6.38777	16.7718	0	3.88544	0.88236	2.04239	6.38394	8.37891	8.16366	16.0558	7.97294	9.44117	7.93267	15.6087	0	2.11561	0	16.143	2.32737	0.56191	8.45036	1.37233	4.22744	2.31076
FBgn0037116	Als2	protein_coding	3L	0	4.61691	1.44558	0.857289	0	3.19064	0	0	1.23639	1.22755	0.716073	0.944975	0	0	0	0	9.34413	8.89776	6.87577	6.94764	1.7763	1.27584	4.25852	3.35436	1.39386	1.94272	0	2.04239	1.06399	0	0	0	0.569496	0	0	0	8.26699	12.6937	3.19837	0	0.775791	0	2.41439	4.11698	2.11372	1.73307
FBgn0035848	Uxs	protein_coding	3L	1.0644	3.07794	5.78232	6.00102	4.4691	4.38712	1.56808	6.0967	1.85459	3.06888	2.14822	6.61482	2.15802	4.87007	0	1.9623	6.00694	4.85332	5.72981	8.33717	0.888152	3.82752	8.51703	1.67718	6.96928	5.82815	3.52944	5.10599	3.19197	1.67578	3.49871	9.44461	6.83395	4.72059	4.53295	0	1.6534	5.28902	7.99592	8.07151	4.65475	3.93337	8.45036	1.37233	4.22744	6.93227
FBgn0263415	lncRNA:CR43461	ncRNA	X	1.0644	1.53897	0	0	0	0	0	0	0	0	0	0	0	0	0	0	0	0	0	2.77906	0	1.27584	2.12926	3.35436	0	1.94272	0	0	0	0	0	0	0	0	0	1.30073	3.3068	0	0	8.07151	0	1.12382	0	0	0	0.577689
FBgn0035421	nSMase	protein_coding	3L	9.57958	6.15588	4.33674	6.00102	7.4485	9.97074	7.84039	10.1612	1.85459	2.4551	2.14822	1.88995	9.71109	9.74015	12.6679	13.7361	2.00231	2.42666	0	1.38953	5.32891	7.65504	2.12926	8.3859	15.3324	30.1121	16.7648	20.4239	6.38394	5.02735	9.32989	7.55569	15.3764	12.813	20.3983	19.5109	0	2.11561	6.39673	0	6.20633	11.2382	15.6935	5.48931	15.5006	12.1315
FBgn0038678	mRpL55	protein_coding	3R	2.12879	0	2.89116	1.71458	0	1.59532	2.35212	0.677411	4.32737	3.68265	4.29644	5.66985	10.7901	10.9577	6.33393	17.6607	0	1.61777	5.72981	4.16859	0.888152	1.27584	4.25852	1.67718	1.39386	1.94272	1.76472	4.08479	7.44793	8.37891	4.66495	7.55569	11.3899	8.09243	9.06591	10.4058	1.6534	2.11561	3.19837	0	0.775791	0	1.20719	4.11698	2.11372	0.577689
FBgn0005198	gig	protein_coding	3L	2.12879	0	1.44558	2.57187	1.4897	2.39298	0.784039	4.06446	3.70917	1.22755	2.86429	1.88995	2.15802	1.21752	0	1.9623	4.00463	2.42666	1.14596	4.16859	0.888152	2.55168	0	1.67718	4.18157	1.94272	3.52944	10.212	3.19197	1.67578	1.16624	1.88892	0.569496	2.69748	1.13324	3.90218	1.6534	1.0578	1.59918	2.6905	0	0	1.20719	1.37233	0.704574	2.31076
FBgn0031187	Usp2	protein_coding	X	345.929	113.884	195.153	153.455	43.2013	49.4549	22.7371	53.5154	43.2737	53.3985	35.8036	34.0191	320.466	399.346	342.032	208.004	70.081	135.893	131.786	72.2555	100.361	188.824	87.2996	169.395	39.0279	34.9689	55.5887	34.7207	30.8557	18.4336	18.6598	30.2228	212.991	205.683	243.646	201.612	128.965	103.665	179.109	121.073	82.2338	160.706	138.827	112.531	52.8431	56.6136
FBgn0085481	CG34452	protein_coding	3L	2.12879	1.53897	0	0	0	0	0.784039	0	0	0	0	0	0	0	0	0	0	0	0	1.38953	0	1.27584	0	0	0	0.971359	0	1.0212	0	0	0	0	0	0	0	0	0	0	0	0	0	0	0	0	0	0.577689
FBgn0266631	lncRNA:CR45138	ncRNA	2R	0	0	0	0	0	0	0	0	0	0	0	0	0	0	0	0	0	0	0	0	0	0	0	0	0	0	0	0	0	0	0	0	0	0	0	0	0	0	0	0	0	0	0	0	0	0
FBgn0023510	Rbcn-3B	protein_coding	X	15.966	20.0066	13.0102	20.5749	19.3661	27.1204	15.6808	17.6127	21.0186	25.7786	19.334	19.8445	18.3432	25.5679	15.8348	13.7361	8.67669	11.3244	16.0435	15.2848	14.2104	20.4134	19.1633	8.3859	12.5447	15.5417	9.70596	21.4451	21.2798	25.1367	12.8286	16.0558	36.4477	32.3697	33.9972	16.9094	24.801	30.6763	33.5829	24.2145	17.8432	10.6763	26.5583	17.8403	12.6823	15.5976
FBgn0263542	mir-4954	pre_miRNA	X	0	0	0	0	0.74485	0	0	0	0.618195	2.4551	0.716073	1.88995	1.07901	3.65256	0	1.9623	0	0	0	0	0	1.27584	0	0	1.39386	0.971359	0.88236	0	6.38394	1.67578	0	0	2.84748	4.04622	3.39972	1.30073	0	0	0	0	0	0	0	0	0	0
FBti0059756		transposable_element	3R	0	0	0	0	0	0	0	0	0	0	0	0	0	0	0	0	0	0	0	0	0	0	0	0	0	0	0	0	0	0	0	0	0	0	0	0	0	0	0	0	0	0	0	0	0	0
FBgn0266677	asRNA:CR45167	ncRNA	3L	0	0	0	0	0	0	0	0	0	0	0	0	0	0	0	0	0	0	0	0	0	0	0	0	0	0	0	0	0	0	0	0	0	0	0	0	0	0	1.59918	0	0	0	0	0	0	0
FBgn0034194	CG15611	protein_coding	2R	4.25759	0	1.44558	1.71458	0	0.39883	0	0	1.85459	0	1.43215	0.944975	3.23703	4.87007	3.16697	7.84919	2.00231	0	1.14596	0	0	0	2.12926	0	1.39386	1.94272	0	1.0212	0	3.35157	3.49871	4.72231	5.12546	5.39495	6.79943	5.2029	1.6534	0	0	0	0	0.56191	2.41439	0	0	0
FBgn0037478	CG2656	protein_coding	3R	1.0644	1.53897	0	0.857289	2.23455	4.78595	3.13616	6.77411	9.27293	11.6617	7.16073	9.44975	0	3.65256	1.58348	1.9623	0.667438	0	2.29192	1.38953	0	2.55168	4.25852	0	1.39386	0	1.76472	6.12718	5.31995	3.35157	11.6624	10.3891	2.84748	0.674369	1.13324	3.90218	1.6534	0	0	0	1.55158	1.12382	0	0	4.22744	3.46614
FBgn0267708	lncRNA:CR46041	ncRNA	3R	0	0	0	0	0	0	0	0	0	0	0	0	0	0	0	0	0	0	0	0	0	0	0	0	0	0	0	0	0	0	0	0	0	0	0	0	0	1.0578	0	0	0	0	0	0	0	0
FBgn0034957	Rsph4a	protein_coding	2R	0	0	0	0	0	0	0	0	0	0	0	0	0	0	0	0	0.667438	0	0	0	0	0	0	0	0	0	0	0	0	0	0	0	0	0	0	0	0	0	0	0	0	0.56191	0	0	0	0
FBgn0038428	CG14894	protein_coding	3R	5.32199	9.23381	7.2279	10.2875	1.4897	3.58947	1.56808	6.0967	1.23639	1.84133	2.86429	5.66985	1.07901	2.43504	6.33393	5.8869	26.0301	23.4577	28.649	43.0754	22.2038	12.7584	12.7755	11.7403	15.3324	5.82815	6.17652	5.10599	4.25596	3.35157	1.16624	7.55569	4.55596	6.74369	9.06591	9.10508	18.1874	41.2544	27.1861	26.905	6.98212	7.30483	12.0719	8.23397	9.86404	6.35458
FBgn0015270	Orc2	protein_coding	3R	0	0	0	0	0	0	0	0	0	0	0	0	0	0	1.58348	0	0.667438	0	0	1.38953	0	0	0	0	0	0	0	0	0	0	0	0	0	0.674369	0	0	0	1.0578	0	0	0.775791	0	0	0	0	0
FBgn0260481	CG32454	protein_coding	3L	0	0	0	0	0	0	0	0	0	0	0	0	0	0	0	0	0	0	0	0	0	0	0	0	1.39386	0	0	0	0	0	0	0	0	0	0	0	0	0	0	0	0	0	0	0	0	0
FBgn0038853	RhoGAP93B	protein_coding	3R	3.19319	6.15588	2.89116	2.57187	16.3867	15.1555	12.5446	16.9353	9.89112	9.20664	10.7411	2.83492	4.31604	6.08759	9.5009	0	4.00463	7.27999	5.72981	4.16859	4.44076	3.82752	2.12926	11.7403	4.18157	7.77087	5.29416	10.212	6.38394	13.4063	12.8286	12.278	9.68142	10.7899	4.53295	1.30073	9.92039	2.11561	4.79755	2.6905	4.65475	3.93337	6.03597	10.9786	10.5686	20.2191
FBgn0262947	lncRNA:CR43266	ncRNA	2L	0	0	0	0	0	0	0	0	0	0	0	0	0	0	0	0	0	0	1.14596	0	0	0	0	0	0	0	0	0	0	0	0	0	0	0	0	0	0	0	0	0	0	0	0	0	0	0
FBgn0036493	CG7255	protein_coding	3L	0	0	0	0	0	0	0	0	0	0	0	0	0	0	0	0	0	0	0	0	0	0	0	0	0	0.971359	0	0	0	0	0	0	1.70849	2.69748	7.93267	0	0	0	0	0	0	0	0	0	1.40915	0
FBgn0010621	CCT5	protein_coding	2R	12.7728	1.53897	8.67348	10.2875	22.3455	21.9356	21.9531	29.1287	95.8203	99.4317	88.077	138.911	34.5283	35.308	30.0862	49.0575	0	0.808887	2.29192	0	20.4275	12.7584	10.6463	11.7403	26.4833	26.2267	30.0002	27.5723	117.039	150.82	125.954	186.059	41.5732	42.4853	52.129	55.9312	1.6534	1.0578	0	2.6905	9.30949	8.42866	10.8647	6.86164	31.7058	27.7291
FBgn0038306	Art3	protein_coding	3R	1.0644	1.53897	0	0.857289	2.9794	1.19649	3.13616	7.45152	14.8367	17.1857	18.6179	7.5598	1.07901	2.43504	1.58348	3.9246	0	0	0	5.55812	0	1.27584	2.12926	0	0	0.971359	4.4118	3.06359	25.5358	21.7852	19.826	29.2783	2.27798	1.34874	1.13324	0	3.3068	0	0	0	2.32737	0	1.20719	0	2.11372	4.62152
FBgn0036742	CG7497	protein_coding	3L	6.38638	15.3897	8.67348	12.8593	0	0.39883	0	0.677411	0	0	0	0	0	0	1.58348	0	30.0347	36.3999	30.941	41.6859	7.10522	15.3101	0	0	0	0	0	0	0	0	0	0	0	0	1.13324	1.30073	6.61359	6.34683	25.5869	26.905	15.5158	11.8001	12.0719	10.9786	0	0
FBgn0040099	lectin-28C	protein_coding	2L	0	7.69484	10.1191	0	7.4485	4.78595	14.1127	10.8386	1.85459	0.613776	0	0.944975	0	0	3.16697	0	2.66975	2.42666	1.14596	2.77906	0	2.55168	2.12926	0	18.1201	27.1981	20.2943	22.4663	2.12798	0	4.66495	0.944461	1.70849	2.02311	0	3.90218	1.6534	2.11561	1.59918	5.381	6.20633	1.12382	1.20719	5.48931	11.9778	8.08765
FBgn0034626	CG10795	protein_coding	2R	1.0644	1.53897	10.1191	0	3.72425	4.78595	3.9202	4.06446	2.47278	2.4551	2.86429	6.61482	2.15802	6.08759	4.75045	5.8869	5.3395	3.23555	4.58384	4.16859	7.99337	5.10336	8.51703	10.0631	4.18157	5.82815	6.17652	4.08479	1.06399	0	0	2.83338	0	2.69748	2.26648	2.60145	0	2.11561	1.59918	0	5.43054	5.6191	3.62158	8.23397	6.34117	2.88845
FBgn0036395	CG17361	protein_coding	3L	0	0	0	1.71458	0	0.797659	0.784039	1.35482	1.85459	1.22755	2.14822	0	0	0	0	0	0.667438	0.808887	0	1.38953	0	0	0	0	1.39386	0.971359	0	2.04239	2.12798	0	0	0	0	0	0	0	0	1.0578	0	0	0	0	0	1.37233	2.8183	0
FBgn0265107	lncRNA:CR44209	ncRNA	2R	0	0	0	0	0	0	0	0	0	0	0	0	0	0	0	0	0	0	0	0	0	0	0	0	0	0	0	0	0	0	0	0	0	0	0	0	0	0	0	0	0	0	1.20719	0	0	0
FBgn0034883	Eglp2	protein_coding	2R	0	0	0	0	0	0	0	0	0	0	0	0	0	0	1.58348	0	1.33488	0	0	1.38953	0	1.27584	0	0	0	0	0	0	0	0	0	0	0.569496	0.674369	0	0	0	0	0	2.6905	0.775791	0	0	0	0	0
FBgn0046876	Obp83ef	protein_coding	3R	0	0	0	0	2.9794	0	1.56808	2.03223	1.23639	0	0	0	2.15802	1.21752	0	5.8869	0.667438	0	0	1.38953	0	0	0	0	0	3.88544	4.4118	3.06359	1.06399	1.67578	2.33247	0	0	0.674369	1.13324	0	1.6534	0	1.59918	0	0	0	0	0	2.8183	2.88845
FBgn0266867	lncRNA:CR45328	ncRNA	2R	0	0	0	0	0	0	0	0	0	0	0	0	0	0	0	0	0	0	0	0	0	0	0	0	0	0	0	0	0	0	0	0	0	0	0	0	0	0	0	0	0	0	0	0	0	0
FBgn0034166	CG6472	protein_coding	2R	0	0	0	0	0.74485	0	0	0	0	0	0	0	0	0	0	0	2.00231	4.04444	2.29192	4.16859	0	0	0	0	0	0	0	0	0	0	0	0	0	4.72059	0	0	6.61359	2.11561	3.19837	0	0	0	0	0	0	0
FBgn0030323	Vlet	protein_coding	X	1.0644	1.53897	0	0	1.4897	1.59532	1.56808	0	1.23639	0	0.716073	0	1.07901	1.21752	1.58348	1.9623	0.667438	1.61777	1.14596	0	0	0	0	0	1.39386	0.971359	0.88236	0	1.06399	1.67578	1.16624	0	1.13899	0	0	0	0	2.11561	0	0	1.55158	0	0	0	0.704574	0.577689
FBgn0016131	Cdk4	protein_coding	2R	1.0644	0	2.89116	1.71458	0	1.59532	1.56808	1.35482	1.85459	3.06888	0.716073	1.88995	2.15802	3.65256	3.16697	3.9246	0.667438	0	1.14596	1.38953	2.66446	3.82752	0	5.03154	0	0.971359	0	2.04239	0	0	0	0	0.569496	1.34874	1.13324	0	0	0	0	0	0.775791	0	2.41439	1.37233	0.704574	0
FBgn0263080	CG43348	protein_coding	2L	0	0	0	0	0	0	0	0	0	0	0	0	0	1.21752	0	0	0	0	0	0	0	0	0	0	0	0	0	0	0	0	0	0	0	0	0	0	0	2.11561	0	0	0	0	0	0	0	0
FBgn0025394	inc	protein_coding	X	44.7047	63.0977	33.2483	41.1499	166.846	156.74	167.784	138.869	110.039	103.114	83.0644	101.112	44.2394	48.7007	38.0036	43.1706	20.6906	28.3111	21.7733	31.9592	35.5261	25.5168	36.1974	30.1892	146.355	150.561	127.942	136.84	68.0954	77.086	48.9819	85.0015	37.5867	47.8802	54.3954	48.1268	24.801	31.7341	39.9796	48.429	63.6149	40.4575	25.3511	43.9145	161.347	121.892
FBgn0031466	CG3119	protein_coding	2L	0	0	0	0	0	0	0	0	0	0	0	0	0	0	0	0	0	0	0	0	0	0	0	0	0	0	0	0	0	0	0	0	0	0	0	0	0	0	0	0	0	0	0	0	0	0
FBgn0036439	CG13474	protein_coding	3L	0	0	0	0	0	0	0	0	0	0	0	0	1.07901	0	0	0	0	0	0	0	0	0	0	0	0	0	0	1.0212	0	0	0	0	0	0	0	0	0	0	0	0	0	0	0	0	0	0
FBgn0033160	Dhx15	protein_coding	2R	3.19319	0	5.78232	3.42916	5.21395	12.3637	6.27232	8.80634	12.3639	14.1168	11.4572	11.3397	3.23703	3.65256	3.16697	7.84919	0.667438	0.808887	0	1.38953	0.888152	0	0	0	1.39386	0.971359	0	1.0212	5.31995	6.70313	3.49871	5.66677	1.70849	1.34874	1.13324	0	0	0	0	0	0.775791	0.56191	1.20719	0	0	1.73307
FBgn0004465	Su(P)	protein_coding	3L	25.5455	9.23381	10.1191	12.8593	14.897	13.5602	10.1925	12.8708	27.2006	33.7577	39.384	38.744	45.3184	45.0482	60.1724	56.9067	18.0208	16.9866	22.9192	19.4534	7.10522	12.7584	19.1633	16.7718	18.1201	5.82815	12.353	6.12718	19.1518	18.4336	22.1585	22.6671	26.7663	34.3928	40.7966	32.5181	8.26699	10.578	4.79755	21.524	29.4801	23.6002	18.1079	13.7233	14.0915	10.3984
FBgn0000084	AnxB10	protein_coding	X	1.0644	0	1.44558	0	0.74485	0	0	0	0	0.613776	0	0	1.07901	0	0	0	1.33488	0.808887	0	0	0.888152	0	0	1.67718	1.39386	0	0	1.0212	0	0	0	0.944461	1.13899	1.34874	1.13324	2.60145	1.6534	0	0	0	0	1.12382	1.20719	1.37233	0	0
FBgn0035295	Cnb	protein_coding	3L	1.0644	1.53897	0	0	2.23455	1.19649	0.784039	1.35482	0.618195	1.84133	0	1.88995	0	1.21752	0	1.9623	0.667438	1.61777	0	0	0	0	2.12926	0	0	0.971359	3.52944	0	0	0	0	0	0	1.34874	0	1.30073	0	3.17341	0	0	0	1.12382	1.20719	0	1.40915	2.31076
FBgn0051320	HEATR2	protein_coding	3R	0	0	0	0.857289	0	0.797659	0.784039	1.35482	0	0	0	0	0	0	0	0	0	0.808887	0	0	0	1.27584	0	1.67718	0	2.91408	0.88236	1.0212	4.25596	6.70313	3.49871	0.944461	0.569496	2.69748	1.13324	0	0	0	3.19837	0	2.32737	0.56191	0	0	0.704574	0.577689
FBgn0264467	asRNA:CR43875	ncRNA	3L	0	0	0	0	0	0	0	0	0	0	0	0	0	0	0	0	0	0	0	0	0	0	0	0	0	0	0	0	0	0	0	0	0	0	0	0	0	0	0	0	0	0	0	0	0	0
FBgn0029660	CG10801	protein_coding	X	0	0	0	0	0	0	0.784039	0	0	0	0	0	0	0	0	0	0	0	0	0	0	0	0	0	0	0.971359	0	0	0	0	0	0	0	0	0	0	0	0	0	0	0	0	0	0	0	0
FBgn0051184	LSm3	protein_coding	3R	0	0	2.89116	1.71458	0.74485	2.39298	0.784039	2.70964	4.32737	1.84133	3.58036	2.83492	2.15802	2.43504	0	0	0	0	0	1.38953	0.888152	1.27584	0	0	2.78771	5.82815	3.52944	2.04239	6.38394	8.37891	10.4961	9.44461	1.70849	0.674369	0	1.30073	1.6534	1.0578	0	0	0	0.56191	2.41439	1.37233	2.8183	4.04383
FBti0063095		transposable_element	2R	0	0	0	0	0	0	0	0	0	0	0	0	0	0	0	0	0	0	0	0	0	0	0	0	0	0	0	0	0	0	0	0	0	0	0	0	0	2.11561	0	0	0	0	0	0	0	0
FBti0062533		transposable_element	3R	0	0	0	0	0	0	0	0	0	0	0	0	0	0	0	0	0	0	0	0	0	0	0	0	0	0	0	0	0	0	0	0	0	0	0	0	0	0	0	0	0	0	0	0	0	0
FBgn0036556	hzg	protein_coding	3L	63.8638	50.786	86.7348	94.3018	33.5182	25.5251	25.0893	25.0642	24.1096	17.7995	17.9018	24.5693	32.3703	23.1328	25.3357	19.623	20.0231	21.0311	14.8975	23.622	54.1773	58.6887	44.7144	48.6382	27.8771	23.3126	43.2357	26.5511	29.7917	25.1367	39.652	13.2225	37.5867	23.6029	45.3295	23.4131	13.2272	20.0983	19.1902	21.524	29.4801	35.9623	32.5942	30.1912	28.8875	27.1514
FBgn0034425	CG11906	protein_coding	2R	2.12879	0	1.44558	0.857289	1.4897	1.59532	3.13616	2.03223	0	0.613776	4.29644	0.944975	1.07901	0	3.16697	0	2.00231	1.61777	0	0	2.66446	0	4.25852	1.67718	5.57542	3.88544	5.29416	2.04239	2.12798	3.35157	1.16624	1.88892	0.569496	2.02311	1.13324	2.60145	3.3068	1.0578	1.59918	2.6905	1.55158	3.93337	2.41439	0	0	0.577689
FBgn0053172	CG33172	protein_coding	X	0	0	0	0	0	0	0.784039	0	0	1.22755	2.14822	1.88995	0	1.21752	0	0	0	0	0	0	0	0	0	0	0	0	0	0	0	3.35157	1.16624	1.88892	0.569496	0	0	0	0	0	0	0	0	0	0	0	0	0.577689
FBgn0030234	CG15211	protein_coding	X	39.3827	6.15588	21.6837	11.1448	0.74485	0.39883	0.784039	0	0	0.613776	0	0.944975	80.9258	120.534	98.176	76.5296	2.00231	2.42666	1.14596	1.38953	1.7763	14.0342	4.25852	16.7718	1.39386	0	0.88236	0	1.06399	0	4.66495	0	79.7294	97.7836	95.192	80.645	0	0	9.5951	2.6905	0.775791	0.56191	10.8647	0	2.11372	1.15538
FBgn0085488	CG34459	protein_coding	2R	2.12879	0	0	0	0	0	0	0	0.618195	0.613776	0	0	0	0	0	1.9623	0	0	0	0	1.7763	0	0	0	0	0	0	0	0	0	0	0	0	0	3.39972	0	0	0	0	0	0	0	0	0	0.704574	0
FBgn0038756	CG4783	protein_coding	3R	0	1.53897	0	0	0	0	0.784039	0.677411	0	0.613776	0	0	0	0	0	0	0	0	0	0	0	0	2.12926	0	0	0	0	0	0	0	0	0.944461	0.569496	0	0	0	0	0	0	0	0	0	0	0	0	0.577689
FBgn0037276	CG17387	protein_coding	3R	0	0	0	0	0	0	0	0	0	0	0.716073	0	0	0	0	0	0	0.808887	0	0	0	0	0	0	0	0	0	0	0	0	0	0	0	0	0	0	0	0	0	0	0	0	0	0	0	0
FBgn0039870	CG1896	protein_coding	3R	0	0	2.89116	0	0	0.797659	0	1.35482	0	0	0	0	1.07901	0	0	0	0.667438	2.42666	1.14596	0	0	2.55168	0	0	2.78771	0	0.88236	0	0	1.67578	1.16624	0	0	2.02311	1.13324	1.30073	0	0	1.59918	2.6905	0	0.56191	0	0	1.40915	0
FBgn0032602	ppk17	protein_coding	2L	0	0	0	0	0	1.59532	0	0	0.618195	0	0	0	0	0	0	1.9623	0	0	0	0	0	3.82752	0	0	0	0	0	0	1.06399	1.67578	0	0.944461	4.55596	2.69748	3.39972	1.30073	1.6534	0	0	0	0	0	0	0	0	0.577689
FBgn0003165	pum	protein_coding	3R	14.9016	44.6301	21.6837	36.8634	72.9953	76.1764	78.4039	71.8055	71.7107	82.246	73.0394	83.1578	28.0543	34.0905	28.5027	31.3968	54.7299	46.9155	38.9627	45.8544	40.855	21.6893	31.9389	20.1262	76.662	81.5942	80.2948	64.3354	84.0552	103.899	88.634	102.946	13.6679	18.8823	20.3983	19.5109	100.857	135.399	70.3641	64.5721	20.9464	14.6097	14.4863	27.4466	56.3659	51.4144
FBgn0026430	Grip84	protein_coding	X	0	1.53897	0	2.57187	5.21395	3.19064	4.70424	4.74187	13.6003	9.82041	13.6054	8.50477	1.07901	0	0	7.84919	3.33719	2.42666	1.14596	1.38953	1.7763	0	0	0	0	2.91408	1.76472	3.06359	6.38394	3.35157	10.4961	10.3891	0.569496	3.37185	1.13324	1.30073	4.96019	3.17341	7.99592	2.6905	3.10316	1.12382	1.20719	0	1.40915	1.73307
FBgn0039719	CG15515	protein_coding	3R	0	0	0	0	0	0	0	1.35482	0	0	0	0	0	0	0	0	0	0	0	0	0	0	0	0	0	0	0	0	0	0	0	0	3.41697	1.34874	2.26648	3.90218	0	0	0	0	0	0	0	0	0	0
FBgn0036942	CG7328	protein_coding	3L	0	1.53897	1.44558	0.857289	2.23455	0.797659	0	0.677411	0	0.613776	3.58036	0.944975	0	0	3.16697	0	2.66975	0	2.29192	0	2.66446	2.55168	0	1.67718	1.39386	0.971359	0	2.04239	0	0	2.33247	0.944461	1.13899	2.02311	0	0	0	1.0578	0	0	1.55158	0.56191	1.20719	1.37233	0.704574	0
FBgn0038760	MED25	protein_coding	3R	0	0	0	0.857289	2.23455	3.9883	7.84039	8.12893	1.23639	1.84133	1.43215	0	1.07901	2.43504	3.16697	3.9246	1.33488	3.23555	0	1.38953	0.888152	0	2.12926	1.67718	1.39386	1.94272	7.05888	4.08479	4.25596	0	1.16624	6.61123	2.84748	0	0	1.30073	3.3068	1.0578	0	5.381	2.32737	3.93337	1.20719	1.37233	3.52287	4.62152
FBgn0002781	mod(mdg4)	protein_coding	3R	3.19319	3.07794	5.78232	3.42916	5.9588	12.3637	5.48828	11.516	10.5093	12.8893	10.025	1.88995	0	3.65256	3.16697	0	3.33719	2.42666	4.58384	6.94764	8.88152	2.55168	4.25852	0	11.1508	10.6849	7.94124	9.19078	17.0238	6.70313	12.8286	8.50015	3.98647	2.02311	1.13324	0	6.61359	3.17341	1.59918	0	3.87895	1.12382	0	9.6063	10.5686	4.04383
FBgn0039311	CG10513	protein_coding	3R	0	0	0	0	0	0	0	0.677411	0	0	0	0	0	0	0	0	0	0	0	0	0	0	0	0	0	0	0	0	0	0	0	0	0	0	0	0	0	0	0	0	0	0	0	0	0	0
FBgn0038034	Cyp9f3	protein_coding	3R	0	0	0	0.857289	0	1.19649	1.56808	4.06446	0	0.613776	0.716073	3.7799	1.07901	0	0	0	6.67438	8.08887	17.1894	8.33717	0	1.27584	2.12926	1.67718	0	4.85679	0.88236	0	1.06399	0	0	0.944461	0	0	0	0	9.92039	5.28902	25.5869	8.07151	0.775791	0	0	1.37233	0.704574	4.62152
FBgn0041723	rho-5	protein_coding	2L	0	0	0	0	0	1.19649	0	0	0	0	0	0.944975	0	3.65256	0	0	6.00694	1.61777	2.29192	0	1.7763	0	0	0	0	0	0.88236	0	0	1.67578	0	0.944461	0	0	0	0	3.3068	0	1.59918	5.381	1.55158	2.24764	0	1.37233	0	0
FBgn0053970	CG33970	protein_coding	3R	1.0644	13.8507	1.44558	6.00102	12.6624	13.1614	10.9766	23.032	0	0	0	0	1.07901	2.43504	0	0	0.667438	0	0	1.38953	10.6578	0	2.12926	1.67718	6.96928	5.82815	7.05888	2.04239	0	3.35157	0	0	3.41697	7.41806	9.06591	5.2029	1.6534	1.0578	6.39673	0	2.32737	0	0	4.11698	9.86404	2.88845
FBgn0038332	CG6136	protein_coding	3R	0	0	0	0.857289	1.4897	2.39298	2.35212	0.677411	3.09098	2.4551	0.716073	2.83492	0	0	0	5.8869	1.33488	0	0	0	0	0	0	0	1.39386	1.94272	0.88236	0	1.06399	0	0	0	1.70849	0.674369	0	0	3.3068	0	0	0	0	0	0	0	4.93202	1.15538
FBgn0024957	Irp-1B	protein_coding	3R	8.51518	9.23381	1.44558	7.7156	15.6418	10.3696	15.6808	16.9353	31.528	27.6199	26.4947	23.6244	102.506	71.8336	55.4219	111.851	14.6836	10.5155	9.16769	13.8953	3.55261	8.93088	6.38777	6.70872	11.1508	9.71359	6.17652	8.16958	13.8319	10.0547	10.4961	11.3335	85.9938	80.2499	54.3954	65.0363	4.96019	14.8093	0	61.8815	6.98212	6.18101	10.8647	6.86164	9.86404	12.1315
FBgn0023519	mRpL16	protein_coding	X	5.32199	6.15588	1.44558	1.71458	0	5.98244	7.05635	5.41929	25.346	21.4822	27.2108	37.799	58.2666	52.3533	28.5027	47.0952	7.34182	2.42666	3.43788	8.33717	3.55261	3.82752	2.12926	3.35436	6.96928	10.6849	3.52944	2.04239	24.4718	16.7578	30.3222	23.6115	17.0849	26.9748	21.5315	29.9167	0	7.40463	1.59918	5.381	3.87895	3.93337	6.03597	5.48931	7.75031	1.73307
FBgn0038017	CG4115	protein_coding	3R	4.25759	0	10.1191	6.85831	2.9794	1.19649	1.56808	1.35482	7.41834	1.22755	3.58036	6.61482	84.1628	97.4015	142.514	198.192	54.0625	85.7421	104.282	76.4241	0.888152	1.27584	2.12926	3.35436	1.39386	0.971359	1.76472	1.0212	1.06399	0	5.83118	2.83338	51.2546	72.1575	44.1963	44.2247	19.8408	24.3295	41.5788	64.5721	0	1.68573	3.62158	0	0.704574	0.577689
FBgn0267671	lncRNA:CR46007	ncRNA	3R	0	0	0	0	0	0	0	0	0	0	0	0	0	0	0	0	0	0	0	0	0	0	0	0	0	0	0	0	0	0	0	0.944461	0	0	0	0	0	0	0	0	0	0	0	0	0	0
FBgn0023212	EloB	protein_coding	3R	41.5115	20.0066	15.9014	20.5749	25.3249	12.3637	15.6808	18.9675	25.346	26.3924	28.6429	28.3492	41.0024	45.0482	38.0036	52.9821	21.358	17.7955	17.1894	31.9592	11.546	19.1376	19.1633	16.7718	19.514	16.5131	11.4707	10.212	18.0878	26.8125	13.9948	20.7782	24.4883	19.5567	26.0645	33.8189	9.92039	19.0405	20.7894	13.4525	3.10316	6.18101	13.2791	6.86164	11.9778	15.0199
FBgn0086057	snoRNA:Me28S-G2017	snoRNA	3R	0	0	0	0	0	0	0.784039	0	0	0	0.716073	0	0	0	1.58348	0	0	0	0	0	0	1.27584	0	0	0	0	0	0	0	3.35157	0	0.944461	0	0	0	0	0	0	0	0	0	0	0	0	1.40915	0
FBgn0263400	CG43446	protein_coding	3R	0	0	0	0	0	0	0	0	0	0.613776	0	0	0	0	0	0	0	0	0	0	0	0	0	0	0	0	0	0	0	0	0	0	0	0	0	0	0	0	0	0	0	0	0	0	0	0
FBgn0036480	Cep135	protein_coding	3L	0	0	0	0	0	0.797659	1.56808	1.35482	0	0	0	0	0	0	0	0	0	0	0	0	0.888152	1.27584	0	0	0	0	0	1.0212	0	0	0	1.88892	0	0	0	0	0	0	0	0	0	0	0	0	0	0.577689
FBti0061713		transposable_element	3R	0	0	0	0	0	0	0	0	0	0	0	0	0	0	0	0	0	0	0	0	0	0	0	0	0	0	0	0	0	0	0	0	0	0	0	0	0	0	0	0	0	0	0	0	0	0
FBgn0264956	lncRNA:CR44125	ncRNA	2R	0	0	0	0	0	0	0.784039	0	0	0	0	0	0	0	0	0	0	0	0	0	0	0	0	0	0	0	0	0	0	0	0	0	0	0	0	0	0	0	0	0	0	0	0	0	0	0
FBgn0035308	CG15822	protein_coding	3L	11.7084	23.0845	10.1191	15.4312	3.72425	3.58947	0.784039	0	7.41834	6.13776	7.16073	10.3947	2.15802	0	3.16697	0	21.358	29.9288	20.6273	5.55812	12.4341	19.1376	6.38777	11.7403	0	0	0	0	8.51192	3.35157	13.9948	4.72231	2.27798	2.69748	0	2.60145	13.2272	14.8093	19.1902	5.381	6.20633	13.4858	20.5223	16.4679	1.40915	0
FBgn0035539	slow	protein_coding	3L	0	9.23381	1.44558	5.14373	21.6006	35.097	31.3616	27.7738	109.421	76.722	97.3859	90.7176	0	0	6.33393	1.9623	310.359	286.346	218.879	309.865	15.0986	6.3792	6.38777	6.70872	15.3324	13.599	15.0001	16.3392	26.5998	18.4336	17.4936	25.5005	0	0	2.26648	0	340.6	421.006	275.06	312.098	92.3191	2.80955	8.45036	101.552	21.1372	20.7968
FBgn0032305	CG6700	protein_coding	2L	15.966	15.3897	17.347	24.0041	26.0697	24.3286	28.2254	27.7738	15.4549	15.3444	29.359	16.0646	17.2642	17.0453	15.8348	15.6984	15.3511	14.56	3.43788	16.6743	20.4275	15.3101	34.0681	16.7718	41.8157	25.2553	30.8826	22.4663	17.0238	26.8125	19.826	17.9448	24.4883	18.8823	21.5315	18.2102	18.1874	20.0983	7.99592	13.4525	18.619	25.8479	37.423	15.0956	19.0235	14.4422
FBgn0053080	CG33080	protein_coding	X	1.0644	0	0	0	2.23455	2.79181	0.784039	3.38705	0	0	0	0.944975	2.15802	0	0	0	0	0	1.14596	2.77906	0.888152	1.27584	2.12926	0	2.78771	0.971359	3.52944	3.06359	0	0	0	0	0	0	0	0	0	2.11561	1.59918	0	0.775791	0	0	0	1.40915	3.46614
FBgn0026873	MED18	protein_coding	X	1.0644	1.53897	2.89116	1.71458	4.4691	4.38712	4.70424	2.70964	2.47278	1.84133	2.86429	0.944975	3.23703	1.21752	3.16697	3.9246	0	1.61777	1.14596	1.38953	2.66446	2.55168	6.38777	1.67718	2.78771	1.94272	4.4118	5.10599	5.31995	8.37891	4.66495	5.66677	4.55596	5.39495	4.53295	7.80435	1.6534	0	1.59918	2.6905	0.775791	2.80955	3.62158	0	2.8183	3.46614
FBgn0012051	CalpA	protein_coding	2R	30.8675	6.15588	13.0102	10.2875	2.23455	1.99415	3.9202	2.03223	4.32737	6.75153	1.43215	9.44975	18.3432	12.1752	14.2514	15.6984	10.0116	9.70665	18.3354	12.5058	6.21706	17.8618	14.9048	15.0946	1.39386	5.82815	2.64708	3.06359	9.57591	10.0547	5.83118	4.72231	27.3358	23.6029	32.8639	20.8116	13.2272	12.6937	19.1902	16.143	6.20633	12.362	4.82878	5.48931	3.52287	1.15538
FBgn0027492	wdb	protein_coding	3R	70.2502	53.8639	47.7041	47.1509	93.851	119.25	101.141	84.6763	102.62	95.749	103.114	71.8181	125.165	104.707	71.2568	78.4919	55.3974	55.8132	69.9036	50.023	41.7432	62.5162	27.6804	40.2523	80.8436	92.2791	75.883	110.289	74.4793	93.8438	85.1353	60.4455	114.469	122.061	108.791	97.5544	38.0281	52.8902	47.9755	45.7385	31.0316	48.8862	38.6302	21.9572	81.7306	106.873
FBgn0030114	CG17754	protein_coding	X	44.7047	329.339	96.8539	130.308	2040.14	2180.8	2331.73	2754.35	12.9821	14.1168	19.334	31.1842	3.23703	6.08759	53.8384	5.8869	700.142	431.946	365.562	497.451	267.334	91.8605	138.402	95.5992	1767.41	1936.89	2028.55	2094.48	27.6637	31.8399	36.1533	36.834	1.13899	6.74369	15.8653	11.7065	684.507	597.659	409.391	365.908	282.388	135.982	97.7827	378.763	1708.59	2840.5
FBgn0032136	Apoltp	protein_coding	2L	0	0	0	0.857289	2.23455	1.19649	0	2.03223	1.85459	0	1.43215	0	31.2913	23.1328	33.2532	35.3214	27.365	21.84	12.6056	22.2325	0	0	0	0	0	5.82815	5.29416	1.0212	6.38394	3.35157	8.16366	0.944461	47.2681	31.6954	21.5315	32.5181	6.61359	25.3873	0	56.5005	0	0	0	0	2.8183	2.31076
FBgn0085339	CG34310	protein_coding	2L	0	0	0	0	0	0.39883	0	0	0	0	0.716073	0	0	0	0	0	1.33488	0	0	2.77906	0	1.27584	0	0	0	0	0	0	1.06399	0	2.33247	0	0	0.674369	1.13324	1.30073	0	2.11561	1.59918	0	0	0	0	0	0	0
FBgn0042092	CG13773	protein_coding	2L	2.12879	0	0	0.857289	1.4897	0.39883	1.56808	0	3.70917	7.36531	8.59287	5.66985	2.15802	2.43504	0	0	0.667438	1.61777	0	0	0	0	0	1.67718	0	1.94272	0.88236	0	3.19197	3.35157	5.83118	4.72231	0	0	1.13324	1.30073	0	0	0	0	0.775791	0	0	1.37233	0	2.31076
FBgn0283480	Alp2	protein_coding	2R	0	0	0	0	0	0	0	0	0	0	0	0	0	0	0	0	0	0	0	0	0	0	0	0	0	0	0	0	0	0	0	0	0	0	0	0	0	0	0	0	0	0	0	0	0	0
FBgn0002564	Lsp1gamma	protein_coding	3L	30.8675	3.07794	8.67348	0.857289	2.23455	3.19064	0.784039	0	4.94556	4.91021	4.29644	1.88995	1.07901	4.87007	0	0	1.33488	1.61777	1.14596	2.77906	0	15.3101	6.38777	10.0631	2.78771	2.91408	4.4118	5.10599	0	1.67578	4.66495	2.83338	0.569496	0.674369	1.13324	1.30073	0	0	0	0	5.43054	1.12382	2.41439	5.48931	2.11372	5.1992
FBgn0025637	SkpA	protein_coding	X	44.7047	20.0066	27.466	37.7207	36.4976	44.6689	35.2818	41.3221	29.6734	28.8475	37.2358	37.799	38.8444	46.2657	36.4201	27.4722	21.358	22.6488	32.0869	29.1801	50.6247	45.9303	51.1022	51.9926	111.508	118.506	99.7067	111.311	53.1995	65.3555	64.143	50.0565	99.0922	105.202	88.3926	126.17	29.7612	41.2544	62.3682	53.81	47.3232	39.8956	77.2604	39.7975	85.958	86.0757
FBgn0033763	CG8646	protein_coding	2R	0	0	0	1.71458	0.74485	0	0	0	0	0.613776	0	0.944975	0	0	0	0	0	0	0	0	0	0	0	0	1.39386	0	0	1.0212	0	1.67578	1.16624	0.944461	0.569496	0	0	0	1.6534	0	1.59918	0	0	0	0	0	0	0
FBti0061200		transposable_element	2R	0	0	0	0	0	0	0	0	0	0	0	0	0	0	0	0	0	0	0	0	0	0	0	0	0	0	0	0	0	0	0	0	1.13899	0.674369	0	0	0	0	0	0	0	0	0	0	0	0
FBgn0011289	TfIIA-L	protein_coding	3R	13.8372	38.4742	31.8028	18.8604	17.1315	19.1438	14.1127	16.9353	13.6003	15.3444	17.1857	22.6794	18.3432	21.9153	19.0018	19.623	28.6998	28.3111	16.0435	30.5696	37.3024	22.9651	57.49	30.1892	16.7263	14.5704	16.7648	31.6571	18.0878	18.4336	25.6572	25.5005	19.9323	13.4874	35.1304	20.8116	24.801	14.8093	22.3886	32.286	43.4443	35.4004	30.1798	41.1698	28.183	27.1514
FBgn0025615	Torsin	protein_coding	X	1.0644	4.61691	2.89116	1.71458	5.21395	3.58947	3.9202	2.03223	1.85459	1.84133	4.29644	0.944975	4.31604	1.21752	1.58348	0	10.0116	7.27999	6.87577	13.8953	2.66446	2.55168	4.25852	3.35436	15.3324	18.4558	7.94124	14.2968	6.38394	0	2.33247	4.72231	0.569496	2.02311	1.13324	0	8.26699	10.578	6.39673	8.07151	2.32737	3.37146	1.20719	5.48931	13.3869	10.3984
FBgn0032293	Dpy-30L1	protein_coding	2L	3.19319	0	2.89116	5.14373	3.72425	1.99415	3.9202	2.70964	4.32737	3.68265	3.58036	3.7799	0	2.43504	0	0	2.00231	6.4711	2.29192	4.16859	3.55261	0	2.12926	5.03154	2.78771	5.82815	4.4118	3.06359	3.19197	1.67578	2.33247	4.72231	1.70849	0	4.53295	1.30073	0	1.0578	0	0	3.10316	3.37146	4.82878	0	2.11372	3.46614
FBgn0032053	mRpL51	protein_coding	2L	1.0644	0	0	0	0.74485	1.99415	0.784039	1.35482	4.94556	3.06888	3.58036	0	2.15802	4.87007	3.16697	5.8869	0.667438	0.808887	0	1.38953	0	0	0	0	0	0.971359	2.64708	1.0212	5.31995	3.35157	0	4.72231	7.97294	6.06932	2.26648	5.2029	0	1.0578	0	5.381	0.775791	1.68573	0	1.37233	3.52287	0
FBgn0052686	CG32686	protein_coding	X	0	0	0	0	0	0	0	0	0	0	0.716073	0	1.07901	0	0	0	0.667438	0	2.29192	1.38953	0	0	0	0	0	0.971359	0	0	0	0	0	0.944461	0	0	0	0	3.3068	1.0578	0	0	0	0.56191	0	0	0	0
FBgn0263986	cd	protein_coding	3R	0	0	0	0	0	0	0	0	0	0	0	0	0	0	0	0	0	0	0	0	0	0	0	0	0	0.971359	0	1.0212	0	0	0	0	0	0	0	0	0	0	0	0	0	0	0	0	0	0
FBgn0015269	Nf1	protein_coding	3R	15.966	12.3118	14.4558	10.2875	6.70365	9.17308	9.40847	9.48375	8.65473	20.2546	13.6054	16.0646	4.31604	8.52263	7.91742	3.9246	6.00694	9.70665	2.29192	12.5058	8.88152	11.4826	17.0341	15.0946	13.9386	13.599	12.353	13.2756	20.2158	11.7305	15.1611	16.0558	6.83395	3.37185	11.3324	2.60145	0	8.46244	9.5951	5.381	17.8432	16.8573	9.65755	10.9786	4.22744	4.04383
FBgn0023167	SmD3	protein_coding	2R	4.25759	4.61691	2.89116	0	2.9794	0.797659	3.9202	2.70964	7.41834	3.68265	7.16073	3.7799	3.23703	2.43504	0	0	0.667438	1.61777	0	0	0.888152	1.27584	6.38777	0	4.18157	0.971359	4.4118	6.12718	9.57591	0	0	2.83338	1.13899	0.674369	0	0	0	1.0578	0	0	0	1.12382	0	0	2.11372	2.88845
FBgn0052574	Twdlalpha	protein_coding	X	0	0	0	0	0	0.39883	0	0	0	0	0	0	0	0	1.58348	0	0	0	0	0	0	0	0	0	0	0	0.88236	0	0	0	0	0	0	0	0	0	0	0	0	0	0	0.56191	0	0	0	0
FBgn0038485	CG5255	protein_coding	3R	0	0	0	0	0	0	0	0	0	0	0	0	0	0	0	0	0	0	0	0	0	0	0	0	0	0	0	0	0	0	0	0	0	0	0	0	0	0	0	0	0	0	0	0	0	0
FBgn0036827	CG6843	protein_coding	3L	2.12879	1.53897	5.78232	1.71458	3.72425	6.38127	3.9202	6.77411	3.70917	5.52398	3.58036	1.88995	1.07901	1.21752	0	1.9623	2.00231	0.808887	0	1.38953	2.66446	1.27584	2.12926	0	4.18157	8.74223	7.05888	5.10599	3.19197	8.37891	5.83118	5.66677	3.41697	3.37185	2.26648	2.60145	0	1.0578	0	0	3.10316	2.24764	2.41439	5.48931	7.75031	7.50996
FBgn0041100	park	protein_coding	3L	0	0	0	0	0.74485	0	0	0	0.618195	0	1.43215	0	0	0	0	1.9623	0	0	0	1.38953	0	0	0	1.67718	0	0	0	0	0	0	0	0	0	0	0	0	0	0	0	0	0	0	0	0	0	0
FBgn0063667	CG32335	protein_coding	3L	0	0	0	0	0	0	0	0	0	0	0	0	0	0	0	0	0	0	0	0	0	0	0	0	0	0	0	0	0	0	0	0	0	0	0	0	0	0	0	0	0	0	0	0	0	0
FBgn0024734	PRL-1	protein_coding	2L	0	0	0	0	0	0	0	0	0	0	0	1.88995	0	0	0	1.9623	0	0	1.14596	0	0	0	0	0	0	0.971359	0	0	0	0	1.16624	0	0	0.674369	1.13324	0	0	0	1.59918	0	0	0	0	0	0	0
FBgn0263001	CR43309	pseudogene	3L	0	0	0	0	0	0	0	0	0.618195	0	0.716073	0	0	1.21752	1.58348	0	0	0	0	0	0	0	0	0	1.39386	0.971359	0	0	1.06399	0	0	0	1.70849	0.674369	2.26648	1.30073	0	0	0	0	0	0	0	0	0	0
FBgn0053120	CG33120	protein_coding	2L	0	0	0	0	0.74485	0	0	0	0	0.613776	0	0	8.63208	14.6102	0	1.9623	2.00231	0	1.14596	0	0	0	0	0	4.18157	0	1.76472	0	0	0	1.16624	0	1.70849	4.72059	3.39972	5.2029	0	1.0578	0	0	0	0	0	0	0	0
FBti0062674		transposable_element	3L	0	0	0	0	1.4897	0	0	0	0	0	0	0	0	0	0	0	0	0	0	0	0	0	0	0	0	0	0	0	0	0	0	0	0	0	0	0	0	0	0	0	0	0	0	0	0	0
FBti0019098		transposable_element	2L	0	0	0	0	0	0	0	0	0	0	0	0	0	0	0	0	0	0	0	0	0	0	0	0	0	0	0	0	0	0	0	0	0	0	0	0	0	0	0	0	0	0	0	0	0	0.577689
FBgn0010399	Nmdar1	protein_coding	3R	0	0	0	0	0	0	0	0	0	0	0	0	0	0	0	0	0	0	0	0	0	0	0	0	0	0	0	0	0	0	1.16624	0	0	0	0	0	0	0	0	0	0	0	0	0	0	0
FBgn0001150	gt	protein_coding	X	0	0	0	0	0.74485	0	0	0	4.32737	1.22755	2.14822	4.72487	1.07901	1.21752	0	0	0	0	0	0	0	0	0	0	0	0	0	0	1.06399	0	1.16624	0	0.569496	0.674369	0	0	0	0	0	0	0	0	0	0	0	0
FBgn0264703	CR43972	pseudogene	3L	0	0	0	0	0	0	0	0.677411	0.618195	0	0	0	0	0	0	0	0	0	0	0	0	0	0	0	0	0	0	2.04239	0	0	1.16624	0	0	0	0	0	0	0	0	0	0	0	0	0	0	0
FBgn0032780	CG13085	protein_coding	2L	4.25759	4.61691	2.89116	2.57187	1.4897	1.19649	0	0	0.618195	1.22755	0	0	1.07901	1.21752	0	0	0	0	1.14596	0	2.66446	5.10336	0	0	0	1.94272	1.76472	1.0212	2.12798	0	1.16624	0.944461	1.13899	0	1.13324	1.30073	0	0	0	2.6905	4.65475	3.93337	2.41439	1.37233	2.11372	0.577689
FBgn0031047	Rcd-1	protein_coding	X	15.966	4.61691	4.33674	5.14373	16.3867	11.5661	13.3287	18.2901	24.7278	28.2337	25.7786	18.8995	22.6592	25.5679	26.9192	17.6607	5.3395	10.5155	9.16769	11.1162	7.99337	12.7584	8.51703	6.70872	25.0894	22.3413	19.4119	25.5299	19.1518	25.1367	15.1611	21.7226	35.8782	23.6029	13.5989	39.0218	3.3068	7.40463	3.19837	8.07151	7.75791	4.49528	9.65755	5.48931	11.9778	13.8645
FBgn0262636	dati	protein_coding	4	0	0	0	0	0	0	0	0	0	0	0	0	0	0	0	0	0	0	0	0	0	0	0	0	0	0	0	0	0	0	0	0	0	0	0	0	0	0	0	0	0	0	0	0	0	0
FBgn0266750	lncRNA:CR45223	ncRNA	3R	0	0	0	0	0	0	0	0	0.618195	2.4551	1.43215	0.944975	0	0	0	0	0	0	0	0	0.888152	0	0	0	0	0	0.88236	2.04239	1.06399	1.67578	3.49871	0	0	0	0	0	0	0	1.59918	0	0	0.56191	0	0	0	0.577689
FBgn0036038	defl	protein_coding	3L	0	0	1.44558	0	4.4691	4.38712	3.13616	3.38705	4.32737	0.613776	0.716073	0.944975	0	1.21752	0	0	2.00231	0.808887	1.14596	0	0	0	0	0	1.39386	5.82815	1.76472	1.0212	4.25596	0	3.49871	3.77785	0.569496	0	0	0	3.3068	1.0578	3.19837	0	0	0	1.20719	0	0.704574	1.73307
FBgn0263072	CG43347	protein_coding	X	0	0	0	0	0	0	0	0	0	0	0	0.944975	0	0	0	0	0	0.808887	0	0	0	0	0	0	0	0	0	0	0	0	0	0	0	0	0	0	0	0	0	0	0	0	0	0	0	0
FBgn0029881	pigs	protein_coding	X	3.19319	7.69484	8.67348	6.85831	87.1474	148.365	128.582	117.192	5.56376	5.52398	6.44466	5.66985	61.5036	71.8336	53.8384	39.246	11.3464	17.7955	4.58384	11.1162	8.88152	5.10336	4.25852	11.7403	104.539	122.391	101.471	98.0349	13.8319	11.7305	26.8234	18.8892	100.801	110.597	89.5258	75.4421	28.1078	13.7515	17.591	16.143	4.65475	11.2382	4.82878	8.23397	88.7763	130.558
FBgn0262945	lncRNA:CR43264	ncRNA	X	0	0	0	0.857289	0	0	0	0	0.618195	0.613776	1.43215	1.88995	0	0	0	1.9623	0.667438	0	1.14596	1.38953	0	1.27584	0	0	0	0	0	0	1.06399	0	2.33247	2.83338	0	0.674369	0	0	0	0	0	0	0.775791	0.56191	0	0	0.704574	0
FBgn0039054	Cow	protein_coding	3R	0	0	0	0	0	0	0	0.677411	0	0	0	0	0	0	0	0	0.667438	0	0	0	0	0	0	0	0	0	0	0	0	0	0	0	0	0	0	0	0	0	0	0	0	0.56191	0	0	0	0
FBgn0029693	CG6379	protein_coding	X	1.0644	0	2.89116	3.42916	14.1521	9.57191	10.1925	12.8708	16.0731	18.4133	11.4572	16.0646	4.31604	2.43504	4.75045	7.84919	4.67207	0.808887	3.43788	2.77906	4.44076	3.82752	12.7755	1.67718	16.7263	8.74223	6.17652	10.212	7.44793	6.70313	12.8286	4.72231	5.69496	7.41806	5.66619	13.0073	1.6534	1.0578	0	5.381	6.20633	1.68573	3.62158	1.37233	10.5686	10.9761
FBgn0028567	robl62A	protein_coding	3L	0	0	0	0	0	0	0	0	0	0	0	0	0	0	0	0	0	0	0	0	0	0	0	0	0	0	0	0	1.06399	0	0	0	0	0	0	0	0	0	0	0	0	0	0	0	0	0.577689
FBgn0020621	Pkn	protein_coding	2R	1.0644	13.8507	13.0102	11.1448	0.74485	0	0.784039	0	0	0.613776	0	0.944975	0	0	0	0	1.33488	4.04444	0	0	8.88152	6.3792	4.25852	1.67718	0	0.971359	0	0	0	0	0	0	0.569496	0	1.13324	0	3.3068	1.0578	0	0	7.75791	8.42866	12.0719	8.23397	0	0.577689
FBgn0032175	CG13131	protein_coding	2L	0	0	0	0	0	0	0	0	0	0	0	0	0	0	0	0	0	0	0	0	0	0	0	0	0	0	0	0	0	0	0	0	0	0	0	0	0	0	0	0	0	0	0	0	0	0.577689
FBgn0260954	CG42586	protein_coding	2L	0	0	0	0	0	0	0	0	0	0	0	0	0	0	0	0	0	0	0	0	0	0	0	0	0	0.971359	0	0	0	0	0	0	0	0	0	0	0	0	0	0	0	0	0	0	0	0
FBgn0026088	CG14818	protein_coding	X	18.0948	9.23381	24.5749	17.1458	3.72425	3.58947	1.56808	2.70964	1.85459	1.22755	5.01251	2.83492	5.39505	4.87007	6.33393	0	5.3395	5.66221	14.8975	18.0639	15.9867	16.5859	10.6463	23.4805	8.36313	11.6563	7.05888	12.2544	8.51192	8.37891	6.99742	2.83338	8.54243	8.7668	11.3324	11.7065	14.8806	8.46244	11.1943	5.381	15.5158	18.543	60.3597	15.0956	12.6823	10.3984
FBgn0053156	CG33156	protein_coding	2R	1.0644	0	1.44558	0	2.23455	0.797659	1.56808	3.38705	1.23639	0.613776	2.86429	0.944975	0	3.65256	0	5.8869	0.667438	0	1.14596	0	0	1.27584	2.12926	0	0	1.94272	1.76472	3.06359	3.19197	5.02735	1.16624	0	2.84748	1.34874	0	1.30073	0	1.0578	0	0	1.55158	1.68573	1.20719	0	0.704574	1.15538
FBti0062977		transposable_element	X	0	0	0	0	0	0	0	0	0	0	0	0	0	0	0	0	0	0	0	0	0	0	0	0	0	0	0	0	0	0	0	1.88892	0	0	0	0	0	0	0	0	0	0	0	0	0	0
FBgn0035917	Zasp66	protein_coding	3L	4667.38	5127.84	5055.19	4070.41	404.453	350.97	429.654	406.446	2.47278	9.20664	6.44466	85.0477	2441.8	2570.18	2498.74	1877.92	4359.04	4812.88	5683.97	4846.68	5780.09	5589.46	5335.92	5415.61	617.478	481.794	554.122	559.616	9.57591	13.4063	15.1611	66.1123	2243.81	2585.53	2332.2	2252.86	9110.22	7426.84	9771.01	7697.53	4768.79	5148.78	5958.71	5203.87	488.27	764.283
FBti0019579		transposable_element	X	0	0	0	0	0	0	0	0	0	0	0	0	0	1.21752	0	0	0	0	0	0	0	1.27584	0	0	0	0	0	0	0	0	0	0	0	0.674369	0	0	0	1.0578	0	2.6905	0	0	1.20719	0	0	0
FBgn0286828	dind	protein_coding	3R	3.19319	1.53897	1.44558	2.57187	1.4897	3.9883	1.56808	3.38705	1.23639	1.84133	5.72858	3.7799	3.23703	4.87007	3.16697	0	0.667438	2.42666	2.29192	2.77906	4.44076	2.55168	0	3.35436	2.78771	4.85679	4.4118	6.12718	8.51192	3.35157	4.66495	1.88892	2.84748	4.04622	5.66619	0	6.61359	0	0	0	3.87895	2.80955	2.41439	2.74466	4.22744	8.66534
FBgn0037143	CR7448	pseudogene	3L	0	0	0	0	0.74485	0	0	0	0	0	0	0	0	0	0	0	0	0	0	0	0	0	0	0	0	0	0	0	0	0	0	0	0	0	0	0	0	0	0	0	0	0	0	0	0	0
FBgn0031459	HINT1	protein_coding	2L	14.9016	9.23381	8.67348	9.43018	9.68304	12.3637	10.1925	6.77411	29.6734	22.7097	22.1983	34.9641	20.5012	19.4803	20.5853	23.5476	0.667438	3.23555	3.43788	6.94764	7.10522	19.1376	19.1633	21.8033	19.514	8.74223	14.1178	9.19078	25.5358	18.4336	22.1585	31.1672	27.9053	28.3235	33.9972	37.721	6.61359	6.34683	0	8.07151	13.9642	14.0478	15.6935	9.6063	13.3869	15.5976
FBti0060284		transposable_element	2L	0	0	0	0.857289	0	0	0	0	0	0	0	0	0	0	0	0	0	0	0	0	0	0	0	0	0	0	0	0	0	0	0	0	0	0	0	0	0	0	0	0	0	0	0	0	0	0
FBgn0000662	fl(2)d	protein_coding	2R	4.25759	10.7728	7.2279	7.7156	5.21395	13.1614	7.84039	10.8386	9.89112	15.9582	12.1732	25.5143	12.9481	7.30511	3.16697	11.7738	6.67438	10.5155	3.43788	1.38953	7.99337	12.7584	14.9048	5.03154	12.5447	10.6849	9.70596	13.2756	22.3438	28.4883	19.826	16.0558	10.2509	15.5105	5.66619	9.10508	11.5738	14.8093	6.39673	5.381	4.65475	3.37146	7.24316	1.37233	9.15946	9.82072
FBgn0263649	lncRNA:CR43640	ncRNA	2L	0	0	0	0	0	0	0	0	0	0	0	0	0	0	0	0	0	0	0	0	0	0	0	0	0	0.971359	0	0	0	0	0	0	0	0	0	0	0	0	0	0	0	0	0	0	0	0.577689
FBgn0003655	swa	protein_coding	X	0	0	0	0	0	0	0	0	0	0	0	0	0	0	0	0	0	0	1.14596	0	0	0	0	0	0	0	0	0	0	0	0	0	0	0	0	0	0	0	0	0	0	0	0	0	0	0
FBgn0264554	asRNA:CR43933	ncRNA	3L	1.0644	7.69484	1.44558	6.85831	5.9588	2.79181	6.27232	4.74187	0.618195	2.4551	0.716073	0.944975	7.55307	3.65256	4.75045	7.84919	4.67207	1.61777	3.43788	5.55812	6.21706	2.55168	10.6463	5.03154	9.75699	3.88544	5.29416	3.06359	6.38394	0	1.16624	2.83338	1.13899	0.674369	4.53295	2.60145	1.6534	3.17341	3.19837	0	10.8611	5.6191	2.41439	5.48931	9.86404	8.08765
FBgn0033166	Eaf	protein_coding	2R	19.1592	20.0066	21.6837	24.8614	8.93819	13.959	9.40847	14.903	26.5824	41.7368	32.2233	36.854	26.9753	25.5679	17.4183	19.623	10.679	18.6044	9.16769	5.55812	16.8749	16.5859	12.7755	21.8033	16.7263	12.6277	13.2354	12.2544	17.0238	28.4883	13.9948	39.6674	29.0443	19.5567	20.3983	19.5109	9.92039	9.52024	17.591	13.4525	20.1706	24.7241	27.7655	9.6063	9.15946	9.24303
FBgn0033137	Tsp42Ep	protein_coding	2R	1.0644	0	0	0	0	0	0	0.677411	0	0	0	0	0	0	0	0	0	0	0	0	0	0	0	0	0	0	0	0	0	0	0	0	0.569496	0	0	0	0	1.0578	0	0	0	0.56191	1.20719	0	0.704574	0
FBgn0033072	CG17994	protein_coding	2R	0	0	0	0	0	0	0	0	0	0	0	0	0	0	0	0	0	0	0	0	0	0	0	0	0	0	0	0	0	0	0	0	0	0	0	0	0	0	0	0	0	0	0	0	0	0
FBgn0023081	gek	protein_coding	2R	15.966	10.7728	14.4558	13.7166	16.3867	23.9298	19.601	18.2901	17.3095	20.8684	15.7536	23.6244	4.31604	8.52263	11.0844	13.7361	11.3464	4.04444	12.6056	5.55812	9.76967	14.0342	19.1633	18.449	19.514	26.2267	23.8237	29.6147	12.7679	31.8399	13.9948	21.7226	16.5154	17.5336	15.8653	18.2102	9.92039	22.2139	11.1943	10.762	18.619	10.6763	13.2791	30.1912	15.5006	27.7291
FBgn0028734	Fmr1	protein_coding	3R	27.6743	16.9287	13.0102	38.578	59.588	53.842	54.0987	41.3221	79.129	131.348	102.398	98.2774	37.7654	43.8307	22.1688	13.7361	4.67207	3.23555	0	4.16859	37.3024	28.0685	17.0341	23.4805	34.8464	55.3675	37.9415	58.2083	61.7114	107.25	57.1456	49.112	30.7528	27.6491	13.5989	15.6087	4.96019	2.11561	0	5.381	39.5653	29.7812	18.1079	45.2868	20.4326	49.6813
FBgn0265297	pAbp	protein_coding	2R	946.249	603.276	543.538	584.671	1605.15	1656.34	1641.78	1459.82	1513.34	1955.49	1599.71	1457.15	1342.29	1649.74	1402.97	937.979	852.986	917.278	868.639	935.153	746.936	813.986	619.614	895.614	1609.9	1639.65	1800.9	1744.21	1623.65	2032.72	2029.25	1618.81	1731.27	1662.99	1625.06	1396.98	1483.1	1185.8	1172.2	990.105	707.521	620.911	551.688	621.665	2051.02	1997.07
FBgn0001992	Cyp303a1	protein_coding	2L	0	0	0	0	0.74485	0	0	0	1.23639	0	0	0	0	0	0	0	0	0	0	0	0	0	0	0	0	0.971359	0	0	1.06399	0	1.16624	0	0	0.674369	1.13324	0	0	0	0	0	0	0	0	0	0	0
FBgn0015772	Nak	protein_coding	2L	17.0304	7.69484	11.5646	18.8604	12.6624	10.3696	16.4648	14.903	10.5093	14.7306	12.1732	11.3397	9.71109	8.52263	6.33393	9.81149	8.00926	10.5155	8.02173	16.6743	14.2104	28.0685	29.8096	21.8033	12.5447	7.77087	12.353	17.3604	5.31995	15.082	13.9948	13.2225	14.8069	12.813	7.93267	20.8116	11.5738	7.40463	9.5951	8.07151	10.0853	19.6669	18.1079	21.9572	4.22744	19.0637
FBgn0039789	CG9717	protein_coding	3R	0	3.07794	0	0.857289	0	3.58947	0	1.35482	0	0.613776	0	0	0	0	0	0	0	1.61777	0	2.77906	0	3.82752	2.12926	0	1.39386	0.971359	1.76472	0	0	0	0	0	0	0	0	0	0	0	0	0	0	0	0	0	0.704574	2.31076
FBgn0037988	CG14740	protein_coding	3R	0	0	0	0	0	0	0	0	0	0	0	0	1.07901	0	0	0	0	0	0	0	0	0	0	0	0	0	0	0	0	0	0	0	0	0	0	0	0	0	0	0	0	0	0	0	0	0
FBgn0003891	tud	protein_coding	2R	72.379	56.9418	50.5953	70.2977	77.4644	129.221	105.061	77.9022	137.858	160.195	139.634	177.655	125.165	180.193	155.181	92.228	105.455	104.346	96.2607	65.3079	122.565	108.446	61.7485	90.5677	50.1788	60.2243	79.4124	53.1023	98.9511	154.172	116.624	106.724	158.32	165.22	133.722	110.562	120.698	129.052	102.348	113.001	99.3012	88.7818	79.6748	91.946	60.5934	77.9881
FBgn0037849	CG4596	protein_coding	3R	0	0	0	0	0	0	0	0	0	0	0	0	0	0	0	0	0	0	0	0	0	5.10336	0	0	0	0	0	0	0	0	0	0	0.569496	0	0	0	0	0	0	0	0	2.80955	3.62158	1.37233	0	0
FBgn0266042	asRNA:CR44807	ncRNA	2R	0	0	0	0.857289	0	0	0	0	0	0	0	0	0	0	0	0	0	0	0	0	0	0	0	0	0	0	0	0	0	0	0	0	0	0	0	0	0	0	0	0	0	0	0	0	0	0
FBgn0036617	Cpr72Ea	protein_coding	3L	1.0644	0	0	15.4312	12964.1	13213.6	10535.9	11711.8	4.32737	4.29643	2.14822	23.6244	0	1.21752	159.932	0	0	0.808887	0	0	0	1.27584	0	3.35436	3728.56	2266.18	3640.62	1341.85	10.6399	21.7852	87.4678	16.0558	0.569496	0	13.5989	0	0	0	0	2.6905	0	1.12382	1.20719	10.9786	6059.34	3306.12
FBgn0013733	shot	protein_coding	2R	75.5722	95.4161	70.8334	120.878	102.789	88.1413	79.972	69.0959	90.8747	83.4735	82.3484	76.543	114.375	112.012	161.515	139.323	182.211	203.031	113.45	138.953	87.0389	109.722	78.7825	83.859	72.4805	67.0238	77.6477	65.3566	54.2635	58.6524	54.8131	48.1675	79.1599	79.5756	69.1275	57.2319	219.902	226.37	347.023	231.383	23.2737	35.4004	44.6662	27.4466	73.9803	52.5697
FBgn0036337	AdenoK	protein_coding	3L	5.32199	15.3897	2.89116	2.57187	0.74485	1.19649	2.35212	2.03223	8.65473	7.36531	12.8893	7.5598	32.3703	26.7854	28.5027	39.246	5.3395	4.85332	5.72981	8.33717	4.44076	6.3792	6.38777	6.70872	4.18157	1.94272	2.64708	3.06359	5.31995	15.082	8.16366	23.6115	53.5326	39.1134	50.9957	52.029	0	4.23122	7.99592	13.4525	4.65475	3.37146	4.82878	5.48931	0.704574	4.04383
FBgn0032244	RfC3	protein_coding	2L	0	0	0	0	1.4897	0.797659	0	0.677411	0.618195	0	1.43215	0	0	1.21752	0	0	0	0	1.14596	0	0	0	0	0	0	0.971359	0	1.0212	6.38394	6.70313	1.16624	0.944461	0.569496	0.674369	0	0	0	0	0	2.6905	0	0	0	0	0	0
FBti0020061		transposable_element	3L	0	0	0	0	0	0	0	0	0	0	0	0	0	0	0	0	0.667438	0	0	0	0	0	0	0	0	0	0	0	0	0	0	0	0	0	0	0	0	0	0	0	0	0	0	0	0	0
FBgn0011766	E2f1	protein_coding	3R	184.141	220.073	169.133	224.61	153.439	155.942	147.399	158.514	105.093	122.755	95.2377	96.3874	198.538	248.374	202.686	133.436	21.358	17.7955	17.1894	11.1162	178.519	215.617	200.15	177.781	132.416	117.534	98.8243	141.946	90.4392	100.547	71.1404	73.668	110.482	113.968	108.791	94.953	28.1078	46.5434	27.1861	37.667	151.279	185.992	175.043	100.18	162.757	173.885
FBgn0266348	lncRNA:CR44997	ncRNA	X	0	0	0	0	0	0	0	0	0	0	0	0	0	0	0	0	0	0	0	0	0	0	0	0	0	0	0	0	0	0	0	0	0	0	0	0	0	0	0	0	0	0	0	0	0	0
FBgn0036928	Tom20	protein_coding	3L	4.25759	3.07794	0	2.57187	6.70365	9.57191	3.9202	5.41929	18.5459	15.3444	16.4697	23.6244	15.1061	10.9577	11.0844	15.6984	2.00231	8.08887	5.72981	4.16859	0.888152	5.10336	2.12926	1.67718	13.9386	12.6277	16.7648	15.318	32.9837	30.1641	30.3222	24.556	23.9188	17.5336	19.2651	35.1196	6.61359	5.28902	7.99592	13.4525	2.32737	1.68573	0	2.74466	16.2052	9.24303
FBti0064088		transposable_element	X	0	0	0	0	0	0	0	0	0	0	0	0	0	0	0	0	0	0	0	0	0	0	0	0	0	0	0	0	0	0	0	0	0	0	0	0	0	0	0	0	0	0	0	0	0	0
FBgn0085408	Shrm	protein_coding	2R	12.7728	18.4676	28.9116	24.0041	29.794	36.2935	21.9531	38.6124	0	1.22755	0	0	7.55307	23.1328	9.5009	9.81149	12.0139	4.85332	3.43788	5.55812	41.7432	39.5511	46.8437	62.0556	9.75699	26.2267	31.765	20.4239	3.19197	1.67578	0	0.944461	15.3764	11.4643	14.7321	18.2102	9.92039	2.11561	4.79755	0	12.4127	55.0672	30.1798	21.9572	19.0235	16.1753
FBti0063743		transposable_element	2R	0	0	0	0	0.74485	0.39883	0	0	0	0	0	0	0	0	0	0	0	0	0	0	0	0	0	0	0	0	0	0	0	0	0	0	0	0	0	0	0	1.0578	0	0	0	0	0	0	0	0.577689
FBgn0008636	hbn	protein_coding	2R	0	0	0	0	0	0	0	0	0	0	0	0	0	0	0	0	0	0	0	0	0	0	0	0	0	0	0	0	0	0	0	0	0	0	6.79943	0	0	0	0	0	0	0	0	0	0	0
FBti0063413		transposable_element	4	0	0	0	0	0	0	0	0	0.618195	0	0	0	0	0	0	0	0	0	0	0	0	0	0	0	0	0	0	0	0	0	0	0	0	0	0	0	0	0	0	0	0	0	0	0	0	0
FBgn0035873	CG13670	protein_coding	3L	0	0	0	0	0	0	0	0	0	0	0	0	0	0	0	0	0	0	0	0	0	0	0	0	0	0	0	0	0	0	0	0	0	0	0	0	0	0	0	0	0	0	0	0	0	0
FBgn0004403	RpS14a	protein_coding	X	417.244	292.404	365.732	246.042	83.4232	82.5577	101.925	79.257	302.916	256.558	245.613	310.897	284.859	331.165	356.284	482.725	323.707	377.75	475.574	446.039	452.958	495.026	772.921	581.981	206.291	178.73	210.002	176.667	568.171	464.192	553.962	578.955	420.288	459.92	472.56	720.602	398.469	414.659	490.949	556.934	653.216	704.074	808.82	691.653	414.994	337.948
FBgn0267430	Pzl	protein_coding	3R	0	0	0	0	0	0	0	0	0	0	0	0	0	0	0	0	0	0	0	0	0	0	0	0	0	0	0	0	0	0	0	0	0	0	0	0	0	0	0	0	0	0	0	0	0	0
FBgn0052418	vito	protein_coding	3L	1.0644	3.07794	0	3.42916	3.72425	2.39298	4.70424	6.77411	6.18195	4.29643	5.01251	7.5598	1.07901	2.43504	3.16697	5.8869	8.67669	10.5155	6.87577	6.94764	7.10522	6.3792	10.6463	6.70872	5.57542	5.82815	1.76472	6.12718	5.31995	3.35157	3.49871	12.278	2.27798	1.34874	2.26648	5.2029	13.2272	13.7515	3.19837	8.07151	11.6369	5.05719	3.62158	16.4679	2.8183	2.31076
FBgn0030354	Upf1	protein_coding	X	6.38638	9.23381	10.1191	17.1458	25.3249	19.1438	25.0893	27.7738	24.1096	25.1648	17.9018	19.8445	14.0271	23.1328	19.0018	23.5476	20.0231	32.3555	38.9627	36.1277	15.9867	12.7584	14.9048	11.7403	18.1201	13.599	15.8825	14.2968	15.9599	38.543	15.1611	18.8892	10.2509	12.1386	15.8653	3.90218	51.2553	32.7919	60.769	45.7385	15.5158	10.1144	15.6935	9.6063	11.9778	21.9522
FBgn0010520	Bka	protein_coding	2L	0	0	0	0	0	1.99415	1.56808	0.677411	4.32737	1.22755	7.16073	2.83492	0	0	0	1.9623	0	0	0	1.38953	0	0	2.12926	0	0	0	0.88236	1.0212	6.38394	8.37891	3.49871	1.88892	1.13899	0	2.26648	2.60145	0	0	1.59918	0	1.55158	1.68573	1.20719	0	1.40915	2.31076
FBgn0036837	CG18135	protein_coding	3L	23.4167	41.5522	26.0204	54.8665	41.7116	35.8947	40.7701	39.2898	11.7457	27.0061	15.0375	10.3947	15.1061	8.52263	17.4183	25.5099	222.924	207.075	134.077	232.051	25.7564	7.65504	34.0681	10.0631	55.7542	54.3961	59.1181	58.2083	5.31995	5.02735	5.83118	7.55569	17.6544	11.4643	12.4656	14.308	38.0281	70.8729	55.9714	174.883	29.4801	48.8862	44.6662	35.6805	63.4117	76.255
FBgn0003270	amos	protein_coding	2L	0	0	0	0	0	0	0	0	0	0	0	0	0	0	0	0	0	0	0	0	0	0	0	0	1.39386	0	0	0	0	0	0	0	0	0	0	0	0	0	0	0	0	0	0	0	0	0.577689
FBgn0031610	CG15436	protein_coding	2L	0	0	0	0	0	0.39883	0	0.677411	2.47278	1.22755	0.716073	1.88995	0	0	0	0	0	0	0	0	0	0	0	0	0	0	0	0	0	1.67578	0	1.88892	0	0	2.26648	0	0	1.0578	0	0	0	0	0	0	0	0
FBgn0022069	Nnp-1	protein_coding	2L	2.12879	0	0	0.857289	2.23455	5.58361	9.40847	7.45152	46.9828	66.9016	45.8287	49.1387	9.71109	8.52263	11.0844	17.6607	1.33488	0.808887	0	2.77906	0	1.27584	2.12926	0	15.3324	12.6277	9.70596	12.2544	41.4956	50.2735	32.6546	51.0009	7.97294	5.39495	3.39972	2.60145	0	1.0578	0	2.6905	2.32737	2.80955	3.62158	0	12.6823	8.08765
FBgn0032480	Edem2	protein_coding	2L	6.38638	10.7728	10.1191	9.43018	6.70365	5.98244	7.84039	5.41929	3.09098	1.84133	2.14822	2.83492	2.15802	6.08759	7.91742	5.8869	22.6929	12.1333	18.3354	25.0115	6.21706	6.3792	0	0	5.57542	1.94272	10.5883	3.06359	3.19197	3.35157	5.83118	2.83338	5.69496	7.41806	4.53295	3.90218	29.7612	25.3873	14.3927	16.143	3.10316	4.49528	0	4.11698	7.04574	5.77689
FBgn0023441	fus	protein_coding	2R	2.12879	0	1.44558	2.57187	5.9588	10.3696	4.70424	6.77411	1.85459	1.22755	0.716073	0.944975	12.9481	12.1752	9.5009	51.0198	8.00926	4.04444	4.58384	2.77906	0.888152	2.55168	2.12926	1.67718	2.78771	1.94272	0	0	1.06399	0	1.16624	0	11.9594	14.8361	4.53295	6.50363	0	1.0578	1.59918	5.381	3.87895	0	2.41439	0	2.11372	1.73307
FBgn0033665	Zip48C	protein_coding	2R	0	0	0	0	0.74485	0.39883	0.784039	0	0	0	0	0	0	0	1.58348	0	0.667438	0	0	1.38953	0	2.55168	0	0	0	0.971359	3.52944	2.04239	1.06399	0	0	0.944461	0	0	1.13324	0	0	0	0	0	0	0	1.20719	0	0	2.88845
FBgn0031697	CG14024	protein_coding	2L	1.0644	0	0	0.857289	0	0	0.784039	1.35482	0	0	0.716073	0	0	0	0	0	0	0	2.29192	0	0	1.27584	0	1.67718	1.39386	0.971359	1.76472	2.04239	0	0	0	0	0	0	0	0	1.6534	0	3.19837	0	0	0.56191	0	0	0	2.31076
FBti0063875		transposable_element	3L	0	0	0	0	0	0	0	0	0	0	0	0	0	0	0	0	0	0	0	0	0	0	0	0	0	0	0	0	0	0	0	0	0	0	0	0	0	0	0	0	0	0	0	0	0	0
FBgn0036545	GXIVsPLA2	protein_coding	3L	3.19319	0	1.44558	5.14373	2.23455	3.9883	3.9202	5.41929	6.80015	7.36531	8.59287	4.72487	9.71109	6.08759	6.33393	9.81149	2.00231	0	2.29192	1.38953	5.32891	7.65504	6.38777	0	15.3324	5.82815	3.52944	8.16958	7.44793	1.67578	2.33247	5.66677	2.27798	3.37185	4.53295	3.90218	3.3068	2.11561	0	0	3.10316	6.18101	7.24316	0	6.34117	5.1992
FBgn0031390	tho2	protein_coding	2L	3.19319	4.61691	2.89116	8.57289	17.1315	11.9649	13.3287	16.9353	12.3639	15.3444	19.334	13.2296	9.71109	2.43504	1.58348	11.7738	4.00463	5.66221	1.14596	5.55812	7.99337	5.10336	8.51703	11.7403	9.75699	16.5131	4.4118	4.08479	17.0238	16.7578	15.1611	17.0003	5.12546	3.37185	7.93267	6.50363	1.6534	8.46244	1.59918	0	0.775791	12.362	13.2791	4.11698	10.5686	10.9761
FBgn0010387	Acbp2	protein_coding	3L	0	0	0	0.857289	0	0	0	0	0	0	0	0	14.0271	7.30511	11.0844	37.2837	43.3835	42.0621	45.8384	66.6974	0	0	2.12926	3.35436	0	0	0	0	1.06399	0	0	0	30.1833	19.5567	12.4656	28.616	4.96019	12.6937	4.79755	56.5005	0	0	0	0	0	0
FBgn0005561	sv	protein_coding	4	0	0	0	0	0	0	0	0	0	0	0	0	0	0	0	0	0	0	0	0	0	0	2.12926	1.67718	0	0	1.76472	0	0	1.67578	0	0.944461	0.569496	1.34874	1.13324	1.30073	0	0	0	0	0	0	0	0	0	0
FBgn0051510	CG31510	protein_coding	3R	1.0644	3.07794	7.2279	2.57187	2.9794	2.39298	3.9202	4.74187	1.85459	4.29643	7.8768	0.944975	4.31604	2.43504	1.58348	0	2.00231	4.04444	6.87577	4.16859	0.888152	2.55168	4.25852	3.35436	0	1.94272	0.88236	1.0212	0	0	2.33247	2.83338	1.13899	1.34874	0	0	4.96019	1.0578	0	0	0	2.24764	2.41439	4.11698	0	0.577689
FBgn0033108	CG15236	protein_coding	2R	0	0	0	0.857289	0	0	0	0	0	0	0	0	0	0	0	0	0	0	0	0	0	0	0	1.67718	0	0	0	2.04239	0	0	0	0	0	0	0	0	0	0	0	0	0	1.12382	0	1.37233	0	0.577689
FBgn0001942	eIF4A	protein_coding	2L	1566.79	1765.2	1211.4	1205.35	803.693	847.912	776.983	720.765	1123.88	1200.55	996.057	1082	1567.8	1715.48	1518.56	1348.1	874.344	860.656	924.791	950.438	1135.95	1072.98	1190.26	1199.18	855.827	724.634	708.535	725.05	984.191	941.79	949.317	998.296	998.326	1085.06	898.658	1074.4	1213.59	936.157	1097.04	1046.61	1527.53	1564.36	1414.83	1630.33	1092.79	991.893
FBti0061436		transposable_element	2R	0	0	0	0	0	0	0	0	0	0	0	0	0	0	0	0	0	0	0	0	0	0	0	0	0	0	0	0	0	0	0	0	0	0	0	0	0	0	0	0	0	0	0	0	0	0
FBgn0035207	Herc4	protein_coding	3L	60.6706	30.7794	50.5953	34.2916	57.3534	62.2174	59.587	67.0637	53.1648	50.9434	58.718	66.1482	45.3184	46.2657	41.1706	43.1706	10.679	6.4711	5.72981	8.33717	53.2891	33.1719	51.1022	36.8979	72.4805	74.7946	62.6476	58.2083	68.0954	77.086	60.6443	68.9457	42.1427	38.4391	36.2636	40.3225	1.6534	5.28902	0	5.381	58.9601	41.0195	50.7021	39.7975	50.7293	63.5458
FBgn0011985	tRNA:Ser-AGA-2-3	tRNA	2L	0	0	0	0	0	0	0	0	0	0.613776	0	0	0	0	0	0	0	0	0	0	0	0	0	0	0	0	0	0	0	0	0	0	0	0	0	0	0	0	0	0	0	0	0	0	0	0
FBti0019447		transposable_element	3R	0	0	0	0	0	0	0	0	0	0.613776	0	0	0	0	0	0	0	0.808887	0	0	0	0	0	1.67718	0	0	0	0	0	0	0	0.944461	0.569496	0	0	0	0	0	0	0	0	0	0	0	0.704574	0
FBti0062005		transposable_element	3L	0	0	0	0	0	0	0	0	0	0	0	0	0	0	0	0	0	0	0	0	0	0	0	0	0	0	0	0	0	0	0	0	0	0	0	0	0	0	0	0	0	0	0	0	0	0
FBgn0003210	rb	protein_coding	X	10.644	7.69484	5.78232	2.57187	17.8764	15.5544	18.0329	11.516	11.7457	12.2755	15.7536	8.50477	12.9481	7.30511	12.6679	1.9623	9.34413	7.27999	8.02173	8.33717	2.66446	6.3792	2.12926	1.67718	8.36313	5.82815	13.2354	6.12718	7.44793	3.35157	9.32989	5.66677	3.98647	6.74369	9.06591	5.2029	8.26699	10.578	9.5951	5.381	0.775791	6.18101	4.82878	2.74466	9.86404	7.50996
FBgn0037124	CG14568	protein_coding	3L	1.0644	0	0	0	0	0	0	0	0	0	0	0	0	0	3.16697	1.9623	5.3395	9.70665	11.4596	5.55812	0	0	0	0	0	0	0	0	0	0	0	0	1.13899	0.674369	0	1.30073	1.6534	2.11561	3.19837	0	0	0	0	0	0	0
FBgn0266680	lncRNA:CR45170	ncRNA	3L	0	7.69484	1.44558	6.00102	5.21395	0.797659	0.784039	0.677411	4.94556	1.84133	2.86429	3.7799	1.07901	0	3.16697	0	0.667438	3.23555	3.43788	2.77906	2.66446	2.55168	2.12926	3.35436	16.7263	6.79951	7.94124	12.2544	2.12798	3.35157	1.16624	1.88892	0	0.674369	0	0	21.4942	27.5029	12.7935	13.4525	2.32737	0	3.62158	1.37233	0.704574	1.15538
FBgn0037996	CG4830	protein_coding	3R	0	0	0	0	0	0	0	0	0	0	0	0	0	0	0	0	0	0	0	0	0	0	0	0	0	0	0	0	0	0	0	0	0	0	0	0	0	0	0	0	0	0	0	0	0	0
FBgn0262866	S6kII	protein_coding	X	1.0644	3.07794	0	5.14373	3.72425	4.38712	3.9202	6.77411	1.23639	6.75153	5.72858	3.7799	3.23703	1.21752	4.75045	3.9246	6.00694	4.85332	4.58384	4.16859	3.55261	0	2.12926	5.03154	4.18157	3.88544	1.76472	1.0212	1.06399	5.02735	0	4.72231	3.41697	2.69748	3.39972	0	4.96019	9.52024	3.19837	5.381	3.87895	4.49528	3.62158	0	2.8183	0.577689
FBgn0033067	CG11211	protein_coding	2R	0	0	0	0	0	0	0	0	0	0	0	0	0	0	0	0	0	0	0	0	0	0	0	0	0	0	0	0	0	0	0	0.944461	0	0	0	0	0	0	0	0	0	0	0	0	0	0
FBgn0038535	alt	protein_coding	3R	48.9623	233.923	36.1395	57.4384	57.3534	61.8186	58.0189	57.5799	20.4004	13.5031	19.334	18.8995	26.9753	29.2204	22.1688	31.3968	8.67669	7.27999	4.58384	4.16859	117.236	40.8269	34.0681	20.1262	40.4218	35.9403	39.7062	25.5299	20.2158	20.1094	16.3273	20.7782	15.9459	16.1849	14.7321	11.7065	9.92039	8.46244	1.59918	2.6905	157.486	26.4098	26.5583	142.722	26.0692	35.8167
FBgn0035805	CG7506	protein_coding	3L	7.45078	0	8.67348	1.71458	1.4897	1.59532	1.56808	2.03223	12.3639	6.75153	8.59287	11.3397	19.4222	15.8277	23.7523	17.6607	4.00463	4.04444	1.14596	1.38953	0.888152	5.10336	0	1.67718	2.78771	0	0.88236	3.06359	3.19197	10.0547	6.99742	7.55569	7.40344	6.74369	6.79943	6.50363	0	1.0578	0	5.381	1.55158	2.24764	1.20719	0	0	1.15538
FBgn0260444	Not10	protein_coding	3R	5.32199	1.53897	7.2279	1.71458	2.23455	2.39298	3.9202	4.74187	4.32737	3.68265	4.29644	3.7799	1.07901	1.21752	3.16697	3.9246	2.66975	1.61777	4.58384	2.77906	4.44076	1.27584	8.51703	5.03154	2.78771	1.94272	7.94124	7.14838	5.31995	6.70313	1.16624	3.77785	2.84748	3.37185	2.26648	1.30073	0	4.23122	0	2.6905	6.98212	6.74292	12.0719	2.74466	8.45489	5.1992
FBgn0038437	Sdhaf3	protein_coding	3R	1.0644	0	0	0	0	0	0	0	1.23639	1.84133	2.86429	1.88995	1.07901	1.21752	1.58348	0	0	0	0	0	0	0	0	0	0	0	0	1.0212	0	0	0	1.88892	2.27798	1.34874	1.13324	2.60145	0	0	0	0	0	0	0	1.37233	0	0
FBgn0033457	Ntmt	protein_coding	2R	2.12879	3.07794	1.44558	2.57187	3.72425	4.38712	5.48828	2.03223	3.09098	2.4551	2.86429	3.7799	0	4.87007	3.16697	0	4.67207	0	2.29192	0	0.888152	5.10336	2.12926	1.67718	1.39386	0.971359	3.52944	5.10599	7.44793	6.70313	4.66495	5.66677	3.41697	0.674369	2.26648	2.60145	0	1.0578	0	0	1.55158	3.37146	3.62158	2.74466	3.52287	7.50996
FBti0062530		transposable_element	2R	0	0	0	0	0	0.39883	0	0	0	0	0	0	0	0	0	0	0	0	0	0	0	0	0	0	0	0	0	0	0	0	0	0	0	0	0	0	0	0	0	0	0	0	0	0	0	0
FBti0062607		transposable_element	2R	0	0	0	0	0	0.797659	0	0	0	0	0	0	0	0	0	0	0	0	0	0	0	0	0	0	0	0	0	0	0	0	0	0	0	0	0	0	0	1.0578	0	0	0	0	0	0	0	0
FBgn0033337	CG8272	protein_coding	2R	8.51518	3.07794	7.2279	4.28645	0.74485	0.39883	1.56808	2.03223	3.09098	1.84133	0.716073	3.7799	0	3.65256	1.58348	1.9623	4.00463	5.66221	1.14596	5.55812	1.7763	6.3792	2.12926	3.35436	2.78771	0.971359	3.52944	1.0212	1.06399	0	0	0.944461	1.70849	2.69748	2.26648	1.30073	1.6534	4.23122	4.79755	2.6905	0	0.56191	4.82878	1.37233	2.11372	0.577689
FBti0064275		transposable_element	2R	0	0	0	0	0	0	0	0	0	0	0	0	0	0	0	0	0	0.808887	0	0	0	0	0	0	0	0	0	0	0	0	1.16624	0	0	0	0	0	0	0	0	0	0	0.56191	0	0	0	0
FBgn0038369	Arpc3A	protein_coding	3R	7.45078	6.15588	4.33674	7.7156	8.93819	7.97659	7.84039	12.1934	12.3639	12.2755	10.7411	10.3947	12.9481	18.2628	11.0844	13.7361	8.00926	5.66221	6.87577	5.55812	5.32891	5.10336	0	6.70872	5.57542	5.82815	2.64708	3.06359	14.8959	13.4063	18.6598	14.1669	19.3628	14.1618	14.7321	23.4131	6.61359	4.23122	9.5951	13.4525	4.65475	3.37146	7.24316	6.86164	9.15946	5.1992
FBgn0038645	CG7714	protein_coding	3R	0	0	0	0	0	0	0	0	0	0	0	0	0	0	0	0	0	0	0	0	0	0	0	0	1.39386	0.971359	0	0	0	0	0	0	0	0	0	0	0	0	0	0	0	0	0	0	0	0
FBgn0086758	chinmo	protein_coding	2L	70.2502	15.3897	37.5851	54.0092	49.9049	47.4607	50.9626	67.0637	41.4191	34.3714	46.5447	27.4043	223.355	233.764	245.44	147.172	13.3488	31.5466	40.1086	16.6743	51.5128	14.0342	48.9729	26.8349	87.8129	94.2218	59.1181	102.12	32.9837	56.9766	33.8209	42.5008	194.198	138.246	192.651	118.366	44.6417	22.2139	36.7812	21.524	9.30949	98.8962	53.1165	17.8403	62.7071	45.6375
FBgn0262030	CG42841	protein_coding	3L	0	0	0	0	0	0	0	0	0	0	0	0	0	0	0	0	0	0	0	0	0	0	0	0	0	0	0	0	0	0	0	0	0	0	0	0	0	0	0	0	0	0.56191	0	0	0	0
FBti0019461		transposable_element	3R	0	0	0	0	0.74485	0.39883	0	0.677411	0	0	0	0	0	0	0	0	0	0	0	0	0	0	0	0	0	0.971359	0	2.04239	0	0	0	0	0	0	0	0	0	0	0	0	0	0.56191	0	0	0	0
FBgn0035429	CG12017	protein_coding	3L	0	0	0	0	0	0.39883	0	0	0	0	0	0	0	0	1.58348	1.9623	0	0	0	0	0	0	0	0	2.78771	0	0.88236	0	0	0	0	0	0	0	0	0	0	0	0	0	0.775791	0	0	4.11698	0	0
FBgn0000565	MsrA	protein_coding	3L	26.6099	10.7728	30.3572	30.0051	48.4152	39.4841	61.9391	45.3865	16.6913	14.7306	16.4697	33.0741	6.47406	23.1328	33.2532	11.7738	6.00694	4.04444	11.4596	4.16859	1.7763	7.65504	2.12926	5.03154	23.6955	33.0262	35.2944	14.2968	6.38394	8.37891	8.16366	13.2225	22.2103	17.5336	14.7321	22.1123	234.782	71.9307	204.696	104.93	5.43054	6.18101	3.62158	13.7233	36.6378	36.3944
FBgn0037570	CG11693	protein_coding	3R	0	0	0	0	0	0	0	0	1.23639	0.613776	0.716073	0.944975	0	0	0	0	0	0	0	0	0	0	0	0	0	0	0	0	2.12798	0	3.49871	0.944461	0	0	0	0	0	0	0	0	0	0	0	0	0	0
FBgn0263047	CG43342	protein_coding	3R	0	0	0	0.857289	0.74485	0.39883	0	0	0	0	0.716073	0.944975	0	0	0	0	0	0	0	0	0	0	0	0	0	0	0.88236	0	1.06399	0	1.16624	0	0.569496	0	0	1.30073	0	0	0	0	0	0	0	0	0	0
FBgn0011785	BRWD3	protein_coding	3R	2.12879	0	1.44558	3.42916	3.72425	5.18478	3.13616	8.80634	4.94556	4.91021	4.29644	1.88995	2.15802	3.65256	1.58348	1.9623	6.67438	3.23555	2.29192	0	3.55261	3.82752	0	3.35436	1.39386	8.74223	5.29416	5.10599	2.12798	1.67578	0	2.83338	1.70849	1.34874	1.13324	3.90218	3.3068	4.23122	1.59918	2.6905	6.98212	2.24764	2.41439	1.37233	3.52287	1.15538
FBgn0015793	Rab19	protein_coding	3L	0	6.15588	1.44558	2.57187	2.23455	1.59532	0.784039	1.35482	0.618195	3.68265	0.716073	1.88995	3.23703	0	1.58348	1.9623	10.0116	16.1777	8.02173	16.6743	3.55261	7.65504	0	6.70872	1.39386	0.971359	5.29416	4.08479	2.12798	3.35157	2.33247	0	1.13899	1.34874	1.13324	1.30073	4.96019	2.11561	11.1943	13.4525	1.55158	2.80955	2.41439	2.74466	3.52287	1.73307
FBgn0035063	CG3594	protein_coding	2R	0	0	0	0	0	0	0.784039	0	0.618195	1.22755	0.716073	1.88995	0	0	0	0	0.667438	0	0	1.38953	0.888152	0	0	0	0	0	0	0	2.12798	1.67578	1.16624	3.77785	0	1.34874	0	0	0	0	0	0	0	0.56191	0	0	0.704574	0.577689
FBgn0037705	mura	protein_coding	3R	34.0607	70.7926	30.3572	41.1499	56.6086	49.056	54.0987	53.5154	22.8732	20.8684	18.6179	21.7344	25.8962	35.308	34.8366	27.4722	57.3997	63.9021	48.1304	45.8544	42.6313	43.3786	23.4218	30.1892	36.2402	26.2267	45.0004	30.6359	12.7679	8.37891	15.1611	11.3335	28.4748	28.9979	22.6648	15.6087	69.4427	66.6417	65.5665	80.7151	43.4443	37.648	27.7655	49.4038	30.2967	25.996
FBgn0034214	CG6550	protein_coding	2R	0	1.53897	0	2.57187	3.72425	5.18478	3.13616	4.74187	8.03654	2.4551	7.16073	6.61482	1.07901	4.87007	0	1.9623	0	1.61777	0	0	1.7763	3.82752	0	5.03154	6.96928	6.79951	4.4118	8.16958	5.31995	13.4063	12.8286	13.2225	1.13899	2.02311	1.13324	7.80435	0	0	0	5.381	0.775791	2.80955	1.20719	2.74466	9.15946	8.08765
FBgn0038454	CG10324	protein_coding	3R	1.0644	0	0	0.857289	0	0.797659	0.784039	2.70964	0	1.22755	2.86429	2.83492	0	1.21752	1.58348	0	3.33719	1.61777	2.29192	4.16859	0	0	0	0	4.18157	0.971359	1.76472	2.04239	0	0	0	0.944461	2.27798	1.34874	0	1.30073	3.3068	0	3.19837	0	2.32737	0.56191	1.20719	1.37233	3.52287	0.577689
FBgn0032717	CG10600	protein_coding	2L	6.38638	4.61691	8.67348	12.002	18.6212	9.17308	3.13616	15.5804	4.32737	5.52398	6.44466	12.2847	3.23703	1.21752	7.91742	1.9623	28.6998	12.1333	6.87577	13.8953	5.32891	5.10336	2.12926	5.03154	13.9386	15.5417	10.5883	22.4663	4.25596	6.70313	6.99742	0	3.41697	4.72059	3.39972	0	24.801	26.4451	9.5951	5.381	6.20633	11.8001	0	5.48931	7.75031	10.9761
FBgn0001308	Khc	protein_coding	2R	38.3183	43.0911	31.8028	45.4363	55.1189	53.842	54.8828	60.2895	42.6555	66.9016	50.8412	33.0741	50.7135	38.9606	39.5871	60.8313	32.037	51.7688	24.0652	37.5173	35.5261	33.1719	31.9389	26.8349	58.5419	62.167	63.5299	78.6322	38.3037	33.5157	47.8157	53.8343	64.9225	55.2983	47.596	62.4348	42.9883	38.081	47.9755	34.9765	31.8074	31.467	35.0086	45.2868	51.4339	53.1474
FBgn0004619	GluRIA	protein_coding	3L	0	0	0	0	0	0	0	0	0	0	0	0	0	0	0	0	0	0	0	0	0	0	0	0	0	0	0	1.0212	0	0	0	0	0	0	0	0	0	0	0	0	0	0	0	0	0	0
FBgn0002174	CG5504	protein_coding	2R	6.38638	7.69484	1.44558	3.42916	5.21395	9.97074	12.5446	10.8386	50.692	45.4194	54.4215	40.6339	41.0024	68.181	52.255	43.1706	12.0139	11.3244	6.87577	13.8953	11.546	2.55168	8.51703	13.4174	13.9386	17.4845	7.94124	22.4663	32.9837	43.5703	44.317	38.7229	29.6138	42.4853	36.2636	48.1268	9.92039	1.0578	1.59918	29.5955	6.20633	6.74292	12.0719	6.86164	13.3869	9.24303
FBgn0031313	CG5080	protein_coding	2L	2.12879	3.07794	0	3.42916	653.233	623.371	641.344	701.797	8.65473	12.2755	12.1732	23.6244	24.8172	12.1752	42.7541	27.4722	923.734	587.252	567.251	735.061	8.88152	0	2.12926	6.70872	960.366	1215.17	1074.71	1210.12	71.2874	62.004	64.143	32.1117	76.3124	99.8067	109.924	130.073	791.978	671.706	534.127	546.172	9.30949	6.74292	4.82878	17.8403	1609.25	1540.7
FBgn0038238	CG14854	protein_coding	3R	0	0	0	0.857289	0	0	0	0	0	0	0	0	0	0	0	0	0	0	0	0	0	0	0	0	0	0	0	0	0	0	0	0	0	0	0	0	0	0	0	0	0	0	0	0	0	0
FBgn0266636	asRNA:CR45143	ncRNA	2R	0	0	0	0	0.74485	1.59532	0	0	0	0	0	0	0	0	0	0	0	0	0	0	0	0	0	0	0	0	0	0	0	0	0	0	0	0	0	0	0	0	0	0	0	0	0	0	0	0
FBgn0032520	CG10859	protein_coding	2L	0	0	0	0	0	0	0	0	0	0	0	0.944975	0	0	0	0	0	0	0	0	1.7763	0	0	0	0	0	0	0	0	0	0	0	0	0	0	0	0	0	0	0	0	0	0	0	0	0
FBgn0035331	MsR1	protein_coding	3L	0	0	0	0	0	0	0	0	0	0	0	0	0	0	0	0	0	0	0	0	0	0	0	0	0	0	0	0	0	0	0	0	0	0	0	0	0	0	0	0	0	0	0	0	0	0
FBgn0035674	CG13295	protein_coding	3L	2.12879	0	1.44558	0	2.23455	1.99415	0.784039	0.677411	0	0	0	0.944975	2.15802	1.21752	0	0	23.3603	19.4133	21.7733	20.8429	4.44076	0	2.12926	6.70872	2.78771	1.94272	5.29416	5.10599	3.19197	1.67578	0	1.88892	2.84748	4.04622	2.26648	3.90218	24.801	22.2139	25.5869	10.762	2.32737	6.74292	3.62158	0	3.52287	1.15538
FBgn0051998	CG31998	protein_coding	4	4.25759	1.53897	0	2.57187	4.4691	8.37542	7.84039	7.45152	7.41834	8.59286	5.72858	8.50477	0	4.87007	3.16697	0	21.358	8.89776	8.02173	9.7267	8.88152	6.3792	2.12926	1.67718	8.36313	5.82815	4.4118	2.04239	3.19197	6.70313	10.4961	11.3335	5.12546	9.44117	4.53295	3.90218	14.8806	9.52024	7.99592	13.4525	5.43054	1.68573	3.62158	6.86164	4.22744	3.46614
FBti0019749		transposable_element	2L	0	0	0	0	0	0	0	0	0	0	0	0.944975	0	0	0	0	0	0	0	0	0	0	0	0	0	0	0	0	1.06399	0	0	0	0	0.674369	0	0	0	0	0	0	0	0	0	0	0	0
FBgn0266369	Mtp	protein_coding	2L	5.32199	1.53897	1.44558	2.57187	3.72425	6.38127	7.84039	4.74187	1.85459	0.613776	3.58036	0	8.63208	7.30511	3.16697	11.7738	4.00463	4.04444	11.4596	8.33717	0.888152	3.82752	4.25852	3.35436	1.39386	9.71359	17.6472	9.19078	2.12798	0	2.33247	1.88892	11.3899	9.44117	22.6648	13.0073	0	1.0578	1.59918	8.07151	0.775791	3.37146	1.20719	4.11698	19.0235	6.93227
FBgn0083068	CG33947	protein_coding	3L	0	0	1.44558	0.857289	1.4897	0	0.784039	0.677411	0	1.22755	0	0.944975	0	0	0	0	1.33488	0	2.29192	1.38953	0	0	0	0	0	0	0	1.0212	1.06399	0	0	0	0	0	0	0	3.3068	2.11561	4.79755	2.6905	0	0	0	0	0	0
FBgn0038838	TotB	protein_coding	3R	0	0	0	0	0.74485	0.39883	0	0.677411	0	0	0	0	0	0	0	0	0	0	0	0	0	0	0	0	2.78771	0	0	0	0	1.67578	1.16624	0.944461	0	0	0	0	0	0	0	0	0	0	0	0	0	0
FBgn0260743	GC1	protein_coding	3R	2.12879	0	1.44558	0	0	0.39883	0	0	0	0	0	0	0	1.21752	0	0	0.667438	0	2.29192	0	0	0	0	0	0	0	0	0	0	0	0	0	0	0.674369	0	0	1.6534	0	0	0	0	0	0	0	0.704574	0
FBgn0028331	l(1)G0289	protein_coding	X	113.891	221.612	193.708	205.749	102.789	112.869	106.629	100.257	41.4191	46.647	28.6429	36.854	36.6864	32.873	34.8366	27.4722	137.492	91.4043	85.9471	101.436	211.38	142.894	268.286	182.813	87.8129	119.477	118.236	97.0138	45.7516	50.2735	41.9845	34.9451	25.6273	43.834	48.7292	39.0218	147.152	178.769	86.3559	104.93	333.59	342.765	176.25	377.39	105.686	138.068
FBgn0034258	eIF3c	protein_coding	2R	80.8942	69.2536	69.3878	67.7258	96.0856	112.869	123.878	121.257	174.331	174.926	163.265	145.526	58.2666	73.0511	39.5871	60.8313	58.7345	59.0488	45.8384	54.1916	111.019	91.8605	85.1703	139.206	135.204	131.133	157.942	124.586	300.045	398.836	327.713	282.394	74.6039	76.8781	58.9284	59.8334	74.4029	44.4278	38.3804	43.048	198.602	152.278	173.836	145.467	195.167	212.012
FBgn0030892	CG7206	protein_coding	X	1.0644	4.61691	2.89116	6.00102	3.72425	4.78595	3.13616	7.45152	3.70917	4.91021	5.01251	0.944975	0	1.21752	0	5.8869	7.34182	2.42666	5.72981	2.77906	7.10522	3.82752	2.12926	3.35436	6.96928	4.85679	9.70596	6.12718	5.31995	1.67578	8.16366	3.77785	0.569496	3.37185	5.66619	5.2029	11.5738	0	4.79755	13.4525	4.65475	5.6191	4.82878	12.351	3.52287	7.50996
FBgn0000617	e(y)1	protein_coding	X	3.19319	1.53897	1.44558	3.42916	1.4897	5.18478	4.70424	6.0967	1.85459	0.613776	8.59287	2.83492	2.15802	2.43504	1.58348	0	2.66975	1.61777	1.14596	1.38953	2.66446	1.27584	4.25852	0	5.57542	2.91408	5.29416	10.212	2.12798	5.02735	4.66495	6.61123	2.84748	2.69748	1.13324	0	0	6.34683	1.59918	0	3.87895	1.68573	2.41439	1.37233	9.86404	10.9761
FBgn0034789	PIP5K59B	protein_coding	2R	1.0644	4.61691	1.44558	1.71458	5.21395	0.797659	3.9202	2.70964	3.09098	2.4551	2.86429	2.83492	5.39505	1.21752	3.16697	7.84919	15.3511	11.3244	14.8975	6.94764	2.66446	5.10336	2.12926	1.67718	1.39386	3.88544	4.4118	4.08479	4.25596	1.67578	9.32989	1.88892	5.12546	10.1155	9.06591	2.60145	3.3068	5.28902	7.99592	8.07151	9.30949	7.86674	7.24316	8.23397	3.52287	1.73307
FBgn0004620	GluRIIA	protein_coding	2L	15.966	16.9287	20.2381	28.2905	17.1315	11.5661	9.40847	14.903	14.2185	18.4133	17.9018	16.0646	20.5012	29.2204	6.33393	13.7361	16.0185	9.70665	12.6056	13.8953	21.3157	12.7584	12.7755	16.7718	12.5447	7.77087	13.2354	15.318	36.1757	13.4063	26.8234	25.5005	27.3358	29.6723	36.2636	35.1196	33.068	32.7919	30.3845	24.2145	12.4127	17.4192	14.4863	28.8189	18.3189	25.4183
FBgn0003444	smo	protein_coding	2L	1.0644	0	1.44558	0.857289	0.74485	0.797659	2.35212	4.06446	1.23639	2.4551	0.716073	0.944975	2.15802	0	1.58348	0	0.667438	2.42666	0	1.38953	0.888152	0	2.12926	3.35436	1.39386	5.82815	1.76472	1.0212	0	1.67578	0	1.88892	1.70849	0	0	1.30073	0	3.17341	0	0	0	0.56191	0	1.37233	1.40915	2.88845
FBgn0052831	CG33695	protein_coding	2L	0	0	0	0.857289	1.4897	3.9883	4.70424	4.06446	3.70917	3.06888	2.14822	0.944975	1.07901	0	3.16697	3.9246	1.33488	2.42666	0	2.77906	1.7763	0	4.25852	0	1.39386	1.94272	5.29416	3.06359	2.12798	3.35157	3.49871	2.83338	1.70849	0	0	0	6.61359	1.0578	3.19837	0	4.65475	1.68573	2.41439	0	2.11372	1.73307
FBgn0035228	CG12091	protein_coding	3L	22.3523	15.3897	11.5646	12.002	17.8764	12.3637	14.8967	14.2256	33.3825	36.2128	28.6429	21.7344	34.5283	28.0029	26.9192	39.246	23.3603	21.84	8.02173	16.6743	15.0986	15.3101	17.0341	21.8033	22.3017	19.4272	23.8237	23.4875	30.8557	35.1914	44.317	45.3341	46.1291	55.2983	33.9972	40.3225	4.96019	8.46244	17.591	16.143	15.5158	21.3526	15.6935	20.5849	14.0915	20.2191
FBgn0051908	CG31908	protein_coding	2L	11.7084	12.3118	10.1191	12.8593	26.8146	37.49	36.8499	37.935	48.2192	47.8745	47.2608	45.3588	25.8962	24.3504	38.0036	15.6984	5.3395	10.5155	12.6056	13.8953	13.3223	15.3101	14.9048	15.0946	20.9078	23.3126	22.059	35.7419	57.4555	55.3008	34.9871	51.0009	22.2103	22.9286	12.4656	28.616	8.26699	9.52024	14.3927	2.6905	33.359	21.9145	20.5223	21.9572	29.5921	23.1076
FBti0020107		transposable_element	3L	0	0	0	0	0	0	0	0	0	0	0	0	0	0	0	0	0	0	0	0	0	0	0	0	0	0	0	0	0	0	0	0	0.569496	0	0	0	0	0	0	0	0	0	0	0	0	0
FBgn0259151	CG42266	protein_coding	2L	0	0	0	0	0	0	0	0	0	0	0	0	0	0	0	0	0	0	0	0	0	0	0	0	0	0	0	0	0	0	0	0	0	0	0	0	0	0	0	0	0	0	0	0	0.704574	0
FBgn0034197	Cda9	protein_coding	2R	0	0	0	0	0	0	0	0	0	0	0	0	0	0	0	0	0	0	0	0	0	0	0	0	0	0	0	0	0	0	0	0	0.569496	0	0	0	0	0	0	0	0	0	0	0	0	0
FBgn0036816	Indy	protein_coding	3L	9.57958	9.23381	0	0.857289	18.6212	14.7567	20.385	18.9675	6.18195	3.68265	8.59287	5.66985	2.15802	6.08759	4.75045	5.8869	22.6929	19.4133	13.7515	25.0115	7.99337	6.3792	0	1.67718	16.7263	33.0262	13.2354	32.6783	6.38394	3.35157	9.32989	3.77785	12.5289	8.7668	5.66619	15.6087	11.5738	14.8093	4.79755	13.4525	15.5158	1.12382	4.82878	26.0742	23.2509	28.3068
FBgn0030466	CG15744	protein_coding	X	3.19319	6.15588	0	4.28645	29.794	22.7333	18.8169	18.9675	13.6003	10.4342	10.025	8.50477	1.07901	6.08759	6.33393	3.9246	8.67669	4.04444	2.29192	1.38953	5.32891	1.27584	4.25852	5.03154	26.4833	20.3985	11.4707	9.19078	8.51192	5.02735	5.83118	9.44461	3.41697	4.04622	0	2.60145	1.6534	1.0578	4.79755	0	6.98212	5.6191	0	5.48931	13.3869	10.3984
FBgn0030974	Flacc	protein_coding	X	6.38638	3.07794	4.33674	7.7156	11.9176	13.959	10.9766	13.5482	5.56376	7.97908	6.44466	15.1196	3.23703	4.87007	1.58348	5.8869	4.67207	4.04444	5.72981	2.77906	1.7763	7.65504	8.51703	6.70872	5.57542	16.5131	11.4707	11.2332	8.51192	8.37891	4.66495	4.72231	6.26445	4.04622	1.13324	10.4058	6.61359	6.34683	3.19837	5.381	1.55158	3.93337	7.24316	5.48931	3.52287	7.50996
FBgn0083987	snRNA:U11	snRNA	3L	0	0	0	0	0.74485	0	0	0	0	0	0	0	0	0	0	0	0	0	0	0	0	0	0	0	0	0	0	0	0	0	0	0	0	0	0	0	0	0	0	0	0	0	0	0	0	0
FBgn0067629	CG33332	protein_coding	3R	0	0	0	0	0	0.39883	0	0	0.618195	1.22755	1.43215	0.944975	1.07901	0	0	0	0	0.808887	0	0	0	0	0	0	1.39386	0	0	2.04239	2.12798	0	0	0	0	1.34874	2.26648	1.30073	0	0	0	0	0.775791	0	0	0	0	0
FBgn0267913	lncRNA:CR46194	ncRNA	2R	0	0	1.44558	0	0	0	0.784039	0	0.618195	0	0.716073	0	0	0	0	0	0.667438	0.808887	0	1.38953	0.888152	1.27584	0	1.67718	0	0.971359	0.88236	0	0	0	2.33247	0.944461	0	0.674369	0	1.30073	1.6534	3.17341	1.59918	0	0	1.12382	0	0	0.704574	0
FBgn0032882	Ns4	protein_coding	2L	0	3.07794	0	1.71458	1.4897	1.59532	0	2.03223	1.23639	1.22755	3.58036	2.83492	1.07901	0	0	0	0	0	0	0	0.888152	3.82752	0	0	2.78771	0.971359	0	1.0212	3.19197	5.02735	5.83118	4.72231	1.13899	0	0	0	0	0	0	0	0	2.80955	2.41439	0	0	2.88845
FBgn0017590	klg	protein_coding	3R	0	0	0	0	0	0	0	0	0	0	0	0	0	0	0	0	0.667438	0.808887	0	0	0	0	0	0	0	0	0	0	0	0	0	0	0	0	0	0	0	0	0	0	0	0	0	0	0	0
FBgn0033817	GstE14	protein_coding	2R	0	0	0	0	0	0	0	0	0	0	0	0	0	0	0	0	6.00694	2.42666	1.14596	2.77906	0	0	0	0	0	0	0	0	0	0	0	0	0	0	0	0	6.61359	7.40463	11.1943	2.6905	0	0	0	0	0	0
FBgn0030429	CG4661	protein_coding	X	0	0	0	0	0	0	0.784039	0.677411	0	0	0	0	0	0	0	0	0	0	0	0	0	0	0	0	1.39386	1.94272	0.88236	0	0	0	1.16624	0	0	0	0	0	0	0	0	0	0	0	0	0	0	0.577689
FBgn0022097	Vha36-1	protein_coding	2R	42.5759	61.5588	36.1395	54.0092	23.0903	19.5426	28.2254	23.7094	17.9277	9.20664	12.8893	11.3397	18.3432	13.3927	20.5853	23.5476	26.0301	33.9733	50.4223	25.0115	34.6379	22.9651	46.8437	20.1262	30.6648	23.3126	20.2943	30.6359	19.1518	10.0547	15.1611	17.0003	16.5154	12.1386	22.6648	5.2029	21.4942	37.0232	38.3804	53.81	31.8074	33.7146	35.0086	59.0101	26.0692	24.263
FBgn0036410	CG8100	protein_coding	3L	0	0	0	0	0	0	0	0	0	0	0	0	0	0	0	0	0	0	0	0	0	0	0	0	0	0	0	0	0	0	0	0	0	0	0	0	0	0	0	0	0	0	0	0	0.704574	0
FBgn0035763	mrva	protein_coding	3L	26.6099	64.6367	44.813	44.579	54.374	50.2525	61.1551	70.4507	8.03654	5.52398	10.025	9.44975	4.31604	3.65256	15.8348	7.84919	43.3835	31.5466	19.4813	36.1277	46.1839	17.8618	25.5511	18.449	44.6034	54.3961	45.0004	52.0811	17.0238	13.4063	15.1611	5.66677	8.54243	8.7668	14.7321	16.9094	47.9485	44.4278	20.7894	16.143	79.9065	32.0289	28.9727	59.0101	72.5711	56.6136
FBgn0033212	LRR	protein_coding	2R	2.12879	7.69484	2.89116	4.28645	20.8558	19.5426	22.7371	16.2579	4.32737	4.91021	2.86429	3.7799	6.47406	2.43504	7.91742	5.8869	4.00463	6.4711	9.16769	4.16859	2.66446	1.27584	0	0	6.96928	8.74223	4.4118	13.2756	3.19197	0	3.49871	1.88892	1.70849	2.69748	3.39972	2.60145	13.2272	2.11561	4.79755	10.762	1.55158	1.12382	0	1.37233	7.04574	6.35458
FBgn0267483	lncRNA:CR45833	ncRNA	3L	0	0	0	0	0	0	0	0	0	0	0	0	0	0	0	0	0	0	0	0	0	0	0	0	0	0	0	0	0	0	0	0	0	0	0	0	1.6534	0	0	0	0	0	0	0	0	0
FBgn0039726	eIF2Balpha	protein_coding	3R	6.38638	6.15588	2.89116	4.28645	7.4485	7.57776	1.56808	9.48375	9.27293	6.75153	11.4572	11.3397	8.63208	7.30511	6.33393	3.9246	4.00463	0.808887	4.58384	1.38953	7.10522	2.55168	2.12926	3.35436	12.5447	5.82815	7.94124	13.2756	11.7039	13.4063	6.99742	10.3891	8.54243	6.74369	5.66619	0	0	0	0	2.6905	7.75791	12.9239	10.8647	5.48931	9.86404	9.24303
FBgn0015036	Cyp4ae1	protein_coding	X	0	0	0	0	0	0	0	0	0	0	0	0	0	0	0	1.9623	0	0	1.14596	2.77906	0	1.27584	0	0	0	0	0	0	0	0	0	0	0.569496	0.674369	0	2.60145	0	1.0578	0	0	0	1.68573	0	0	0	0
FBgn0260634	eIF4G2	protein_coding	3R	3.19319	10.7728	5.78232	8.57289	23.8352	29.9122	19.601	28.4512	25.346	32.5301	20.7661	20.7894	10.7901	13.3927	6.33393	9.81149	12.0139	10.5155	12.6056	11.1162	5.32891	5.10336	8.51703	1.67718	33.4525	16.5131	22.9414	29.6147	28.7277	26.8125	18.6598	17.9448	10.2509	9.44117	12.4656	3.90218	44.6417	49.7168	47.9755	29.5955	13.9642	7.30483	8.45036	4.11698	17.6144	19.0637
FBgn0034032	CG8195	protein_coding	2R	1.0644	6.15588	8.67348	4.28645	2.23455	0.797659	3.13616	3.38705	2.47278	2.4551	2.86429	2.83492	1.07901	1.21752	1.58348	0	6.67438	2.42666	9.16769	0	3.55261	2.55168	2.12926	3.35436	4.18157	0.971359	1.76472	3.06359	1.06399	3.35157	1.16624	1.88892	0	2.02311	0	1.30073	3.3068	5.28902	1.59918	0	3.10316	1.68573	2.41439	1.37233	0	1.15538
FBgn0266140	lncRNA:CR44846	ncRNA	2L	0	0	0	0	0	0	0	0	0	0	0	0	0	0	0	0	0	0	0	0	0	0	0	0	0	0	0	0	0	0	0	0	0	0	0	0	0	0	0	0	0	0	0	0	0	0
FBgn0016041	Tom40	protein_coding	X	4.25759	1.53897	2.89116	6.00102	17.8764	23.1321	21.1691	16.9353	232.441	313.639	210.525	236.244	171.563	149.755	129.846	139.323	14.0162	12.9422	25.2111	20.8429	7.10522	6.3792	6.38777	8.3859	12.5447	15.5417	16.7648	10.212	124.487	160.875	127.12	144.503	88.2718	60.6932	65.7278	54.6305	0	2.11561	1.59918	21.524	2.32737	2.80955	6.03597	5.48931	8.45489	23.1076
FBgn0034580	Cht8	protein_coding	2R	0	0	0	0	0	0	0	0	0	0	0	0	0	0	0	0	0	0	0	0	0	0	0	0	0	0	0	0	0	0	0	0	0	0	0	0	0	0	0	0	0	0	0	0	0	0
FBgn0085452	CG34423	protein_coding	2R	8.51518	1.53897	1.44558	0.857289	0.74485	0.39883	0	0	8.03654	6.13776	7.16073	6.61482	8.63208	3.65256	12.6679	5.8869	0	0	0	0	1.7763	2.55168	6.38777	11.7403	0	0	0	0	7.44793	3.35157	3.49871	8.50015	10.2509	19.5567	12.4656	14.308	1.6534	1.0578	1.59918	2.6905	1.55158	5.6191	16.9007	0	0.704574	0.577689
FBgn0031450	Hrs	protein_coding	2L	8.51518	35.3963	15.9014	15.4312	13.4073	15.5544	12.5446	10.1612	3.09098	3.68265	3.58036	2.83492	2.15802	1.21752	0	1.9623	24.0278	22.6488	24.0652	30.5696	28.4209	6.3792	31.9389	11.7403	19.514	14.5704	19.4119	24.5087	2.12798	1.67578	2.33247	5.66677	7.40344	4.04622	7.93267	2.60145	26.4544	30.6763	35.182	18.8335	38.7895	8.99057	7.24316	35.6805	12.6823	15.0199
FBgn0034727	mRpS29	protein_coding	2R	0	1.53897	0	0.857289	0.74485	1.59532	3.13616	1.35482	4.32737	3.06888	5.01251	2.83492	0	7.30511	6.33393	9.81149	2.00231	1.61777	0	0	1.7763	1.27584	0	1.67718	2.78771	2.91408	0	0	3.19197	8.37891	5.83118	6.61123	7.40344	4.72059	4.53295	7.80435	0	0	1.59918	2.6905	0	1.68573	0	2.74466	0.704574	0.577689
FBgn0037231	Vps24	protein_coding	3R	0	0	0	0	0	0	0	0.677411	0	0	0	0	0	0	0	0	0	1.61777	0	0	0	0	0	0	0	0	0	0	0	0	0	0	0	0	1.13324	0	0	1.0578	0	0	0	0.56191	0	1.37233	0	0
FBgn0030100	CG12106	protein_coding	X	2.12879	0	0	1.71458	1.4897	0.39883	0	0	2.47278	0	0	0.944975	1.07901	0	0	0	0.667438	0	0	1.38953	0	0	0	0	0	0	0.88236	0	1.06399	1.67578	0	3.77785	0	0	0	0	0	1.0578	0	0	0	0	2.41439	0	0	0
FBgn0284250	Oaz	protein_coding	2R	0	0	0	0.857289	0.74485	0.39883	0	0	0	0	0	0	0	0	0	0	0.667438	3.23555	2.29192	0	0.888152	0	0	0	0	0	0	0	1.06399	0	0	0	0	0	0	0	0	0	1.59918	2.6905	0	0	0	1.37233	0	0
FBgn0260985	RfC4	protein_coding	3L	1.0644	0	0	1.71458	2.9794	2.79181	3.13616	2.03223	4.94556	5.52398	7.16073	7.5598	0	1.21752	0	5.8869	2.00231	1.61777	1.14596	1.38953	0.888152	0	0	0	0	1.94272	3.52944	3.06359	8.51192	5.02735	5.83118	2.83338	1.13899	0	1.13324	0	0	0	0	0	0.775791	0.56191	1.20719	1.37233	3.52287	1.73307
FBgn0052564	CG32564	protein_coding	X	0	0	0	0	0	0	0	0	0	0	0	0	0	0	0	0	0	0	0	0	0	0	0	0	0	0	0	0	0	0	0	0	0	0	0	0	0	0	0	0	0	0	2.41439	0	0	0
FBgn0010398	Lrr47	protein_coding	2L	0	0	0	0.857289	0.74485	1.99415	1.56808	4.74187	3.09098	0.613776	0.716073	1.88995	0	2.43504	1.58348	0	1.33488	1.61777	3.43788	1.38953	0	1.27584	0	0	0	0.971359	4.4118	5.10599	2.12798	0	1.16624	1.88892	0	1.34874	4.53295	2.60145	0	2.11561	0	0	0	1.68573	3.62158	0	2.8183	2.31076
FBgn0014127	barr	protein_coding	2L	1.0644	1.53897	1.44558	0.857289	35.7528	25.9239	27.4414	20.3223	22.8732	20.8684	17.9018	27.4043	34.5283	26.7854	25.3357	43.1706	16.0185	21.0311	19.4813	26.401	0	0	2.12926	1.67718	16.7263	17.4845	16.7648	15.318	31.9197	18.4336	25.6572	28.3338	13.6679	20.9054	18.1318	32.5181	8.26699	11.6358	17.591	16.143	0	1.68573	0	0	16.9098	23.6853
FBgn0030990	CG7556	protein_coding	X	15.966	4.61691	23.1293	11.1448	16.3867	16.7508	21.9531	9.48375	12.3639	16.5719	11.4572	6.61482	21.5802	14.6102	23.7523	21.5853	7.34182	8.89776	14.8975	13.8953	16.8749	19.1376	21.2926	18.449	22.3017	25.2553	22.9414	16.3392	18.0878	6.70313	12.8286	10.3891	8.54243	11.4643	18.1318	13.0073	13.2272	25.3873	12.7935	24.2145	25.6011	24.1621	32.5942	20.5849	16.9098	19.6414
FBti0062421		transposable_element	2R	0	0	0	0.857289	0.74485	0	0	0.677411	0	0	0	0	0	0	0	0	0	0	0	0	0	0	0	0	2.78771	0	0	0	2.12798	0	1.16624	0	0	0	0	0	0	0	0	0	0	0	0	0	0	0
FBti0064178		transposable_element	4	0	0	0	0	0	0	0	0	0	0	0	0	0	0	0	0	0	0	0	0	0	0	0	0	0	0	0	0	0	0	0	0	1.13899	0.674369	0	0	0	1.0578	0	0	0	0	0	0	0	0.577689
FBti0063714		transposable_element	3R	0	0	0	0	0	0	0	0.677411	0	0.613776	0	0	0	0	0	0	0	0	0	0	0	0	0	0	0	0	0	0	0	0	0	0	0	0	0	0	0	0	0	0	0	0	0	0	0	0
FBgn0026080	Tip60	protein_coding	X	4.25759	3.07794	2.89116	3.42916	0	1.19649	1.56808	2.03223	0	0	1.43215	1.88995	0	0	1.58348	1.9623	4.00463	4.04444	12.6056	6.94764	2.66446	0	6.38777	0	2.78771	0.971359	0	7.14838	0	0	1.16624	3.77785	1.13899	0	0	0	14.8806	8.46244	17.591	10.762	3.10316	2.24764	6.03597	4.11698	0.704574	2.31076
FBgn0025519	fidipidine	protein_coding	2R	2.12879	0	2.89116	2.57187	4.4691	5.98244	7.05635	7.45152	4.32737	3.06888	2.86429	3.7799	3.23703	0	1.58348	0	5.3395	3.23555	1.14596	1.38953	2.66446	7.65504	8.51703	10.0631	6.96928	5.82815	7.94124	6.12718	5.31995	10.0547	3.49871	6.61123	2.27798	4.72059	4.53295	1.30073	3.3068	1.0578	3.19837	5.381	0.775791	4.49528	1.20719	6.86164	7.04574	10.3984
FBgn0261068	LSm7	protein_coding	2L	0	3.07794	1.44558	1.71458	0	0.39883	0.784039	0.677411	0	1.84133	2.14822	1.88995	1.07901	1.21752	0	0	0.667438	0	0	0	0	0	0	0	0	0	1.76472	1.0212	4.25596	3.35157	2.33247	3.77785	1.13899	0	0	0	0	0	0	0	0.775791	0	0	0	0.704574	1.15538
FBgn0030873	CG15814	protein_coding	X	4.25759	10.7728	8.67348	5.14373	6.70365	6.38127	10.9766	8.12893	12.3639	14.1168	7.8768	12.2847	2.15802	6.08759	3.16697	11.7738	6.00694	4.85332	1.14596	11.1162	3.55261	0	2.12926	1.67718	1.39386	10.6849	7.94124	6.12718	7.44793	8.37891	11.6624	21.7226	3.98647	2.02311	4.53295	2.60145	6.61359	7.40463	11.1943	2.6905	4.65475	9.55248	6.03597	13.7233	9.86404	7.50996
FBgn0284081	CG46303	protein_coding	3R	0	0	0	0	0	0	0	0	0	0	0	0	0	0	0	0	0	0	0	0	0	0	0	0	0	0.971359	0	0	0	0	0	0	0	0	0	0	0	0	0	0	0	0	0	0	0	0
FBgn0030747	CG4301	protein_coding	X	0	0	0	0	0	0	0	0	0	0	0	0	0	0	0	1.9623	0	0.808887	0	0	0	0	0	1.67718	0	0.971359	0	0	0	0	0	0	0	0	0	0	0	0	0	0	0	0	0	0	0	0
FBgn0000316	cin	protein_coding	X	1.0644	3.07794	0	4.28645	3.72425	1.19649	7.84039	5.41929	4.94556	8.59286	11.4572	12.2847	5.39505	6.08759	7.91742	0	2.00231	1.61777	2.29192	2.77906	0.888152	1.27584	4.25852	0	0	2.91408	4.4118	5.10599	3.19197	8.37891	10.4961	5.66677	5.12546	4.04622	5.66619	5.2029	0	1.0578	0	2.6905	3.10316	2.80955	2.41439	1.37233	3.52287	8.66534
FBgn0037412	Osi4	protein_coding	3R	0	0	0	0	0	0	0	0	0	0	0	0	0	0	0	0	0	0	0	0	0	0	0	0	0	0	0	0	1.06399	0	0	0	0	0	0	0	0	0	0	0	0	0	0	0	0	0
FBti0062733		transposable_element	4	0	0	0	0	1.4897	0	0	0	0	0	0	0	0	0	0	0	0	0	0	0	0	0	0	0	0	0	0	0	0	0	0	0	0	0	0	0	0	0	0	0	0	0	0	0	0	0
FBti0062100		transposable_element	4	1.0644	0	0	0.857289	0	0	0	0	0	0	0	0.944975	0	0	0	0	0	0	0	0	0.888152	0	2.12926	0	0	0	0.88236	0	0	0	0	2.83338	0	1.34874	1.13324	0	0	0	0	2.6905	0	0	0	0	0.704574	0.577689
FBgn0031834	CG13766	protein_coding	2L	0	0	0	0	0	0	0	0.677411	0	0	0.716073	0.944975	0	0	0	0	0.667438	2.42666	0	0	0	0	0	0	0	1.94272	0	0	0	0	0	0	0	0	0	0	3.3068	0	0	0	0.775791	0.56191	0	0	0	0
FBgn0029093	cathD	protein_coding	2R	313.997	1241.95	795.069	828.141	224.2	198.617	208.554	247.932	40.8009	35.599	52.2733	54.8085	94.9529	126.622	139.347	123.625	836.3	772.487	652.052	686.427	730.949	364.89	743.111	367.302	354.039	380.773	359.121	334.953	63.8394	46.9219	80.4703	69.8901	81.4379	118.689	137.122	143.08	570.422	782.775	516.536	438.552	717.607	643.387	543.237	820.652	346.65	317.151
FBgn0004379	Klp67A	protein_coding	3L	0	0	0	0	0	1.19649	0	1.35482	0	0	0	0	0	0	0	0	0.667438	0	0	0	0	0	0	0	0	0	0.88236	0	0	0	0	0	0	0	0	0	0	0	0	0	0	0.56191	0	0	0	0
FBgn0037817	Cyp12e1	protein_coding	3R	32.9963	15.3897	18.7925	28.2905	0.74485	0	0	1.35482	1.23639	1.84133	2.14822	2.83492	7.55307	2.43504	3.16697	0	4.67207	1.61777	5.72981	4.16859	15.9867	16.5859	25.5511	13.4174	0	0	0.88236	0	10.6399	10.0547	6.99742	5.66677	7.40344	9.44117	4.53295	5.2029	8.26699	7.40463	3.19837	5.381	2.32737	6.18101	15.6935	5.48931	0	0.577689
RR48404_transposable_element		transposable_element	2R	0	0	0	0	0	0.39883	0	0	0	0	0.716073	0	0	0	0	0	0	0.808887	0	1.38953	0	0	0	0	0	0	0	0	0	0	0	0	0	0	0	0	0	0	0	0	0	0	0	0	0	0
FBgn0035356	CG16986	protein_coding	3L	1.0644	1.53897	0	0.857289	0.74485	0	0	0	0	1.22755	2.14822	0.944975	1.07901	1.21752	0	1.9623	0.667438	0	1.14596	2.77906	0	3.82752	0	3.35436	0	0	0.88236	0	2.12798	1.67578	0	2.83338	1.70849	0.674369	0	1.30073	0	0	1.59918	8.07151	0	0	1.20719	0	0	0
FBgn0262858	CG43222	protein_coding	3R	0	0	0	0	0	0	0	0	0	0	0.716073	0	0	0	0	0	0	0	0	0	0	0	0	0	0	0.971359	0	0	0	0	0	0	0	0	0	0	0	0	0	0	0	0	0	0	0	0
FBgn0052446	Atox1	protein_coding	3L	9.57958	12.3118	4.33674	12.8593	33.5182	24.3286	29.0095	30.4835	3.70917	3.68265	3.58036	4.72487	3.23703	1.21752	1.58348	5.8869	2.66975	5.66221	5.72981	0	12.4341	20.4134	21.2926	6.70872	32.0587	20.3985	35.2944	22.4663	6.38394	5.02735	3.49871	2.83338	2.27798	0.674369	2.26648	2.60145	1.6534	7.40463	1.59918	0	12.4127	12.9239	8.45036	8.23397	28.183	18.4861
FBgn0021856	l(2)k14505	protein_coding	2L	1.0644	3.07794	0	1.71458	3.72425	1.59532	2.35212	3.38705	3.70917	9.82041	5.72858	5.66985	11.8691	9.74015	4.75045	1.9623	4.00463	0.808887	1.14596	1.38953	2.66446	1.27584	6.38777	6.70872	9.75699	6.79951	6.17652	4.08479	3.19197	15.082	6.99742	11.3335	10.8204	10.7899	13.5989	24.7138	0	0	0	8.07151	1.55158	1.12382	2.41439	1.37233	7.04574	1.73307
FBgn0266689	lncRNA:CR45179	ncRNA	3L	0	0	0	0	2.23455	0.797659	0.784039	2.03223	3.09098	1.84133	2.14822	2.83492	0	0	1.58348	0	1.33488	0.808887	2.29192	0	0	0	0	0	11.1508	10.6849	5.29416	9.19078	5.31995	11.7305	2.33247	7.55569	0	0	1.13324	0	4.96019	2.11561	4.79755	2.6905	0	0	0	0	6.34117	3.46614
FBgn0032153	CG4537	protein_coding	2L	0	0	1.44558	0	0	0.39883	0	0	0.618195	0.613776	0.716073	0	0	0	0	0	0	0	0	0	0	0	0	0	1.39386	0	1.76472	0	0	0	0	2.83338	0.569496	0.674369	0	0	0	0	0	0	0.775791	0	1.20719	0	0	0
FBgn0015924	crq	protein_coding	2L	14.9016	10.7728	13.0102	18.0031	37.2425	37.0911	31.3616	38.6124	7.41834	11.048	12.8893	4.72487	11.8691	7.30511	3.16697	7.84919	19.3557	10.5155	14.8975	13.8953	5.32891	21.6893	17.0341	13.4174	43.2095	51.482	67.9417	40.8479	17.0238	18.4336	9.32989	7.55569	9.11193	12.1386	11.3324	16.9094	21.4942	15.8671	7.99592	5.381	20.9464	17.4192	6.03597	27.4466	62.7071	62.9681
FBgn0031700	CG14022	protein_coding	2L	15.966	4.61691	7.2279	3.42916	0	0.39883	0	0	0	0	0	0	19.4222	29.2204	36.4201	52.9821	43.3835	7.27999	9.16769	16.6743	1.7763	7.65504	10.6463	18.449	1.39386	0	0	0	0	0	0	0	25.6273	47.2059	39.6633	48.1268	3.3068	0	0	0	1.55158	7.30483	1.20719	2.74466	0	0
FBgn0265044	lncRNA:CR44161	ncRNA	2R	0	0	0	0	0	0	0	0	0	1.22755	0	0.944975	0	0	0	0	0	0	0	0	0	0	0	0	0	0	0	0	0	1.67578	3.49871	0	0	0	0	0	0	0	0	0	0	0	0	0	0	0.577689
FBgn0032205	CG4957	protein_coding	2L	0	0	0	0.857289	2.9794	0.39883	0.784039	1.35482	4.32737	3.06888	5.72858	4.72487	10.7901	15.8277	12.6679	9.81149	1.33488	0	0	0	3.55261	1.27584	2.12926	5.03154	1.39386	0.971359	0.88236	3.06359	5.31995	6.70313	3.49871	5.66677	11.3899	12.1386	10.1991	10.4058	0	2.11561	1.59918	2.6905	0	2.24764	4.82878	2.74466	3.52287	0.577689
FBti0063678		transposable_element	X	1.0644	0	0	0	0	0.797659	0	0	0	0	0	0	0	0	0	0	0	0	0	0	0	0	0	0	0	0	0	0	0	0	0	1.88892	0	0	0	0	0	0	0	0	0.775791	0	0	0	0	0
FBgn0004876	cdi	protein_coding	3R	7.45078	1.53897	1.44558	3.42916	35.0079	34.6982	22.7371	32.5157	11.1275	17.7995	14.3215	7.5598	25.8962	18.2628	26.9192	11.7738	24.6952	4.85332	4.58384	5.55812	6.21706	7.65504	2.12926	5.03154	32.0587	39.8257	44.118	38.8055	15.9599	16.7578	27.9897	31.1672	31.8917	29.6723	20.3983	28.616	18.1874	75.1041	9.5951	5.381	7.75791	1.12382	0	8.23397	33.115	42.749
FBgn0014037	Su(Tpl)	protein_coding	3L	69.1858	60.0198	37.5851	51.4373	72.2504	66.2057	79.188	56.9025	58.7286	66.9016	55.8537	50.0837	130.56	182.628	145.68	109.889	48.0555	29.1199	55.0061	30.5696	74.6048	65.0679	34.0681	50.3154	30.6648	41.7684	60.0005	46.9751	67.0314	60.3282	53.6469	60.4455	132.692	137.571	143.921	140.478	56.2155	55.0058	71.9633	48.429	62.0633	30.9051	39.8374	57.6378	50.0248	67.012
FBgn0030590	CG9518	protein_coding	X	0	0	0	0	0	0.39883	0	0	0	0	0	0	1.07901	2.43504	1.58348	0	0	0.808887	0	1.38953	0	0	0	0	0	0	0	1.0212	1.06399	1.67578	0	0	1.13899	0.674369	2.26648	0	1.6534	0	0	0	0	0	0	0	0	0.577689
FBti0060370		transposable_element	2L	0	0	0	0	0	0	0	0	0	0	0	0	0	0	0	0	0	0	0	0	0	0	0	0	0	0	0	0	0	0	1.16624	0	0	0	0	0	0	0	0	0	0	0	0	0	0	0
FBgn0039685	Obp99b	protein_coding	3R	8.51518	0	0	1.71458	3.72425	0.39883	0.784039	2.70964	1.23639	0	0.716073	0	0	3.65256	3.16697	5.8869	0	0.808887	0	0	4.44076	5.10336	2.12926	6.70872	1.39386	6.79951	9.70596	2.04239	2.12798	0	6.99742	3.77785	0.569496	2.69748	2.26648	5.2029	0	0	0	0	3.87895	2.24764	0	5.48931	0.704574	2.31076
FBti0060962		transposable_element	4	0	0	0	0	0	0	0	0	0	0	0	0	0	0	0	0	0	0	0	0	0	0	0	0	0	0	0	0	0	0	0	0	0	0	0	0	0	0	0	0	0	0	0	0	0	0
FBgn0039387	Mco3	protein_coding	3R	0	0	0	0	0	0	0	0	0	0	0	0	4.31604	1.21752	3.16697	9.81149	0	0	0	0	0	0	0	0	0	0	0	0	0	0	0	0	0	0	2.26648	0	0	0	0	0	0	0	0	0	0	0
FBgn0004117	Tm2	protein_coding	3R	5822.25	1008.02	2975	2165.51	5.21395	3.58947	0.784039	1.35482	310.334	301.978	295.738	370.43	3860.7	4431.77	4151.89	3439.91	931.076	1508.57	2845.42	1331.17	845.521	4066.1	1030.56	3964.85	16.7263	16.5131	8.8236	7.14838	326.645	325.102	311.385	334.339	3861.75	4036.77	4026.4	4344.42	2680.16	2032.04	4530.49	2526.38	186.19	822.075	3100.07	222.317	21.1372	10.3984
FBgn0031314	IntS14	protein_coding	2L	2.12879	4.61691	0	2.57187	2.23455	3.58947	7.05635	5.41929	9.27293	9.82041	10.025	5.66985	0	2.43504	1.58348	1.9623	0	0.808887	2.29192	0	0	1.27584	0	1.67718	8.36313	5.82815	2.64708	2.04239	7.44793	16.7578	10.4961	9.44461	1.70849	2.69748	3.39972	0	0	2.11561	1.59918	0	2.32737	3.37146	4.82878	0	4.22744	5.77689
RR48389_transposable_element		transposable_element	3L	0	0	0	0	0	0	0	0	0	0	0	0	0	0	0	0	0.667438	0.808887	0	0	0	0	0	0	0	0	0	0	0	0	0	0	0	0.674369	0	0	0	0	0	0	0	0	0	0	0	0
FBgn0051824	CR31824	pseudogene	2L	0	0	0	0	0	0	0	0	0	0	0	0	0	0	0	0	0	0	0	0	0	0	0	0	0	0	0	0	0	0	0	0	0	0	0	0	0	0	0	0	0	0	0	0	0.704574	0
FBti0063414		transposable_element	4	0	0	0	0	0	0	0	0	0	0	0	0	0	0	0	0	0	0	0	0	0	0	0	0	0	0	0	0	0	0	0	0	0	0	0	0	0	0	0	0	0	0	0	0	0	0
FBti0018873		transposable_element	2R	0	0	0	0	0	0	0	0	0	0	0	0	0	0	0	0	0	0	0	0	0	0	0	0	0	0	0	0	0	0	0	0	0	0	0	1.30073	0	0	0	0	0	0	0	0	0	0
FBgn0035878	CG7182	protein_coding	3L	3.19319	0	4.33674	2.57187	7.4485	4.78595	3.13616	6.77411	21.0186	23.9373	20.05	17.9545	5.39505	3.65256	6.33393	11.7738	2.00231	3.23555	2.29192	6.94764	3.55261	1.27584	2.12926	3.35436	1.39386	4.85679	2.64708	4.08479	20.2158	23.461	22.1585	26.4449	11.9594	13.4874	10.1991	10.4058	0	2.11561	0	2.6905	3.10316	5.05719	7.24316	5.48931	10.5686	9.82072
FBgn0037811	CG12592	protein_coding	3R	0	0	0	0	0	0	0	0	0.618195	0	0	0	0	0	0	0	0	0	0	0	0	0	0	0	1.39386	0	0	0	0	0	0	0	0	0	0	0	0	0	0	0	0	0	0	0	0	0
FBgn0034176	ste24a	protein_coding	2R	3.19319	1.53897	2.89116	3.42916	11.9176	11.1672	10.1925	12.8708	17.9277	16.5719	16.4697	15.1196	5.39505	3.65256	6.33393	5.8869	0	0	0	0	1.7763	7.65504	6.38777	0	16.7263	8.74223	19.4119	18.3816	14.8959	23.461	26.8234	32.1117	11.3899	21.5798	21.5315	19.5109	1.6534	1.0578	0	2.6905	4.65475	5.05719	3.62158	5.48931	16.2052	17.9084
FBgn0030837	CG8661	protein_coding	X	0	0	0	0	0	0	0	0	0	0	0	0	0	0	0	0	0	0	0	0	0	0	0	0	0	0	0	0	0	0	0	0	0	0	0	0	0	0	0	0	0	0	0	0	0	0
FBgn0041102	ocn	protein_coding	3R	0	0	0	0	0	0	0	0	0	0	0	0	0	0	0	0	0	0	0	0	0	0	2.12926	0	0	0	0	0	0	0	0	0	0	0	0	0	0	0	0	0	0	0	0	0	0	0
FBgn0030749	AnxB11	protein_coding	X	1.0644	0	0	0	3.72425	0.797659	1.56808	4.06446	0.618195	0	0	0	3.23703	1.21752	3.16697	0	0	0	1.14596	2.77906	0	0	0	0	2.78771	3.88544	5.29416	5.10599	0	0	0	0	1.13899	2.69748	3.39972	1.30073	0	0	0	0	2.32737	1.12382	1.20719	0	0.704574	2.31076
FBgn0035588	CG10672	protein_coding	3L	2.12879	1.53897	1.44558	3.42916	0	1.19649	0.784039	0	0.618195	2.4551	0.716073	0	4.31604	7.30511	3.16697	0	2.00231	2.42666	0	2.77906	0.888152	2.55168	0	3.35436	0	1.94272	1.76472	2.04239	2.12798	1.67578	0	0.944461	3.98647	4.04622	0	1.30073	0	1.0578	0	8.07151	0	0	4.82878	0	1.40915	0.577689
FBgn0035076	Ance-5	protein_coding	2R	0	0	1.44558	0	1.4897	1.19649	0.784039	0.677411	0.618195	0.613776	0.716073	0	0	3.65256	3.16697	1.9623	2.00231	4.04444	1.14596	2.77906	0	1.27584	0	0	0	3.88544	2.64708	3.06359	0	1.67578	1.16624	0	2.84748	4.72059	3.39972	1.30073	0	3.17341	1.59918	2.6905	0	0	0	0	0	2.31076
FBgn0287592	CG46462	protein_coding	3L	0	0	0	0	0	0	0	0	0	0	0	0	0	0	0	0	0	0	0	0	0	0	0	0	0	0	0	0	0	1.67578	0	0	0	0	0	0	0	0	0	0	0	0	0	0	0	0
FBgn0038354	CG5404	protein_coding	3R	0	0	0	0	0	0	0	0	0	0	0	0	0	0	0	0	0	0	0	0	0	0	0	0	0	0	0	0	0	0	0	0	0	0	0	0	0	0	0	0	0	0	0	0	0	0
FBti0020420		transposable_element	4	0	1.53897	1.44558	0	0	0	0	0	0	0	0	0	0	0	0	0	1.33488	0	0	0	1.7763	0	0	0	0	0.971359	0	0	0	0	0	0	1.13899	1.34874	1.13324	1.30073	0	1.0578	0	2.6905	1.55158	0.56191	0	0	0.704574	0.577689
FBti0062689		transposable_element	3L	0	0	0	0	0	0	0	0.677411	0	0	0	0	0	0	0	0	0	0	0	0	0	0	0	0	0	0	0	0	0	0	0	0	0	0	0	0	0	0	0	0	0	0	0	0	0	0
FBgn0027549	Nulp1	protein_coding	3L	21.2879	7.69484	20.2381	7.7156	10.4279	3.58947	10.9766	6.77411	6.80015	12.2755	4.29644	7.5598	9.71109	9.74015	6.33393	11.7738	4.67207	1.61777	4.58384	4.16859	12.4341	6.3792	21.2926	8.3859	11.1508	6.79951	3.52944	4.08479	8.51192	26.8125	8.16366	10.3891	11.3899	7.41806	6.79943	7.80435	1.6534	5.28902	3.19837	5.381	15.5158	14.6097	10.8647	2.74466	5.63659	4.62152
FBgn0037834	Art1	protein_coding	3R	5.32199	7.69484	7.2279	9.43018	8.19335	11.5661	11.7606	10.1612	21.6368	30.6888	22.9143	26.4593	5.39505	8.52263	11.0844	9.81149	16.0185	14.56	13.7515	9.7267	10.6578	10.2067	23.4218	1.67718	9.75699	13.599	13.2354	17.3604	27.6637	41.8946	29.1559	48.1675	5.12546	4.04622	3.39972	1.30073	14.8806	9.52024	20.7894	13.4525	17.0674	14.0478	10.8647	20.5849	15.5006	17.3307
FBgn0086673	CG13272	protein_coding	2L	0	0	0	2.57187	0	0	0	0	0	0	0	0	0	1.21752	0	1.9623	0	0	0	0	0	0	0	0	0	0	0	0	1.06399	0	0	0.944461	0	0	0	0	0	0	0	0	0	0	1.20719	2.74466	0	0
FBgn0265070	asRNA:CR44181	ncRNA	2L	0	0	0	0	0	0	0	0	0	0	0	0	0	0	0	0	0	0	0	0	0	0	0	0	0	0	0	0	0	0	0	0	0	0	0	0	0	0	0	0	0	0	0	0	0	0
FBgn0267598	lncRNA:CR45936	ncRNA	3L	0	0	0	0	0	0	0	0	0	0	0	0	0	0	0	0	0	0	0	0	0	0	0	0	1.39386	0.971359	0	0	1.06399	0	0	0	0	0	0	0	0	0	0	0	0	0	0	0	0	0
FBgn0052220	Csas	protein_coding	3L	0	0	0	0	0	0	0	0	0	0	0	0	0	0	0	0	0	0	0	0	0	0	0	0	0	0	0	0	0	0	0	0	0	0	0	0	0	0	0	0	0	0	0	0	0	0
FBgn0287612	lncRNA:CR46481	ncRNA	2R	0	0	0	0	0.74485	1.19649	0.784039	1.35482	0	0	0	0	0	0	0	0	0.667438	0	0	0	0	0	0	0	2.78771	0.971359	0	0	0	0	0	0	0	0	0	0	3.3068	0	0	0	0.775791	0	0	1.37233	4.93202	4.62152
FBgn0000723	FER	protein_coding	3R	24.4811	4.61691	20.2381	14.5739	5.21395	4.78595	3.13616	5.41929	19.7822	15.9582	16.4697	22.6794	32.3703	37.7431	33.2532	19.623	19.3557	9.70665	12.6056	8.33717	7.99337	17.8618	12.7755	25.1577	4.18157	4.85679	3.52944	7.14838	24.4718	28.4883	16.3273	12.278	38.7257	35.7416	41.9298	33.8189	9.92039	2.11561	3.19837	5.381	3.10316	15.1716	18.1079	8.23397	4.22744	6.93227
FBgn0051030	CG31030	protein_coding	3R	1.0644	0	0	0	0	0.797659	0	0.677411	0	0	0	0	1.07901	0	0	0	0	0	0	0	0	0	0	0	0	0	0.88236	0	0	0	0	0	0	0	0	0	0	1.0578	0	0	0	0	0	0	0	0
FBgn0032399	CG6785	protein_coding	2L	1.0644	0	0	0.857289	0	0	0	0	0	0	0.716073	0	0	0	0	0	0	0	0	0	0	0	2.12926	0	0	0	0	0	0	0	0	0	0	0	0	0	1.6534	0	0	0	0	0	0	0	0.704574	0
FBgn0038199	CCHa1	protein_coding	3R	0	0	0	0	0	0	0	0	0	0	0	0	0	0	0	0	0	0	0	0	0	0	0	0	0	0	0	0	0	0	0	0	0	0	0	0	0	0	0	0	0	0	0	0	0	0
FBgn0040228	DCTN5-p25	protein_coding	2L	4.25759	1.53897	2.89116	1.71458	2.9794	1.99415	2.35212	3.38705	1.23639	0.613776	1.43215	0	1.07901	0	0	0	16.0185	5.66221	12.6056	15.2848	2.66446	0	2.12926	1.67718	1.39386	1.94272	1.76472	1.0212	3.19197	1.67578	2.33247	0	1.70849	0	4.53295	1.30073	6.61359	5.28902	3.19837	8.07151	0.775791	0.56191	1.20719	1.37233	0.704574	2.31076
FBgn0037313	CG1161	protein_coding	3R	22.3523	38.4742	24.5749	36.0061	44.691	34.6982	41.5541	36.5802	15.4549	15.9582	9.30895	14.1746	31.2913	21.9153	17.4183	41.2083	47.3881	35.591	38.9627	27.7906	40.855	16.5859	53.2314	23.4805	51.5726	57.3102	38.8239	36.7631	35.1117	26.8125	32.6546	21.7226	27.3358	27.6491	30.5974	26.0145	31.4146	48.659	38.3804	32.286	27.1527	24.1621	36.2158	39.7975	40.8653	40.4383
FBti0060342		transposable_element	2R	0	1.53897	0	0	2.23455	1.99415	0.784039	0.677411	0.618195	0.613776	0	2.83492	0	0	0	0	2.00231	2.42666	0	1.38953	0	0	0	0	5.57542	1.94272	0.88236	1.0212	0	0	1.16624	0	0	0	0	0	1.6534	3.17341	3.19837	0	0	0	0	1.37233	4.22744	1.73307
FBgn0265296	Dscam2	protein_coding	3L	0	0	0	0	0	0	0	0	0	0	0	0	1.07901	0	0	5.8869	0	0	0	0	0.888152	0	0	0	0	0	0	0	0	0	2.33247	0	0	0	0	0	0	0	0	2.6905	0	1.12382	0	0	0	0
FBgn0085295	CG34266	protein_coding	3L	0	0	0	0	0	0	0	0	0	0	0	0	0	0	0	0	0	0	0	0	0	0	0	0	0	0	0	0	0	0	0	0	0	0	0	0	0	0	0	0	0	0	0	0	0	0
FBgn0030744	CG9992	protein_coding	X	1.0644	7.69484	4.33674	1.71458	4.4691	2.39298	3.13616	5.41929	1.23639	1.22755	0.716073	0.944975	1.07901	1.21752	0	0	0.667438	1.61777	3.43788	1.38953	4.44076	0	8.51703	0	5.57542	5.82815	1.76472	5.10599	2.12798	1.67578	1.16624	0	0	1.34874	2.26648	2.60145	1.6534	1.0578	0	0	0	2.80955	1.20719	0	2.8183	2.88845
FBgn0263345	asRNA:CR43426	ncRNA	3L	0	0	0	0	0	0.797659	1.56808	0	0.618195	0	0	0	0	0	0	0	0.667438	0	0	0	0	0	0	0	0	0	0	0	1.06399	0	0	0	0	0	0	0	0	0	0	0	0	0	0	1.37233	0.704574	0.577689
FBgn0037890	CG17734	protein_coding	3R	80.8942	0	8.67348	10.2875	3.72425	1.99415	1.56808	5.41929	2.47278	3.68265	5.01251	9.44975	14.0271	15.8277	14.2514	17.6607	62.0717	72.7999	110.012	87.5403	1.7763	16.5859	2.12926	5.03154	0	4.85679	3.52944	6.12718	3.19197	8.37891	3.49871	11.3335	8.54243	11.4643	4.53295	13.0073	72.7495	74.0463	113.542	118.382	1.55158	3.93337	18.1079	6.86164	6.34117	4.62152
FBti0062208		transposable_element	2L	156.466	29.2404	70.8334	46.2936	21.6006	15.1555	22.7371	14.2256	38.9463	12.8893	6.44466	17.0095	28.0543	60.8759	31.6697	19.623	21.358	49.3421	26.3571	48.6335	53.2891	35.7235	31.9389	87.2133	32.0587	26.2267	17.6472	12.2544	48.9436	21.7852	15.1611	28.3338	50.6851	63.3907	46.4628	22.1123	66.1359	47.6012	51.1739	88.7866	151.279	37.0861	141.242	123.51	90.8901	70.4781
FBgn0039350	jigr1	protein_coding	3R	8.51518	0	1.44558	0	9.68304	10.7684	14.1127	14.2256	9.89112	6.13776	9.30895	5.66985	2.15802	1.21752	3.16697	5.8869	2.66975	0.808887	2.29192	1.38953	0	5.10336	0	0	8.36313	6.79951	14.1178	12.2544	11.7039	10.0547	4.66495	2.83338	5.69496	4.04622	3.39972	6.50363	1.6534	5.28902	1.59918	0	0	0.56191	4.82878	1.37233	19.0235	12.7092
FBgn0037546	mAChR-B	protein_coding	3R	0	0	0	0	0	0	0	0	0	0	0	0	0	0	0	0	0	0	0	0	0	0	0	0	0	0	0	0	0	0	0	0	0	0	0	0	0	1.0578	0	0	0	0	0	0	0	0
FBgn0011761	dhd	protein_coding	X	0	0	0	0	0	0	0	0	0	0	0	0	0	0	0	0	0	0	0	0	0	0	0	0	0	0	0	0	1.06399	0	1.16624	0	0	0	1.13324	0	0	0	0	0	0	0	0	0	0	0
FBgn0015781	P5cr	protein_coding	3R	0	0	0	0	0	0	0	0	0	0	0	0.944975	2.15802	1.21752	1.58348	1.9623	0	1.61777	0	0	0	0	0	0	0	0.971359	0	0	0	0	0	0	1.13899	0.674369	1.13324	0	0	0	0	2.6905	0	0.56191	0	0	0	0
FBgn0053294	CR33294	pseudogene	3R	0	0	0	0	0	0	0	0	0	0	0	0	0	0	0	0	0	0	0	1.38953	0	0	0	0	0	0	0	0	0	0	0	0.944461	0	0	0	0	0	0	0	0	0	0	0	0	0	0
FBgn0267707	lncRNA:CR46040	ncRNA	3R	0	0	0	0	0	0	0	0	0	0	0	0	0	0	0	0	0	0	0	0	0	0	0	0	0	0	0	0	0	0	0	0	0	0	0	0	0	0	0	0	0	0	0	0	0	0
FBgn0000114	bru1	protein_coding	2L	1.0644	0	0	0.857289	3.72425	1.19649	0	0	0	0.613776	0.716073	0	10.7901	2.43504	4.75045	13.7361	8.00926	3.23555	3.43788	11.1162	0	0	0	0	1.39386	0	0.88236	0	0	0	0	0	7.40344	5.39495	9.06591	5.2029	1.6534	1.0578	0	29.5955	0	0	0	1.37233	0	0.577689
FBgn0051955	CG31955	protein_coding	2L	0	0	0	0.857289	3.72425	4.38712	4.70424	6.0967	0	1.22755	1.43215	0	1.07901	1.21752	3.16697	1.9623	0.667438	0.808887	0	0	0.888152	0	2.12926	0	9.75699	9.71359	3.52944	5.10599	1.06399	1.67578	1.16624	0.944461	0	0	0	0	3.3068	3.17341	4.79755	5.381	0	1.12382	2.41439	0	2.8183	2.88845
FBgn0015794	Rab18	protein_coding	X	10.644	9.23381	17.347	10.2875	7.4485	3.19064	10.1925	9.48375	2.47278	5.52398	5.72858	2.83492	2.15802	3.65256	6.33393	3.9246	14.0162	21.0311	16.0435	18.0639	15.0986	6.3792	14.9048	16.7718	5.57542	5.82815	8.8236	11.2332	11.7039	5.02735	5.83118	5.66677	6.26445	16.1849	6.79943	7.80435	8.26699	13.7515	9.5951	16.143	10.8611	14.6097	9.65755	20.5849	5.63659	5.1992
FBgn0034157	resilin	protein_coding	2R	0	0	0	0	0	0	0	0	0	0	0	0	1.07901	0	0	0	0	0	0	0	0	0	0	0	0	0	0	0	0	0	0	0	0	0	0	0	0	0	0	0	0	0	0	0	0	0
FBgn0015838	Vang	protein_coding	2R	7.45078	12.3118	4.33674	6.00102	32.7734	30.7099	24.3052	20.9997	22.8732	25.1648	22.1983	18.8995	9.71109	10.9577	3.16697	5.8869	3.33719	0	1.14596	0	10.6578	6.3792	4.25852	3.35436	13.9386	10.6849	14.1178	11.2332	19.1518	16.7578	15.1611	17.0003	7.40344	6.06932	5.66619	6.50363	1.6534	6.34683	4.79755	5.381	10.8611	8.42866	2.41439	12.351	12.6823	17.9084
FBgn0032514	CG9302	protein_coding	2L	3.19319	3.07794	1.44558	7.7156	13.4073	5.98244	14.1127	5.41929	0.618195	4.29643	5.72858	1.88995	5.39505	2.43504	0	3.9246	0	0	0	0	0	5.10336	2.12926	1.67718	5.57542	3.88544	1.76472	1.0212	3.19197	3.35157	3.49871	1.88892	0	0.674369	0	0	0	1.0578	0	0	0	1.68573	1.20719	0	2.11372	1.73307
FBti0019494		transposable_element	4	0	1.53897	0	0.857289	0.74485	0.797659	0.784039	1.35482	0	0.613776	0	0	1.07901	0	0	0	3.33719	0.808887	1.14596	4.16859	1.7763	0	2.12926	0	1.39386	1.94272	0	1.0212	0	0	0	0.944461	0	0	0	1.30073	4.96019	2.11561	1.59918	0	0.775791	1.12382	0	0	0	1.15538
FBgn0050403	CG30403	protein_coding	2R	1.0644	0	1.44558	0	0.74485	0	0	0	0	0	0	0	0	0	0	0	0.667438	0	0	0	0	0	0	0	0	0	0	0	0	0	0	0	0	0	0	0	0	0	0	0	0	0	0	0	0	0.577689
FBgn0267963	lncRNA:CR46243	ncRNA	X	0	0	0	0	0	0	0	0	0	0	0	0	0	0	0	0	0	0	0	0	0	0	0	0	0	0	0	0	0	0	1.16624	0	0	0	0	0	0	0	0	0	0	0	0	0	0	0
FBgn0031791	AANATL2	protein_coding	2L	5.32199	6.15588	14.4558	24.0041	0	0.797659	0	0	0	0	0	0	0	0	0	3.9246	4.00463	1.61777	5.72981	1.38953	0.888152	22.9651	8.51703	3.35436	0	0	1.76472	0	0	0	1.16624	0	0	0	0	0	1.6534	1.0578	0	5.381	0	3.93337	3.62158	0	0	0
FBgn0002522	lab	protein_coding	3R	0	0	0	0	0	0	0	0	0	0	0	0	0	0	0	0	0	0	0	0	0	0	0	0	0	0	0	0	0	0	0	0	0	0	0	0	0	0	0	0	0	0	0	0	0	0
FBgn0265452	lncRNA:CR44352	ncRNA	2L	0	0	0	0	0	0	0	0	0	0	0	0	0	0	0	0	0	0	0	0	0	0	0	0	0	0	0	0	0	0	0	0	0	0	0	0	0	0	0	0	0	0	0	0	0	0
FBgn0054039	CG34039	protein_coding	3L	4.25759	1.53897	0	0.857289	1.4897	2.79181	1.56808	1.35482	3.09098	1.22755	2.14822	0.944975	2.15802	3.65256	0	3.9246	3.33719	2.42666	2.29192	4.16859	0.888152	0	0	0	1.39386	1.94272	0	0	2.12798	1.67578	0	1.88892	1.13899	0.674369	1.13324	1.30073	4.96019	0	0	2.6905	0	0.56191	0	0	1.40915	1.15538
FBgn0030704	CG15916	protein_coding	X	4.25759	0	0	2.57187	0	0.797659	1.56808	1.35482	0.618195	0.613776	0	0	0	0	0	1.9623	0.667438	4.04444	4.58384	4.16859	1.7763	2.55168	0	0	2.78771	0.971359	0	0	0	1.67578	1.16624	0.944461	1.70849	0.674369	0	3.90218	1.6534	5.28902	3.19837	2.6905	2.32737	1.68573	3.62158	1.37233	2.11372	0.577689
FBgn0267668	lncRNA:CR46006	ncRNA	3L	2.12879	15.3897	5.78232	1.71458	33.5182	37.49	18.8169	18.2901	6.18195	10.4342	4.29644	2.83492	11.8691	7.30511	3.16697	9.81149	4.67207	2.42666	1.14596	4.16859	10.6578	0	10.6463	0	9.75699	14.5704	18.5296	7.14838	5.31995	0	3.49871	0.944461	1.70849	6.06932	1.13324	3.90218	3.3068	4.23122	4.79755	5.381	1.55158	0.56191	1.20719	1.37233	9.15946	3.46614
FBgn0266815	lncRNA:CR45277	ncRNA	2R	0	0	0	0	0	0	0	0	0	0	0	0	0	0	0	0	0	0	0	0	0	0	0	0	0	0	0	0	0	0	0	0	0	0	0	0	0	0	0	0	0	0.56191	0	0	0	0
FBgn0263111	cac	protein_coding	X	0	0	0	0	0	1.19649	2.35212	0	0	0	0	0	1.07901	0	0	0	0	0	0	0	0	0	0	0	1.39386	0	0	0	0	0	0	0	0	0	0	3.90218	1.6534	1.0578	0	2.6905	0	0	0	0	0.704574	0
FBgn0261873	sdt	protein_coding	X	2.12879	0	1.44558	3.42916	13.4073	19.5426	14.1127	9.48375	0	1.22755	0.716073	0	2.15802	2.43504	1.58348	3.9246	8.00926	11.3244	12.6056	8.33717	1.7763	2.55168	0	0	8.36313	9.71359	5.29416	13.2756	2.12798	1.67578	1.16624	0	1.70849	2.02311	0	1.30073	3.3068	5.28902	6.39673	2.6905	3.87895	1.12382	1.20719	0	5.63659	7.50996
FBgn0265011	Np	protein_coding	2R	0	0	0	0	8.19335	4.78595	4.70424	10.1612	0	0	0.716073	0	0	0	0	0	0	0	0	0	0	0	4.25852	0	4.18157	1.94272	2.64708	2.04239	0	0	0	0	0	0	0	0	0	0	0	0	0	0.56191	0	0	3.52287	3.46614
FBgn0267267	lncRNA:CR45703	ncRNA	2L	0	0	0	0	0	0	0	0	0	0	0	0	0	0	0	0	0	0	0	0	0	0	0	0	0	0	0	0	0	1.67578	0	0	0	0	0	0	0	0	0	0	0	0	0	0	0	0
FBgn0015399	kek1	protein_coding	2L	0	4.61691	1.44558	0.857289	16.3867	16.352	12.5446	16.9353	0	1.22755	0	0	8.63208	0	3.16697	1.9623	2.00231	3.23555	0	0	0	5.10336	4.25852	0	12.5447	5.82815	15.0001	2.04239	1.06399	0	0	0	6.26445	2.02311	9.06591	2.60145	0	1.0578	0	2.6905	0.775791	0	4.82878	0	11.9778	11.5538
FBgn0035867	CG13671	protein_coding	3L	5.32199	4.61691	23.1293	6.00102	4.4691	4.78595	4.70424	4.06446	5.56376	7.36531	4.29644	11.3397	7.55307	3.65256	7.91742	1.9623	7.34182	4.04444	1.14596	0	3.55261	3.82752	0	1.67718	16.7263	8.74223	7.05888	4.08479	2.12798	8.37891	6.99742	2.83338	7.40344	2.69748	5.66619	1.30073	4.96019	10.578	1.59918	2.6905	9.30949	15.7335	2.41439	5.48931	8.45489	12.1315
FBgn0052425	CG32425	protein_coding	3L	6.38638	9.23381	5.78232	5.14373	14.1521	6.7801	14.1127	8.12893	38.9463	42.9643	47.9769	44.4138	51.7925	40.1781	63.3393	141.285	7.34182	2.42666	6.87577	0	6.21706	0	0	1.67718	6.96928	2.91408	15.0001	2.04239	40.4316	43.5703	45.4832	35.8895	16.5154	19.5567	13.5989	19.5109	8.26699	5.28902	4.79755	8.07151	9.30949	5.6191	3.62158	4.11698	11.9778	8.08765
FBgn0037737	Pnn	protein_coding	3R	0	0	4.33674	2.57187	4.4691	2.79181	1.56808	14.2256	8.65473	7.36531	5.72858	3.7799	1.07901	2.43504	0	7.84919	2.66975	2.42666	8.02173	4.16859	5.32891	2.55168	6.38777	1.67718	6.96928	4.85679	5.29416	3.06359	9.57591	5.02735	5.83118	6.61123	2.84748	5.39495	0	2.60145	0	0	0	0	3.10316	1.12382	4.82878	2.74466	3.52287	2.88845
FBgn0035110	thoc7	protein_coding	3L	0	3.07794	4.33674	1.71458	3.72425	3.19064	6.27232	6.0967	3.70917	2.4551	3.58036	1.88995	3.23703	1.21752	6.33393	1.9623	6.67438	6.4711	6.87577	4.16859	2.66446	2.55168	0	0	6.96928	4.85679	4.4118	6.12718	4.25596	5.02735	5.83118	3.77785	3.41697	4.72059	6.79943	6.50363	9.92039	0	4.79755	2.6905	1.55158	5.05719	2.41439	2.74466	8.45489	2.88845
FBgn0051551	CG31551	protein_coding	3R	0	0	0	0	0	0	0	0	0	0	0	0	0	0	0	0	0	0.808887	0	0	0	0	0	0	0	0	0	0	0	0	0	0	0	0	0	0	0	0	0	0	0	0	0	0	0	0
FBgn0040348	CG3703	protein_coding	X	0	0	0	0	0	0	0	0	0	0	0	0	0	0	0	0	0	0	0	0	0	0	0	0	0	0	0	0	0	0	0	0	0	0	0	0	0	0	1.59918	0	0	0	0	0	0	0
FBgn0051514	asRNA:CR31514	ncRNA	3R	0	0	1.44558	0	0.74485	0	0	0	13.6003	4.29643	9.30895	11.3397	0	0	0	1.9623	0.667438	0	0	1.38953	0	0	0	3.35436	0	0	0	0	7.44793	1.67578	8.16366	4.72231	0	2.02311	0	2.60145	0	3.17341	0	5.381	0	0	0	0	0.704574	0.577689
FBgn0010660	Nup214	protein_coding	2R	2.12879	6.15588	1.44558	3.42916	21.6006	17.1497	18.0329	12.1934	34.6189	24.551	23.6304	21.7344	7.55307	3.65256	1.58348	7.84919	11.3464	3.23555	2.29192	2.77906	0.888152	2.55168	2.12926	1.67718	2.78771	6.79951	8.8236	14.2968	8.51192	11.7305	11.6624	10.3891	2.84748	1.34874	1.13324	0	4.96019	8.46244	3.19837	5.381	2.32737	1.68573	2.41439	4.11698	7.04574	9.82072
FBgn0266275	asRNA:CR44960	ncRNA	X	0	0	0	0	0	0	0	0	0	0	0	0	0	0	3.16697	0	0	0	0	0	0	0	0	0	0	0	0	0	1.06399	0	0	0	0	0.674369	0	0	0	0	0	0	0	0	0	0	0	0
FBgn0040843	CG15213	protein_coding	3L	0	0	0	0	4.4691	3.9883	3.9202	4.74187	0	0	0	0	0	0	0	0	0	0	0	0	0	0	0	0	9.75699	3.88544	3.52944	3.06359	0	0	0	0	0	0	0	1.30073	0	0	0	2.6905	0	0	0	0	3.52287	4.04383
FBti0061961		transposable_element	3L	0	0	0	0	0	0	0	0	0	0	0	0	0	0	0	0	0	0	0	0	0	0	0	0	0	0	0	0	0	0	0	0	0	0	0	0	0	0	1.59918	0	0	0	0	0	0	0
FBti0019380		transposable_element	3R	1.0644	0	0	0	0	0	0	0	0	0	0	0	0	1.21752	0	0	0	0	0	0	0	0	0	0	0	0	0	0	0	1.67578	0	0	0	0	0	1.30073	0	0	0	0	0	0	0	0	0	0
FBgn0005695	gcl	protein_coding	2R	8.51518	10.7728	13.0102	11.1448	24.58	18.3462	25.0893	23.7094	7.41834	6.75153	7.8768	14.1746	1.07901	0	4.75045	5.8869	21.358	12.9422	18.3354	23.622	18.6512	5.10336	6.38777	16.7718	19.514	22.3413	22.059	21.4451	10.6399	15.082	10.4961	8.50015	10.2509	3.37185	2.26648	10.4058	13.2272	20.0983	14.3927	10.762	17.8432	21.3526	19.3151	19.2126	23.9555	19.0637
FBgn0039215	CG6695	protein_coding	3R	1.0644	7.69484	1.44558	4.28645	5.21395	7.17893	6.27232	6.0967	12.3639	10.4342	7.8768	16.0646	5.39505	2.43504	4.75045	7.84919	4.00463	4.04444	3.43788	0	3.55261	6.3792	2.12926	1.67718	8.36313	8.74223	7.05888	11.2332	10.6399	15.082	11.6624	15.1114	3.41697	5.39495	0	2.60145	0	6.34683	1.59918	8.07151	4.65475	8.42866	9.65755	6.86164	3.52287	5.1992
FBgn0036474	Or71a	protein_coding	3L	0	0	0	0	0	0	0	0	0	0	0	0	0	1.21752	1.58348	1.9623	0	0	0	0	0	0	0	0	0	0.971359	0	0	0	0	1.16624	0	0	0	0	0	0	0	0	0	0	0	0	0	0	0
FBgn0026379	Pten	protein_coding	2L	2.12879	6.15588	1.44558	1.71458	4.4691	8.77425	5.48828	6.0967	3.70917	7.36531	4.29644	3.7799	4.31604	3.65256	6.33393	3.9246	5.3395	1.61777	2.29192	4.16859	2.66446	2.55168	2.12926	0	1.39386	5.82815	7.94124	2.04239	3.19197	5.02735	5.83118	7.55569	2.27798	1.34874	7.93267	2.60145	0	6.34683	1.59918	0	2.32737	1.68573	0	0	4.93202	10.3984
FBgn0032805	CG10337	protein_coding	2L	0	1.53897	0	0	0	0	0	0	0	0	0	0	0	0	0	0	1.33488	0	1.14596	0	0	0	0	1.67718	0	0	0	0	0	0	0	0	0.569496	0	0	0	1.6534	1.0578	1.59918	0	0	0	0	0	0	0
FBti0059961		transposable_element	X	0	0	0	0	0	0	0.784039	0	0	0	0	0	0	0	0	0	0	0	0	0	0	0	0	0	0	0	0	0	0	0	0	0	0	0	0	0	0	0	0	0	0	0	0	0	0	0
FBgn0036594	CG13047	protein_coding	3L	0	0	0	0	0	0.797659	0	0	0	0	0	0.944975	23.7382	57.2234	66.5063	88.3034	2.00231	0.808887	2.29192	1.38953	0	0	0	0	0	0	0	0	0	0	0	0	11.9594	51.9264	9.06591	14.308	0	0	0	0	0	0	0	0	0	1.73307
FBti0061463		transposable_element	2R	0	0	0	0	0	0.39883	0	0	0	0	0	0	0	0	0	0	0	0	0	0	0	0	0	0	0	0	0	0	0	0	0	0	0	0	0	0	0	0	0	0	0	0	0	0	0	0
FBgn0052507	CG32507	protein_coding	X	0	0	0	0	0	0	0	0	0	0	0	0	0	0	0	0	0	0	0	0	0	0	0	0	0	0	0.88236	0	0	0	0	0	0	0	0	0	0	0	0	0	0	0	0	0	0	0
FBgn0085354	CG34325	protein_coding	X	17.0304	9.23381	13.0102	11.1448	0.74485	0	0.784039	0	1.23639	1.22755	0.716073	0.944975	2.15802	6.08759	7.91742	17.6607	20.6906	27.5022	21.7733	23.622	3.55261	8.93088	4.25852	16.7718	0	0	0	0	0	0	1.16624	0.944461	0	2.02311	2.26648	0	6.61359	3.17341	4.79755	2.6905	3.10316	6.18101	8.45036	5.48931	0	0.577689
FBgn0029094	asf1	protein_coding	3L	6.38638	3.07794	8.67348	6.85831	21.6006	11.5661	21.9531	22.3546	12.3639	7.97908	15.7536	6.61482	9.71109	2.43504	3.16697	3.9246	4.67207	5.66221	4.58384	4.16859	3.55261	3.82752	2.12926	5.03154	26.4833	22.3413	21.1766	19.4028	14.8959	16.7578	15.1611	7.55569	3.98647	6.74369	10.1991	14.308	9.92039	3.17341	6.39673	8.07151	5.43054	4.49528	3.62158	4.11698	10.5686	20.2191
FBti0018994		transposable_element	2R	0	0	0	0	0	0	0	0	0	0	0	0	0	0	0	0	0	0	0	0	0	0	2.12926	0	0	0	0	0	0	0	0	0	0	0	0	0	0	0	0	0	0	0	0	0	0	0
FBgn0035544	CG15021	protein_coding	3L	0	0	0	0	0	0	0	0	0	0	0	0.944975	0	0	0	3.9246	0.667438	0	0	0	0	0	0	0	0	0	0	0	0	0	0	0	1.70849	0.674369	0	0	0	0	0	0	0	0	2.41439	0	0	0
FBgn0032125	Cpr30B	protein_coding	2L	0	0	0	0	0	0.39883	0	0	0	0	0	0	111.138	144.885	167.849	227.627	0	0	0	0	0	0	0	0	0	0	0.88236	0	1.06399	0	0	0	134.97	100.481	88.3926	132.674	0	0	0	0	0	0	0	0	0	0.577689
FBgn0264901	lncRNA:CR44092	ncRNA	3R	0	0	0	0	0.74485	0	0	0	0	0	0	0	0	0	0	0	0	0	0	0	0	0	0	0	0	0	0	0	0	0	0	0	0	0	0	0	0	0	0	0	0	0	0	0	0	0
FBgn0037943	CG14722	protein_coding	3R	10.644	4.61691	10.1191	1.71458	10.4279	5.98244	10.1925	8.80634	15.4549	11.6617	8.59287	17.0095	12.9481	8.52263	7.91742	13.7361	6.00694	4.04444	0	11.1162	2.66446	1.27584	6.38777	6.70872	9.75699	5.82815	7.94124	11.2332	11.7039	15.082	20.9923	20.7782	9.11193	11.4643	14.7321	5.2029	1.6534	0	4.79755	8.07151	6.20633	7.86674	10.8647	8.23397	7.75031	9.82072
FBgn0023214	edl	protein_coding	2R	0	4.61691	1.44558	0	3.72425	4.78595	2.35212	4.06446	4.32737	3.68265	1.43215	7.5598	2.15802	3.65256	0	1.9623	6.00694	3.23555	11.4596	6.94764	7.10522	0	2.12926	0	9.75699	2.91408	4.4118	8.16958	3.19197	3.35157	4.66495	2.83338	0	1.34874	0	0	8.26699	3.17341	12.7935	10.762	5.43054	0	0	12.351	6.34117	8.66534
FBgn0038478	cal1	protein_coding	3R	0	0	1.44558	0	0	3.19064	2.35212	6.0967	3.70917	1.22755	2.14822	0.944975	0	1.21752	0	0	0	1.61777	0	2.77906	0.888152	2.55168	0	0	0	0	2.64708	2.04239	0	0	0	0	1.13899	1.34874	1.13324	1.30073	1.6534	3.17341	0	0	0.775791	1.68573	0	0	4.22744	4.04383
FBgn0029590	CG14811	protein_coding	X	0	0	0	0	0	0	0	0	0	0	0	0	0	0	0	0	0	0	0	0	0	0	0	0	1.39386	0	0	0	0	0	0	0	0	0	0	0	0	0	0	0	0	0	0	0	0	0.577689
FBgn0260446	GABA-B-R1	protein_coding	2L	0	0	0	0	0	0	0	0	0.618195	0	0	0	0	0	0	0	0	0	0	0	0	0	0	0	0	0	0.88236	1.0212	0	0	0	0	0	0	0	0	0	0	0	0	0.775791	0.56191	0	0	0	0
FBgn0032101	CG9586	protein_coding	2L	13.8372	9.23381	7.2279	12.8593	14.1521	15.1555	14.1127	10.8386	27.2006	20.2546	15.7536	14.1746	20.5012	10.9577	28.5027	21.5853	8.00926	7.27999	3.43788	9.7267	7.10522	6.3792	17.0341	13.4174	15.3324	7.77087	10.5883	9.19078	30.8557	16.7578	12.8286	28.3338	17.6544	15.5105	14.7321	14.308	0	5.28902	9.5951	8.07151	3.87895	6.74292	10.8647	9.6063	9.86404	8.08765
FBgn0028515	EndoGI	protein_coding	2L	11.7084	4.61691	7.2279	8.57289	4.4691	5.58361	5.48828	8.80634	3.70917	4.29643	5.72858	8.50477	6.47406	7.30511	4.75045	7.84919	4.00463	3.23555	6.87577	1.38953	15.9867	8.93088	14.9048	13.4174	16.7263	5.82815	6.17652	10.212	7.44793	8.37891	4.66495	5.66677	13.0984	7.41806	14.7321	13.0073	0	4.23122	3.19837	2.6905	3.87895	7.86674	13.2791	4.11698	7.75031	4.62152
FBgn0028684	Rpt5	protein_coding	3R	45.7691	83.1043	108.418	103.732	32.0285	27.1204	31.3616	44.7091	5.56376	3.68265	9.30895	13.2296	18.3432	23.1328	22.1688	19.623	239.61	183.617	142.099	220.935	236.248	79.1021	202.279	87.2133	44.6034	53.4247	57.3534	65.3566	14.8959	13.4063	18.6598	14.1669	60.3665	68.1113	86.1261	53.3297	249.663	212.619	265.464	161.43	259.89	189.364	156.935	252.508	41.5699	54.3028
FBgn0030850	stas	protein_coding	X	0	4.61691	5.78232	3.42916	12.6624	11.9649	7.05635	10.8386	0.618195	0.613776	1.43215	3.7799	0	0	1.58348	1.9623	41.3812	33.9733	22.9192	26.401	7.10522	0	4.25852	1.67718	5.57542	5.82815	9.70596	1.0212	0	1.67578	2.33247	1.88892	2.27798	3.37185	2.26648	0	49.6019	58.1792	19.1902	43.048	9.30949	3.37146	2.41439	6.86164	7.04574	5.1992
FBgn0001991	Ca-alpha1D	protein_coding	2L	26.6099	16.9287	24.5749	23.1468	16.3867	17.1497	18.8169	16.9353	73.5652	69.9704	37.2358	87.8827	217.96	237.416	248.607	282.571	10.679	14.56	21.7733	12.5058	15.9867	21.6893	23.4218	8.3859	25.0894	21.3699	18.5296	24.5087	67.0314	58.6524	58.3118	79.3348	176.544	208.38	193.784	218.522	28.1078	35.9653	43.178	29.5955	22.4979	28.6574	15.6935	41.1698	21.1372	20.2191
FBti0020086		transposable_element	3L	0	0	0	0	0	0	0	0	0	0	0	0	0	0	0	0	0	0	0	0	0	0	0	0	0	0	0	0	0	0	0	0	0	0	0	0	0	0	0	0	0	0	0	0	0	0
FBgn0051195	CG31195	protein_coding	3R	5.32199	6.15588	2.89116	6.00102	58.8431	53.842	39.986	42.6769	8.03654	7.36531	6.44466	3.7799	2.15802	6.08759	1.58348	7.84919	0.667438	0.808887	1.14596	1.38953	5.32891	8.93088	2.12926	5.03154	22.3017	14.5704	11.4707	8.16958	3.19197	5.02735	8.16366	2.83338	0.569496	2.69748	5.66619	6.50363	0	1.0578	3.19837	0	9.30949	5.6191	6.03597	6.86164	38.7516	15.0199
FBgn0000351	cort	protein_coding	2L	0	0	0	0	0	0	0	0	0	0	0	0	0	0	0	0	0	0	0	0	0	0	0	0	0	0	0	0	0	0	0	0	0	0	0	0	0	0	0	0	0	0	0	0	0	0
FBgn0028411	Nxt1	protein_coding	2R	1.0644	0	1.44558	0	1.4897	0	0.784039	0	0.618195	0	0.716073	0.944975	1.07901	0	1.58348	0	4.00463	0.808887	4.58384	1.38953	0	1.27584	0	0	0	1.94272	1.76472	3.06359	1.06399	0	3.49871	1.88892	0.569496	0.674369	0	1.30073	0	0	3.19837	2.6905	0.775791	0.56191	1.20719	1.37233	0	1.73307
FBgn0035875	Cpr66Cb	protein_coding	3L	0	0	0	0	0	0	0	0	6.80015	4.91021	4.29644	4.72487	1.07901	2.43504	3.16697	11.7738	0	0	0	0	2.66446	0	0	1.67718	0	0	0	0	11.7039	11.7305	5.83118	6.61123	0	9.44117	5.66619	0	0	0	0	0	0.775791	0	0	1.37233	0	0
FBgn0025644	CG14424	protein_coding	X	0	0	0	0	0	0	0	0	0	0	0	0	0	0	0	0	0	0	0	0	0	0	0	0	0	0	0	1.0212	0	0	0	0	0	0	0	0	0	0	0	0	0	0	0	0	0	0
FBgn0036454	CG17839	protein_coding	3L	2.12879	4.61691	20.2381	31.7197	1.4897	3.58947	1.56808	2.03223	0.618195	1.22755	0.716073	0.944975	0	0	0	1.9623	2.00231	0.808887	2.29192	0	1.7763	25.5168	4.25852	5.03154	0	0	0.88236	0	0	0	0	0	0.569496	0.674369	0	0	1.6534	0	1.59918	2.6905	0	3.93337	4.82878	0	0.704574	0
FBgn0035260	CG7991	protein_coding	3L	0	0	0	0	39.477	40.6806	36.8499	27.7738	0	0	0	0	0	0	0	0	0	0	1.14596	0	0.888152	0	0	0	11.1508	4.85679	18.5296	6.12718	0	1.67578	0	0	0	0	0	0	0	0	0	0	0.775791	0	1.20719	0	18.3189	11.5538
FBgn0028371	jbug	protein_coding	2R	67.057	175.442	109.864	162.028	29.794	38.2876	32.9297	27.0964	0	0.613776	2.14822	0.944975	6.47406	4.87007	9.5009	3.9246	28.6998	40.4444	45.8384	44.4649	170.525	91.8605	102.204	43.6067	12.5447	2.91408	2.64708	1.0212	0	0	0	0	3.98647	0	4.53295	0	52.9087	45.4856	111.943	48.429	68.2696	64.0578	57.9453	85.0843	10.5686	8.66534
FBgn0034441	CG10081	protein_coding	2R	0	0	0	0	0	0	0	0	0	0	0	0	0	2.43504	0	0	0	0	0	0	0	0	0	0	0	0	0	0	0	0	0	0	0	0	0	0	0	0	0	0	0	0	0	0	0	0
FBgn0261363	PPO3	protein_coding	2R	0	0	0	0	0	0	0	0	0	0.613776	0	0	0	0	0	0	0	0	0	0	0	0	2.12926	0	0	0	0	0	0	0	0	0	0	0	0	0	0	0	0	0	0	0	0	0	0	0
FBgn0033879	Echs1	protein_coding	2R	28.7387	13.8507	21.6837	13.7166	8.93819	14.3579	17.2489	10.8386	100.148	72.4255	73.7555	77.4879	78.7678	47.4832	85.5081	131.474	40.0463	34.7822	50.4223	63.9183	7.99337	40.8269	12.7755	51.9926	6.96928	9.71359	1.76472	6.12718	47.8796	31.8399	26.8234	48.1675	54.1021	51.2521	41.9298	46.8261	0	8.46244	0	29.5955	4.65475	2.80955	13.2791	4.11698	7.04574	8.08765
FBgn0000100	RpLP0	protein_coding	3L	790.847	655.601	553.657	510.944	167.591	197.022	205.418	161.224	777.071	866.651	814.891	658.648	1039.09	874.178	883.584	1061.6	427.828	486.141	501.931	493.283	778.909	993.88	802.73	1073.39	295.497	280.723	328.238	310.444	716.066	836.216	825.696	767.847	967.573	964.348	959.853	1104.32	717.575	663.243	641.273	621.506	1137.31	1348.02	1295.32	935.928	448.109	520.498
FBgn0028487	f-cup	protein_coding	3R	0	0	0	1.71458	0.74485	0.39883	0	0	0	0	0.716073	0	1.07901	1.21752	0	0	0	0	0	0	0	0	0	1.67718	0	0	0.88236	0	0	0	0	0	0	0.674369	0	0	0	0	0	0	0.775791	0	0	0	0	0
FBgn0263506	lncRNA:CR43495	ncRNA	X	0	0	0	0	0	0	0	0	0	0	0	0	0	0	0	0	0	0	0	0	0	0	0	0	0	0	0	0	0	0	0	0	0	0	0	0	0	0	0	0	0	0	0	0	0	0
FBgn0002719	Men	protein_coding	3R	257.584	10.7728	39.0307	24.0041	15.6418	16.7508	15.6808	12.8708	14.8367	5.52398	15.0375	1.88995	7.55307	2.43504	9.5009	5.8869	128.148	142.364	108.866	138.953	4.44076	63.792	14.9048	62.0556	23.6955	14.5704	29.1179	24.5087	13.8319	5.02735	33.8209	10.3891	10.2509	1.34874	5.66619	2.60145	71.0961	88.8556	84.7567	137.216	3.10316	7.30483	39.8374	4.11698	51.4339	45.6375
FBti0062909		transposable_element	4	0	0	0	0	0	0	0	0	0.618195	0	0.716073	0	0	0	0	0	0	0	0	0	0	0	0	0	0	0	0	0	0	0	0	0	0.569496	0	0	0	0	0	0	0	0	0	0	0	0.704574	0
FBti0062414		transposable_element	X	0	0	0	0	0	0	0	0	0	0	0	0	0	0	1.58348	0	0	0	1.14596	0	0	0	0	0	0	0.971359	3.52944	0	0	0	1.16624	0	0.569496	0	0	0	0	0	0	0	0	0	0	0	0	0
FBgn0030181	CG12645	protein_coding	X	0	0	0	0	0	0	0	0	0	0	0	0	0	0	0	0	0	0	0	0	0	0	0	0	0	0	0	0	0	0	0	0	0	0	0	0	0	0	0	0	0	0	0	0	0	0.577689
FBgn0036443	CG13471	protein_coding	3L	0	0	0	0	0	0	0	0	0	0	0	0	0	0	0	0	0	0	0	0	0	0	0	0	0	0	0	0	0	0	0	0	0	0	0	0	0	0	0	0	0	0	0	0	0	0
FBgn0000279	CecC	protein_coding	3R	0	0	0	0	7.4485	0	0.784039	0	0	0	0	0	0	0	0	0	1.33488	0	0	0	0	0	0	0	1.39386	0.971359	0	0	0	1.67578	0	0	0	0	0	0	0	0	0	0	0	0	0	0	2.11372	0
FBgn0027841	CstF64	protein_coding	3R	1.0644	1.53897	1.44558	0	3.72425	2.79181	0.784039	2.03223	2.47278	3.06888	2.14822	2.83492	3.23703	0	1.58348	0	1.33488	2.42666	1.14596	1.38953	0.888152	1.27584	0	0	0	0	0.88236	1.0212	4.25596	0	2.33247	3.77785	0	0	2.26648	1.30073	1.6534	2.11561	0	2.6905	1.55158	2.24764	0	0	2.11372	2.31076
FBgn0034642	CG15674	protein_coding	2R	0	1.53897	0	0	0	0	0	0	0	0.613776	0	0	1.07901	0	0	0	0.667438	0	1.14596	1.38953	0	0	0	0	0	0	0	0	0	0	0	0	0	0	0	0	0	1.0578	0	0	0	0	0	0	0	0
FBgn0261479	nero	protein_coding	3R	2.12879	0	1.44558	0.857289	0.74485	2.79181	2.35212	2.70964	15.4549	6.75153	12.1732	6.61482	1.07901	4.87007	3.16697	1.9623	9.34413	8.89776	11.4596	6.94764	1.7763	0	4.25852	1.67718	9.75699	4.85679	7.05888	5.10599	8.51192	20.1094	16.3273	17.0003	6.26445	4.72059	2.26648	2.60145	3.3068	6.34683	6.39673	5.381	3.87895	6.18101	7.24316	2.74466	5.63659	5.1992
FBgn0025709	CNT2	protein_coding	2R	2.12879	0	1.44558	0.857289	0	0	0	0	0	0	0	0	0	0	1.58348	0	0	0	2.29192	0	1.7763	5.10336	2.12926	0	0	0	0	0	0	0	0	0	0	0	0	1.30073	0	0	0	0	0	0.56191	0	0	0	0
FBgn0039696	Rnb	protein_coding	3R	0	0	1.44558	0.857289	5.21395	1.99415	4.70424	2.70964	1.23639	1.84133	2.86429	2.83492	0	1.21752	3.16697	0	2.66975	4.85332	2.29192	0	2.66446	1.27584	2.12926	5.03154	6.96928	4.85679	2.64708	3.06359	1.06399	0	1.16624	0	1.13899	0.674369	1.13324	0	1.6534	2.11561	1.59918	0	0.775791	1.12382	0	0	0.704574	4.04383
FBgn0011300	babo	protein_coding	2R	11.7084	12.3118	7.2279	13.7166	11.9176	40.6806	34.4977	33.1931	14.8367	17.1857	14.3215	8.50477	12.9481	9.74015	12.6679	13.7361	18.0208	5.66221	5.72981	4.16859	11.546	14.0342	8.51703	18.449	19.514	36.9116	28.2355	18.3816	8.51192	13.4063	18.6598	11.3335	6.26445	8.09243	11.3324	9.10508	8.26699	5.28902	6.39673	0	12.4127	5.6191	2.41439	15.0956	16.9098	21.9522
FBti0060558		transposable_element	2L	0	0	0	0	0	0	0	0	0	0	0.716073	0	0	0	0	0	0	0	0	0	0	0	0	0	0	0	0	0	0	0	0	0	0	0	0	0	0	0	0	0	0	0	0	0	0	0
FBgn0039827	CG1544	protein_coding	3R	1.0644	0	4.33674	1.71458	1.4897	3.9883	3.13616	4.06446	0.618195	0.613776	0.716073	0.944975	48.5555	4.87007	9.5009	37.2837	11.3464	17.7955	25.2111	18.0639	0	0	0	0	11.1508	5.82815	10.5883	3.06359	1.06399	5.02735	1.16624	1.88892	26.7663	29.6723	16.9986	24.7138	0	11.6358	0	21.524	3.87895	0.56191	2.41439	2.74466	4.93202	10.9761
FBgn0053928	CG33928	protein_coding	2L	0	0	0	0	0	0	0	0	0	0	0	0	0	0	0	0	0	0	0	0	0	0	0	0	0	0	0	0	0	0	0	0	0	0	0	0	0	0	0	0	0	0	0	0	0	0
FBgn0032486	mRF1	protein_coding	2L	2.12879	1.53897	2.89116	0	0.74485	1.19649	1.56808	2.03223	3.09098	2.4551	2.86429	3.7799	6.47406	2.43504	6.33393	11.7738	1.33488	0	0	0	2.66446	1.27584	0	5.03154	1.39386	5.82815	2.64708	1.0212	3.19197	3.35157	15.1611	4.72231	3.98647	5.39495	5.66619	6.50363	0	0	0	2.6905	0	5.05719	8.45036	5.48931	3.52287	2.88845
FBgn0038331	Ccm3	protein_coding	3R	5.32199	9.23381	1.44558	8.57289	4.4691	5.58361	6.27232	6.77411	1.85459	3.68265	7.8768	2.83492	6.47406	1.21752	1.58348	3.9246	16.0185	9.70665	9.16769	8.33717	4.44076	5.10336	6.38777	6.70872	0	2.91408	0.88236	5.10599	1.06399	3.35157	4.66495	5.66677	2.27798	10.1155	3.39972	6.50363	3.3068	11.6358	12.7935	18.8335	6.20633	4.49528	12.0719	6.86164	2.11372	6.35458
FBgn0031611	FIG4	protein_coding	2L	1.0644	1.53897	0	0	4.4691	3.19064	0.784039	3.38705	0	0	0	0	1.07901	0	1.58348	0	3.33719	0	2.29192	6.94764	0.888152	1.27584	0	1.67718	1.39386	2.91408	2.64708	3.06359	1.06399	0	1.16624	0	1.13899	0	0	1.30073	8.26699	2.11561	4.79755	5.381	0.775791	1.12382	4.82878	0	0.704574	0
FBgn0266169	lncRNA:CR44875	ncRNA	2L	0	0	0	0	0	0	0	0	0	0	0	0	0	0	0	0	1.33488	0	0	0	0	0	0	0	0	0	0	0	0	0	0	0	0	0	0	0	0	0	0	0	0	0	0	0	0	0
FBgn0001256	ImpL1	protein_coding	3L	0	0	0	0	2.23455	0.39883	0.784039	0	0.618195	0	0	0	0	0	0	0	0	0	0	0	0	0	0	0	0	0	0	0	0	0	0	0	0	0	0	0	0	0	0	0	0	0	0	0	0	0
FBgn0035267	CG13921	protein_coding	3L	0	1.53897	0	0.857289	2.9794	3.58947	6.27232	3.38705	0	0	0	0	0	0	0	0	2.00231	0.808887	0	0	1.7763	2.55168	0	0	1.39386	2.91408	0	0	0	0	0	0	0	0	0	0	0	0	1.59918	0	0.775791	0	1.20719	0	3.52287	1.15538
RR50423_transposable_element		transposable_element	3L	1.0644	4.61691	0	2.57187	0.74485	1.19649	0	1.35482	0.618195	1.22755	0	0	1.07901	0	4.75045	0	2.00231	1.61777	6.87577	9.7267	0	0	0	1.67718	4.18157	2.91408	0.88236	1.0212	1.06399	0	0	0	0.569496	0.674369	1.13324	0	4.96019	2.11561	1.59918	5.381	0.775791	0	2.41439	1.37233	8.45489	0.577689
FBgn0035264	Oseg4	protein_coding	3L	0	0	0	0	0	0	0	0	0	0	0	0	0	0	0	0	0	0	0	0	0	0	0	0	0	0	0	0	0	0	0	0	0	0	0	0	0	0	0	0	0.775791	0	0	1.37233	0	0
FBgn0032479	CG16974	protein_coding	2L	53.2199	9.23381	11.5646	10.2875	18.6212	37.8888	34.4977	23.7094	29.0552	23.9373	33.6554	30.2392	46.3974	51.1358	38.0036	33.3591	8.67669	8.89776	14.8975	8.33717	24.8683	48.4819	19.1633	36.8979	65.5112	55.3675	54.7063	53.1023	101.079	77.086	102.629	107.669	137.248	133.525	114.457	105.359	44.6417	35.9653	36.7812	32.286	33.359	30.3432	38.6302	16.4679	78.9123	60.0797
FBgn0030330	Tango10	protein_coding	X	6.38638	6.15588	5.78232	6.85831	9.68304	14.3579	10.1925	15.5804	11.1275	12.8893	16.4697	10.3947	10.7901	6.08759	3.16697	11.7738	2.66975	4.04444	4.58384	5.55812	8.88152	7.65504	4.25852	10.0631	15.3324	12.6277	10.5883	16.3392	11.7039	16.7578	11.6624	13.2225	4.55596	14.8361	4.53295	5.2029	3.3068	3.17341	7.99592	8.07151	6.20633	19.6669	24.1439	6.86164	14.0915	15.5976
FBgn0051202	alpha-Man-Ic	protein_coding	3R	0	0	0	0	0	0	0	0	0	0	0	0	0	0	0	0	0	0	0	0	0	0	0	0	0	0	0	0	0	0	0	0	0	0	0	0	0	0	0	0	0	0.56191	0	1.37233	0	0
FBgn0033645	CG13196	protein_coding	2R	0	0	0	0	0	0	0	0	0	0	0	0	0	0	0	0	0	0	0	0	0	0	0	0	0	0	0	0	0	0	0	0	0	0	0	0	0	0	0	0	0	0.56191	0	0	0	0
FBgn0267118	lncRNA:CR45558	ncRNA	3R	0	0	0	0	0	0	0	0	0	0	0	0	0	0	0	0	0	0	0	0	0	0	0	0	0	0	0	0	0	0	0	0	0	0	0	0	0	0	0	0	0	0	0	0	0	0
FBgn0030157	CG1468	protein_coding	X	0	0	0	0	0	0.39883	0	0	0	0	0.716073	1.88995	6.47406	7.30511	0	7.84919	31.3696	50.9599	36.6708	59.7497	0.888152	0	0	0	0	0	0	0	0	1.67578	1.16624	0	3.98647	9.44117	4.53295	3.90218	0	19.0405	0	45.7385	0	0	0	0	1.40915	0
FBgn0037042	CG12984	protein_coding	3L	0	0	0	0	0	0	0	0	0	0	0	0	0	0	0	0	0	0	0	0	0	0	0	0	0	0	0	0	0	0	0	0	0	0	0	0	0	0	0	0	0	0	0	0	0	0
FBgn0034850	CG9875	protein_coding	2R	0	0	0	0	0	0	0	0	0.618195	0	0	1.88995	0	0	0	0	0	0	0	0	0	0	0	0	0	0	0	0	0	0	0	0	0.569496	0	0	0	0	0	0	0	0	0	0	0	0	0
FBgn0031530	Pgant2	protein_coding	2L	3.19319	0	0	0	0	0.39883	0	0	0	0	0	0	1.07901	2.43504	1.58348	0	0	0	0	0	0.888152	5.10336	0	0	0	0	0.88236	0	0	0	3.49871	0	1.70849	0.674369	0	1.30073	0	0	0	0	1.55158	1.12382	1.20719	0	1.40915	0
FBgn0053296	CG33296	protein_coding	2L	0	0	0	0	0	0	0	0	0	0	0	0	0	0	0	0	0	0.808887	0	0	0	0	0	0	0	0	0	0	0	0	0	0	0	0	0	0	0	0	0	0	0	0	0	0	0	0
FBgn0265666	lncRNA:CR44473	ncRNA	2R	0	0	0	0	0	0	0	0	0	0	0	0	0	0	0	0	0	0	0	0	0	0	0	0	0	0	0	0	0	0	0	0	0	0	0	0	0	0	0	0	0	0	0	0	0	0
FBgn0039261	Ythdf	protein_coding	3R	18.0948	43.0911	21.6837	24.8614	38.7322	25.9239	35.2818	29.1287	23.4914	25.7786	20.7661	19.8445	10.7901	10.9577	6.33393	13.7361	13.3488	9.70665	8.02173	12.5058	27.5327	21.6893	17.0341	11.7403	30.6648	22.3413	28.2355	36.7631	25.5358	21.7852	16.3273	24.556	12.5289	4.72059	4.53295	5.2029	9.92039	12.6937	22.3886	13.4525	58.9601	16.2954	10.8647	31.5635	21.1372	25.996
FBgn0037630	Ir85a	protein_coding	3R	0	0	0	0	0	0	0	0	0	0	0	0	0	0	0	0	0	0	0	0	0	0	0	0	0	0	0	0	0	0	0	0	0	0.674369	0	0	0	0	0	0	0	0	0	0	0	0
FBgn0041234	Gr59f	protein_coding	2R	0	0	0	0	0	0	0	0	0	0	0	0	0	0	0	1.9623	0	0	0	0	0	0	0	0	0	0	0	0	0	0	0	0	0	0	0	0	0	0	0	0	0	0	0	0	0	0
FBgn0267337	rn	protein_coding	3R	0	0	0	0	0	0	0	0	0	0.613776	0	0	0	0	0	0	0	0	0	0	0	0	0	0	0	0	0	0	0	0	0	0	0	0	0	0	0	0	0	0	0	0	0	0	0	0
FBgn0037746	CG8478	protein_coding	3R	0	0	0	0	0	1.59532	0	0	0	0	0	0	0	0	0	0	0	0	0	0	0	0	0	0	0	0	0.88236	1.0212	0	0	0	0.944461	0	0	0	0	0	0	0	0	0	0	0	1.37233	0	0.577689
FBgn0016687	Nurf-38	protein_coding	2R	38.3183	13.8507	18.7925	16.2885	22.3455	17.1497	20.385	20.9997	54.4012	59.5362	51.5572	41.5789	73.3727	56.0058	87.0916	109.889	54.0625	56.6221	49.2763	65.3079	7.10522	19.1376	2.12926	18.449	12.5447	10.6849	15.0001	14.2968	44.6876	40.2188	59.4781	49.112	58.0885	56.647	62.3281	44.2247	8.26699	14.8093	6.39673	59.191	11.6369	8.99057	18.1079	4.11698	11.9778	10.9761
FBgn0038854	CG7044	protein_coding	3R	2.12879	4.61691	2.89116	3.42916	2.9794	1.99415	2.35212	2.70964	1.23639	1.84133	2.14822	3.7799	10.7901	3.65256	4.75045	0	2.00231	2.42666	1.14596	1.38953	1.7763	2.55168	2.12926	3.35436	4.18157	2.91408	2.64708	1.0212	3.19197	8.37891	4.66495	4.72231	2.84748	4.04622	3.39972	1.30073	1.6534	2.11561	0	2.6905	3.87895	8.42866	13.2791	5.48931	4.93202	8.08765
FBgn0010303	hep	protein_coding	X	13.8372	32.3183	36.1395	35.1489	47.6704	42.2759	53.3147	60.2895	27.2006	30.6888	20.05	19.8445	26.9753	24.3504	30.0862	23.5476	28.0324	41.2533	24.0652	37.5173	37.3024	19.1376	12.7755	25.1577	41.8157	34.9689	31.765	34.7207	18.0878	21.7852	19.826	14.1669	19.3628	23.6029	32.8639	23.4131	34.7214	35.9653	30.3845	10.762	24.8253	20.2288	15.6935	31.5635	28.183	27.1514
FBgn0033631	Sod3	protein_coding	2R	12.7728	56.9418	28.9116	55.7238	67.0365	56.235	44.6902	56.9025	0	0.613776	2.14822	1.88995	3.23703	1.21752	6.33393	11.7738	71.4159	105.964	80.2173	77.8136	35.5261	44.6544	44.7144	16.7718	20.9078	16.5131	19.4119	11.2332	0	0	2.33247	3.77785	2.27798	4.72059	4.53295	1.30073	49.6019	102.607	105.546	121.073	15.5158	17.9811	14.4863	20.5849	27.4784	15.5976
FBgn0267200	lncRNA:CR45640	ncRNA	3R	0	0	0	0	0	0	0	0	0	0	0	0	0	0	0	0	0	0	0	0	0	0	0	0	1.39386	0	0	0	0	0	0	0	0	0	0	0	0	0	0	0	0	0	0	0	0	0
FBgn0035124	ttm2	protein_coding	3L	0	0	0	0	0	0	0	0	0	0	0	0	0	0	0	0	0	0	0	0	0	0	0	0	0	0	0	0	0	0	0	0	0	0	1.13324	0	0	0	0	0	0	0	0	0	0	0.577689
FBgn0037656	CG11986	protein_coding	3R	0	0	0	0	0	0.39883	0	0.677411	0	0.613776	0	0	0	0	0	0	0.667438	0	0	0	0	0	0	0	0	1.94272	0.88236	0	0	0	0	0.944461	0	0	1.13324	0	0	0	0	0	0	0	0	0	0	0.577689
FBti0063367		transposable_element	3R	0	0	0	0	0	0	0	0	0	0	0	0	0	0	0	0	0	0	0	0	0	0	0	0	0	0	0	0	0	0	0	0	1.70849	0	0	0	0	1.0578	0	0	0	0	0	0	0	0
FBti0018967		transposable_element	2R	1.0644	0	0	0	0.74485	1.19649	1.56808	0.677411	0.618195	0.613776	1.43215	2.83492	4.31604	1.21752	4.75045	1.9623	1.33488	2.42666	1.14596	1.38953	0.888152	0	0	1.67718	1.39386	0	0.88236	1.0212	1.06399	3.35157	1.16624	0.944461	1.13899	1.34874	4.53295	1.30073	0	2.11561	0	0	3.10316	1.68573	3.62158	2.74466	1.40915	2.88845
FBgn0004592	Eig71Ee	protein_coding	3L	34.0607	4.61691	0	0	0	0	0	0	0	0	0	0	0	0	0	0	0	0	0	0	0	0	0	0	0	0	0	0	0	0	0	0	0	0	0	0	0	0	0	0	0	0.56191	2.41439	0	0	0
FBti0019792		transposable_element	2L	0	0	0	0	0	0	0	0	0	0	0	0	0	0	0	0	0	0	0	0	0	0	0	0	0	0	0	0	0	0	0	0	0	0	0	0	0	0	0	0	0.775791	0	0	0	0	0
FBgn0010638	Sec61beta	protein_coding	2R	15.966	29.2404	14.4558	20.5749	29.0491	26.7216	36.8499	29.8061	45.1283	42.3505	52.2733	45.3588	67.9776	42.6131	45.921	129.512	17.3534	25.8844	22.9192	29.1801	29.309	34.4477	42.5852	20.1262	44.6034	58.2815	35.2944	28.5935	81.9273	55.3008	81.6366	77.4458	44.9901	55.2983	52.129	58.5326	3.3068	16.9249	11.1943	26.905	27.9285	23.6002	42.2518	20.5849	42.2744	29.4622
FBgn0050049	CG30049	protein_coding	2R	0	0	0	0	0	0	0	0	0	0	0	0	0	0	0	0	0	0	0	0	0	0	0	0	1.39386	0	0	0	0	0	0	0	0	0	0	0	0	0	0	0	0	0	0	0	0	0
FBgn0039510	CG3339	protein_coding	3R	0	0	0	0	0	0	0	0	0	0	0	0	0	0	0	0	0	0	0	0	0	0	0	0	0	0	0	0	0	0	0	0	0	0	0	0	0	0	0	0	0	0	0	0	0	0
FBgn0264488	CG43896	protein_coding	3L	0	0	0	0	0	0	0	0	0	0	0	0	0	0	0	0	0	0	0	0	0	0	0	0	0	0	0	0	0	0	0	0	0	0	0	0	0	0	0	0	0	0	0	0	0	0
FBgn0030958	CR6900	pseudogene	X	0	9.23381	1.44558	2.57187	2.9794	4.78595	3.9202	2.03223	3.09098	3.06888	5.01251	1.88995	2.15802	1.21752	1.58348	1.9623	4.00463	1.61777	1.14596	1.38953	6.21706	1.27584	6.38777	0	9.75699	16.5131	20.2943	17.3604	4.25596	1.67578	6.99742	4.72231	6.83395	4.04622	5.66619	3.90218	4.96019	5.28902	6.39673	5.381	7.75791	2.80955	3.62158	2.74466	11.2732	9.82072
FBgn0037700	CG8149	protein_coding	3R	12.7728	3.07794	2.89116	6.85831	16.3867	21.138	28.2254	12.8708	17.9277	20.8684	24.3465	36.854	20.5012	18.2628	19.0018	19.623	5.3395	7.27999	8.02173	4.16859	7.10522	5.10336	8.51703	5.03154	11.1508	22.3413	22.059	17.3604	19.1518	18.4336	24.491	19.8337	9.11193	11.4643	5.66619	13.0073	4.96019	5.28902	9.5951	2.6905	12.4127	8.42866	6.03597	5.48931	16.9098	18.4861
FBgn0040028	CG17450	protein_coding	X	0	1.53897	0	0	0	0	0	0	0	0	0	0	0	0	0	0	0	0	0	0	0	0	0	0	0	0	0	0	0	0	0	0	0	0	0	0	0	0	0	0	0	0	0	0	0	0
FBgn0260857	Bet1	protein_coding	3L	5.32199	1.53897	0	6.85831	1.4897	4.78595	7.84039	3.38705	3.70917	4.91021	7.16073	7.5598	3.23703	7.30511	4.75045	11.7738	8.00926	10.5155	10.3137	11.1162	5.32891	2.55168	8.51703	1.67718	6.96928	4.85679	3.52944	0	2.12798	1.67578	1.16624	6.61123	5.69496	3.37185	4.53295	3.90218	4.96019	3.17341	4.79755	2.6905	5.43054	7.86674	1.20719	5.48931	2.8183	2.31076
FBti0019530		transposable_element	X	0	0	0	0	0	0	0	0	0	0	0	0	0	0	0	0	0.667438	0	2.29192	0	0	0	0	0	0	0	0	0	0	0	0	0	0	0	0	0	0	0	0	0	0	0	0	0	0	0
FBgn0024187	syd	protein_coding	3L	14.9016	23.0845	24.5749	23.1468	7.4485	1.99415	5.48828	3.38705	5.56376	10.4342	8.59287	5.66985	10.7901	6.08759	3.16697	5.8869	8.67669	12.1333	8.02173	9.7267	24.8683	12.7584	23.4218	13.4174	4.18157	4.85679	6.17652	6.12718	10.6399	11.7305	3.49871	1.88892	9.11193	9.44117	11.3324	2.60145	13.2272	12.6937	14.3927	5.381	7.75791	15.7335	15.6935	17.8403	2.11372	5.1992
FBgn0036678	CG11905	protein_coding	3L	0	0	0	0	179.509	158.335	137.207	154.45	0	3.06888	0.716073	0	1.07901	3.65256	12.6679	7.84919	0	0	1.14596	0	0.888152	3.82752	4.25852	0	57.1481	67.0238	90.0007	20.4239	0	0	0	0	1.13899	14.8361	1.13324	1.30073	0	0	0	0	4.65475	0.56191	0	4.11698	87.3672	42.749
FBgn0037012	Rcd2	protein_coding	3L	17.0304	1.53897	24.5749	42.0072	8.93819	9.97074	14.1127	10.1612	0	0.613776	0	0.944975	3.23703	0	0	0	6.67438	2.42666	2.29192	5.55812	3.55261	34.4477	4.25852	40.2523	12.5447	3.88544	9.70596	8.16958	1.06399	0	0	0.944461	1.70849	2.02311	1.13324	0	4.96019	3.17341	1.59918	0	6.20633	37.0861	18.1079	6.86164	10.5686	4.62152
FBgn0025335	Cpes	protein_coding	2R	9.57958	16.9287	20.2381	18.8604	1.4897	3.19064	3.9202	7.45152	1.23639	3.68265	1.43215	2.83492	3.23703	1.21752	4.75045	0	28.6998	35.591	25.2111	38.9068	38.1905	10.2067	19.1633	23.4805	5.57542	3.88544	2.64708	3.06359	6.38394	1.67578	8.16366	5.66677	9.11193	12.813	5.66619	7.80435	19.8408	27.5029	15.9918	26.905	39.5653	30.3432	19.3151	42.5422	10.5686	2.88845
FBgn0050101	Vajk4	protein_coding	2R	0	0	0	0	0	0	0	0.677411	10.5093	8.59286	16.4697	23.6244	16.1852	18.2628	41.1706	49.0575	0.667438	0.808887	0	2.77906	0	0	0	0	0	0	0	0	10.6399	10.0547	27.9897	15.1114	6.26445	22.9286	7.93267	2.60145	0	0	0	0	0	0	0	1.37233	0	0
FBgn0030699	CG8578	protein_coding	X	2.12879	4.61691	7.2279	3.42916	2.23455	2.39298	0	3.38705	4.94556	1.84133	4.29644	0	6.47406	3.65256	4.75045	7.84919	8.67669	4.04444	4.58384	2.77906	0	3.82752	2.12926	0	4.18157	3.88544	0.88236	0	1.06399	11.7305	5.83118	2.83338	4.55596	3.37185	3.39972	3.90218	1.6534	2.11561	4.79755	13.4525	5.43054	1.68573	2.41439	0	4.22744	4.62152
FBgn0030882	Gss1	protein_coding	X	0	0	0	0	0	1.59532	3.13616	0	0	1.22755	0	0	0	0	0	1.9623	0.667438	0.808887	0	1.38953	0	0	0	0	0	0	0.88236	0	0	0	0	1.88892	0	0	0	1.30073	0	0	0	0	0	0	1.20719	1.37233	0.704574	0.577689
FBgn0032857	CG10947	protein_coding	2L	0	3.07794	0	0	0	0	0	0	21.0186	7.36531	12.8893	17.0095	4.31604	4.87007	9.5009	1.9623	0.667438	0.808887	19.4813	4.16859	6.21706	0	0	1.67718	0	0	0	0	6.38394	1.67578	0	3.77785	3.41697	5.39495	5.66619	2.60145	13.2272	4.23122	27.1861	16.143	1.55158	0	0	8.23397	0	0
FBgn0003435	sm	protein_coding	2R	0	13.8507	1.44558	4.28645	5.9588	4.38712	2.35212	0.677411	1.85459	2.4551	4.29644	0.944975	2.15802	2.43504	0	1.9623	3.33719	7.27999	4.58384	0	5.32891	0	2.12926	0	1.39386	4.85679	4.4118	3.06359	0	5.02735	3.49871	0.944461	1.13899	0	2.26648	1.30073	0	1.0578	3.19837	2.6905	10.8611	8.42866	2.41439	19.2126	4.22744	1.73307
FBgn0038839	Ktl	protein_coding	3R	0	0	0	0	0	0	0	0	0	0	0	0	0	0	0	0	6.00694	0.808887	2.29192	0	0	0	0	0	0	0	0	0	1.06399	0	0	0	0	0	0	0	3.3068	1.0578	6.39673	5.381	0	0	0	1.37233	0	1.15538
FBgn0031710	Vps52	protein_coding	2L	3.19319	3.07794	1.44558	0	1.4897	3.58947	2.35212	1.35482	1.85459	1.84133	1.43215	2.83492	0	3.65256	1.58348	0	2.66975	4.85332	1.14596	9.7267	5.32891	0	2.12926	1.67718	5.57542	5.82815	11.4707	5.10599	2.12798	1.67578	1.16624	0.944461	4.55596	1.34874	2.26648	6.50363	3.3068	2.11561	0	0	4.65475	5.6191	4.82878	0	1.40915	4.04383
FBgn0030769	CG13012	protein_coding	X	8.51518	18.4676	21.6837	7.7156	0.74485	1.19649	1.56808	3.38705	4.94556	1.84133	0.716073	1.88995	1.07901	0	1.58348	1.9623	2.00231	4.85332	16.0435	2.77906	8.88152	11.4826	8.51703	11.7403	5.57542	4.85679	7.05888	7.14838	11.7039	13.4063	10.4961	8.50015	5.69496	6.74369	4.53295	5.2029	13.2272	22.2139	25.5869	5.381	6.98212	5.05719	7.24316	9.6063	2.11372	5.1992
FBgn0031043	Naa20A	protein_coding	X	6.38638	7.69484	4.33674	11.1448	6.70365	7.17893	10.9766	6.77411	46.9828	46.647	47.2608	40.6339	58.2666	66.9635	47.5045	49.0575	4.67207	4.04444	1.14596	4.16859	4.44076	8.93088	2.12926	0	5.57542	6.79951	6.17652	4.08479	11.7039	25.1367	26.8234	18.8892	25.0578	33.7185	35.1304	41.6232	0	0	1.59918	0	1.55158	6.18101	3.62158	6.86164	7.04574	5.1992
FBgn0036290	CG10638	protein_coding	3L	11.7084	3.07794	5.78232	6.00102	5.9588	3.9883	3.9202	4.74187	22.8732	15.3444	17.9018	7.5598	15.1061	14.6102	23.7523	7.84919	1.33488	0.808887	1.14596	5.55812	2.66446	6.3792	4.25852	8.3859	9.75699	10.6849	9.70596	5.10599	23.4078	18.4336	26.8234	19.8337	22.2103	24.2773	23.798	31.2174	0	2.11561	1.59918	8.07151	1.55158	4.49528	7.24316	4.11698	7.75031	4.62152
FBgn0033528	trsn	protein_coding	2R	0	3.07794	8.67348	2.57187	1.4897	7.97659	6.27232	8.12893	6.80015	3.06888	2.86429	9.44975	0	1.21752	0	1.9623	3.33719	1.61777	0	0	2.66446	1.27584	6.38777	5.03154	6.96928	8.74223	6.17652	8.16958	4.25596	3.35157	9.32989	2.83338	0.569496	1.34874	0	3.90218	1.6534	0	1.59918	0	2.32737	2.24764	4.82878	0	10.5686	4.62152
FBti0019040		transposable_element	2R	0	0	0	0	0	0	0	0	0	0	0	0	0	0	0	0	0	0	0	0	0	1.27584	0	0	0	0	0	0	0	0	0	0	0	0	0	0	0	0	0	0	0	0	0	0	0	0
FBgn0031070	CG12702	protein_coding	X	0	0	0	0	0	0	0	0	0.618195	0	0	0	0	0	0	0	0	0	0	0	0	0	0	0	0	0	0	0	0	0	0	0	0	0	1.13324	0	0	0	0	0	0	0	0	0	0.704574	0
FBgn0000250	cact	protein_coding	2L	120.277	113.884	72.279	88.3008	32.0285	28.3169	29.0095	32.5157	71.0925	112.321	110.275	60.4784	111.138	148.537	115.594	109.889	176.871	228.915	231.484	225.104	151.874	122.481	78.7825	147.592	37.6341	20.3985	15.8825	35.7419	121.295	120.656	110.792	97.2795	115.038	111.271	120.123	104.058	266.197	227.428	446.172	309.408	271.527	83.1627	63.9813	257.998	24.6601	20.2191
FBgn0030757	CG9902	protein_coding	X	0	0	0	0	0	0	0.784039	0.677411	0	0.613776	0	0	0	1.21752	0	0	0.667438	0	0	1.38953	0	0	0	0	0	0	0	0	0	0	1.16624	0	0	0	0	0	0	3.17341	0	0	0	0	1.20719	0	0	0
FBgn0011762	DNApol-alpha50	protein_coding	3L	0	0	0	1.71458	0	0	1.56808	0.677411	0	0	0	0	1.07901	0	0	0	0.667438	0.808887	1.14596	0	0	1.27584	0	0	0	0.971359	1.76472	1.0212	0	0	0	0.944461	1.13899	0	0	0	0	1.0578	3.19837	5.381	0.775791	2.24764	0	0	0	1.73307
FBgn0030706	Lrp4	protein_coding	X	0	0	0	0	0	0	0	0	0	0.613776	0	0	0	0	0	0	0	0	0	0	0	0	0	0	0	0	0	0	0	0	0	0	0	0	1.13324	0	0	0	0	0	0	0	0	0	0	0
FBgn0036723	CG12229	protein_coding	3L	0	0	0	0	0	0	0	0	0	0	0	0	0	0	0	0	0	0	0	0	0	0	0	0	0	0	0	0	0	0	0	0	0	0	0	0	0	0	0	0	0	0	0	0	0	0
FBgn0025815	Mcm6	protein_coding	X	3.19319	0	0	0.857289	3.72425	2.79181	2.35212	6.0967	2.47278	3.06888	5.72858	4.72487	0	0	0	3.9246	1.33488	2.42666	2.29192	2.77906	0	0	0	0	4.18157	2.91408	0.88236	5.10599	2.12798	5.02735	6.99742	3.77785	2.27798	2.69748	0	1.30073	1.6534	0	0	0	0.775791	0	2.41439	0	7.04574	1.15538
FBgn0029724	CG15472	protein_coding	X	0	0	0	0.857289	0	0	0	0	0	0	0	0	0	0	0	0	0	0	0	0	0	0	0	0	0	0	0	0	0	0	0	0	0	0	0	0	0	0	0	0	0	0	0	0	0	0
FBgn0031805	Nepl4	protein_coding	2L	0	0	0	0	0	0	0	0	0	0	0	0.944975	0	0	1.58348	0	0.667438	0	0	1.38953	0	1.27584	0	0	0	0	0	0	0	0	0	0	0	0	0	0	0	0	0	2.6905	0	0	0	0	0	0
FBgn0002723	Met	protein_coding	X	11.7084	7.69484	7.2279	3.42916	3.72425	10.3696	6.27232	15.5804	4.32737	5.52398	4.29644	9.44975	1.07901	10.9577	1.58348	15.6984	17.3534	26.6933	18.3354	18.0639	6.21706	11.4826	4.25852	3.35436	12.5447	7.77087	13.2354	5.10599	1.06399	5.02735	1.16624	8.50015	11.9594	6.06932	5.66619	1.30073	33.068	20.0983	17.591	10.762	12.4127	6.74292	4.82878	6.86164	4.93202	13.2869
FBgn0263023	CG43318	protein_coding	3R	0	0	0	0	0	0	0	0	0	0	0	0	0	0	0	0	0	0	0	0	0	0	0	0	0	0	0	0	0	0	0	0	0	0	0	0	0	0	0	0	0	0	0	0	0	0
FBgn0086784	stmA	protein_coding	2R	11.7084	7.69484	4.33674	4.28645	5.9588	3.58947	2.35212	2.03223	3.09098	1.84133	1.43215	2.83492	5.39505	4.87007	7.91742	11.7738	5.3395	14.56	8.02173	8.33717	5.32891	7.65504	4.25852	15.0946	4.18157	2.91408	7.94124	6.12718	6.38394	0	6.99742	2.83338	6.83395	5.39495	7.93267	10.4058	13.2272	6.34683	7.99592	8.07151	7.75791	11.2382	10.8647	4.11698	2.11372	6.93227
FBgn0034919	CG5569	protein_coding	2R	1.0644	0	1.44558	0	1.4897	0.797659	1.56808	1.35482	3.09098	3.06888	1.43215	2.83492	6.47406	14.6102	11.0844	9.81149	0	2.42666	3.43788	1.38953	0.888152	0	0	5.03154	6.96928	2.91408	3.52944	2.04239	8.51192	8.37891	5.83118	4.72231	9.11193	4.72059	9.06591	13.0073	1.6534	1.0578	1.59918	2.6905	0	1.68573	0	0	4.93202	2.31076
FBti0019077		transposable_element	X	0	0	0	0	0	0	0	0	0	0	0	0	0	0	0	0	0	0	0	0	0	0	0	0	0	0	0	0	0	0	0	0	0	0	0	0	0	0	0	0	0.775791	0.56191	0	0	0	0
FBti0059944		transposable_element	3L	0	0	0	0	0	0	0	0	0	0	0	0	0	0	0	0	0	0	0	0	0	0	0	0	0	0	0	0	0	0	0	0	0	0	0	0	0	0	0	0	0	0	0	0	0	0
FBgn0035483	Mul1	protein_coding	3L	0	0	2.89116	1.71458	0.74485	0.39883	0	1.35482	0	0	1.43215	0.944975	0	1.21752	1.58348	1.9623	0	0.808887	1.14596	0	0	1.27584	0	0	0	0	0	0	0	0	0	0	1.13899	0.674369	1.13324	1.30073	0	0	0	0	0	0.56191	1.20719	0	1.40915	1.15538
FBgn0027106	Inx7	protein_coding	X	0	0	0	0	0	0	0	0	0	0	0	0	0	0	0	0	0	0.808887	0	0	0	0	0	0	0	0	0	0	0	0	0	0	0	0	0	0	0	0	0	0	0	0	0	0	0	0
FBgn0001075	ft	protein_coding	2L	1.0644	0	0	0.857289	43.2013	37.8888	18.8169	31.8383	0.618195	0.613776	0	0	0	0	0	0	4.00463	0.808887	2.29192	5.55812	0.888152	3.82752	0	0	18.1201	12.6277	10.5883	2.04239	0	0	0	0	0	0	0	0	0	2.11561	1.59918	2.6905	3.10316	0.56191	2.41439	0	15.5006	8.08765
FBgn0036369	CG10089	protein_coding	3L	0	0	0	0	1.4897	0	0	0	0	0	0	0.944975	0	1.21752	0	0	3.33719	6.4711	5.72981	2.77906	0.888152	0	0	0	0	0	0	0	0	0	0	0	1.70849	0.674369	0	2.60145	0	3.17341	4.79755	0	0	0.56191	0	0	0	0
FBgn0037466	CG1965	protein_coding	3R	3.19319	1.53897	1.44558	4.28645	2.9794	4.38712	7.05635	4.74187	4.32737	6.75153	2.86429	4.72487	2.15802	1.21752	0	7.84919	4.00463	4.04444	8.02173	2.77906	8.88152	5.10336	6.38777	3.35436	9.75699	0.971359	7.94124	8.16958	6.38394	10.0547	4.66495	2.83338	8.54243	8.7668	2.26648	5.2029	1.6534	9.52024	0	5.381	5.43054	7.86674	4.82878	5.48931	7.04574	4.04383
FBgn0026323	Tak1	protein_coding	X	14.9016	20.0066	17.347	18.8604	14.897	11.9649	17.2489	10.8386	27.8188	37.4403	35.0876	27.4043	30.2123	29.2204	22.1688	9.81149	6.67438	7.27999	6.87577	12.5058	25.7564	14.0342	10.6463	25.1577	9.75699	12.6277	17.6472	16.3392	24.4718	18.4336	22.1585	16.0558	30.1833	28.9979	13.5989	19.5109	16.534	5.28902	6.39673	2.6905	19.3948	16.2954	10.8647	32.9359	6.34117	16.753
FBgn0029118	ScsbetaG	protein_coding	3L	2.12879	1.53897	0	0.857289	3.72425	4.78595	3.13616	5.41929	10.5093	9.20664	8.59287	12.2847	7.55307	2.43504	3.16697	0	0	1.61777	2.29192	2.77906	0.888152	1.27584	0	1.67718	6.96928	5.82815	8.8236	11.2332	7.44793	10.0547	12.8286	16.0558	9.11193	6.06932	7.93267	9.10508	0	0	1.59918	5.381	1.55158	1.68573	6.03597	0	4.22744	6.93227
FBgn0041160	comm2	protein_coding	3L	0	0	0	0	0.74485	0.797659	1.56808	0	0	0	0	0	0	0	0	1.9623	6.00694	8.08887	4.58384	2.77906	0	0	0	1.67718	1.39386	2.91408	2.64708	0	0	0	0	0	0	0	0	0	0	2.11561	1.59918	0	0	0	0	0	0.704574	1.15538
FBgn0039101	CG16710	protein_coding	3R	0	0	0	0	0.74485	0.39883	0	0	1.23639	1.84133	0	0	0	0	0	0	0.667438	0	0	0	0	0	0	1.67718	0	0	0	0	2.12798	0	1.16624	3.77785	0	0.674369	1.13324	0	1.6534	0	0	0	0	0	0	0	0.704574	0.577689
FBgn0263132	Cht6	protein_coding	X	19.1592	0	0	6.85831	1.4897	4.78595	2.35212	4.74187	1.23639	1.22755	2.86429	0	10.7901	8.52263	4.75045	9.81149	10.0116	12.9422	8.02173	5.55812	0	7.65504	2.12926	8.3859	4.18157	12.6277	4.4118	0	2.12798	1.67578	0	0.944461	8.54243	7.41806	1.13324	1.30073	11.5738	6.34683	3.19837	5.381	3.87895	1.12382	3.62158	1.37233	4.93202	7.50996
FBgn0086674	Tpst	protein_coding	X	7.45078	13.8507	8.67348	5.14373	6.70365	7.97659	8.62443	10.8386	24.7278	18.4133	13.6054	21.7344	39.9234	30.438	22.1688	25.5099	2.00231	1.61777	3.43788	1.38953	0.888152	12.7584	0	1.67718	5.57542	11.6563	4.4118	5.10599	28.7277	15.082	19.826	16.0558	58.658	63.3907	40.7966	33.8189	4.96019	2.11561	3.19837	2.6905	5.43054	6.74292	6.03597	10.9786	11.2732	5.77689
FBgn0011655	Med	protein_coding	3R	15.966	13.8507	13.0102	14.5739	32.7734	23.5309	31.3616	31.8383	17.3095	17.7995	15.7536	14.1746	7.55307	9.74015	14.2514	7.84919	16.0185	15.3689	10.3137	8.33717	13.3223	8.93088	21.2926	31.8664	29.271	29.1408	28.2355	27.5723	15.9599	48.5977	12.8286	13.2225	9.11193	6.74369	6.79943	13.0073	11.5738	3.17341	15.9918	13.4525	20.1706	17.4192	15.6935	12.351	35.2287	35.8167
FBgn0031437	Arpc5	protein_coding	2L	17.0304	18.4676	14.4558	12.8593	37.2425	22.7333	27.4414	29.1287	33.3825	39.2816	30.0751	30.2392	18.3432	21.9153	9.5009	15.6984	11.3464	8.08887	13.7515	12.5058	14.2104	10.2067	14.9048	13.4174	34.8464	22.3413	14.1178	16.3392	40.4316	18.4336	33.8209	25.5005	10.8204	16.8592	11.3324	15.6087	23.1476	7.40463	7.99592	10.762	17.8432	22.4764	26.5583	26.0742	26.7738	21.9522
FBgn0039274	CG11920	protein_coding	3R	0	0	0	0	2.23455	0.797659	0.784039	2.70964	1.85459	3.06888	5.01251	3.7799	1.07901	0	0	0	0.667438	2.42666	1.14596	0	0.888152	0	0	0	2.78771	4.85679	0.88236	2.04239	4.25596	8.37891	4.66495	4.72231	0.569496	0.674369	0	0	0	0	0	2.6905	0	1.12382	1.20719	0	2.11372	6.35458
FBgn0037050	ICA69	protein_coding	3L	0	0	0	0	0	0	0	0	0	0	0	0	0	1.21752	0	0	0	0	0	0	0	0	0	0	0	0	0	0	0	0	0	0	0	0	0	0	0	0	0	0	0	0	0	0	0	0
FBgn0033783	CG17019	protein_coding	2R	1.0644	6.15588	7.2279	1.71458	2.23455	3.58947	2.35212	2.70964	1.85459	1.22755	2.14822	0	2.15802	0	0	0	15.3511	11.3244	24.0652	11.1162	3.55261	2.55168	4.25852	6.70872	5.57542	1.94272	1.76472	2.04239	4.25596	3.35157	1.16624	0	3.98647	2.02311	0	0	8.26699	6.34683	15.9918	21.524	3.10316	4.49528	4.82878	8.23397	1.40915	2.88845
FBgn0265721	lncRNA:CR44528	ncRNA	3L	0	0	0	0	0	0	0	0	0	0	0	0	0	0	0	0	0	0	0	0	0	0	0	0	0	0	0	0	0	0	0	0	0	0	0	0	0	0	0	0	0	0	0	0	0	0
FBti0063549		transposable_element	4	0	0	0	0	0	0	0	0	0	0	0	0	0	0	0	0	0	0	0	0	0	0	0	0	0	0	0	0	0	0	0	0	0	0	0	0	0	0	0	0	0	0	0	0	0	0
FBgn0020272	mst	protein_coding	X	0	0	0	0.857289	0	1.19649	0	0.677411	2.47278	4.91021	3.58036	1.88995	0	1.21752	0	1.9623	0	0	1.14596	0	0	3.82752	4.25852	1.67718	0	1.94272	0	1.0212	4.25596	3.35157	3.49871	5.66677	1.13899	0	0	0	0	0	0	0	0	0.56191	3.62158	0	0.704574	1.15538
FBgn0039731	Sas-6	protein_coding	3R	0	0	0	0	0	0	0	0	0	0	0	0	0	0	0	0	0	0	0	0	0	0	0	0	0	0	0.88236	0	0	0	0	0	0	0	0	0	0	0	0	0	0	0	0	0	0	0
FBgn0017558	Pdk	protein_coding	2R	223.523	10.7728	46.2586	59.1529	19.3661	15.1555	18.8169	14.2256	5.56376	7.36531	14.3215	8.50477	26.9753	23.1328	25.3357	15.6984	63.4066	29.1199	27.5031	27.7906	8.88152	10.2067	19.1633	28.5121	18.1201	17.4845	26.4708	18.3816	10.6399	15.082	18.6598	10.3891	41.0037	41.8109	31.7307	27.3152	57.8689	64.5261	39.9796	34.9765	6.20633	6.18101	18.1079	9.6063	16.2052	22.5299
FBti0019466		transposable_element	3R	0	0	0	0	0	0	0	0	0	0	0	0	0	0	0	0	0	0	0	0	0.888152	0	0	0	0	0	0.88236	1.0212	0	0	0	0	0	0	0	0	0	0	0	2.6905	0	0	0	0	0	0
FBgn0035203	CG9149	protein_coding	3L	3.19319	0	4.33674	0	9.68304	8.37542	5.48828	6.77411	8.03654	13.5031	12.1732	5.66985	44.2394	41.3956	33.2532	25.5099	1.33488	1.61777	0	0	0	2.55168	0	0	9.75699	11.6563	5.29416	7.14838	13.8319	3.35157	8.16366	11.3335	42.1427	35.7416	36.2636	40.3225	1.6534	0	12.7935	8.07151	0.775791	1.12382	2.41439	0	3.52287	6.93227
FBgn0040342	CG3706	protein_coding	X	0	0	0	0	0	0	0	0	0	0	0	0	0	0	0	0	0	0	0	0	0	0	0	0	0	0	0	0	0	0	0	0	0	0	0	0	0	0	0	0	0	0	0	0	0	0
FBgn0015513	mbc	protein_coding	3R	1.0644	0	1.44558	0	1.4897	4.78595	3.9202	0.677411	0	1.22755	2.14822	0	1.07901	1.21752	0	0	0.667438	2.42666	1.14596	0	0	1.27584	0	0	2.78771	7.77087	4.4118	3.06359	1.06399	3.35157	3.49871	0	0	0.674369	1.13324	0	3.3068	2.11561	1.59918	0	0.775791	0	0	1.37233	3.52287	2.88845
FBgn0033886	Rpn13	protein_coding	2R	143.694	357.041	248.64	310.339	58.8431	67.0034	79.188	81.2893	21.0186	26.3924	25.7786	26.4593	82.0048	91.3139	101.343	76.5296	409.139	369.662	395.357	427.975	425.425	141.618	342.811	201.262	86.419	113.649	86.4713	107.226	11.7039	10.0547	18.6598	21.7226	84.8548	90.3655	97.4585	92.3515	459.645	428.411	478.156	368.599	498.834	381.537	275.24	518.74	78.2077	73.9442
FBti0019593		transposable_element	X	0	0	0	0	0	0	0	0	0	0	0	0	0	0	0	0	0	0	0	0	0	0	0	0	0	0	0	0	0	0	0	0	0	0	0	0	0	0	0	0	0	0	0	0	0	0.577689
FBgn0036248	ssp	protein_coding	3L	4.25759	0	2.89116	0.857289	8.93819	6.7801	7.84039	9.48375	3.09098	3.68265	5.72858	2.83492	3.23703	3.65256	0	3.9246	6.00694	7.27999	2.29192	1.38953	2.66446	1.27584	2.12926	3.35436	6.96928	7.77087	9.70596	9.19078	3.19197	0	3.49871	1.88892	1.13899	4.04622	7.93267	3.90218	1.6534	3.17341	1.59918	0	3.87895	3.93337	3.62158	6.86164	10.5686	10.3984
FBti0019791		transposable_element	2L	0	0	0	0	0	0	0	0	0	0	0	0	0	0	0	0	0	0	0	0	0	0	0	0	0	0	0	0	0	0	0	0	0	0	0	0	0	0	0	0	0	0	0	0	0	0
FBgn0030628	CG9114	protein_coding	X	0	0	0	0	0	0	0	0	0	0	0	0	0	1.21752	0	0	0	0	0	0	0	0	0	0	0	0	0.88236	0	0	0	0	0	0	0	0	0	0	0	0	0	0	0	0	0	0	0
FBti0063991		transposable_element	4	0	0	0	0	0	0	0	0.677411	0	1.84133	0	0	1.07901	0	0	0	0	0	0	0	0	1.27584	0	0	0	0	0	0	0	0	0	0	0	0	0	0	0	1.0578	0	0	0	0	0	0	0	0
FBgn0086357	Sec61alpha	protein_coding	2L	29.8031	13.8507	21.6837	18.8604	9.68304	10.3696	15.6808	14.903	16.0731	12.8893	12.1732	10.3947	12.9481	7.30511	23.7523	19.623	10.679	16.1777	14.8975	6.94764	7.99337	12.7584	29.8096	11.7403	5.57542	6.79951	8.8236	14.2968	26.5998	30.1641	20.9923	31.1672	22.7798	20.9054	14.7321	20.8116	1.6534	8.46244	0	8.07151	12.4127	12.9239	15.6935	4.11698	9.15946	6.93227
FBgn0024733	RpL10	protein_coding	3L	686.536	494.009	708.334	459.507	182.488	181.069	185.033	152.417	618.814	722.414	711.776	877.882	659.275	814.52	703.067	790.806	375.768	369.662	433.173	437.702	683.877	881.606	973.071	959.347	245.319	257.41	251.473	242.024	1142.73	1054.07	1239.71	1147.52	894.108	1040.55	860.128	1248.7	874.647	705.556	810.786	756.031	968.187	1012	1199.95	773.993	390.334	381.853
FBgn0035590	Prpk	protein_coding	3L	0	0	0	0	1.4897	1.59532	1.56808	0.677411	0	0	2.14822	0.944975	3.23703	0	0	0	0	0	0	0	0.888152	0	0	0	0	0	2.64708	4.08479	1.06399	0	0	0	1.13899	0	1.13324	1.30073	0	0	0	0	0	1.68573	1.20719	1.37233	0.704574	0.577689
FBgn0024689	fws	protein_coding	2L	2.12879	1.53897	10.1191	10.2875	8.19335	5.98244	6.27232	6.77411	4.32737	7.97908	7.16073	3.7799	2.15802	2.43504	3.16697	0	5.3395	3.23555	6.87577	4.16859	3.55261	1.27584	14.9048	0	6.96928	11.6563	7.94124	12.2544	8.51192	3.35157	5.83118	3.77785	2.84748	2.02311	1.13324	3.90218	0	3.17341	4.79755	0	8.5337	5.6191	3.62158	4.11698	9.86404	8.08765
FBgn0017581	Lk6	protein_coding	3R	268.228	173.903	359.949	298.337	301.664	299.521	272.846	281.125	265.824	285.406	263.515	286.327	123.007	127.839	104.51	105.964	254.961	289.582	240.652	279.295	221.15	290.892	421.593	526.634	321.981	392.429	281.473	360.483	428.788	537.926	416.347	374.007	271.649	328.418	285.576	256.243	249.663	327.919	243.076	244.836	287.043	947.381	403.203	315.635	432.608	382.43
FBgn0020249	stck	protein_coding	3R	43.6403	16.9287	36.1395	27.4332	14.897	13.959	17.2489	12.8708	11.1275	26.3924	17.1857	17.0095	96.0319	85.2263	90.2586	62.7936	17.3534	15.3689	19.4813	11.1162	20.4275	29.3443	12.7755	18.449	20.9078	11.6563	7.05888	19.4028	18.0878	23.461	18.6598	12.278	47.8376	34.3928	47.596	65.0363	14.8806	15.8671	20.7894	10.762	5.43054	16.8573	26.5583	10.9786	12.6823	10.9761
FBgn0033050	Pngl	protein_coding	2R	26.6099	33.8573	33.2483	28.2905	30.5388	15.9532	32.1456	23.032	6.80015	9.82041	8.59287	10.3947	4.31604	2.43504	4.75045	17.6607	48.0555	46.1066	52.7142	37.5173	36.4142	38.2752	27.6804	30.1892	33.4525	20.3985	37.9415	19.4028	9.57591	10.0547	13.9948	8.50015	6.26445	6.06932	3.39972	2.60145	21.4942	49.7168	23.9878	5.381	45.7717	40.4575	41.0446	37.0529	32.4104	34.6614
FBgn0051139	CG31139	protein_coding	3R	0	0	0	0	0	0	0	0	0	0	0	0	0	0	0	0	0	0	0	0	0	0	0	0	0	0	0	0	0	0	0	0	0	0	0	0	0	0	0	0	0	0	0	0	0	0
FBgn0040600	CG13631	protein_coding	3R	15.966	0	13.0102	12.002	2.23455	2.39298	0	1.35482	27.8188	22.7097	27.9268	24.5693	21.5802	34.0905	25.3357	43.1706	4.67207	2.42666	0	0	0	7.65504	8.51703	3.35436	4.18157	5.82815	2.64708	2.04239	39.3676	33.5157	29.1559	29.2783	20.5018	9.44117	23.798	20.8116	0	3.17341	4.79755	2.6905	0.775791	6.18101	10.8647	2.74466	5.63659	5.77689
FBti0019205		transposable_element	2L	1.0644	0	0	1.71458	0.74485	1.19649	0	0.677411	0.618195	0.613776	0	0.944975	0	0	0	0	0	0	1.14596	0	0	0	0	0	0	0	0	0	0	0	1.16624	0	0.569496	0.674369	2.26648	0	0	0	0	0	0	0	0	0	0	0
FBgn0024329	Mekk1	protein_coding	3R	2.12879	3.07794	5.78232	4.28645	17.1315	15.9532	9.40847	13.5482	6.18195	4.29643	2.14822	1.88995	3.23703	0	3.16697	3.9246	1.33488	3.23555	1.14596	0	5.32891	6.3792	2.12926	3.35436	8.36313	12.6277	17.6472	9.19078	7.44793	10.0547	6.99742	4.72231	2.27798	4.72059	1.13324	2.60145	0	1.0578	1.59918	0	5.43054	5.6191	8.45036	0	11.2732	9.82072
FBgn0030012	CG18262	protein_coding	X	1.0644	0	0	0	1.4897	1.19649	0	2.03223	3.09098	0.613776	0	0.944975	0	1.21752	0	0	0.667438	0	0	1.38953	1.7763	5.10336	0	1.67718	2.78771	2.91408	5.29416	5.10599	3.19197	0	0	2.83338	1.13899	0.674369	0	2.60145	3.3068	1.0578	0	0	1.55158	2.80955	2.41439	1.37233	4.93202	5.1992
FBgn0004842	RYa-R	protein_coding	3R	0	0	0	0	0	0	0	0	0	0	0	0	0	0	0	0	0	0	0	0	0	0	0	0	0	0	0	0	0	0	0	0	0	0	0	0	0	0	0	0	0	0	0	0	0	0
RR48902_transposable_element		transposable_element	2L	0	0	0	0	0	0	0	0	0	0	0	0	0	0	0	0	0	0	0	0	0	0	0	0	0	0	0	0	0	0	1.16624	0	0	0	0	0	0	0	0	0	0	0	0	0	0	0
FBti0060875		transposable_element	2R	0	0	0	0	0	0	0	0	0	0	0	0	0	0	0	0	0	0	0	0	0	0	0	0	0	0	1.76472	0	0	0	1.16624	0	0	0	0	0	3.3068	0	0	0	0	0	0	0	0	0
FBgn0039465	Tsp97E	protein_coding	3R	8.51518	29.2404	7.2279	4.28645	17.8764	23.1321	33.7137	29.8061	16.0731	17.1857	10.7411	17.0095	12.9481	17.0453	12.6679	9.81149	16.6859	24.2666	9.16769	25.0115	23.092	19.1376	19.1633	15.0946	32.0587	35.9403	23.8237	25.5299	15.9599	13.4063	15.1611	21.7226	13.6679	18.208	11.3324	11.7065	21.4942	25.3873	27.1861	43.048	53.5296	15.1716	10.8647	32.9359	18.3189	24.8406
FBgn0032770	CG13086	protein_coding	2L	0	0	0	0	0	0.39883	0	0	0	0	0	0	0	0	0	0	1.33488	2.42666	3.43788	5.55812	0	0	0	0	0	0	0	0	0	0	0	0.944461	0	0	0	0	0	1.0578	0	2.6905	0	0	0	0	0	0
FBgn0013343	Syx1A	protein_coding	3R	59.6062	26.1625	37.5851	54.8665	36.4976	39.883	30.5775	43.3543	74.8016	86.5424	55.1376	67.0932	70.1357	71.8336	60.1724	58.869	58.7345	80.8887	67.6117	54.1916	19.5393	47.2061	25.5511	20.1262	51.5726	55.3675	40.5886	46.9751	37.2397	53.625	30.3222	33.0561	48.4071	39.7878	43.0631	23.4131	205.021	153.382	220.687	158.74	17.0674	28.6574	30.1798	15.0956	26.7738	35.2391
FBgn0001247	Ide	protein_coding	3L	4.25759	4.61691	4.33674	2.57187	2.9794	3.19064	3.13616	2.03223	6.80015	7.36531	6.44466	3.7799	8.63208	12.1752	7.91742	5.8869	13.3488	4.85332	9.16769	1.38953	1.7763	5.10336	6.38777	3.35436	5.57542	5.82815	3.52944	6.12718	4.25596	8.37891	6.99742	3.77785	9.11193	12.1386	9.06591	6.50363	6.61359	5.28902	7.99592	2.6905	4.65475	2.24764	4.82878	2.74466	4.22744	2.88845
FBgn0032858	CG10949	protein_coding	2L	1.0644	1.53897	1.44558	0	2.9794	1.19649	0.784039	0	3.09098	2.4551	1.43215	1.88995	0	0	0	3.9246	2.00231	4.04444	1.14596	1.38953	0.888152	1.27584	2.12926	0	1.39386	0.971359	1.76472	1.0212	1.06399	1.67578	3.49871	0	0	0	0	3.90218	3.3068	0	3.19837	0	2.32737	3.37146	1.20719	1.37233	0	1.15538
FBgn0001083	fw	protein_coding	X	1.0644	3.07794	1.44558	2.57187	2.23455	3.19064	0.784039	4.74187	0	0	0	0	1.07901	0	0	1.9623	1.33488	0	3.43788	0	2.66446	2.55168	4.25852	8.3859	1.39386	0.971359	1.76472	2.04239	0	0	0	0	1.70849	1.34874	1.13324	2.60145	0	2.11561	0	0	0	1.12382	3.62158	0	1.40915	0.577689
FBgn0035425	CG17746	protein_coding	3L	12.7728	46.1691	14.4558	12.002	35.7528	30.7099	43.1222	35.2254	55.6376	52.1709	64.4466	54.8085	8.63208	10.9577	22.1688	11.7738	814.274	615.563	479.012	719.776	15.9867	14.0342	4.25852	15.0946	76.662	67.9951	67.9417	76.5898	37.2397	25.1367	26.8234	48.1675	3.98647	3.37185	10.1991	5.2029	881.261	790.18	668.459	691.459	163.692	15.7335	25.3511	148.211	73.2757	101.673
FBgn0002940	ninaE	protein_coding	3R	1.0644	0	0	0	0	0	0	0	0	0	0	0.944975	0	1.21752	0	0	0	0	0	0	0	0	0	0	0	0	0	0	0	0	0	0	0	0	0	0	0	1.0578	0	0	0	0	0	0	0	0
FBgn0027873	Cpsf100	protein_coding	3R	2.12879	1.53897	1.44558	7.7156	2.23455	5.98244	6.27232	6.77411	4.32737	4.91021	6.44466	7.5598	0	1.21752	1.58348	0	1.33488	4.85332	2.29192	0	2.66446	3.82752	0	6.70872	11.1508	5.82815	9.70596	14.2968	18.0878	13.4063	15.1611	14.1669	2.84748	2.69748	2.26648	0	3.3068	3.17341	1.59918	2.6905	4.65475	3.37146	0	5.48931	9.15946	8.08765
FBgn0262517	Ltn1	protein_coding	3L	5.32199	10.7728	24.5749	11.1448	9.68304	12.7625	9.40847	16.9353	6.80015	17.7995	8.59287	11.3397	3.23703	9.74015	3.16697	3.9246	15.3511	7.27999	3.43788	11.1162	13.3223	19.1376	17.0341	8.3859	11.1508	12.6277	12.353	16.3392	7.44793	11.7305	16.3273	8.50015	3.98647	4.72059	3.39972	0	3.3068	8.46244	7.99592	2.6905	13.1884	30.9051	9.65755	13.7233	9.86404	9.82072
FBgn0267626	lncRNA:CR45964	ncRNA	3L	0	0	0	0	0	0	0	0	0	0	0	0	0	0	0	0	0	0	0	0	0	0	0	0	0	0	0	0	0	0	0	0	0	0	0	0	0	0	0	0	0	0	0	0	0	0
FBgn0266625	asRNA:CR45132	ncRNA	2R	0	0	0	0	0	0	0	0	0	0	0	0	0	0	0	0	0	0	0	0	0	0	0	0	0	0	0	0	0	0	0	0	0	0	0	0	0	0	0	0	0	0	0	0	0	0
FBgn0083040	snoRNA:Psi18S-1854c	snoRNA	X	0	0	0	0	0	0	0	0	0	0	0.716073	0	0	0	0	0	0	0	0	0	0	0	0	0	0	0	0	0	0	0	0	0	0	0	0	0	0	0	0	0	0	0	0	0	0	0
FBgn0038197	foxo	protein_coding	3R	17.0304	3.07794	2.89116	5.14373	9.68304	5.98244	7.05635	6.77411	18.5459	10.4342	15.0375	10.3947	26.9753	25.5679	36.4201	29.4345	20.0231	64.711	115.742	44.4649	2.66446	5.10336	4.25852	6.70872	4.18157	7.77087	4.4118	4.08479	5.31995	13.4063	10.4961	7.55569	24.4883	24.9517	20.3983	10.4058	24.801	20.0983	78.36	51.1195	8.5337	5.6191	6.03597	6.86164	4.93202	5.1992
FBti0060559		transposable_element	2L	0	0	0	0	0	0	0	0	0	0	0	0	0	0	0	0	0	0	0	0	0	0	0	0	0	0	0	0	0	0	0	0	0	0	0	0	0	0	0	0	0	0	0	0	0	0
FBgn0036897	Rnf146	protein_coding	3L	2.12879	1.53897	0	0.857289	0.74485	3.19064	1.56808	5.41929	1.23639	3.68265	0.716073	2.83492	1.07901	3.65256	1.58348	0	4.00463	1.61777	3.43788	5.55812	1.7763	0	2.12926	3.35436	5.57542	0.971359	0.88236	4.08479	0	0	1.16624	0.944461	1.70849	0.674369	0	1.30073	4.96019	5.28902	7.99592	0	2.32737	1.68573	1.20719	0	0.704574	1.15538
FBgn0035523	Ctl1	protein_coding	3L	28.7387	9.23381	11.5646	24.8614	8.93819	12.7625	12.5446	14.2256	16.0731	8.59286	21.4822	7.5598	18.3432	18.2628	14.2514	3.9246	4.00463	4.04444	3.43788	6.94764	3.55261	25.5168	12.7755	6.70872	16.7263	9.71359	10.5883	6.12718	3.19197	8.37891	8.16366	8.50015	6.26445	10.1155	9.06591	10.4058	3.3068	2.11561	7.99592	2.6905	1.55158	6.74292	9.65755	2.74466	5.63659	4.62152
FBgn0263832	Rcd5	protein_coding	3L	19.1592	18.4676	21.6837	25.7187	29.794	25.9239	32.1456	25.0642	22.255	23.3235	25.0625	18.8995	19.4222	19.4803	14.2514	3.9246	34.7068	25.8844	14.8975	15.2848	26.6446	34.4477	29.8096	33.5436	41.8157	27.1981	35.2944	41.8691	18.0878	16.7578	24.491	18.8892	8.54243	15.5105	13.5989	3.90218	16.534	15.8671	9.5951	10.762	44.2201	61.8101	44.6662	46.6592	52.8431	32.3506
FBgn0043841	vir-1	protein_coding	2L	19.1592	15.3897	18.7925	35.1489	14.1521	11.5661	14.8967	15.5804	0	1.84133	2.14822	2.83492	26.9753	38.9606	57.0054	27.4722	44.7183	27.5022	29.795	36.1277	4.44076	10.2067	6.38777	1.67718	33.4525	39.8257	32.6473	16.3392	0	1.67578	2.33247	0.944461	68.909	78.9012	75.927	88.4493	39.6815	43.37	30.3845	69.9531	4.65475	25.286	13.2791	9.6063	44.3882	28.8845
FBgn0052251	Claspin	protein_coding	3L	0	0	0	0	0	0.39883	0.784039	2.70964	1.23639	2.4551	0	0	2.15802	0	0	0	4.00463	1.61777	2.29192	0	0	0	0	1.67718	1.39386	0.971359	0.88236	0	0	3.35157	1.16624	2.83338	0	2.02311	0	0	0	0	0	5.381	0	0	0	0	0	0.577689
FBgn0032116	Mco1	protein_coding	2L	0	0	0	0	2.9794	2.39298	5.48828	1.35482	0	0	0	0	0	0	0	0	0	0	0	0	0	0	0	0	1.39386	0	0.88236	0	0	0	0	0	0	0.674369	0	0	0	0	0	0	0	0	0	0	0.704574	1.15538
FBgn0004915	TfIIB	protein_coding	2L	12.7728	15.3897	15.9014	10.2875	17.1315	11.1672	17.2489	15.5804	19.7822	17.1857	10.7411	20.7894	16.1852	28.0029	12.6679	23.5476	13.3488	13.7511	10.3137	16.6743	7.10522	2.55168	8.51703	8.3859	8.36313	7.77087	7.94124	7.14838	10.6399	5.02735	9.32989	8.50015	9.11193	8.09243	9.06591	11.7065	8.26699	6.34683	6.39673	8.07151	6.20633	4.49528	6.03597	2.74466	14.7961	8.08765
FBgn0034908	CG5543	protein_coding	2R	2.12879	1.53897	0	2.57187	2.9794	1.99415	2.35212	1.35482	0	0	4.29644	0.944975	0	0	0	3.9246	3.33719	4.85332	3.43788	4.16859	0	1.27584	6.38777	0	6.96928	0.971359	0.88236	0	3.19197	0	1.16624	0.944461	1.70849	0.674369	1.13324	0	4.96019	6.34683	0	0	0.775791	3.37146	2.41439	1.37233	3.52287	5.77689
FBgn0266372	asRNA:CR45016	ncRNA	3R	0	0	0	0	0	0	0	0	0	0	0	0	0	0	0	0	0	0	0	0	0	0	0	0	0	0	0	0	0	0	0	0	0	0	0	1.30073	0	0	0	0	0	0	0	0	0	0
FBgn0038952	CG7069	protein_coding	3R	1.0644	0	0	0	0	0	0	0	0	0	0	0	1.07901	1.21752	0	0	1.33488	0.808887	0	2.77906	0	1.27584	0	0	1.39386	0	0.88236	0	0	0	0	0	0	0.674369	0	0	6.61359	0	0	5.381	0	1.12382	0	0	0	0.577689
FBgn0032809	CG13078	protein_coding	2L	0	0	0	0	0	0	0	0	0	0	0	0	0	0	0	0	0	0	0	0	0	0	0	0	0	0	0	0	0	0	0	0	0	0	0	0	0	0	0	0	0	1.12382	0	0	0	0
FBgn0030412	Tomosyn	protein_coding	X	18.0948	20.0066	26.0204	22.2895	13.4073	8.37542	7.84039	5.41929	5.56376	9.82041	13.6054	4.72487	8.63208	14.6102	15.8348	9.81149	21.358	18.6044	19.4813	15.2848	15.0986	26.7926	14.9048	8.3859	8.36313	9.71359	10.5883	6.12718	6.38394	6.70313	12.8286	3.77785	10.8204	11.4643	13.5989	3.90218	16.534	17.9827	14.3927	10.762	9.30949	7.86674	12.0719	8.23397	9.15946	13.2869
FBgn0000139	ash2	protein_coding	3R	1.0644	1.53897	1.44558	0.857289	5.21395	3.9883	3.9202	5.41929	2.47278	3.68265	2.86429	0.944975	0	0	1.58348	1.9623	0.667438	0.808887	0	1.38953	0.888152	1.27584	0	0	8.36313	2.91408	6.17652	2.04239	9.57591	10.0547	8.16366	10.3891	2.27798	0.674369	0	1.30073	0	0	0	0	0	3.37146	3.62158	0	3.52287	4.04383
FBgn0000042	Act5C	protein_coding	X	250.133	1374.3	374.405	468.08	1186.55	1139.06	971.425	1035.76	67.3833	49.1021	22.9143	17.9545	113.296	64.5285	87.0916	121.663	124.811	164.204	191.376	211.208	449.405	358.511	598.321	177.781	780.559	706.178	637.064	519.789	61.7114	33.5157	76.9716	34.9451	29.6138	36.4159	28.331	24.7138	84.3233	66.6417	139.129	180.264	796.737	241.621	493.742	572.261	680.619	508.944
FBgn0005670	Cyp4d1	protein_coding	X	0	0	0	0	0	0	0	0	0	0	0.716073	0	0	0	0	0	0	0	0	0	0	0	0	0	0	0	0	0	0	0	0	0	0	2.02311	0	1.30073	0	0	0	0	0	0.56191	0	0	0	0
FBgn0031769	CG9135	protein_coding	2L	3.19319	16.9287	8.67348	8.57289	25.3249	21.138	23.5212	21.6771	6.18195	4.91021	6.44466	2.83492	2.15802	0	0	3.9246	12.6813	5.66221	4.58384	2.77906	15.0986	8.93088	14.9048	8.3859	11.1508	23.3126	19.4119	9.19078	4.25596	3.35157	8.16366	3.77785	0	0.674369	0	0	8.26699	5.28902	6.39673	2.6905	13.1884	11.8001	10.8647	5.48931	16.2052	18.4861
FBgn0031100	CG1504	protein_coding	X	0	0	0	0	0	0.39883	0	0	0	0	0	0	0	0	0	0	0	0	0	0	0	0	0	0	0	0	0	0	0	0	0	0	0	0	0	0	0	0	0	0	0	0	0	0	0	0
FBgn0035102	CG7049	protein_coding	3L	0	0	0	0	0	0	0	0	0	0	0	0	0	0	0	0	0	0	0	0	0	0	0	0	0	0	0	0	0	0	0	0	0	0	0	0	0	0	0	0	0	0	0	0	0	0
FBti0061391		transposable_element	3L	0	0	0	0	0	0	0	0	0	0	0	0	0	0	0	0	0	0	0	0	0	0	0	0	0	0	0	0	0	0	0	0	0	0	0	0	0	0	1.59918	0	0	0	0	0	0	0
FBgn0029529	CG13365	protein_coding	X	2.12879	0	1.44558	0.857289	2.23455	1.19649	0	0.677411	4.94556	1.22755	0.716073	0.944975	2.15802	0	6.33393	5.8869	1.33488	0.808887	0	4.16859	0.888152	0	2.12926	1.67718	5.57542	0.971359	3.52944	3.06359	0	1.67578	3.49871	1.88892	2.84748	6.06932	3.39972	3.90218	0	1.0578	0	0	0	0	0	0	2.11372	3.46614
FBgn0265301	lncRNA:CR44274	ncRNA	2R	0	0	0	0	0	0	0	0	0	0	0	0	0	0	0	0	0	0	0	0	0	0	0	0	0	0	0	0	0	0	0	0	0	0	0	0	0	0	0	0	0	0	0	0	0	0
FBgn0263846	CG43707	protein_coding	2L	0	0	0	0	0	0	0	0.677411	0	1.22755	1.43215	0.944975	8.63208	4.87007	4.75045	3.9246	1.33488	3.23555	3.43788	1.38953	0	0	0	0	2.78771	0	0.88236	0	2.12798	0	0	3.77785	0	0	0	0	9.92039	7.40463	4.79755	0	0	0	0	0	2.11372	0
FBgn0020238	14-3-3epsilon	protein_coding	3R	668.441	303.177	318.028	367.777	364.231	410.794	428.086	418.64	142.185	147.306	141.066	120.957	249.251	247.156	242.273	208.004	256.296	215.164	176.478	262.621	166.084	310.029	189.504	270.026	308.042	379.801	390.003	341.08	65.9674	97.1954	71.1404	61.39	102.509	135.548	109.924	88.4493	200.061	188.289	163.117	226.002	172.226	215.774	246.268	167.424	318.467	325.817
FBgn0033733	CG8834	protein_coding	2R	0	0	0	0	0	0	0	0	0	0	0	0	0	0	0	0	0	0	0	0	0	0	0	0	0	0	0	0	0	0	0	0	0	0	0	0	0	0	0	0	0.775791	0	0	0	0	0
FBgn0262204	mir-2279	pre_miRNA	2R	0	0	0	0.857289	0	0	0	0	0	0	0	0	0	0	0	0	0	0	0	0	0	0	0	0	0	0	0	0	0	0	0	0	0	0	0	0	0	0	0	0	0	0	0	0	0	0
FBgn0038476	kuk	protein_coding	3R	1.0644	3.07794	2.89116	0	23.0903	36.6923	30.5775	29.1287	14.8367	3.06888	4.29644	4.72487	2.15802	1.21752	4.75045	5.8869	6.67438	8.08887	9.16769	12.5058	0	1.27584	4.25852	0	29.271	17.4845	18.5296	14.2968	2.12798	5.02735	8.16366	0	1.70849	2.69748	1.13324	7.80435	9.92039	5.28902	3.19837	0	6.20633	1.68573	1.20719	8.23397	10.5686	14.4422
FBgn0085411	CG34382	protein_coding	3L	0	0	0	0	0	0	0	0	0	0	0	0	0	0	0	0	0	0	0	0	0	0	0	0	0	0	0	0	0	0	0	0	0	0	2.26648	0	0	0	0	0	0	0	0	0	0	0
FBgn0031560	CG16713	protein_coding	2L	0	0	0	0	0	0.39883	0	0	0	0	0	0	4.31604	4.87007	3.16697	19.623	32.7045	54.1955	95.1148	84.7613	0	0	0	0	0	0	0	0	0	0	0	0.944461	9.68142	10.1155	4.53295	14.308	3.3068	11.6358	1.59918	99.5486	0	0	0	0	0	0
FBgn0032034	Rcd4	protein_coding	2L	1.0644	0	1.44558	0	1.4897	1.19649	0.784039	2.03223	1.23639	0.613776	0.716073	0.944975	0	0	1.58348	0	2.00231	0.808887	0	0	0.888152	2.55168	0	0	0	0	0	0	2.12798	1.67578	0	0	0.569496	1.34874	0	0	1.6534	0	0	0	1.55158	0.56191	0	0	0.704574	0
FBgn0261636	lncRNA:CR42719	ncRNA	3L	0	0	0	0	0	0	0	0	0	0	0	0	0	0	0	0	0	0	0	1.38953	0	0	0	0	0	0	0	0	0	1.67578	0	0	0	0	0	0	0	0	0	0	0	0.56191	0	0	0	0
FBgn0032881	Amacr	protein_coding	2L	3.19319	0	0	0	0.74485	2.39298	0.784039	0.677411	2.47278	0.613776	0.716073	0.944975	5.39505	0	1.58348	0	0.667438	1.61777	3.43788	1.38953	0.888152	2.55168	2.12926	5.03154	1.39386	3.88544	0.88236	1.0212	1.06399	0	2.33247	0	1.13899	2.69748	2.26648	0	0	0	0	0	3.10316	0.56191	4.82878	2.74466	2.11372	2.88845
FBgn0035526	CG1316	protein_coding	3L	4.25759	6.15588	2.89116	10.2875	17.1315	13.1614	16.4648	16.2579	19.7822	27.6199	14.3215	25.5143	25.8962	9.74015	9.5009	7.84919	0	2.42666	1.14596	4.16859	3.55261	6.3792	8.51703	6.70872	5.57542	14.5704	7.94124	11.2332	14.8959	13.4063	15.1611	20.7782	10.8204	16.1849	5.66619	14.308	3.3068	0	0	0	6.20633	3.37146	7.24316	1.37233	10.5686	10.9761
FBgn0037850	CG14695	protein_coding	3R	0	0	0	0	0	0	0	0	0	0	0	0	0	0	0	0	0	0	0	0	0	0	0	0	0	0	0	0	0	0	0	0	0	0	0	0	0	0	0	0	0	0	0	0	0	0
FBti0062487		transposable_element	2R	0	0	0	0	0	0	0	0	0	0	0	0	0	0	0	0	0	0	0	0	0	0	0	0	0	0	0	0	0	0	0	0	0	0	0	0	0	0	0	0	0	0	0	0	0	1.15538
FBti0062449		transposable_element	2R	0	0	0	0	0	0	0	0	0	0	0	0.944975	0	0	0	0	0	0	0	0	0	0	0	0	0	0	0	0	0	3.35157	0	0	0	0	0	0	0	0	0	0	0	0	0	0	0	0
FBgn0267793	lncRNA:CR45232	ncRNA	2R	0	0	0	0	8.93819	9.17308	9.40847	4.74187	0	0.613776	0	0	0	0	0	0	0	0	0	0	0	1.27584	0	0	11.1508	5.82815	5.29416	0	1.06399	0	0	0	0	0	0	1.30073	0	0	0	0	0.775791	0.56191	0	0	8.45489	0.577689
FBti0062422		transposable_element	2R	0	0	0	0	0	0	0	0	0	0	0	0	0	0	0	0	0	0	0	0	0	0	0	0	0	0	0	1.0212	0	0	0	0	0	0	0	0	0	0	0	0	0	0	0	0	0	0
FBgn0040394	CG16903	protein_coding	X	12.7728	3.07794	2.89116	4.28645	9.68304	8.77425	17.2489	11.516	14.8367	12.2755	14.3215	13.2296	10.7901	9.74015	4.75045	5.8869	5.3395	3.23555	2.29192	1.38953	8.88152	5.10336	4.25852	1.67718	8.36313	14.5704	11.4707	10.212	20.2158	6.70313	17.4936	10.3891	9.11193	4.04622	6.79943	7.80435	6.61359	5.28902	3.19837	8.07151	7.75791	11.2382	8.45036	5.48931	9.86404	9.24303
FBgn0265909	lncRNA:CR44698	ncRNA	2L	0	0	0	0	0	0	0	0	0	0	0	0	0	0	0	0	0	0	0	0	0	0	0	0	0	0	0	0	0	0	0	0	0	0	0	0	0	0	0	0	0	0.56191	0	0	0	0
FBgn0037908	dpr5	protein_coding	3R	0	0	0	0	0	0	0	0	0	0	0	0	0	0	0	0	0	0	0	0	0	0	0	0	0	0	0	0	0	0	0	0	0.569496	0	0	0	0	0	0	0	0	0	0	0	0	0
FBgn0035872	Cpsf6	protein_coding	3L	5.32199	7.69484	2.89116	3.42916	2.9794	8.77425	2.35212	4.74187	4.94556	6.75153	6.44466	7.5598	6.47406	1.21752	3.16697	3.9246	10.679	4.04444	4.58384	6.94764	9.76967	6.3792	8.51703	6.70872	6.96928	7.77087	6.17652	4.08479	11.7039	6.70313	11.6624	15.1114	7.97294	2.69748	6.79943	3.90218	16.534	10.578	7.99592	10.762	8.5337	3.93337	13.2791	6.86164	7.04574	5.77689
FBgn0026713	l(1)G0007	protein_coding	X	4.25759	0	1.44558	6.00102	5.21395	3.58947	3.9202	7.45152	2.47278	3.06888	6.44466	0.944975	0	2.43504	4.75045	0	2.66975	2.42666	5.72981	1.38953	0.888152	12.7584	10.6463	13.4174	9.75699	2.91408	8.8236	4.08479	5.31995	3.35157	4.66495	6.61123	1.13899	1.34874	1.13324	6.50363	0	1.0578	3.19837	0	3.10316	2.80955	10.8647	4.11698	6.34117	6.93227
FBgn0265937	asRNA:CR44724	ncRNA	2R	0	1.53897	0	0	0.74485	0.39883	2.35212	0	0	1.22755	0	0	0	0	0	0	2.00231	3.23555	0	1.38953	1.7763	0	2.12926	0	2.78771	0.971359	0	1.0212	0	1.67578	2.33247	0	0.569496	0	0	0	6.61359	1.0578	0	2.6905	3.10316	0.56191	1.20719	0	0.704574	1.15538
FBgn0032635	CG15141	protein_coding	2L	0	0	0	0	1.4897	0.39883	0.784039	0	0	0	0.716073	0.944975	0	0	0	1.9623	3.33719	3.23555	5.72981	6.94764	0	0	0	0	0	0	0.88236	1.0212	1.06399	0	0	0.944461	0	0	0	0	1.6534	1.0578	3.19837	0	0	0.56191	1.20719	0	0	0.577689
FBgn0263383	lncRNA:CR43435	ncRNA	3R	0	0	0	0	0	0.39883	0	0	0	0	0	0	0	0	0	0	0	0	0	0	0	0	0	0	0	0	0	0	0	0	0	0	0	0	0	0	0	0	0	0	0	0	0	0	0.704574	0
FBgn0030316	CG11695	protein_coding	X	1.0644	1.53897	4.33674	1.71458	2.23455	3.19064	2.35212	1.35482	1.23639	0.613776	1.43215	1.88995	0	1.21752	0	0	1.33488	1.61777	0	1.38953	0	0	10.6463	1.67718	1.39386	2.91408	2.64708	4.08479	4.25596	1.67578	5.83118	2.83338	1.13899	1.34874	3.39972	0	0	2.11561	1.59918	2.6905	1.55158	3.93337	4.82878	0	2.8183	6.35458
FBgn0036214	CG7264	protein_coding	3L	0	0	0	0	0	0	0	0	0	0	0	0	0	0	0	0	0	0	0	0	0	0	0	0	0	0	0	0	0	1.67578	0	0	0	0	0	0	0	0	0	0	0	0.56191	0	0	0	0
FBgn0052150	meru	protein_coding	3L	0	0	0	0	0	0	0	0	0	0	0	0	0	0	0	0	0	0.808887	0	0	0	0	0	0	0	0	0	0	0	0	0	0	0	0	0	0	0	0	0	0	0	0	0	0	0	0
FBgn0037270	eIF3f1	protein_coding	3R	24.4811	18.4676	20.2381	24.8614	20.1109	23.1321	29.7935	28.4512	42.6555	44.1919	32.2233	36.854	25.8962	37.7431	20.5853	37.2837	24.6952	21.0311	30.941	19.4534	31.0853	34.4477	29.8096	50.3154	37.6341	37.883	48.5298	38.8055	94.6951	93.8438	106.128	88.7794	50.6851	57.3214	61.1949	79.3443	54.5621	40.1966	39.9796	40.3575	47.3232	53.9434	48.2878	32.9359	54.2522	78.5658
FBgn0032586	Tpr2	protein_coding	2L	22.3523	24.6235	17.347	17.1458	88.6371	85.3495	65.0753	79.9345	52.5466	55.2398	42.2483	34.9641	56.1085	68.181	42.7541	45.1329	38.7114	42.871	50.4223	30.5696	21.3157	15.3101	8.51703	10.0631	71.0866	51.482	68.8241	80.6746	35.1117	30.1641	33.8209	34.0006	52.9631	47.2059	47.596	36.4203	33.068	51.8324	43.178	59.191	117.144	5.6191	13.2791	57.6378	55.6613	71.0558
FBgn0015522	olf186-M	protein_coding	2R	1.0644	0	1.44558	0	2.23455	2.39298	0.784039	2.70964	0.618195	0	0	0	0	0	0	0	0.667438	0.808887	2.29192	5.55812	0	1.27584	0	0	4.18157	0.971359	0.88236	0	0	1.67578	3.49871	0	0.569496	1.34874	0	0	1.6534	2.11561	0	0	1.55158	0.56191	1.20719	1.37233	1.40915	2.31076
FBgn0030356	lncRNA:CR32661	ncRNA	X	0	1.53897	0	0	0	0	0	0	0	0	0	0	0	0	0	0	0	0	0	0	0.888152	0	0	0	0	0	0	0	0	0	0	0	0	0	0	0	0	2.11561	0	0	0	0	0	0	0	0
FBgn0031782	WDR79	protein_coding	2L	0	0	0	0	1.4897	1.19649	2.35212	0	0	0.613776	0.716073	0	0	0	0	0	0	0	0	0	0	0	0	0	1.39386	1.94272	0.88236	0	1.06399	0	0	0	0	0	0	0	0	0	0	0	0	0	0	0	0.704574	2.88845
FBgn0035610	Lkr	protein_coding	3L	0	0	0	0	0	0	0	0	0	0	0	0	0	0	0	0	0	0	0	0	0.888152	0	0	1.67718	0	0	0	0	0	0	0	0	0	0	0	0	0	0	0	0	0	0	0	0	0	0
FBti0061781		transposable_element	X	0	0	0	0	0	0	0	0	0.618195	0.613776	0	0	1.07901	0	0	0	0	0	0	0	0	0	0	0	0	0	0	0	0	0	0	0	0	0	0	0	0	0	0	0	0	0	0	0	0	0
FBgn0267471	lncRNA:CR45821	ncRNA	3L	0	0	0	0	0	0	0	0	0	0	0	0	0	0	0	0	0	0	0	0	0	0	0	0	0	0	0	0	0	0	0	0	0	0	0	0	0	0	0	0	0	0	0	0	0	0
FBgn0022709	Adk1	protein_coding	3L	4.25759	21.5456	7.2279	3.42916	0	0	0	0	1.23639	0.613776	0.716073	6.61482	1.07901	2.43504	15.8348	0	413.812	506.363	562.667	477.998	39.0787	19.1376	36.1974	18.449	6.96928	5.82815	2.64708	5.10599	1.06399	3.35157	2.33247	4.72231	0.569496	1.34874	5.66619	0	595.223	592.37	546.921	435.861	21.7221	24.1621	24.1439	20.5849	7.04574	3.46614
FBgn0031638	CG11927	protein_coding	2L	4.25759	15.3897	7.2279	5.14373	6.70365	7.57776	7.05635	9.48375	8.65473	12.8893	20.7661	13.2296	18.3432	14.6102	3.16697	5.8869	5.3395	4.04444	2.29192	0	8.88152	6.3792	6.38777	6.70872	9.75699	5.82815	15.8825	7.14838	7.44793	1.67578	6.99742	10.3891	3.41697	3.37185	0	5.2029	3.3068	3.17341	0	0	6.98212	4.49528	12.0719	8.23397	11.9778	17.3307
FBgn0000117	arm	protein_coding	X	64.9282	87.7212	72.279	75.4414	294.216	304.706	262.653	285.867	204.623	265.151	219.834	225.849	160.773	174.105	169.433	145.21	43.3835	46.1066	24.0652	50.023	101.249	51.0336	59.6192	35.2208	246.712	240.897	213.531	244.066	132.999	127.359	150.445	145.447	129.275	145.664	122.39	128.772	34.7214	56.0636	49.5747	37.667	103.18	70.2388	62.7741	98.8076	290.989	251.295
FBgn0267692	lncRNA:CR46028	ncRNA	3R	0	0	0	0	0	0.39883	0	0	0	0	0	0	0	0	0	0	0	0	0	0	0	0	0	0	0	0	0	0	0	0	0	0	0	0	0	0	0	0	0	0	0	0	0	0	0	0
FBgn0038965	mats	protein_coding	3R	20.2235	30.7794	27.466	28.2905	52.1395	48.2584	43.9062	60.967	17.9277	33.1439	31.5072	21.7344	17.2642	9.74015	4.75045	17.6607	24.6952	20.2222	17.1894	18.0639	28.4209	19.1376	25.5511	18.449	75.2682	79.6514	62.6476	72.505	24.4718	20.1094	27.9897	27.3894	18.2239	10.7899	7.93267	13.0073	21.4942	23.2717	7.99592	24.2145	49.6506	28.6574	50.7021	46.6592	62.7071	73.3666
FBti0059773		transposable_element	3L	0	0	0	0	0	0.39883	0	0	0	0	0	0	1.07901	0	1.58348	0	0.667438	0	0	0	0.888152	0	0	0	0	0	0	0	0	0	1.16624	0.944461	0	0.674369	0	0	0	0	0	2.6905	0	0	0	0	0	0
FBgn0032979	Clamp	protein_coding	2L	2.12879	4.61691	2.89116	5.14373	1.4897	2.39298	3.13616	2.03223	2.47278	1.84133	0.716073	2.83492	0	1.21752	0	0	7.34182	1.61777	0	0	2.66446	2.55168	2.12926	0	0	3.88544	0	1.0212	0	1.67578	2.33247	0.944461	1.13899	0	0	0	0	2.11561	4.79755	0	1.55158	1.68573	2.41439	2.74466	2.11372	1.73307
FBgn0039609	Nepl17	protein_coding	3R	0	0	0	0	0	0	0	0	0	0	0	0	0	0	1.58348	0	20.6906	18.6044	12.6056	33.3487	0	0	0	0	0	0	0	0	0	0	0	0	0	0	0	0	0	9.52024	1.59918	37.667	0	0	0	0	0	0
FBgn0029937	CG8300	protein_coding	X	2.12879	3.07794	7.2279	1.71458	5.21395	9.17308	14.8967	8.12893	4.94556	4.29643	4.29644	4.72487	0	1.21752	3.16697	0	0.667438	0.808887	9.16769	5.55812	0.888152	1.27584	0	1.67718	4.18157	11.6563	14.1178	17.3604	4.25596	1.67578	6.99742	0.944461	1.13899	1.34874	2.26648	1.30073	4.96019	0	4.79755	5.381	5.43054	1.68573	2.41439	2.74466	6.34117	14.4422
FBgn0036839	SmydA-2	protein_coding	3L	3.19319	0	0	0	0.74485	0.39883	3.9202	0.677411	27.8188	38.6679	33.6554	30.2392	18.3432	24.3504	20.5853	27.4722	0	1.61777	0	0	0	0	0	0	1.39386	0	0	4.08479	31.9197	13.4063	43.1508	24.556	30.7528	24.2773	49.8625	23.4131	0	0	0	0	0	0	1.20719	0	0	1.15538
FBgn0259742	CG42360	protein_coding	2R	1.0644	1.53897	0	0.857289	2.23455	1.59532	0.784039	4.74187	1.23639	3.06888	1.43215	1.88995	0	0	0	1.9623	0	0	0	0	0	0	0	0	0	0.971359	0.88236	2.04239	0	0	2.33247	0	0	0	0	0	0	0	0	0	0	2.24764	0	0	0	0.577689
FBgn0003268	rod	protein_coding	3R	0	0	0	0	0	1.19649	0	2.03223	0	0	0	0.944975	0	0	0	0	0	0	0	0	0	1.27584	2.12926	0	0	0	0	0	0	0	1.16624	0	0	0	1.13324	0	0	0	0	0	0	0	0	0	0.704574	0
FBgn0015271	Orc5	protein_coding	2L	0	0	0	0	0	0.39883	0	0	0	0	0	0	0	0	0	0	0.667438	0	0	0	0	0	0	0	0	0.971359	0	0	0	0	0	0	0	0	0	0	0	0	0	0	0	0	0	0	0	0
FBgn0051729	CG31729	protein_coding	2L	42.5759	24.6235	26.0204	31.7197	26.8146	28.7157	25.8733	18.9675	8.65473	7.97908	13.6054	16.0646	22.6592	24.3504	20.5853	15.6984	40.0463	20.2222	25.2111	20.8429	7.10522	5.10336	0	3.35436	0	7.77087	4.4118	11.2332	2.12798	1.67578	1.16624	3.77785	6.26445	4.72059	3.39972	6.50363	28.1078	12.6937	9.5951	5.381	3.87895	9.55248	4.82878	4.11698	4.93202	4.04383
FBgn0260935	Vps15	protein_coding	3R	12.7728	10.7728	7.2279	7.7156	2.9794	3.19064	1.56808	2.70964	0.618195	2.4551	0	3.7799	1.07901	4.87007	3.16697	1.9623	13.3488	14.56	12.6056	15.2848	17.763	14.0342	12.7755	15.0946	6.96928	5.82815	4.4118	3.06359	1.06399	0	2.33247	0.944461	6.83395	4.72059	3.39972	3.90218	24.801	25.3873	14.3927	18.8335	17.8432	11.2382	6.03597	9.6063	0.704574	3.46614
FBgn0062440	EMRE	protein_coding	2R	110.697	38.4742	46.2586	41.1499	16.3867	15.9532	23.5212	19.6449	72.947	63.8327	87.3609	58.5884	124.086	120.534	95.009	145.21	13.3488	14.56	11.4596	13.8953	28.4209	47.2061	46.8437	55.3469	41.8157	20.3985	30.8826	20.4239	43.6236	46.9219	34.9871	48.1675	64.353	88.3424	62.3281	110.562	42.9883	38.081	51.1739	61.8815	17.0674	24.1621	42.2518	15.0956	22.5464	24.263
FBgn0050391	CG30391	protein_coding	2R	0	0	0	0	0	0	0	0	0	0	0	0	0	0	0	0	0	0	0	0	0	0	0	0	0	0	0	0	0	0	0	0	0	0	0	0	0	0	0	0	0	0	0	0	0	0
FBgn0026566	CG1307	protein_coding	3R	4.25759	0	4.33674	0.857289	3.72425	9.57191	3.13616	6.0967	16.6913	12.8893	15.0375	18.8995	10.7901	14.6102	7.91742	21.5853	8.00926	5.66221	4.58384	1.38953	7.10522	7.65504	8.51703	5.03154	11.1508	4.85679	7.94124	5.10599	18.0878	13.4063	19.826	13.2225	13.6679	16.1849	7.93267	7.80435	1.6534	3.17341	6.39673	8.07151	4.65475	6.74292	6.03597	4.11698	8.45489	9.82072
FBgn0030895	CG7135	protein_coding	X	3.19319	1.53897	1.44558	2.57187	0.74485	0	0	0	3.70917	3.06888	5.72858	4.72487	12.9481	23.1328	19.0018	17.6607	0	0.808887	4.58384	0	2.66446	5.10336	2.12926	1.67718	0	0.971359	0	1.0212	3.19197	5.02735	3.49871	5.66677	17.6544	16.8592	14.7321	24.7138	8.26699	1.0578	6.39673	13.4525	0.775791	0.56191	3.62158	1.37233	0.704574	0
FBgn0266700	asRNA:CR45190	ncRNA	3R	2.12879	0	2.89116	0	0	0	0.784039	0	0	0.613776	1.43215	0.944975	1.07901	0	1.58348	1.9623	0.667438	0.808887	0	0	0.888152	0	0	0	0	0	0	1.0212	1.06399	3.35157	1.16624	1.88892	2.84748	1.34874	1.13324	3.90218	0	0	0	0	0	1.12382	2.41439	0	0	0
FBgn0037540	Pbp95	protein_coding	3R	0	0	0	0	0	0.39883	0	0.677411	0	0.613776	0	0	0	0	0	0	0	0.808887	0	0	0	0	2.12926	0	0	0.971359	0	2.04239	0	0	0	0	0	0	0	0	0	0	0	0	0	0	0	0	0	0
FBgn0030799	CG4872	protein_coding	X	0	0	0	0	0	0.39883	0	0	0	0	0	0	0	0	0	0	0	0	0	0	0	0	0	0	1.39386	0	0.88236	0	1.06399	0	0	0.944461	0	0	0	0	0	0	0	0	0	0	0	1.37233	0	0
FBgn0039703	CG7829	protein_coding	3R	0	0	0	0	0	0	0	0	0	0	0	0	0	0	0	0	0	0	0	0	0	0	0	0	0	0	0	0	0	0	0	0	0	0	0	0	0	0	0	0	0	0	0	0	0	0
FBgn0004854	B-H2	protein_coding	X	0	1.53897	0	4.28645	2.23455	9.17308	7.84039	2.70964	0	0	0	0	0	0	0	0	0	0	0	0	0	1.27584	2.12926	0	1.39386	0.971359	0.88236	0	0	0	0	0	0	0	0	0	3.3068	0	0	0	0	0	0	0	0	1.15538
FBgn0050033	CG30033	protein_coding	2R	0	0	0	0	0	0	0	0	0	0	0	0	0	0	0	0	0	0	0	0	0	0	0	0	0	0	0.88236	0	0	0	0	0	0	0	0	0	0	0	0	0	0	0	0	0	0	0
FBti0020069		transposable_element	3L	0	0	0	0	0	0	0	0	0	0	0	0	0	0	0	0	0	0	0	0	0	0	0	0	0	0	0	0	0	1.67578	0	0	0	0	0	0	0	0	0	0	0	0	0	0	0	0
FBgn0024314	Plap	protein_coding	2L	0	10.7728	2.89116	6.00102	3.72425	9.57191	8.62443	7.45152	2.47278	2.4551	2.86429	3.7799	2.15802	1.21752	3.16697	3.9246	10.679	12.9422	12.6056	5.55812	25.7564	7.65504	23.4218	5.03154	15.3324	9.71359	13.2354	11.2332	6.38394	1.67578	2.33247	11.3335	2.27798	4.04622	4.53295	1.30073	13.2272	16.9249	11.1943	2.6905	10.8611	4.49528	2.41439	12.351	15.5006	13.2869
FBgn0039529	CG5612	protein_coding	3R	178.819	275.475	130.102	124.307	4.4691	5.58361	6.27232	1.35482	42.0373	57.0811	47.9769	68.0382	18.3432	13.3927	23.7523	11.7738	0	0	0	0	298.419	243.686	281.062	234.805	1.39386	2.91408	7.05888	12.2544	84.0552	97.1954	59.4781	72.7235	11.9594	18.208	12.4656	1.30073	6.61359	2.11561	0	0	131.884	107.887	124.341	112.531	7.04574	8.66534
FBgn0044871	Gos28	protein_coding	3R	3.19319	7.69484	8.67348	3.42916	6.70365	4.78595	0.784039	2.03223	2.47278	4.91021	0	1.88995	2.15802	1.21752	4.75045	0	4.67207	5.66221	2.29192	1.38953	4.44076	7.65504	6.38777	3.35436	8.36313	5.82815	6.17652	8.16958	3.19197	1.67578	2.33247	7.55569	1.13899	1.34874	3.39972	2.60145	3.3068	4.23122	0	0	6.98212	2.24764	3.62158	4.11698	7.75031	3.46614
FBgn0033757	muskelin	protein_coding	2R	6.38638	4.61691	4.33674	5.14373	8.93819	7.57776	7.05635	8.12893	8.03654	7.36531	7.8768	3.7799	3.23703	4.87007	6.33393	3.9246	4.00463	9.70665	2.29192	6.94764	0.888152	2.55168	0	0	9.75699	4.85679	6.17652	6.12718	2.12798	1.67578	3.49871	1.88892	0.569496	3.37185	2.26648	5.2029	4.96019	9.52024	4.79755	2.6905	1.55158	3.93337	1.20719	15.0956	4.93202	7.50996
FBgn0039674	CG1907	protein_coding	3R	104.311	16.9287	33.2483	30.8624	1.4897	1.99415	2.35212	3.38705	0.618195	0.613776	0.716073	2.83492	24.8172	20.6978	22.1688	31.3968	46.7207	46.9155	37.8167	51.4126	28.4209	40.8269	42.5852	65.41	5.57542	14.5704	5.29416	2.04239	3.19197	6.70313	2.33247	3.77785	41.0037	25.626	32.8639	20.8116	33.068	51.8324	23.9878	64.5721	13.9642	19.6669	36.2158	17.8403	5.63659	9.82072
FBti0018989		transposable_element	2R	1.0644	0	0	0	0.74485	1.19649	0	0	0.618195	0.613776	2.86429	1.88995	2.15802	0	0	1.9623	0	0.808887	0	1.38953	0.888152	0	0	0	0	1.94272	0.88236	2.04239	2.12798	0	0	0.944461	1.13899	0	0	0	6.61359	1.0578	1.59918	2.6905	0	0	0	0	0	0
FBgn0035270	CG13933	protein_coding	3L	15.966	47.708	30.3572	24.0041	6.70365	7.57776	8.62443	8.12893	5.56376	11.048	3.58036	3.7799	7.55307	8.52263	9.5009	7.84919	24.6952	13.7511	10.3137	15.2848	40.855	34.4477	40.4559	31.8664	6.96928	2.91408	4.4118	5.10599	3.19197	1.67578	9.32989	13.2225	12.5289	10.7899	9.06591	11.7065	3.3068	25.3873	15.9918	13.4525	34.1348	82.6008	22.9367	79.595	4.93202	8.66534
FBgn0030562	CG9400	protein_coding	X	0	0	0	0	0	0	0	0	0	0	0	0	0	0	0	0	0	0	1.14596	0	0	0	0	0	0	0	1.76472	0	0	0	0	0	0	0	0	0	0	0	0	0	0	0	0	0	0	0
FBgn0259927	CG42450	protein_coding	X	0	0	0	0	0	0.39883	0	0.677411	1.23639	0	0	2.83492	0	0	0	0	2.00231	0.808887	2.29192	0	0	0	0	0	0	0.971359	0	3.06359	0	0	0	0	0	0	0	0	4.96019	0	0	0	0	0	0	0	0.704574	0
FBgn0032688	CG15160	protein_coding	2L	1.0644	0	1.44558	0	5.9588	9.17308	7.05635	6.77411	5.56376	4.91021	7.8768	3.7799	2.15802	1.21752	0	1.9623	2.66975	3.23555	1.14596	0	0.888152	0	2.12926	0	2.78771	6.79951	4.4118	3.06359	2.12798	0	3.49871	3.77785	0	0.674369	0	1.30073	1.6534	2.11561	0	0	3.10316	3.93337	1.20719	4.11698	4.22744	1.15538
FBgn0011771	Hem	protein_coding	3L	6.38638	12.3118	8.67348	11.1448	29.0491	15.9532	22.7371	20.3223	8.03654	5.52398	5.01251	6.61482	2.15802	3.65256	9.5009	3.9246	7.34182	0	3.43788	5.55812	14.2104	8.93088	2.12926	6.70872	27.8771	15.5417	21.1766	27.5723	8.51192	10.0547	5.83118	10.3891	2.84748	4.04622	5.66619	1.30073	4.96019	5.28902	1.59918	0	6.98212	6.18101	7.24316	2.74466	21.8418	19.0637
FBgn0015320	Ubc2	protein_coding	2L	17.0304	27.7014	14.4558	30.0051	58.0983	61.4197	58.0189	53.5154	19.7822	27.6199	22.9143	19.8445	17.2642	15.8277	7.91742	25.5099	26.6975	40.4444	20.6273	29.1801	35.5261	16.5859	21.2926	16.7718	54.3604	57.3102	55.5887	66.3778	27.6637	26.8125	17.4936	24.556	26.1968	27.6491	38.5301	31.2174	19.8408	23.2717	12.7935	21.524	27.1527	13.4858	22.9367	13.7233	57.7751	77.4104
FBgn0034002	CG8079	protein_coding	2R	1.0644	0	0	0	0.74485	1.19649	1.56808	1.35482	0.618195	0.613776	0	0	0	0	0	0	0.667438	1.61777	0	0	0	1.27584	0	0	1.39386	0	0	1.0212	1.06399	1.67578	3.49871	0	1.13899	0.674369	0	0	0	1.0578	0	0	0	0	0	0	0.704574	0
FBgn0083977	CG34141	protein_coding	2R	13.8372	13.8507	11.5646	27.4332	0	0.797659	0.784039	0	16.6913	18.4133	18.6179	31.1842	127.323	153.407	147.264	137.361	1.33488	2.42666	4.58384	4.16859	11.546	14.0342	14.9048	15.0946	0	3.88544	0	0	22.3438	28.4883	17.4936	34.9451	142.943	131.502	123.523	146.982	8.26699	1.0578	3.19837	8.07151	23.2737	40.4575	31.387	34.3082	0	0.577689
FBgn0034740	nsr	protein_coding	2R	0	0	0	0	0	0	0	0	0	0	0	0	0	0	0	0	0	0	0	0	0	0	0	0	0	0	0	0	0	0	0	0	0	0	1.13324	0	0	0	0	0	0	0	0	0	0	0
FBgn0051522	CG31522	protein_coding	3R	4.25759	7.69484	8.67348	24.0041	0	1.19649	0.784039	1.35482	7.41834	6.75153	7.8768	8.50477	21.5802	7.30511	17.4183	19.623	31.3696	28.3111	9.16769	13.8953	5.32891	15.3101	17.0341	6.70872	4.18157	0	1.76472	1.0212	8.51192	11.7305	11.6624	6.61123	9.68142	14.8361	7.93267	0	16.534	17.9827	17.591	26.905	2.32737	10.6763	9.65755	1.37233	0	1.15538
FBgn0011872	tRNA:Gly-GCC-1-13	tRNA	2R	0	0	0	0	0	0	0	0	0	0	0	0	0	0	0	0	0	0	0	0	0	0	0	0	0	0	0	0	1.06399	0	0	0	0	0	0	0	0	0	0	0	0	0	0	0	0	0
FBgn0283535	Vha26	protein_coding	3R	90.4738	78.4874	96.8539	91.7299	29.794	31.1087	32.9297	24.3868	24.7278	37.4403	32.2233	26.4593	76.6097	79.1387	58.5889	51.0198	44.7183	59.0488	56.1521	56.9707	43.5195	54.8611	42.5852	48.6382	18.1201	28.1694	24.7061	24.5087	17.0238	33.5157	22.1585	25.5005	47.8376	53.9495	48.7292	23.4131	21.4942	13.7515	25.5869	18.8335	28.7043	47.2005	48.2878	24.7019	22.5464	27.7291
FBgn0031312	Tango14	protein_coding	2L	0	1.53897	1.44558	0.857289	4.4691	3.9883	4.70424	3.38705	1.85459	3.68265	2.86429	2.83492	2.15802	1.21752	1.58348	0	8.67669	6.4711	3.43788	5.55812	2.66446	1.27584	0	0	4.18157	8.74223	5.29416	7.14838	1.06399	3.35157	4.66495	8.50015	5.69496	2.69748	2.26648	3.90218	8.26699	9.52024	4.79755	2.6905	0.775791	1.12382	2.41439	0	16.2052	11.5538
FBgn0023083	fray	protein_coding	3R	29.8031	38.4742	34.6939	48.8655	37.9873	34.2993	40.7701	34.5479	33.3825	37.4403	40.8162	42.5239	28.0543	34.0905	30.0862	29.4345	15.3511	21.84	20.6273	19.4534	24.8683	17.8618	21.2926	13.4174	22.3017	16.5131	27.3532	27.5723	21.2798	33.5157	29.1559	21.7226	15.3764	15.5105	9.06591	9.10508	29.7612	13.7515	27.1861	13.4525	12.4127	14.0478	15.6935	17.8403	23.9555	21.3745
FBgn0032517	CG7099	protein_coding	2L	0	0	0	0	0	0.797659	0	0	0	0	0.716073	0	0	0	0	0	0	0.808887	0	0	0	0	0	0	0	0	0	0	0	0	0	0	0	0	0	0	0	0	0	0	0	0	0	0	0	1.15538
FBgn0037902	CG5281	protein_coding	3R	4.25759	9.23381	10.1191	9.43018	0	0	0	0.677411	1.23639	1.84133	2.14822	1.88995	0	1.21752	3.16697	0	0	0	6.87577	2.77906	11.546	12.7584	8.51703	5.03154	0	0.971359	0.88236	0	1.06399	5.02735	2.33247	0.944461	2.27798	2.69748	3.39972	3.90218	1.6534	0	3.19837	0	6.20633	14.0478	12.0719	10.9786	0.704574	1.73307
FBgn0267792	rgr	protein_coding	2R	39.3827	4.61691	50.5953	39.4353	1.4897	2.79181	0.784039	2.03223	0.618195	0	0	0.944975	4.31604	2.43504	3.16697	5.8869	6.00694	4.85332	3.43788	4.16859	10.6578	70.1712	83.0411	159.332	2.78771	3.88544	3.52944	5.10599	1.06399	0	3.49871	0	1.13899	5.39495	1.13324	1.30073	11.5738	4.23122	4.79755	2.6905	6.20633	107.887	49.4949	9.6063	3.52287	1.15538
FBgn0051133	Slimp	protein_coding	3R	0	0	0	0.857289	0	0.797659	0	0.677411	2.47278	5.52398	3.58036	0.944975	3.23703	0	1.58348	0	0	3.23555	0	0	0.888152	2.55168	0	0	0	0	0.88236	0	4.25596	1.67578	3.49871	5.66677	2.84748	0.674369	2.26648	0	0	0	0	0	0.775791	1.12382	1.20719	0	0	1.73307
FBgn0037040	CG12983	protein_coding	3L	0	0	0	0	0	0	0	0.677411	0	0	0	0	0	0	0	0	0	0	0	0	0	0	0	0	0	0	0	0	0	0	0	0	0	0	0	0	0	0	0	0	0	0	0	0	0	0
FBgn0015031	cype	protein_coding	2L	526.877	180.059	294.898	156.884	31.2837	29.9122	36.8499	27.0964	118.693	101.273	110.275	127.572	247.093	310.467	250.19	319.855	134.822	143.173	265.863	204.261	115.46	244.961	129.885	258.286	41.8157	31.0835	26.4708	28.5935	81.9273	70.3829	80.4703	80.2792	181.1	261.655	196.05	314.776	67.7893	108.954	159.918	164.121	83.0096	119.125	204.016	72.7334	49.3202	38.7052
FBgn0034894	sigmar	protein_coding	2R	7.45078	32.3183	13.0102	1.71458	20.1109	12.7625	26.6573	19.6449	8.03654	4.29643	8.59287	7.5598	6.47406	1.21752	9.5009	9.81149	16.0185	10.5155	5.72981	4.16859	9.76967	1.27584	2.12926	3.35436	25.0894	29.1408	27.3532	34.7207	5.31995	1.67578	9.32989	1.88892	7.97294	0	5.66619	2.60145	14.8806	27.5029	9.5951	8.07151	13.9642	2.80955	0	15.0956	26.0692	36.3944
FBti0019218		transposable_element	2L	0	0	0	0	0	0	0	0	0	0	0.716073	0	0	0	0	0	0	0	0	0	0	0	0	1.67718	0	0	0.88236	0	1.06399	0	0	0	0.569496	0	0	0	1.6534	0	0	0	0	0	0	0	0	0
FBgn0000633	CG17716	protein_coding	2R	0	0	0	0	0	0	0	0	3.09098	0	2.86429	0	0	0	0	0	0.667438	0	0	0	0	0	0	0	2.78771	0	2.64708	0	2.12798	1.67578	1.16624	1.88892	0	0	0	0	0	1.0578	0	0	0	0	0	1.37233	0	0
FBgn0015376	cutlet	protein_coding	2L	0	4.61691	1.44558	0	0.74485	0.39883	2.35212	0.677411	1.23639	0.613776	0	0	0	0	0	3.9246	3.33719	1.61777	2.29192	1.38953	0.888152	0	0	0	2.78771	1.94272	1.76472	2.04239	3.19197	0	1.16624	0	0.569496	0	0	0	0	0	0	0	2.32737	2.24764	2.41439	8.23397	3.52287	4.04383
FBgn0033350	CG8237	protein_coding	2R	0	1.53897	7.2279	1.71458	4.4691	2.79181	1.56808	1.35482	3.70917	3.68265	2.86429	2.83492	1.07901	2.43504	0	0	1.33488	2.42666	2.29192	2.77906	1.7763	2.55168	2.12926	0	9.75699	5.82815	3.52944	3.06359	3.19197	1.67578	6.99742	0.944461	3.98647	4.04622	1.13324	0	0	3.17341	0	5.381	3.10316	3.93337	2.41439	1.37233	6.34117	3.46614
FBgn0033954	CG12860	protein_coding	2R	0	0	0	0	0	0	0	0	0	0	0	0	0	0	0	0	0	0	0	0	0	0	2.12926	0	0	0	0	0	0	0	0	0	0	0	0	0	0	0	0	0	0	0	0	0	0	0
FBgn0037395	CG10280	protein_coding	3R	0	0	0	0	0	0	0	0	0	0	0	0	0	0	0	1.9623	0	0	0	0	0	0	0	0	0	0	0	0	0	0	0	0	0.569496	0.674369	0	1.30073	0	0	0	0	0	0	0	0	0	0
FBgn0014877	Roe1	protein_coding	2R	3.19319	1.53897	2.89116	1.71458	2.9794	2.79181	2.35212	4.06446	17.9277	11.048	18.6179	14.1746	29.1333	31.6555	23.7523	31.3968	6.00694	8.08887	3.43788	9.7267	3.55261	3.82752	0	1.67718	4.18157	0.971359	3.52944	2.04239	5.31995	20.1094	9.32989	17.0003	23.3493	25.626	18.1318	9.10508	1.6534	1.0578	6.39673	13.4525	3.10316	1.68573	3.62158	1.37233	0.704574	2.88845
FBgn0262843	CG43207	protein_coding	2R	0	0	0	0	0	0	0	0	0	0	0	0	0	0	0	0	0	0	0	0	0	0	0	0	0	0	0	0	0	0	0	0	0	0	0	0	0	0	0	0	0	0	0	0	0	0
FBgn0032699	CG10383	protein_coding	2L	1.0644	1.53897	5.78232	3.42916	14.897	13.5602	12.5446	9.48375	7.41834	7.97908	6.44466	8.50477	2.15802	3.65256	1.58348	0	124.143	79.271	37.8167	73.645	0	5.10336	2.12926	0	5.57542	17.4845	18.5296	6.12718	2.12798	0	0	4.72231	4.55596	3.37185	6.79943	6.50363	124.005	138.572	63.9673	75.3341	6.20633	3.93337	3.62158	9.6063	28.183	12.1315
FBgn0027490	D12	protein_coding	2L	0	0	0	0	2.9794	2.39298	3.13616	0.677411	3.09098	3.06888	2.86429	2.83492	0	1.21752	1.58348	3.9246	0.667438	0	1.14596	1.38953	0	0	2.12926	0	2.78771	1.94272	1.76472	2.04239	2.12798	1.67578	2.33247	2.83338	0.569496	0.674369	2.26648	1.30073	0	0	0	2.6905	2.32737	1.12382	0	0	3.52287	3.46614
FBgn0030400	Pits	protein_coding	X	14.9016	7.69484	21.6837	9.43018	17.8764	25.9239	23.5212	25.7416	52.5466	55.8536	42.2483	41.5789	16.1852	14.6102	15.8348	11.7738	12.0139	11.3244	4.58384	11.1162	11.546	12.7584	6.38777	13.4174	11.1508	15.5417	29.1179	22.4663	45.7516	33.5157	44.317	31.1672	15.3764	21.5798	20.3983	22.1123	6.61359	13.7515	7.99592	2.6905	10.8611	12.362	4.82878	10.9786	18.3189	21.3745
FBgn0030864	CG8173	protein_coding	X	0	0	0	0	2.23455	1.99415	1.56808	3.38705	0.618195	1.22755	0	0	0	0	0	3.9246	0	0	0	0	0	0	0	0	4.18157	0	2.64708	0	1.06399	1.67578	0	1.88892	0	0	0	0	0	0	0	0	2.32737	0	3.62158	0	0.704574	0.577689
FBgn0033551	CG7222	protein_coding	2R	3.19319	13.8507	4.33674	6.00102	13.4073	17.1497	10.1925	14.2256	6.18195	9.82041	9.30895	6.61482	4.31604	2.43504	1.58348	1.9623	9.34413	12.1333	6.87577	6.94764	4.44076	1.27584	4.25852	0	12.5447	9.71359	11.4707	8.16958	9.57591	10.0547	5.83118	11.3335	6.83395	3.37185	1.13324	3.90218	6.61359	3.17341	9.5951	10.762	9.30949	8.42866	8.45036	4.11698	9.86404	6.93227
FBti0020243		transposable_element	3L	0	0	0	0	0	0	0	0	0	0	0	0	0	0	0	0	0	0	0	0	0	0	0	0	0	0	0	0	0	0	0	0	0	0	0	0	0	0	0	0	0	0.56191	0	0	0	0
FBgn0027564	CG3149	protein_coding	X	1.0644	3.07794	1.44558	0	0	0.39883	0	0.677411	0	0.613776	1.43215	1.88995	0	0	1.58348	0	0.667438	0.808887	0	0	0.888152	0	2.12926	0	1.39386	0.971359	0	1.0212	2.12798	0	1.16624	1.88892	0	0	0	0	0	0	1.59918	0	1.55158	1.12382	0	0	0	1.15538
FBgn0039196	CG17781	protein_coding	3R	0	0	0	0	0	0	0	0	0	0	0	0	0	0	0	0	0	0	0	0	0	0	0	0	0	0	0	0	0	0	0	0	0.569496	0	0	0	0	0	0	0	0	0	0	0	0	0
FBgn0004107	Cdk2	protein_coding	3R	0	0	0	0.857289	2.9794	1.59532	3.9202	0	0	0	0	0	0	0	0	0	2.66975	1.61777	0	1.38953	0	1.27584	2.12926	0	4.18157	0	1.76472	1.0212	0	0	0	0	1.13899	0	0	0	0	0	0	0	0	0	0	0	0.704574	0
FBti0063150		transposable_element	3R	0	0	0	0	0	0	0	0	0	0	0	0	2.15802	0	0	0	0	0	0	0	0	0	0	0	0	0	0	0	0	0	0	0	0.569496	0	0	0	0	0	0	0	0	0.56191	0	0	1.40915	0
FBgn0035140	BORCS6	protein_coding	3L	1.0644	1.53897	1.44558	0.857289	2.23455	0.39883	0.784039	1.35482	1.23639	0.613776	0	0	0	1.21752	0	0	1.33488	0.808887	0	2.77906	2.66446	2.55168	0	0	1.39386	1.94272	0.88236	1.0212	2.12798	1.67578	0	1.88892	0.569496	0.674369	0	0	1.6534	0	1.59918	2.6905	0	0	1.20719	0	0.704574	2.31076
FBgn0250823	gish	protein_coding	3R	20.2235	26.1625	28.9116	18.0031	102.044	111.672	105.061	99.5794	72.947	105.569	78.768	73.708	101.427	97.4015	107.677	70.6427	18.0208	38.8266	28.649	20.8429	12.4341	11.4826	19.1633	20.1262	37.6341	37.883	41.4709	47.9963	31.9197	82.1133	41.9845	33.0561	47.2681	55.2983	57.7952	23.4131	4.96019	9.52024	14.3927	21.524	14.74	13.4858	14.4863	12.351	45.7973	50.259
FBgn0040805	CG12355	protein_coding	3L	0	0	0	0	0	0	0	0	0	0	0	0	0	0	0	0	0.667438	0	0	0	0	0	0	0	0	0	0	0	0	0	0	0	0	0	0	0	0	0	0	0	0	0	0	0	0	0
FBgn0052638	CG32638	protein_coding	X	3.19319	0	2.89116	6.00102	4.4691	5.98244	6.27232	5.41929	8.65473	6.13776	2.86429	1.88995	15.1061	18.2628	7.91742	17.6607	2.66975	1.61777	6.87577	4.16859	0.888152	1.27584	0	1.67718	2.78771	4.85679	4.4118	6.12718	9.57591	5.02735	12.8286	10.3891	25.0578	28.9979	35.1304	29.9167	6.61359	6.34683	6.39673	5.381	2.32737	5.05719	8.45036	0	2.11372	2.88845
FBgn0030554	CG1434	protein_coding	X	0	4.61691	1.44558	0	0.74485	1.19649	0.784039	1.35482	3.09098	4.29643	1.43215	2.83492	2.15802	1.21752	3.16697	3.9246	0.667438	0	0	1.38953	0	1.27584	4.25852	1.67718	0	2.91408	0	1.0212	0	1.67578	0	1.88892	2.27798	0.674369	0	1.30073	1.6534	0	1.59918	0	0.775791	1.12382	0	2.74466	2.8183	0.577689
FBti0020192		transposable_element	3L	0	0	0	0	0	0	0	0	0	0	0	0	0	0	0	0	0	0	0	0	0	0	0	0	0	0	0	0	0	1.67578	0	0	0	0	0	0	0	0	0	0	0	0	0	0	0	0
FBgn0026196	nop5	protein_coding	2L	2.12879	0	1.44558	0.857289	1.4897	1.99415	5.48828	4.06446	55.0194	61.3776	64.4466	45.3588	15.1061	8.52263	12.6679	19.623	0	3.23555	3.43788	8.33717	1.7763	1.27584	2.12926	1.67718	0	0.971359	1.76472	4.08479	74.4793	65.3555	65.3093	87.8349	6.26445	8.7668	6.79943	6.50363	1.6534	4.23122	0	0	3.10316	2.24764	3.62158	1.37233	4.22744	2.31076
FBgn0037950	HisCl1	protein_coding	3R	0	0	0	0	0	0	0	0	0	0	0	0	0	0	0	0	0	0	0	0	0	0	0	0	0	0	0	0	0	0	0	0	0	0	0	0	0	0	0	0	0	0	0	0	0	0
FBgn0004197	Ser	protein_coding	3R	0	0	0	0	0.74485	0.39883	0.784039	2.70964	0	0	0	0	0	0	0	0	0	0	0	0	0.888152	0	0	0	1.39386	0	0	1.0212	0	0	0	0	0	0	0	0	0	0	0	0	0	0	0	0	0	0.577689
FBgn0001079	fu	protein_coding	X	3.19319	0	5.78232	3.42916	8.93819	8.37542	8.62443	12.1934	3.70917	2.4551	1.43215	0.944975	2.15802	0	1.58348	0	1.33488	0.808887	0	2.77906	0.888152	1.27584	2.12926	3.35436	6.96928	0.971359	1.76472	4.08479	2.12798	5.02735	2.33247	0.944461	1.70849	0.674369	1.13324	1.30073	3.3068	1.0578	3.19837	0	1.55158	0	0	0	2.11372	4.04383
FBgn0284253	LeuRS	protein_coding	2L	1.0644	1.53897	4.33674	0.857289	6.70365	10.3696	5.48828	10.8386	32.7644	26.3924	19.334	26.4593	14.0271	9.74015	17.4183	19.623	2.00231	0.808887	4.58384	8.33717	1.7763	5.10336	0	6.70872	5.57542	17.4845	11.4707	10.212	25.5358	28.4883	26.8234	32.1117	17.0849	25.626	30.5974	19.5109	0	2.11561	0	8.07151	3.87895	5.6191	3.62158	1.37233	6.34117	13.8645
FBgn0032161	CG4594	protein_coding	2L	5.32199	1.53897	5.78232	1.71458	2.9794	0.39883	0.784039	0.677411	1.85459	2.4551	1.43215	8.50477	2.15802	3.65256	3.16697	0	0.667438	0	0	0	0.888152	2.55168	2.12926	1.67718	0	0	0	0	4.25596	0	1.16624	5.66677	2.27798	7.41806	2.26648	2.60145	0	0	0	0	2.32737	1.68573	7.24316	1.37233	0	0
FBgn0262114	RanBPM	protein_coding	2R	42.5759	144.663	89.626	86.5862	75.9747	78.9682	93.3007	93.4827	23.4914	29.4612	30.7911	19.8445	25.8962	23.1328	25.3357	17.6607	104.788	88.9776	66.4657	76.4241	138.552	53.5853	93.6873	70.4415	61.3296	57.3102	76.7653	93.9502	32.9837	35.1914	26.8234	23.6115	28.4748	36.4159	21.5315	24.7138	69.4427	75.1041	75.1616	53.81	103.18	112.382	55.5309	113.903	45.7973	85.498
FBgn0036391	CG17364	protein_coding	3L	0	0	0	0	0	0	0	0	0	0	0	0	0	0	0	0	0	0	0	0	0	0	0	0	0	0	0	0	0	0	0	0.944461	0	0	0	0	0	0	0	0	0	0	0	0	0	0
FBgn0037714	CG9396	protein_coding	3R	0	0	0	0	0	0	0.784039	0	0	0	0	0	0	0	0	0	14.0162	16.1777	13.7515	16.6743	0	0	0	0	1.39386	0	0	0	0	0	0	0	0	0.674369	0	0	0	2.11561	0	10.762	0	0	0	0	0	0
FBgn0039237	CG13640	protein_coding	3R	0	0	0	0	0.74485	0	0.784039	0.677411	0	0	0	0	1.07901	0	1.58348	0	0	0.808887	2.29192	0	0	0	0	0	6.96928	5.82815	0.88236	1.0212	0	0	0	0	0	0	0	0	0	0	0	0	0	0	0	1.37233	3.52287	9.82072
FBgn0035955	CG5194	protein_coding	3L	0	0	0	0	0	0	0	0	0	0	0	0.944975	0	0	0	0	0	0	0	0	0	0	0	0	0	0	0	0	0	1.67578	0	0.944461	1.13899	0	0	0	0	0	0	0	0	0	0	0	2.11372	2.88845
RR48301_transposable_element		transposable_element	3R	0	0	0	0	0	0	0	0	0	0	0	0	0	0	0	0	0	0	0	0	0	0	0	0	0	0	0	0	0	0	0	0	0	0	0	0	0	0	0	0	0	0	0	0	0	0
FBgn0030286	Gapvd1	protein_coding	X	1.0644	0	2.89116	1.71458	1.4897	1.59532	0	1.35482	0	0.613776	0.716073	1.88995	2.15802	3.65256	1.58348	0	6.67438	7.27999	6.87577	9.7267	1.7763	5.10336	0	5.03154	4.18157	4.85679	0	2.04239	1.06399	0	0	3.77785	11.3899	11.4643	12.4656	24.7138	8.26699	7.40463	4.79755	5.381	0.775791	2.80955	1.20719	0	2.11372	1.73307
FBgn0260477	CG30283	protein_coding	2R	0	0	0	0	0	0.39883	0	0	0	0	0	0	0	0	0	0	0	0	0	0	0	0	0	0	0	0.971359	0	0	0	0	0	0	0	0	0	0	0	1.0578	0	0	0	0	0	0	0	0
FBgn0283437	PPO1	protein_coding	2R	2.12879	0	37.5851	0.857289	0	0	0	0	0	0	0	0	0	0	0	0	0	0	0	0	0	1.27584	0	0	0	0	0	0	1.06399	0	29.1559	9.44461	3.41697	0.674369	0	0	0	0	0	0	0	0.56191	1.20719	4.11698	0	0
FBgn0000709	fliI	protein_coding	X	3.19319	9.23381	5.78232	2.57187	6.70365	3.58947	3.9202	4.06446	3.70917	6.13776	6.44466	6.61482	3.23703	3.65256	6.33393	1.9623	1.33488	2.42666	2.29192	4.16859	1.7763	1.27584	4.25852	0	5.57542	2.91408	0	2.04239	4.25596	0	5.83118	4.72231	4.55596	1.34874	2.26648	6.50363	1.6534	1.0578	3.19837	5.381	3.10316	5.05719	0	1.37233	2.11372	4.62152
FBgn0033729	Cpr49Af	protein_coding	2R	212.879	7.69484	14.4558	13.7166	0	0	0	0	0	0	0	0	0	0	0	0	0	0	0	0	7.99337	44.6544	19.1633	46.961	0	0	0	0	0	0	0	0	0	0	0	0	0	0	0	0	1.55158	1.68573	9.65755	1.37233	0	0
FBgn0267537	lncRNA:CR45877	ncRNA	3L	0	0	0	0	0	0	0	0	0	0	0	0	0	0	0	0	0	0	0	0	0	0	0	0	0	0	0	0	0	0	0	0	0	0	0	0	0	0	0	0	0	0	0	0	0	0
FBgn0031189	CG14618	protein_coding	X	1.0644	0	0	0	0	0	0.784039	0	0.618195	0	0	0.944975	0	0	0	0	0	0.808887	0	0	0	0	0	0	0	0.971359	0	0	0	0	1.16624	0	1.13899	0.674369	1.13324	0	0	0	0	0	0	0	0	0	0.704574	0.577689
FBti0020270		transposable_element	3L	0	0	0	0	0	0	0	0	0	0	0	0	0	0	0	0	0	0	0	0	0	0	0	0	0	0	0	0	0	0	0	0	0	0	0	0	0	0	0	0	0	0	0	0	0	0
FBgn0263998	Ack-like	protein_coding	2R	17.0304	30.7794	21.6837	10.2875	55.8637	58.2291	76.8359	63.6766	14.8367	11.6617	19.334	10.3947	6.47406	3.65256	4.75045	5.8869	4.67207	5.66221	3.43788	2.77906	35.5261	14.0342	21.2926	16.7718	57.1481	60.2243	60.0005	61.2718	14.8959	11.7305	9.32989	9.44461	3.98647	2.02311	3.39972	7.80435	4.96019	3.17341	1.59918	2.6905	32.5832	10.1144	14.4863	24.7019	56.3659	53.7251
FBgn0053505	U3-55K	protein_coding	2R	0	0	0	0	0	1.19649	0.784039	1.35482	8.03654	7.97908	7.16073	4.72487	2.15802	0	0	3.9246	0	0	0	2.77906	0	0	0	0	0	1.94272	1.76472	3.06359	17.0238	8.37891	6.99742	15.1114	1.70849	1.34874	3.39972	0	0	0	0	0	0.775791	0	0	0	2.8183	2.88845
FBgn0032799	CG10166	protein_coding	2L	1.0644	1.53897	0	0.857289	5.9588	1.59532	3.13616	5.41929	2.47278	2.4551	1.43215	4.72487	1.07901	2.43504	1.58348	0	4.00463	3.23555	0	6.94764	0.888152	3.82752	0	1.67718	6.96928	6.79951	7.05888	8.16958	1.06399	3.35157	6.99742	2.83338	2.27798	2.02311	0	0	0	0	0	0	2.32737	0.56191	0	5.48931	10.5686	5.1992
FBgn0262730	dtn	protein_coding	X	3.19319	6.15588	2.89116	0.857289	13.4073	22.7333	21.9531	28.4512	30.2916	34.3714	21.4822	17.9545	20.5012	18.2628	12.6679	17.6607	1.33488	8.08887	3.43788	4.16859	6.21706	0	6.38777	0	8.36313	18.4558	18.5296	18.3816	20.2158	23.461	18.6598	16.0558	15.3764	9.44117	7.93267	6.50363	1.6534	1.0578	9.5951	0	6.98212	3.93337	2.41439	4.11698	15.5006	17.9084
FBti0018861		transposable_element	2R	0	0	0	0	0	0	0	0	0	0	0	0	0	0	0	0	0	1.61777	0	0	0	0	0	0	0	0	0	0	0	0	0	0	0	0	0	0	0	0	0	0	0	0	0	0	0	0
FBgn0037844	CG4570	protein_coding	3R	2.12879	0	0	0	0	0.797659	2.35212	0	1.85459	0	4.29644	0	3.23703	0	1.58348	0	0.667438	0.808887	0	1.38953	0	0	0	0	1.39386	0	0	0	3.19197	1.67578	2.33247	0.944461	0	0	1.13324	0	0	0	0	2.6905	0.775791	0	0	0	0	0
FBgn0028648	mRpL50	protein_coding	3L	0	0	0	0.857289	2.23455	1.99415	4.70424	0.677411	15.4549	12.8893	10.7411	17.9545	35.6073	25.5679	39.5871	31.3968	2.00231	0.808887	0	1.38953	2.66446	1.27584	0	1.67718	2.78771	1.94272	6.17652	3.06359	13.8319	11.7305	8.16366	11.3335	14.8069	12.1386	19.2651	9.10508	1.6534	1.0578	3.19837	0	0	1.12382	2.41439	1.37233	7.75031	6.35458
FBti0062632		transposable_element	4	0	0	0	0	0	0	0	0	0	0	0	0	0	0	0	0	0	0	0	0	0	0	0	0	0	0	0	1.0212	0	0	0	0	0	0	0	0	0	0	0	0	0	0	0	0	0	0
FBti0019057		transposable_element	X	1.0644	0	0	0.857289	0	0	0	0	0	0	0	0	3.23703	2.43504	0	0	0	0	0	0	0	0	0	0	0	0	0.88236	0	0	0	0	0	2.84748	1.34874	0	0	0	0	0	0	0	0	0	0	0	0
FBgn0035529	Fdx2	protein_coding	3L	4.25759	6.15588	4.33674	4.28645	3.72425	0.797659	2.35212	4.06446	7.41834	3.68265	5.72858	3.7799	17.2642	21.9153	28.5027	17.6607	24.6952	25.8844	13.7515	15.2848	1.7763	5.10336	8.51703	1.67718	4.18157	3.88544	2.64708	4.08479	3.19197	0	2.33247	16.0558	14.2374	19.5567	7.93267	18.2102	14.8806	19.0405	6.39673	37.667	5.43054	3.93337	4.82878	5.48931	4.22744	2.31076
FBgn0267022	asRNA:CR45466	ncRNA	X	0	0	0	0	0	0	0	0	0	0	0	0	0	0	0	0	0	0	0	0	0	0	0	0	0	0	0	0	0	0	0	0	0	0	0	0	0	0	0	0	0	0	0	0	0	0
FBgn0267199	lncRNA:CR45639	ncRNA	3R	0	0	0	0	0	0.39883	0	0.677411	0	0	0	0	0	0	0	0	0	0	0	0	0	0	0	0	0	0	0	0	0	0	0	0	0	0	0	0	0	0	0	0	0	0	0	0	0	0
FBgn0052311	zormin	protein_coding	3L	573.71	1640.54	930.953	878.721	66.2916	51.0502	65.8593	38.6124	836.418	831.052	652.342	833.468	1685.41	2118.48	1854.26	1613.01	78.0902	143.173	169.602	101.436	1257.62	871.399	1260.52	707.77	57.1481	42.7398	19.4119	42.8903	414.956	340.184	353.37	415.563	1326.92	1661.65	1627.33	1657.12	107.471	121.648	155.121	193.716	1304.1	1268.23	1410	1528.77	61.2979	35.8167
FBti0063975		transposable_element	4	0	0	0	0	0	0.39883	0	0.677411	0	1.22755	0	0	0	0	0	3.9246	0	0	0	0	0	0	0	1.67718	0	0	0	0	1.06399	0	0	0	0.569496	0	2.26648	0	0	1.0578	0	0	0	0	0	0	0	0
FBgn0266593	lncRNA:CR45118	ncRNA	3L	0	0	0	0	0	0	0	0	0	0	0	0	0	0	0	0	0	0	0	0	0	1.27584	0	0	0	0	0	0	0	0	0	0	0	0	0	0	0	0	0	0	0	0	0	0	0	0
FBgn0261787	brun	protein_coding	2L	8.51518	46.1691	11.5646	20.5749	8.93819	7.97659	10.1925	4.74187	4.32737	2.4551	7.8768	6.61482	6.47406	6.08759	6.33393	7.84919	16.6859	23.4577	19.4813	26.401	33.7498	5.10336	14.9048	3.35436	8.36313	11.6563	14.1178	17.3604	3.19197	1.67578	5.83118	2.83338	3.41697	2.02311	1.13324	2.60145	13.2272	11.6358	9.5951	10.762	72.1486	15.7335	7.24316	42.5422	20.4326	17.3307
FBgn0034219	mthl4	protein_coding	2R	4.25759	1.53897	5.78232	5.14373	2.23455	1.59532	3.13616	2.70964	3.70917	2.4551	2.14822	1.88995	2.15802	4.87007	0	7.84919	0	0.808887	4.58384	0	4.44076	3.82752	2.12926	8.3859	1.39386	0	2.64708	3.06359	1.06399	0	1.16624	1.88892	2.27798	2.69748	3.39972	3.90218	1.6534	0	4.79755	0	3.87895	8.99057	9.65755	1.37233	2.11372	1.15538
FBgn0037883	CG14701	protein_coding	3R	0	0	0	0	0	0	0	0	0	0.613776	0	0	0	0	0	0	0	0	0	0	0	0	0	0	0	0	0	0	0	0	0	0	0	0	0	0	0	0	0	0	0	0	0	0	0	0
FBgn0039877	Mccc1	protein_coding	3R	9.57958	4.61691	4.33674	2.57187	13.4073	6.7801	7.05635	11.516	16.0731	30.6888	30.7911	19.8445	14.0271	8.52263	7.91742	25.5099	8.67669	6.4711	8.02173	6.94764	2.66446	11.4826	4.25852	8.3859	6.96928	5.82815	11.4707	10.212	26.5998	36.8672	37.3196	35.8895	13.6679	16.1849	20.3983	9.10508	3.3068	11.6358	6.39673	13.4525	0.775791	2.80955	2.41439	2.74466	7.04574	10.9761
FBgn0086856	CG11555	protein_coding	2L	0	0	1.44558	0	0.74485	0.797659	1.56808	0.677411	1.23639	0.613776	1.43215	2.83492	1.07901	2.43504	3.16697	0	0.667438	0	0	2.77906	0	1.27584	0	0	0	0	0.88236	2.04239	1.06399	5.02735	4.66495	3.77785	1.13899	3.37185	0	1.30073	0	0	0	0	0	0	0	0	0	0
FBgn0262782	Mdh1	protein_coding	2L	257.584	95.4161	151.786	108.876	7.4485	3.19064	7.05635	2.70964	22.8732	25.1648	26.4947	31.1842	56.1085	60.8759	49.088	76.5296	49.3904	59.0488	66.4657	61.1393	115.46	234.755	200.15	348.853	2.78771	11.6563	11.4707	8.16958	32.9837	40.2188	66.4755	73.668	85.9938	75.5294	60.0616	104.058	11.5738	33.8497	12.7935	51.1195	152.055	259.041	472.013	115.276	12.6823	15.5976
FBti0020025		transposable_element	3L	0	0	0	0	0	0	0	0	0	0	0	0	0	0	0	0	0	0	0	0	0	0	2.12926	0	0	0	0	0	0	0	0	0	0	0	0	0	0	0	0	0	0	0	0	1.37233	0	0
FBgn0038206	twf	protein_coding	3R	4.25759	1.53897	1.44558	1.71458	2.9794	0.797659	0.784039	1.35482	0	0.613776	0	0.944975	0	0	1.58348	0	0	0	0	1.38953	1.7763	0	0	1.67718	1.39386	0	0	2.04239	1.06399	1.67578	0	0.944461	0.569496	0	0	1.30073	3.3068	0	0	5.381	0	0.56191	0	0	0	0
FBgn0052075	CG32075	protein_coding	3L	1.0644	0	0	0	0.74485	0.797659	1.56808	0	1.85459	3.06888	5.01251	3.7799	0	1.21752	0	0	0	0.808887	0	0	0	1.27584	0	3.35436	2.78771	1.94272	9.70596	3.06359	11.7039	6.70313	11.6624	5.66677	1.13899	1.34874	1.13324	1.30073	3.3068	0	0	2.6905	1.55158	1.12382	3.62158	0	1.40915	2.88845
FBgn0030930	Pgant7	protein_coding	X	3.19319	1.53897	5.78232	4.28645	12.6624	15.5544	14.8967	14.2256	4.94556	0.613776	0	1.88995	0	1.21752	0	1.9623	0.667438	3.23555	0	0	4.44076	3.82752	4.25852	3.35436	5.57542	4.85679	10.5883	7.14838	5.31995	6.70313	5.83118	1.88892	1.13899	3.37185	0	1.30073	1.6534	2.11561	0	0	1.55158	2.24764	3.62158	0	9.15946	6.35458
FBgn0032820	fbp	protein_coding	2L	87.2806	4.61691	27.466	24.0041	11.9176	13.1614	6.27232	10.8386	46.9828	39.2816	52.9894	49.1387	48.5555	20.6978	45.921	51.0198	38.7114	59.8577	52.7142	66.6974	5.32891	33.1719	4.25852	26.8349	8.36313	12.6277	4.4118	7.14838	40.4316	36.8672	46.6495	51.9454	46.1291	51.9264	61.1949	49.4276	9.92039	13.7515	3.19837	43.048	6.20633	8.99057	41.0446	1.37233	13.3869	9.24303
FBgn0036063	CG6674	protein_coding	3L	0	4.61691	2.89116	0	1.4897	0.797659	1.56808	2.70964	3.09098	0	1.43215	0.944975	0	1.21752	1.58348	0	16.0185	25.8844	41.2546	26.401	0	0	0	1.67718	4.18157	0.971359	0.88236	0	1.06399	3.35157	1.16624	2.83338	1.13899	0.674369	0	0	36.3748	23.2717	31.9837	18.8335	0.775791	0.56191	1.20719	0	0.704574	2.31076
FBgn0046296	DEF8	protein_coding	3L	7.45078	6.15588	2.89116	8.57289	2.9794	3.9883	2.35212	3.38705	0.618195	1.22755	0.716073	0.944975	1.07901	1.21752	1.58348	0	0	2.42666	2.29192	2.77906	3.55261	5.10336	2.12926	5.03154	2.78771	6.79951	6.17652	7.14838	0	0	1.16624	0	1.70849	3.37185	0	3.90218	0	6.34683	1.59918	2.6905	3.87895	10.1144	8.45036	8.23397	5.63659	2.88845
FBgn0035151	CG17129	protein_coding	3L	0	0	0	0	0	0.39883	0	0	0	0	0	0	0	0	0	1.9623	0	0	0	0	0	0	0	1.67718	0	0.971359	0	0	1.06399	0	0	2.83338	0	1.34874	0	0	1.6534	0	0	0	0	0	0	0	0	0
FBti0059759		transposable_element	3R	1.0644	0	0	0.857289	0	0	0	0.677411	0	0	0	0	0	0	0	0	0.667438	0.808887	0	0	0	0	0	0	0	0	0	0	0	0	0	0	0	0	0	0	0	1.0578	0	0	0	0	0	0	0	0
FBgn0000273	Pka-C1	protein_coding	2L	1335.82	86.1823	359.949	438.075	122.9	149.96	133.287	140.901	186.077	179.836	185.463	228.684	943.055	1174.91	999.178	563.18	12.6813	21.0311	34.3788	22.2325	111.019	435.062	151.177	503.154	129.629	151.532	175.59	170.54	131.935	209.473	123.621	108.613	718.134	573.214	545.088	412.33	41.3349	14.8093	57.5706	45.7385	27.9285	198.916	289.727	45.2868	189.53	159.442
FBgn0039764	CG15535	protein_coding	3R	1.0644	0	0	1.71458	2.23455	1.19649	3.13616	2.03223	1.85459	3.06888	3.58036	0.944975	2.15802	0	1.58348	0	0.667438	0	5.72981	4.16859	0.888152	0	0	0	0	0	0.88236	0	3.19197	5.02735	1.16624	0	1.70849	1.34874	2.26648	0	0	1.0578	0	2.6905	0.775791	0	0	0	0	0.577689
FBgn0038402	Fer2	protein_coding	3R	0	0	0	0	0	0	0	0	0	0	0	0	0	0	0	0	0	0	0	0	0	0	0	0	0	0	0	0	0	0	0	0	0	0.674369	0	0	0	1.0578	0	0	0	0	0	0	0	0
FBgn0267070	lncRNA:CR45514	ncRNA	X	0	0	0	0	0	0	0	0	0	0	0	0	0	0	0	0	0	0	0	0	0	0	0	0	0	0	0	0	0	0	0	0	0	0	0	0	0	0	0	0	0	0	0	0	0	0
FBgn0039286	dan	protein_coding	3R	0	0	0	0	0	0	0	0	0	0	0	0	0	0	0	0	0	0	0	0	0	0	0	0	0	0	0	0	0	0	0	0	0	0	0	0	0	0	1.59918	0	0	0	0	0	0	0
FBgn0035987	Cpsf5	protein_coding	3L	2.12879	1.53897	0	3.42916	2.23455	1.99415	3.9202	4.06446	2.47278	3.68265	8.59287	3.7799	5.39505	3.65256	3.16697	3.9246	0.667438	0.808887	0	0	2.66446	2.55168	4.25852	0	0	4.85679	3.52944	4.08479	5.31995	5.02735	5.83118	7.55569	1.70849	2.02311	1.13324	1.30073	1.6534	1.0578	0	0	1.55158	1.68573	2.41439	0	2.8183	2.88845
FBti0018930		transposable_element	2R	0	0	0	0	0	0	0.784039	0	0.618195	0	0	0	0	0	0	0	0	0.808887	0	0	0	0	0	0	0	0	0	0	0	0	0	0	0	0	0	0	0	1.0578	0	0	0	0	0	1.37233	0.704574	0
FBgn0025186	ari-2	protein_coding	2R	15.966	30.7794	20.2381	23.1468	28.3043	26.7216	28.2254	25.7416	24.1096	24.551	26.4947	22.6794	15.1061	3.65256	11.0844	11.7738	8.67669	6.4711	5.72981	5.55812	29.309	22.9651	17.0341	20.1262	33.4525	18.4558	17.6472	16.3392	14.8959	18.4336	23.3247	22.6671	3.98647	9.44117	10.1991	7.80435	13.2272	6.34683	4.79755	21.524	16.2916	26.4098	22.9367	13.7233	31.0013	21.3745
FBgn0038183	CG9286	protein_coding	3R	0	0	0	0	2.9794	0	0	1.35482	4.32737	4.29643	7.16073	4.72487	3.23703	0	0	7.84919	1.33488	0.808887	2.29192	1.38953	0	0	2.12926	0	0	0.971359	2.64708	2.04239	5.31995	5.02735	5.83118	2.83338	1.13899	2.02311	0	1.30073	0	0	0	0	0.775791	0	0	0	0	1.15538
FBgn0029740	CG12680	protein_coding	X	0	0	0	0	0.74485	0	0	0	0	0	0	0	0	0	0	0	0	0	0	0	0	0	0	0	0	0	0	0	0	0	0	0	0	0	0	0	0	0	0	0	0	0	0	0	0	0
FBti0019190		transposable_element	2L	0	0	0	0	0	0	0	0.677411	0.618195	0	0	0	0	0	0	0	0	0	0	0	0	0	0	0	0	0	0	0	0	0	0	0	0	0	0	0	0	0	0	0	0	0	0	0	0	0
FBgn0011837	Tis11	protein_coding	X	5.32199	13.8507	8.67348	11.1448	37.2425	38.2876	39.202	41.9995	9.89112	7.97908	2.86429	7.5598	36.6864	21.9153	11.0844	45.1329	26.0301	25.8844	14.8975	18.0639	4.44076	6.3792	8.51703	10.0631	32.0587	21.3699	22.059	15.318	8.51192	3.35157	8.16366	1.88892	14.8069	8.7668	6.79943	19.5109	14.8806	19.0405	11.1943	37.667	11.6369	5.05719	2.41439	15.0956	26.0692	22.5299
FBti0020295		transposable_element	3R	0	0	0	0	0	0	0	0	0	0.613776	0	0	0	0	0	0	0	0	0	0	0	0	0	0	0	0	0	0	0	0	1.16624	0	0	0	0	0	0	0	0	0	0	0	0	0	0	0
FBgn0034795	MED23	protein_coding	2R	0	0	0	0.857289	0	0	0	0	0	0.613776	0.716073	0	0	0	0	0	0	0	0	1.38953	0	0	0	0	1.39386	0	0.88236	0	0	0	0	0	0	0	0	0	0	0	0	0	0	1.12382	0	0	0	0.577689
FBgn0026398	Or22a	protein_coding	2L	0	0	0	0	2.23455	0	0	0	0	0	0	0	1.07901	0	0	0	0	0	0	0	0	0	0	0	0	0	0	0	0	0	0	0	0	0	0	0	0	0	0	0	0	0	0	0	0	0
[truncated: 11,928 more rows]
[truncated: 34 more columns]

## Sheet: mean
ens_gene	ext_gene	ctrl_3IL	ctrl_1d APF	ctrl_2d APF	ctrl_3d APF	ctrl_4d APF	Atg18_3IL	Atg18_1d APF	Atg18_2d APF	Atg18_3d APF	Atg18_4d APF	FIP_3IL	FIP_1d APF	FIP_2d APF	FIP_3d APF	FIP_4d APF	Stx17_3IL	Stx17_1d APF	Stx17_2d APF	Stx17_3d APF	Stx17_4d APF	sum
[truncated: 13,467 more rows]
