# Supplementary material for: Transcriptional Dynamics Uncover the Role of BNIP3 in Mitophagy during Muscle Remodeling in Drosophila
Source: bioRxiv preprint, doi:10.1101/2024.12.30.630714, version 2 (2025-06-11)
Supplement: Supplementary File 2 [file 630714_file07.xlsx]

## Sheet: Fig. 2E
Raw_volume_average
	3IL	1d	2d	3d	4d
LacZ	556835	141901	37524.9	101158	197885
FIP200	673593	293502	222568	270924	384010
Cell_volume [um^3]
LacZ
	3IL	1d	2d	3d	4d
cell_1	637842	99390	31969.8	115169	224130
cell_2	606567	166174	40490.7	128134	222523
cell_3	476898	121679	42824.6	78281.4	196619
cell_4	603609	133278	42080.3	97917.2	167757
cell_5	459258	188986	30259.3	86288.5	178395
FIP200 RNAi
	3IL	1d	2d	3d	4d
cell_1	701880	312616	183842	279391	480086
cell_2	764400	257581	237221	241499	344239
cell_3	744322	319917	247845	266935	351925
cell_4	540198	263757	217644	326849	362582
cell_5	617167	313639	226287	239947	381219
Normalized_cell_volume
Control (LacZ)
	3IL	1d	2d	3d	4d
cell_1	1.14548	0.178491	0.0574135	0.206828	0.402507
cell_2	1.08931	0.298426	0.0727159	0.230112	0.399622
cell_3	0.856444	0.218519	0.0769071	0.140583	0.3531
cell_4	1.084	0.239349	0.0755705	0.175846	0.301269
cell_5	0.824765	0.339394	0.0543416	0.154962	0.320374
FIP200 RNAi
	3IL	1d	2d	3d	4d
cell_1	1.04199	0.464102	0.272927	0.414778	0.712723
cell_2	1.13481	0.382398	0.352172	0.358524	0.511049
cell_3	1.105	0.47494	0.367945	0.396285	0.52246
cell_4	0.801964	0.391566	0.323108	0.485232	0.538281
cell_5	0.916231	0.465621	0.33594	0.35622	0.565949
Fig2E
Mean	3IL	1d	2d	3d	4d
Control (LacZ)	1	0.254836	0.0673897	0.181666	0.355375
FIP200 RNAi	1	0.435725	0.330419	0.402208	0.570092
Stdev
LacZ	0.147913	0.0641042	0.010673	0.036793	0.0456534
FIP200	0.138922	0.0448067	0.0362998	0.0527003	0.0823526

## Sheet: Fig. 3D
RNA-seq normalized count
	Bnip3	Zonda	CG12511	Pink1	Park	Key	Ref(2)p	IKKepsilon
Sample 1	251.014	23.0903	0	14.1521	0.74485	5.21395	47.6704	4.4691
Sample 2	242.488	29.5134	0	11.1672	0	3.19064	40.6806	3.58947
Sample 3	265.005	30.5775	0	22.7371	0	2.35212	47.0424	3.9202
Sample 4	311.609	39.9672	0	12.1934	0	6.0967	62.9992	2.70964

## Sheet: Fig. 3E
RNA-seq normalized count
stage	BNIP3				Fbxl4
3 IL	72.379	872.595	375.851	390.924	5.32199	20.0066	11.5646	6.00102
1d APF	251.014	242.488	265.005	311.609	3.72425	2.39298	2.35212	2.03223
2d APF	3.70917	3.06888	9.30895	9.44975	0.618195	2.4551	2.86429	1.88995
3d APF	3.23703	2.43504	23.7523	0	4.31604	1.21752	0	0
4d APF	316.366	204.649	130.64	268.179	34.7068	24.2666	25.2111	29.1801

## Sheet: Fig. 4C
Group	mitochondria(nm2)	all_area(nm2)	mitochondria(nm2)/all_area(nm2)	Mito/Total (%)
wild type_1	741453	5.83268e+06	0.12712	12.712
wild type_2	605829	5.83268e+06	0.103868	10.3868
wild type_3	733817	5.83268e+06	0.125811	12.5811
wild type_4	599712	5.83268e+06	0.102819	10.2819
wild type_5	614616	5.83268e+06	0.105375	10.5375
wild type_6	546068	5.83268e+06	0.0936222	9.36222
wild type_7	428480	5.64696e+06	0.0758781	7.58781
wild type_8	514998	5.83268e+06	0.0882952	8.82952
wild type_9	498234	5.83268e+06	0.0854211	8.54211
BNIP3 KO_1	1.98342e+06	5.83268e+06	0.340053	34.0053
BNIP3 KO_2	4.16458e+06	5.83268e+06	0.714007	71.4007
BNIP3 KO_3	1.88418e+06	5.83268e+06	0.323038	32.3038
BNIP3 KO_4	1.3415e+06	5.83268e+06	0.229997	22.9997
BNIP3 KO_5	2.20537e+06	5.83268e+06	0.378106	37.8106
BNIP3 KO_6	2.42562e+06	5.83268e+06	0.415867	41.5867
BNIP3 KO_7	1.52486e+06	5.04714e+06	0.302124	30.2124
BNIP3 KO_8	1.71467e+06	5.21574e+06	0.32875	32.875
BNIP3 KO_9	1.78015e+06	5.57733e+06	0.319175	31.9175
BNIP3 KO_10	1.03053e+06	4.76821e+06	0.216125	21.6125
BNIP3 KO_11	938987	5.16153e+06	0.18192	18.192
BNIP3 KO_12	1.0777e+06	5.19303e+06	0.207528	20.7528

## Sheet: Fig. 4F
Group	Mitophagosomes per area	Mitochondria per area
Stx17 RNAi_1	1.12854	0
Stx17 RNAi_2	0.902835	0
Stx17 RNAi_3	1.12854	0
Stx17 RNAi_4	0.902835	0
Stx17 RNAi_5	1.12854	0
Stx17 RNAi_6	1.2414	0
Stx17 RNAi_7	1.12854	0.112854
Stx17 RNAi_8	0.902835	0
Stx17 RNAi_9	0.677126	0
Stx17 RNAi_10	0.902835	0
Stx17 RNAi_11	0.902835	0
Stx17 RNAi_12	1.01569	0
Stx17 RNAi_13	0.902835	0
Stx17 RNAi_14	0.677126	0.225709
Stx17 RNAi_15	0.451417	0.451417
Stx17 RNAi_16	1.01569	0.225709
Stx17 RNAi_17	0.902835	0.677126
Stx17 RNAi_18	0.451417	0.225709
Stx17 RNAi_19	0.564272	0.112854
Stx17 RNAi_20	0.78998	0.112854
Stx17 RNAi+BNIP3 KO_1	0	0.78998
Stx17 RNAi+BNIP3 KO_2	0.112854	1.57996
Stx17 RNAi+BNIP3 KO_3	0.112854	1.12854
Stx17 RNAi+BNIP3 KO_4	0.112854	0.78998
Stx17 RNAi+BNIP3 KO_5	0	0.564272
Stx17 RNAi+BNIP3 KO_6	0	1.01569
Stx17 RNAi+BNIP3 KO_7	0	0.338563
Stx17 RNAi+BNIP3 KO_8	0	1.12854
Stx17 RNAi+BNIP3 KO_9	0	0.564272
Stx17 RNAi+BNIP3 KO_10	0.112854	1.35425
Stx17 RNAi+BNIP3 KO_11	0	0.902835
Stx17 RNAi+BNIP3 KO_12	0	0.564272
Stx17 RNAi+BNIP3 KO_13	0.225709	0.902835
Stx17 RNAi+BNIP3 KO_14	0	1.35425
Stx17 RNAi+BNIP3 KO_15	0	0.677126
Stx17 RNAi+BNIP3 KO_16	0	0.902835
Stx17 RNAi+BNIP3 KO_17	0	1.01569

## Sheet: Fig. 4G
Group	# of Autophagosomes per area
Stx17 RNAi_1	3.38563
Stx17 RNAi_2	3.83705
Stx17 RNAi_3	3.83705
Stx17 RNAi_4	3.49848
Stx17 RNAi_5	3.72419
Stx17 RNAi_6	4.51417
Stx17 RNAi_7	3.83705
Stx17 RNAi_8	3.72419
Stx17 RNAi_9	3.04707
Stx17 RNAi_10	3.04707
Stx17 RNAi_11	2.59565
Stx17 RNAi_12	4.17561
Stx17 RNAi_13	3.61134
Stx17 RNAi_14	6.31984
Stx17 RNAi_15	4.51417
Stx17 RNAi_16	6.88411
Stx17 RNAi_17	4.85274
Stx17 RNAi_18	4.96559
Stx17 RNAi_19	3.83705
Stx17 RNAi_20	4.73988
Stx17 RNAi+BNIP3 KO_1	5.07844
Stx17 RNAi+BNIP3 KO_2	5.64272
Stx17 RNAi+BNIP3 KO_3	4.73988
Stx17 RNAi+BNIP3 KO_4	4.51417
Stx17 RNAi+BNIP3 KO_5	5.41701
Stx17 RNAi+BNIP3 KO_6	4.62703
Stx17 RNAi+BNIP3 KO_7	6.6584
Stx17 RNAi+BNIP3 KO_8	4.62703
Stx17 RNAi+BNIP3 KO_9	3.27278
Stx17 RNAi+BNIP3 KO_10	2.93421
Stx17 RNAi+BNIP3 KO_11	1.2414
Stx17 RNAi+BNIP3 KO_12	2.82136
Stx17 RNAi+BNIP3 KO_13	3.9499
Stx17 RNAi+BNIP3 KO_14	2.14423
Stx17 RNAi+BNIP3 KO_15	2.25709
Stx17 RNAi+BNIP3 KO_16	3.83705
Stx17 RNAi+BNIP3 KO_17	2.82136

## Sheet: Fig. 5D prime
Group	Mitochondria area per cell
(-)	48.3279
(-)	47.3598
(-)	34.1783
(-)	46.5523
(-)	62.1942
(-)	65.4439
(-)	50.3852
(-)	45.1658
(-)	60.9022
(-)	43.5038
(-)	50.5045
(-)	43.5733
(-)	45.4024
(-)	56.13
(-)	52.131
(-)	60.5236
(-)	53.7293
(-)	32.5352
(-)	69.3837
(-)	52.3627
(-)	58.5433
(-)	32.4811
(-)	44.1065
(-)	68.0449
(-)	38.2783
(-)	35.1179
(-)	45.9313
(-)	43.9469
(-)	53.0252
(-)	47.24
(-)	47.2866
(-)	43.2938
(-)	57.1667
(-)	53.0827
(-)	48.6228
(-)	49.0231
(-)	40.5315
(-)	60.475
(-)	62.4319
(-)	43.8936
(-)	42.9943
(-)	53.4078
(-)	45.7083
(-)	41.0196
(-)	44.1484
(-)	43.725
Full	21.4001
Full	12.7668
Full	11.7434
Full	11.861
Full	25.2007
Full	5.65341
Full	13.6613
Full	12.8374
Full	8.40333
Full	8.92353
Full	32.6021
Full	6.55201
Full	7.76534
Full	36.077
Full	7.8549
Full	11.132
Full	2.13029
Full	7.80809
Full	11.5602
Full	20.5466
Full	20.0427
Full	5.79092
Full	8.23425
Full	15.2329
Full	8.48882
Full	7.55525
Full	12.1057
Full	10.4669
Full	13.5219
Full	12.2425
Full	13.8832
Full	11.0644
Full	12.0238
Full	9.71394
Full	10.8411
Full	6.41732
Full	10.2328
Full	7.0357
Full	8.43419
Full	6.15264
Full	5.90015
Full	10.1627
Full	7.03119
Full	14.3136
Full	12.4231
Full	10.9257
Full	12.9917
Full	11.9934
Full	12.0187
Full	12.1532
Full	16.0487
Full	8.67565
Full	7.23601
Full	14.3277
Full	14.2545
DLIR	20.5314
DLIR	21.5872
DLIR	16.7218
DLIR	17.1734
DLIR	12.19
DLIR	22.6444
DLIR	16.9905
DLIR	11.9818
DLIR	28.0833
DLIR	18.0357
DLIR	6.12887
DLIR	6.95295
DLIR	14.5706
DLIR	11.0462
DLIR	9.89588
DLIR	20.1074
DLIR	25.0711
DLIR	23.6512
DLIR	31.3329
DLIR	17.3646
DLIR	22.8448
DLIR	10.8762
DLIR	38.3901
DLIR	20.3426
DLIR	16.6849
DLIR	20.8198
DLIR	9.49278
DLIR	53.3329
DLIR	11.8274
DLIR	21.9628
DLIR	3.36933
DLIR	10.1788
DLIR	12.0916
DLIR	10.1286
DLIR	4.01151
DLIR	5.73931
DLIR	9.52822
DLIR	9.897
DLIR	17.4537
DLIR	23.5925
DLIR	13.1231
DLIR	11.6045
DLIR	15.5451
DLIR	26.348
DLIR	6.8985
DLIR	13.929
DLIR	7.62926
DLIR	11.2981
DLIR	4.06552
DLIR	6.5782
DLIR	15.6128
DLIR	6.94667
MERmut	30.8429
MERmut	21.5966
MERmut	12.3221
MERmut	28.3558
MERmut	35.0205
MERmut	22.9485
MERmut	11.5555
MERmut	40.0474
MERmut	14.5414
MERmut	15.2323
MERmut	27.8179
MERmut	21.6183
MERmut	19.3311
MERmut	28.0411
MERmut	19.5365
MERmut	20.8809
MERmut	24.2951
MERmut	14.8128
MERmut	22.3021
MERmut	29.5626
MERmut	33.7739
MERmut	27.2779
MERmut	30.6582
MERmut	25.4185
MERmut	25.415
MERmut	26.0941
MERmut	26.322
MERmut	33.3433
MERmut	29.773
MERmut	27.4653
MERmut	26.0101
MERmut	26.829
MERmut	21.5971
MERmut	26.0145
MERmut	21.5083
MERmut	13.6252
MERmut	23.7612
MERmut	41.3331
MERmut	14.5687
MERmut	20.9806
MERmut	23.7122
MERmut	12.5557
MERmut	7.21694
MERmut	16.3751
MERmut	25.9913
MERmut	7.39225
MERmut	21.8919
MERmut	33.1788
DMER	25.1123
DMER	25.9185
DMER	36.9
DMER	14.9263
DMER	29.4124
DMER	20.9422
DMER	28.8031
DMER	50.9416
DMER	33.8626
DMER	29.2291
DMER	10.7994
DMER	5.18213
DMER	25.3037
DMER	24.8194
DMER	27.962
DMER	26.6533
DMER	22.6706
DMER	25.8221
DMER	27.868
DMER	17.8361
DMER	25.1708
DMER	22.4964
DMER	14.265
DMER	12.522
DMER	9.17634
DMER	24.6301
DMER	4.34138
DMER	12.0625
DMER	11.53
DMER	5.26596
DMER	13.9302
DMER	12.0797
DMER	18.472
DMER	10.8144
DMER	13.7584
DMER	8.66184
DMER	10.3556
DMER	15.2755
DMER	11.5055
DMER	15.4496
DMER	6.0687
DMER	12.9111
DMER	5.29942
DMER	12.552
DMER	14.2804
DMER	14.6326
DMER	20.0974
DMER	18.649
DMER	21.3414
DMER	24.2208
DMER	11.3923
DMER	27.5388
DMER	30.1213
DMER	18.7682
DLIR+DMER	54.1552
DLIR+DMER	69.2822
DLIR+DMER	50.1551
DLIR+DMER	51.1233
DLIR+DMER	49.1258
DLIR+DMER	56.7161
DLIR+DMER	46.5993
DLIR+DMER	52.5699
DLIR+DMER	65.5823
DLIR+DMER	50.665
DLIR+DMER	50.8085
DLIR+DMER	45.6086
DLIR+DMER	52.6645
DLIR+DMER	82.1157
DLIR+DMER	49.4756
DLIR+DMER	63.2349
DLIR+DMER	56.5663
DLIR+DMER	47.6819
DLIR+DMER	64.3792
DLIR+DMER	50.3256
DLIR+DMER	31.2241
DLIR+DMER	78.4515
DLIR+DMER	52.1189
DLIR+DMER	45.5746
DLIR+DMER	51.6518
DLIR+DMER	59.5455
DLIR+DMER	46.2795
DLIR+DMER	44.2489
DLIR+DMER	46.6766
DLIR+DMER	51.9695
DLIR+DMER	54.7545
DLIR+DMER	54.1418
DLIR+DMER	58.6208
DLIR+DMER	47.9511
DLIR+DMER	35.5665
DLIR+DMER	50.996
DLIR+DMER	47.0578
DLIR+DMER	44.3834
DLIR+DMER	54.5023
DLIR+DMER	55.876
DLIR+DMER	44.9541
DLIR+DMER	38.0778
DLIR+DMER	50.3475
DLIR+DMER	56.1142
DLIR+DMER	59.2717
DLIR+DMER	57.2694
DLIR+DMER	57.0468
DLIR+DMER	55.7037
DLIR+DMER	59.3502
DLIR+DMER	53.9542
DLIR+DMER	91.9012

## Sheet: Fig. 6A prime
Group	Time point	Mitochondria area per cell
Control_1	3IL	0.399963
Control_2	3IL	0.453348
Control_3	3IL	0.49789
Control_4	3IL	0.580078
Control_5	3IL	0.516105
Control_6	3IL	0.543049
Control_7	3IL	0.491101
Control_8	3IL	0.563414
Control_9	3IL	0.489401
Control_10	3IL	0.520787
Control_11	3IL	0.436791
Control_12	3IL	0.498896
Control_13	3IL	0.678587
Control_14	3IL	0.536034
Control_15	3IL	0.486335
Control_16	3IL	0.436937
Control_17	3IL	0.445414
Control_18	3IL	0.291186
BNIP3 KO_1	3IL	0.606481
BNIP3 KO_2	3IL	0.522264
BNIP3 KO_3	3IL	0.587921
BNIP3 KO_4	3IL	0.237596
BNIP3 KO_5	3IL	0.554355
BNIP3 KO_6	3IL	0.499307
BNIP3 KO_7	3IL	0.461367
BNIP3 KO_8	3IL	0.400148
BNIP3 KO_9	3IL	0.387534
BNIP3 KO_10	3IL	0.411032
BNIP3 KO_11	3IL	0.45965
BNIP3 KO_12	3IL	0.445144
BNIP3 KO_13	3IL	0.450023
BNIP3 KO_14	3IL	0.298562
BNIP3 KO_15	3IL	0.511177
BNIP3 KO_16	3IL	0.573089
BNIP3 KO_17	3IL	0.417657
Control_1	1 d APF	0.258908
Control_2	1 d APF	0.295008
Control_3	1 d APF	0.321716
Control_4	1 d APF	0.418425
Control_5	1 d APF	0.318601
Control_6	1 d APF	0.316444
Control_7	1 d APF	0.47164
Control_8	1 d APF	0.398315
Control_9	1 d APF	0.340086
Control_10	1 d APF	0.224194
Control_11	1 d APF	0.396318
Control_12	1 d APF	0.517254
Control_13	1 d APF	0.389207
Control_14	1 d APF	0.500098
Control_15	1 d APF	0.374083
Control_16	1 d APF	0.374608
Control_17	1 d APF	0.392675
Control_18	1 d APF	0.481165
Control_19	1 d APF	0.349602
Control_20	1 d APF	0.179118
BNIP3 KO_1	1 d APF	0.814846
BNIP3 KO_2	1 d APF	0.86177
BNIP3 KO_3	1 d APF	0.858636
BNIP3 KO_4	1 d APF	0.783522
BNIP3 KO_5	1 d APF	0.716461
BNIP3 KO_6	1 d APF	0.871786
BNIP3 KO_7	1 d APF	0.699347
BNIP3 KO_8	1 d APF	0.753057
BNIP3 KO_9	1 d APF	0.807417
BNIP3 KO_10	1 d APF	0.636519
BNIP3 KO_11	1 d APF	0.720581
BNIP3 KO_12	1 d APF	0.753067
BNIP3 KO_13	1 d APF	0.745473
BNIP3 KO_14	1 d APF	0.684813
BNIP3 KO_15	1 d APF	0.652889
BNIP3 KO_16	1 d APF	0.734688
BNIP3 KO_17	1 d APF	0.82798
BNIP3 KO_18	1 d APF	0.637621

## Sheet: Fig. 6B prime
Group	Pearson's R value
Control_1	0.08
Control_2	0.13
Control_3	0.18
Control_4	0.12
Control_5	0.13
Control_6	0.05
BNIP3 KO_1	0.73
BNIP3 KO_2	0.7
BNIP3 KO_3	0.62
BNIP3 KO_4	0.83
BNIP3 KO_5	0.76
FIP200 RNAi_1	0.97
FIP200 RNAi_2	0.99
FIP200 RNAi_3	0.93
FIP200 RNAi_4	0.97
FIP200 RNAi_5	0.98

## Sheet: Fig. 6D prime
Group	Time point	Normalized intensity of GFP
Control_1	3IL	0.803647
Control_2	3IL	1.03306
Control_3	3IL	1.0898
Control_4	3IL	1.12079
Control_5	3IL	1.1045
Control_6	3IL	1.0093
Control_7	3IL	1.09329
Control_8	3IL	1.01046
Control_9	3IL	1.01606
Control_10	3IL	1.0796
Control_11	3IL	0.897316
Control_12	3IL	0.875514
Control_13	3IL	0.936848
Control_14	3IL	0.98575
Control_15	3IL	0.960579
Control_16	3IL	0.983484
BNIP3 KO_1	3IL	0.909075
BNIP3 KO_2	3IL	0.894009
BNIP3 KO_3	3IL	0.944136
BNIP3 KO_4	3IL	0.940553
BNIP3 KO_5	3IL	0.832614
BNIP3 KO_6	3IL	0.984433
BNIP3 KO_7	3IL	0.933786
BNIP3 KO_8	3IL	0.933112
BNIP3 KO_9	3IL	0.918292
BNIP3 KO_10	3IL	0.93054
BNIP3 KO_11	3IL	0.946463
BNIP3 KO_12	3IL	0.938685
BNIP3 KO_13	3IL	0.895295
BNIP3 KO_14	3IL	0.903624
BNIP3 KO_15	3IL	0.968571
Control_1	4 d APF	1.18795
Control_2	4 d APF	0.76154
Control_3	4 d APF	0.741523
Control_4	4 d APF	1.1552
Control_5	4 d APF	0.657818
Control_6	4 d APF	1.16217
Control_7	4 d APF	1.06725
Control_8	4 d APF	1.22192
Control_9	4 d APF	0.968378
Control_10	4 d APF	0.975353
Control_11	4 d APF	0.988091
Control_12	4 d APF	1.11608
Control_13	4 d APF	0.965345
Control_14	4 d APF	0.932287
Control_15	4 d APF	1.09909
BNIP3 KO_1	4 d APF	10.3571
BNIP3 KO_2	4 d APF	11.946
BNIP3 KO_3	4 d APF	14.1896
BNIP3 KO_4	4 d APF	11.6906
BNIP3 KO_5	4 d APF	17.9079
BNIP3 KO_6	4 d APF	12.7551
BNIP3 KO_7	4 d APF	12.6899
BNIP3 KO_8	4 d APF	16.5828
BNIP3 KO_9	4 d APF	13.631
BNIP3 KO_10	4 d APF	19.2842
BNIP3 KO_11	4 d APF	22.0935
BNIP3 KO_12	4 d APF	20.9337
BNIP3 KO_13	4 d APF	15.4922
BNIP3 KO_14	4 d APF	22.9005
BNIP3 KO_15	4 d APF	15.535

[truncated: 8 more sheets: Fig. 2-fig sup1BCD, Fig. 2-fig sup2A, Fig. 2-fig sup2C, Fig. 2-fig sup2E, Fig. 2-fig sup2F, Fig. 3-fig sup2A, Fig. 3-fig sup2B, Fig. 3-fig sup2C]
